# Supplementary material for: Computational study on gold-catalyzed (4 + 3) intramolecular cycloaddition of trienyne: mechanism, reactivity and selectivity
Source: Royal Society of Chemistry journal article supplement (doi:10.1039/c6ra17436a), 2016-01-01
Supplement: c6ra17436a1.pdf [file c6ra17436a1.pdf]

## Supporting information

### Computational Study on Gold-catalyzed (4+3) Intramolecular Cycloaddition of Trienyne: Mechanism, Reactivity and Selectivity

Meng-Ru Li and Gui-Chang Wang\*

( Department of Chemistry, Tianjin Key Lab of Metal and Molecule-based Material  
Chemistry and Synergetic Innovation Center of Chemical Science and Engineering  
(Tianjin), Nankai University, Tianjin 300071, P. R. China)

\*Corresponding authors: Gui-Chang Wang. E-mails: wangguichang@nankai.edu.cn

Telephone: +86-22-23503824 (O) Fax: +86-22-23502458

#### **Contents:**

**Table S1** Cartesian coordinates of some key stationary points.

**Table S1** Cartesian coordinates of some key stationary points optimized at the basis level 6-31g(d) for main group elements and lanl2dz for Au at 298 K using the B3LYP method

**S1-1** Cartesian coordinates in Figure 1

1a

|   |             |             |             |
|---|-------------|-------------|-------------|
| C | -4.33333400 | 0.70851600  | 0.79135200  |
| C | -4.33731400 | -0.72336400 | 1.33531800  |
| C | -4.97206100 | -1.73278600 | 0.70129100  |
| C | -2.22626800 | 0.13112600  | -0.54437200 |
| C | -2.85843500 | 1.07865300  | 0.41339100  |
| C | -5.44068800 | 1.06717900  | -0.25225300 |
| C | -5.92940200 | 2.51889600  | -0.08305600 |
| C | -5.10792600 | 0.79215900  | -1.72898500 |
| C | -2.07135100 | -0.73907600 | -1.40828900 |
| C | -3.56195500 | -0.91582200 | 2.62218400  |
| C | -5.01744900 | -3.13584400 | 1.09364700  |
| C | -5.65046300 | -4.07807100 | 0.37426700  |
| C | -2.02265500 | -1.73706000 | -2.42980400 |
| C | -2.59388000 | -2.94402100 | -2.28302000 |
| O | -2.83092000 | 2.42304000  | -0.11172000 |
| C | -1.67778500 | 3.12471200  | 0.03280300  |
| C | -1.82744000 | 4.52877100  | -0.48810200 |
| O | -0.67135200 | 2.64831800  | 0.52131400  |
| H | -4.52117600 | 1.35870500  | 1.65859700  |
| H | -5.51492100 | -1.51260600 | -0.21467400 |
| H | -2.26294900 | 1.07495700  | 1.32873500  |
| H | -6.29252900 | 0.43094000  | 0.01686000  |
| H | -6.79755200 | 2.69908300  | -0.72680300 |
| H | -6.23911500 | 2.71735800  | 0.94982200  |
| H | -5.15559800 | 3.24318200  | -0.35196100 |
| H | -5.98822300 | 1.00359500  | -2.34611700 |
| H | -4.82109500 | -0.24734300 | -1.91636500 |
| H | -4.29844400 | 1.43836800  | -2.08522200 |
| H | -3.72245400 | -0.07193100 | 3.30494100  |
| H | -3.85471500 | -1.82325900 | 3.15385800  |
| H | -2.47808500 | -0.98259300 | 2.44649500  |
| H | -4.50709700 | -3.43519800 | 2.00625400  |
| H | -5.66951100 | -5.11746500 | 0.68678500  |
| H | -6.18474600 | -3.83467200 | -0.54182300 |
| H | -1.52552200 | -1.46227100 | -3.35736100 |

|                  |             |             |             |
|------------------|-------------|-------------|-------------|
| H                | -2.57110300 | -3.66132700 | -3.09752700 |
| H                | -3.10317000 | -3.23736600 | -1.36953300 |
| H                | -2.07742000 | 4.50661200  | -1.55416000 |
| H                | -0.89709600 | 5.07638300  | -0.33635600 |
| H                | -2.64756500 | 5.03697900  | 0.02900000  |
| H                | 6.11761600  | 2.10176800  | -2.30619100 |
| C                | 5.14974200  | 2.22912900  | -1.83039500 |
| C                | 4.56173000  | 3.49301900  | -1.76149300 |
| C                | 4.49549700  | 1.12077200  | -1.28925600 |
| C                | 3.31463300  | 3.65226800  | -1.15071600 |
| H                | 5.07255400  | 4.35291900  | -2.18497300 |
| C                | 3.24262500  | 1.27866400  | -0.67752200 |
| H                | 4.95906900  | 0.14128300  | -1.34695100 |
| C                | 2.64914500  | 2.55160100  | -0.61246300 |
| H                | 2.85655600  | 4.63566400  | -1.09744600 |
| P                | 2.37060500  | -0.14171100 | 0.07054300  |
| H                | 1.67677300  | 2.68349300  | -0.14486400 |
| C                | 3.18257700  | -1.66724200 | -0.52406100 |
| C                | 2.62971700  | -0.05778200 | 1.87751400  |
| Au               | 0.08029800  | -0.12903800 | -0.42622400 |
| C                | 4.20977100  | -2.27560800 | 0.21394200  |
| C                | 2.79258500  | -2.21820600 | -1.75553500 |
| C                | 3.64198000  | 0.73961100  | 2.43159000  |
| C                | 1.81376900  | -0.83149000 | 2.71974400  |
| C                | 4.83881600  | -3.41975900 | -0.28028500 |
| H                | 4.51507500  | -1.86407500 | 1.17083000  |
| C                | 3.42845700  | -3.35770800 | -2.24564600 |
| H                | 1.99174400  | -1.75745300 | -2.32837400 |
| C                | 3.83506100  | 0.75755800  | 3.81451300  |
| H                | 4.27319500  | 1.34698800  | 1.79096600  |
| C                | 2.01489200  | -0.81179300 | 4.09859500  |
| H                | 1.02588600  | -1.45030000 | 2.29692000  |
| C                | 4.45085300  | -3.96019500 | -1.50760600 |
| H                | 5.63024500  | -3.88865000 | 0.29688500  |
| H                | 3.12251700  | -3.77874300 | -3.19883500 |
| C                | 3.02446300  | -0.01549700 | 4.64709600  |
| H                | 4.61802200  | 1.37905600  | 4.23882700  |
| H                | 1.38219600  | -1.41287200 | 4.74502400  |
| H                | 4.94091900  | -4.85196200 | -1.88718800 |
| H                | 3.17587900  | 0.00372400  | 5.72237900  |
| Ts <sub>1a</sub> |             |             |             |
| C                | 4.09217800  | -0.33686400 | 1.23932600  |
| C                | 4.58071600  | 0.97729600  | 0.65003700  |

|   |             |             |             |
|---|-------------|-------------|-------------|
| C | 2.57627400  | 1.57164200  | 0.00071700  |
| C | 4.70481500  | 1.10816200  | -0.72652300 |
| C | 1.97268000  | 0.43380000  | 0.20688300  |
| C | 2.79711600  | -0.80390000 | 0.53035700  |
| C | 5.21546600  | -1.40327700 | 1.46040400  |
| C | 4.64206400  | -2.65811400 | 2.14086300  |
| C | 6.05110900  | -1.77622500 | 0.22580500  |
| C | 5.12631000  | 1.98655800  | 1.62601300  |
| C | 5.30616900  | 2.21308000  | -1.45090600 |
| C | 5.44025400  | 2.18974800  | -2.78913600 |
| C | 2.45344300  | 2.98866600  | -0.20825000 |
| C | 1.79684900  | 3.78597100  | 0.65156900  |
| O | 3.08095200  | -1.51935000 | -0.69863900 |
| C | 2.19726400  | -2.49362100 | -1.06829600 |
| C | 2.61671100  | -3.13533700 | -2.36591000 |
| O | 1.21650300  | -2.77964200 | -0.41856000 |
| H | 3.73893700  | -0.09293300 | 2.25066800  |
| H | 4.40104600  | 0.26316700  | -1.33722700 |
| H | 2.24008100  | -1.48208700 | 1.17631500  |
| H | 5.90324300  | -0.93755100 | 2.18093600  |
| H | 5.45532400  | -3.32439100 | 2.44689200  |
| H | 4.06428200  | -2.40726900 | 3.03848400  |
| H | 3.99116600  | -3.22592700 | 1.46637700  |
| H | 6.84619700  | -2.46909100 | 0.52197100  |
| H | 6.53462100  | -0.90364400 | -0.22704800 |
| H | 5.44765100  | -2.26759900 | -0.54195500 |
| H | 4.43946000  | 2.12374400  | 2.46764400  |
| H | 6.07308200  | 1.61516300  | 2.04177200  |
| H | 5.32032000  | 2.96421400  | 1.18208700  |
| H | 5.68654700  | 3.06430000  | -0.89327400 |
| H | 5.92406900  | 2.99941600  | -3.32646100 |
| H | 5.08221700  | 1.35330000  | -3.38477300 |
| H | 2.90751400  | 3.40583200  | -1.10440200 |
| H | 1.67569700  | 4.84575200  | 0.44708300  |
| H | 1.34280500  | 3.39706300  | 1.55816000  |
| H | 2.59673200  | -2.39380000 | -3.17199100 |
| H | 1.93421800  | -3.95160100 | -2.60348200 |
| H | 3.64069300  | -3.51538600 | -2.29318700 |
| H | -5.41080100 | -2.07691500 | -3.40997800 |
| C | -4.49373500 | -2.16629800 | -2.83484900 |
| C | -3.67506100 | -3.28713700 | -2.98811000 |
| C | -4.13611000 | -1.15393500 | -1.94296800 |
| C | -2.49331900 | -3.39496800 | -2.25111800 |
| H | -3.95588900 | -4.07291500 | -3.68363200 |

|    |             |             |             |
|----|-------------|-------------|-------------|
| C  | -2.95058800 | -1.26049100 | -1.19857900 |
| H  | -4.77582800 | -0.28395300 | -1.83147600 |
| C  | -2.12456600 | -2.38545200 | -1.36176000 |
| H  | -1.85230900 | -4.26370700 | -2.37039000 |
| P  | -2.46822200 | 0.01923300  | 0.01742000  |
| H  | -1.19586400 | -2.47530900 | -0.80468700 |
| C  | -3.34888700 | 1.55416400  | -0.45706500 |
| C  | -3.15467200 | -0.49863600 | 1.63482800  |
| Au | -0.11230100 | 0.30634600  | 0.11405700  |
| C  | -4.55678500 | 1.93236800  | 0.14781300  |
| C  | -2.80107100 | 2.35948300  | -1.46950900 |
| C  | -4.18946000 | -1.44107900 | 1.73090000  |
| C  | -2.63426200 | 0.07756400  | 2.80555900  |
| C  | -5.20856800 | 3.09801200  | -0.26073500 |
| H  | -4.98677200 | 1.32427400  | 0.93748600  |
| C  | -3.45922400 | 3.51874900  | -1.87724800 |
| H  | -1.86106500 | 2.07800700  | -1.93794900 |
| C  | -4.69872700 | -1.79478700 | 2.98204300  |
| H  | -4.59336000 | -1.90347400 | 0.83580000  |
| C  | -3.15059900 | -0.27502400 | 4.05156800  |
| H  | -1.82361300 | 0.79915500  | 2.74110500  |
| C  | -4.66297900 | 3.89027000  | -1.27202500 |
| H  | -6.14207300 | 3.38565500  | 0.21420100  |
| H  | -3.03078300 | 4.13441600  | -2.66293700 |
| C  | -4.18258600 | -1.21297200 | 4.14109600  |
| H  | -5.49714100 | -2.52811500 | 3.04862700  |
| H  | -2.74310800 | 0.17571300  | 4.95188600  |
| H  | -5.17179800 | 4.79697400  | -1.58633200 |
| H  | -4.57937200 | -1.49283200 | 5.11268900  |
| 2a |             |             |             |
| C  | -4.21315800 | 0.24149800  | 1.16996800  |
| C  | -4.32449200 | -1.15680000 | 0.54424500  |
| C  | -2.79987300 | -1.55754400 | 0.22634400  |
| C  | -4.13166300 | -1.18977400 | -0.89721000 |
| C  | -1.99814800 | -0.42296600 | 0.33484500  |
| C  | -2.85747500 | 0.79964000  | 0.66105800  |
| C  | -5.48130600 | 1.13324300  | 1.12022000  |
| C  | -5.22280500 | 2.47725400  | 1.82334800  |
| C  | -6.10831800 | 1.34194200  | -0.26864800 |
| C  | -5.18547300 | -2.17486800 | 1.26529400  |
| C  | -4.50630600 | -2.28443300 | -1.78877700 |
| C  | -4.48233200 | -2.13803800 | -3.12319300 |
| C  | -2.32050100 | -2.95808100 | 0.20905300  |
| C  | -1.46367400 | -3.44211600 | 1.11472800  |

|    |             |             |             |
|----|-------------|-------------|-------------|
| O  | -2.98306500 | 1.61085700  | -0.53525000 |
| C  | -2.11506400 | 2.66170800  | -0.67125100 |
| C  | -2.36736100 | 3.39864600  | -1.96128000 |
| O  | -1.26711600 | 2.92978500  | 0.14849400  |
| H  | -4.02615800 | 0.05649500  | 2.23805100  |
| H  | -3.92018100 | -0.25112500 | -1.39574200 |
| H  | -2.36458800 | 1.41323200  | 1.41775700  |
| H  | -6.22747400 | 0.59809200  | 1.72546300  |
| H  | -6.15692000 | 3.03991600  | 1.92229600  |
| H  | -4.81407500 | 2.33505600  | 2.83079900  |
| H  | -4.52171300 | 3.10231100  | 1.25900100  |
| H  | -7.02699400 | 1.93032600  | -0.16986500 |
| H  | -6.38581200 | 0.39451500  | -0.74540000 |
| H  | -5.43798700 | 1.88193000  | -0.94330700 |
| H  | -4.92067900 | -2.20599700 | 2.32672300  |
| H  | -6.24157400 | -1.89357700 | 1.18587300  |
| H  | -5.07369100 | -3.18618800 | 0.86830000  |
| H  | -4.87088000 | -3.21127900 | -1.35589700 |
| H  | -4.82899900 | -2.92546700 | -3.78526600 |
| H  | -4.13013500 | -1.22310600 | -3.59354100 |
| H  | -2.69280800 | -3.61613600 | -0.57192100 |
| H  | -1.12253400 | -4.47201400 | 1.06821000  |
| H  | -1.07818600 | -2.83315300 | 1.92791000  |
| H  | -2.07026700 | 2.76940000  | -2.80797800 |
| H  | -1.78097400 | 4.31774900  | -1.97275400 |
| H  | -3.43052900 | 3.62915600  | -2.07623700 |
| H  | 5.17415600  | 2.51079600  | -3.29138400 |
| C  | 4.30725000  | 2.53615800  | -2.63744700 |
| C  | 3.52605500  | 3.69014300  | -2.55185000 |
| C  | 3.97785400  | 1.40839800  | -1.88332200 |
| C  | 2.40871600  | 3.71570600  | -1.71353300 |
| H  | 3.78553400  | 4.56619700  | -3.13940300 |
| C  | 2.85794000  | 1.43105100  | -1.03792800 |
| H  | 4.58934900  | 0.51454600  | -1.95781800 |
| C  | 2.06785800  | 2.59095400  | -0.96211100 |
| H  | 1.79721900  | 4.61088900  | -1.64501000 |
| P  | 2.40985000  | -0.00768700 | 0.00393400  |
| H  | 1.18841000  | 2.62075300  | -0.32415700 |
| C  | 3.24051100  | -1.46745300 | -0.72737000 |
| C  | 3.18384700  | 0.26934300  | 1.64104600  |
| Au | 0.03140000  | -0.27927200 | 0.18225600  |
| C  | 4.50563000  | -1.89434700 | -0.29617800 |
| C  | 2.59349900  | -2.16114000 | -1.76329100 |
| C  | 4.24382800  | 1.17149300  | 1.81561200  |

|                  |            |             |             |
|------------------|------------|-------------|-------------|
| C                | 2.70578100 | -0.45703900 | 2.74431600  |
| C                | 5.11573800 | -2.99539800 | -0.90042900 |
| H                | 5.01177100 | -1.37438200 | 0.51130700  |
| C                | 3.20998500 | -3.25620100 | -2.36731000 |
| H                | 1.60749200 | -1.84476900 | -2.09469100 |
| C                | 4.82046500 | 1.33655500  | 3.07656700  |
| H                | 4.61503100 | 1.74801300  | 0.97415600  |
| C                | 3.28852000 | -0.29200700 | 3.99995600  |
| H                | 1.87749700 | -1.15031800 | 2.61981500  |
| C                | 4.47125700 | -3.67496400 | -1.93570700 |
| H                | 6.09395400 | -3.32174000 | -0.55942600 |
| H                | 2.70415900 | -3.78610800 | -3.16932600 |
| C                | 4.34589700 | 0.60608100  | 4.16734800  |
| H                | 5.63878400 | 2.03907600  | 3.20492700  |
| H                | 2.91364300 | -0.85774300 | 4.84798200  |
| H                | 4.94813100 | -4.53198800 | -2.40251000 |
| H                | 4.79502200 | 0.73943300  | 5.14725900  |
| Ts <sub>2a</sub> |            |             |             |
| C                | 3.82511300 | 0.44158200  | -1.45425300 |
| C                | 4.00641500 | -0.99051100 | -0.91005700 |
| C                | 2.78006800 | -1.25620100 | 0.11715800  |
| C                | 4.31216400 | -1.11753200 | 0.54546600  |
| C                | 1.98654900 | -0.04096600 | 0.10271100  |
| C                | 2.81395900 | 1.12214100  | -0.50551200 |
| C                | 5.11697900 | 1.21105600  | -1.86094200 |
| C                | 4.76906400 | 2.61527000  | -2.39939800 |
| C                | 6.21986800 | 1.28590900  | -0.78608500 |
| C                | 4.42112400 | -2.04439200 | -1.91131300 |
| C                | 4.98387400 | -2.30368900 | 1.12827000  |
| C                | 5.73573800 | -2.24256000 | 2.23657500  |
| C                | 2.13891400 | -2.59185200 | 0.30688700  |
| C                | 1.45866600 | -3.25361500 | -0.63889100 |
| O                | 3.46913900 | 1.93982500  | 0.58648900  |
| C                | 2.98997100 | 1.69522400  | 1.82493400  |
| C                | 3.51164600 | 2.58183700  | 2.90349100  |
| O                | 2.15614900 | 0.76766200  | 1.99012900  |
| H                | 3.25182200 | 0.32841800  | -2.38895100 |
| H                | 4.55050600 | -0.20244200 | 1.07339100  |
| H                | 2.19204800 | 1.85512400  | -1.01610100 |
| H                | 5.53029800 | 0.63466200  | -2.70299000 |
| H                | 5.65751300 | 3.08443700  | -2.83451500 |
| H                | 4.00186900 | 2.57039200  | -3.18261800 |
| H                | 4.40846900 | 3.26961800  | -1.59755200 |
| H                | 7.11088800 | 1.75877900  | -1.21412500 |

|    |             |             |             |
|----|-------------|-------------|-------------|
| H  | 6.51579000  | 0.29388100  | -0.42911600 |
| H  | 5.90506900  | 1.88691100  | 0.07188500  |
| H  | 3.86126600  | -1.93468600 | -2.84660200 |
| H  | 5.48832700  | -1.93890800 | -2.14282200 |
| H  | 4.25807600  | -3.05912300 | -1.54374800 |
| H  | 4.86253400  | -3.25486500 | 0.61730500  |
| H  | 6.23598200  | -3.11920700 | 2.63329000  |
| H  | 5.88515600  | -1.31494600 | 2.78340500  |
| H  | 2.24389900  | -3.02816500 | 1.29914700  |
| H  | 1.00169700  | -4.21721400 | -0.43583900 |
| H  | 1.33509800  | -2.86112500 | -1.64480000 |
| H  | 3.27717800  | 2.15840800  | 3.87971500  |
| H  | 3.04161700  | 3.56909900  | 2.82008000  |
| H  | 4.59005100  | 2.72300900  | 2.79600800  |
| H  | -5.98765000 | -1.97107500 | 2.96562700  |
| C  | -5.03706400 | -1.45076400 | 2.91643400  |
| C  | -4.35458000 | -1.12074900 | 4.09316200  |
| C  | -4.49453800 | -1.11489600 | 1.67016500  |
| C  | -3.12443200 | -0.45486400 | 4.02669100  |
| H  | -4.77655200 | -1.38530400 | 5.05684500  |
| C  | -3.26310500 | -0.44467500 | 1.60408500  |
| H  | -5.02330600 | -1.38127800 | 0.76137400  |
| C  | -2.57564200 | -0.11794000 | 2.78475600  |
| H  | -2.59088300 | -0.20351200 | 4.93711700  |
| P  | -2.51162400 | 0.04647800  | -0.04152600 |
| H  | -1.61686200 | 0.38975300  | 2.73580500  |
| C  | -3.25425900 | -1.11092300 | -1.31775900 |
| C  | -3.16976600 | 1.75668700  | -0.44263400 |
| Au | -0.06695100 | -0.02580600 | 0.01517900  |
| C  | -4.35258400 | -0.73067600 | -2.10294400 |
| C  | -2.69288600 | -2.39042200 | -1.46469600 |
| C  | -4.27929100 | 2.29359000  | 0.22693200  |
| C  | -2.53042800 | 2.49885900  | -1.45015400 |
| C  | -4.88894600 | -1.63293800 | -3.03061200 |
| H  | -4.78519100 | 0.25834600  | -1.99951400 |
| C  | -3.23627100 | -3.28770800 | -2.38941400 |
| H  | -1.83771000 | -2.68265900 | -0.86247000 |
| C  | -4.74680600 | 3.56940700  | -0.11394700 |
| H  | -4.77453700 | 1.72916600  | 1.00928800  |
| C  | -3.00540300 | 3.76958000  | -1.78947900 |
| H  | -1.66811900 | 2.08711200  | -1.96639400 |
| C  | -4.33389800 | -2.90940900 | -3.17339300 |
| H  | -5.73727500 | -1.33655700 | -3.63830100 |
| H  | -2.80347900 | -4.27637100 | -2.50001000 |



|    |             |             |             |
|----|-------------|-------------|-------------|
| C  | -4.11311100 | 4.30625400  | -1.12057300 |
| H  | -5.60327200 | 3.98344000  | 0.40739400  |
| H  | -2.51180600 | 4.33922100  | -2.56977000 |
| H  | -4.75190400 | -3.60527300 | -3.89294900 |
| H  | -4.47807900 | 5.29385100  | -1.38165000 |
| 3a |             |             |             |
| C  | -3.57833700 | 0.64435400  | 1.35906600  |
| C  | -3.75072100 | -0.84208700 | 0.99391100  |
| C  | -2.76040000 | -1.17111300 | -0.13493000 |
| C  | -4.28245600 | -1.13496500 | -0.39972100 |
| C  | -1.99451200 | 0.10439600  | -0.46471800 |
| C  | -2.74801300 | 1.25965100  | 0.22709700  |
| C  | -4.82171200 | 1.41687000  | 1.87930500  |
| C  | -4.46167100 | 2.86726600  | 2.24449800  |
| C  | -6.06348200 | 1.36563800  | 0.97397000  |
| C  | -4.06535600 | -1.76330100 | 2.15563500  |
| C  | -5.01516600 | -2.38518100 | -0.71670000 |
| C  | -6.07764200 | -2.43428400 | -1.52537600 |
| C  | -2.04149700 | -2.47415400 | -0.29764300 |
| C  | -1.44075700 | -3.16505600 | 0.67502900  |
| O  | -3.54546300 | 1.88817600  | -0.89461900 |
| C  | -3.13941700 | 1.38693300  | -2.01411400 |
| C  | -3.65881800 | 1.91173000  | -3.30307000 |
| O  | -2.27134500 | 0.45994900  | -1.96138200 |
| H  | -2.86390200 | 0.65477300  | 2.19848300  |
| H  | -4.67469000 | -0.28662100 | -0.95394300 |
| H  | -2.12864900 | 2.09086900  | 0.55923700  |
| H  | -5.09158500 | 0.90812700  | 2.81502100  |
| H  | -5.29779200 | 3.34803000  | 2.76282000  |
| H  | -3.59002300 | 2.91613500  | 2.90888300  |
| H  | -4.24524400 | 3.46792500  | 1.35236100  |
| H  | -6.90272800 | 1.85627000  | 1.47922300  |
| H  | -6.36879900 | 0.33846500  | 0.75189600  |
| H  | -5.90284800 | 1.89100800  | 0.02653500  |
| H  | -3.37695500 | -1.58835300 | 2.99155500  |
| H  | -5.08343100 | -1.58243100 | 2.51971200  |
| H  | -3.99667000 | -2.81724600 | 1.88186900  |
| H  | -4.65129900 | -3.30409400 | -0.26308300 |
| H  | -6.59111700 | -3.36825300 | -1.73139100 |
| H  | -6.47837900 | -1.54473300 | -2.00765500 |
| H  | -2.01225000 | -2.86308500 | -1.31628700 |
| H  | -0.92703800 | -4.09932800 | 0.46579200  |
| H  | -1.44057000 | -2.82915800 | 1.70853900  |
| H  | -3.46040400 | 1.20207700  | -4.10693200 |

|                  |             |             |             |
|------------------|-------------|-------------|-------------|
| H                | -3.15402700 | 2.85961000  | -3.52715100 |
| H                | -4.72907800 | 2.11635400  | -3.21842600 |
| H                | 5.92614900  | -3.26262100 | -1.37679300 |
| C                | 5.03580100  | -2.71082600 | -1.66397100 |
| C                | 4.49448300  | -2.86883900 | -2.94130600 |
| C                | 4.43414700  | -1.84602700 | -0.74798900 |
| C                | 3.34538100  | -2.16245600 | -3.30516800 |
| H                | 4.96377800  | -3.54480800 | -3.65023000 |
| C                | 3.28111500  | -1.13167500 | -1.10848300 |
| H                | 4.85891500  | -1.73409700 | 0.24483400  |
| C                | 2.73733800  | -1.30094800 | -2.39263900 |
| H                | 2.91852200  | -2.28761200 | -4.29606000 |
| P                | 2.47208600  | 0.03782100  | 0.04511700  |
| H                | 1.83744900  | -0.76111100 | -2.67704000 |
| C                | 2.98273200  | -0.45641800 | 1.73311200  |
| C                | 3.21657900  | 1.68376500  | -0.26248100 |
| Au               | 0.09908300  | 0.05889600  | -0.21680700 |
| C                | 4.05817200  | 0.15586700  | 2.39352700  |
| C                | 2.28165900  | -1.49508000 | 2.36856700  |
| C                | 4.39768900  | 1.84048000  | -1.00223400 |
| C                | 2.58359300  | 2.81704400  | 0.27565800  |
| C                | 4.42808400  | -0.27006800 | 3.67103400  |
| H                | 4.60376200  | 0.96433600  | 1.91711800  |
| C                | 2.65977200  | -1.92024000 | 3.64131500  |
| H                | 1.44310100  | -1.97105500 | 1.86584800  |
| C                | 4.93718800  | 3.11407300  | -1.19735000 |
| H                | 4.89518800  | 0.97486600  | -1.42785700 |
| C                | 3.13095700  | 4.08471700  | 0.08518300  |
| H                | 1.66524000  | 2.70526300  | 0.84713700  |
| C                | 3.73201800  | -1.30670700 | 4.29484000  |
| H                | 5.26021800  | 0.21052700  | 4.17727700  |
| H                | 2.11520700  | -2.72588400 | 4.12535000  |
| C                | 4.30752700  | 4.23487500  | -0.65432000 |
| H                | 5.85034700  | 3.22727200  | -1.77441600 |
| H                | 2.63797300  | 4.95509900  | 0.50867800  |
| H                | 4.02163300  | -1.63462600 | 5.28897500  |
| H                | 4.72996700  | 5.22363500  | -0.80805800 |
| Ts <sub>3a</sub> |             |             |             |
| C                | 3.19104700  | -0.74726400 | 1.36080800  |
| C                | 3.47211100  | 0.75202400  | 1.11676800  |
| C                | 2.78409300  | 1.15171400  | -0.19309600 |
| C                | 4.31915100  | 1.07252100  | -0.11618300 |
| C                | 2.08030900  | -0.10551800 | -0.69791200 |
| C                | 2.56959200  | -1.22469100 | 0.07974700  |

|   |             |             |             |
|---|-------------|-------------|-------------|
| C | 4.30032500  | -1.61999700 | 2.02854000  |
| C | 3.83072500  | -3.07474900 | 2.19289200  |
| C | 5.68027700  | -1.55564300 | 1.35796400  |
| C | 3.53741500  | 1.61648800  | 2.35915700  |
| C | 5.13791900  | 2.30703300  | -0.19123400 |
| C | 6.36140300  | 2.34820700  | -0.72730800 |
| C | 2.13832700  | 2.47254800  | -0.47104600 |
| C | 1.30884100  | 3.12322500  | 0.34964600  |
| O | 3.82113600  | -1.79707700 | -1.35414700 |
| C | 3.30416100  | -1.20496700 | -2.31542100 |
| C | 3.76384100  | -1.35499600 | -3.73011800 |
| O | 2.28990600  | -0.37128400 | -2.12594400 |
| H | 2.34516200  | -0.80879800 | 2.07121100  |
| H | 4.79541500  | 0.22782900  | -0.60155100 |
| H | 2.14741200  | -2.21892400 | 0.00534700  |
| H | 4.40948800  | -1.19585800 | 3.03582500  |
| H | 4.53180200  | -3.62905500 | 2.82514700  |
| H | 2.84182200  | -3.13733200 | 2.66427300  |
| H | 3.78545900  | -3.59478400 | 1.22827300  |
| H | 6.39040200  | -2.15518900 | 1.93827900  |
| H | 6.06971200  | -0.53417000 | 1.31737800  |
| H | 5.65894900  | -1.96014600 | 0.34108000  |
| H | 2.66986700  | 1.43649700  | 3.00686300  |
| H | 4.43880400  | 1.38809200  | 2.94000800  |
| H | 3.55890200  | 2.68180000  | 2.12314000  |
| H | 4.70381200  | 3.22150600  | 0.20728200  |
| H | 6.93379100  | 3.26991100  | -0.76521300 |
| H | 6.83832100  | 1.46296700  | -1.14320800 |
| H | 2.37420400  | 2.90997100  | -1.44182600 |
| H | 0.86502400  | 4.07392800  | 0.06775100  |
| H | 1.04434000  | 2.73603600  | 1.33012900  |
| H | 4.42490400  | -0.51443900 | -3.97351100 |
| H | 2.90913200  | -1.31604000 | -4.40955600 |
| H | 4.31634200  | -2.28726500 | -3.85065900 |
| H | -5.44583600 | 3.70772400  | 1.30525000  |
| C | -4.63098700 | 3.38859400  | 0.66204600  |
| C | -4.09130700 | 4.27049300  | -0.27624900 |
| C | -4.12490900 | 2.09288300  | 0.78038700  |
| C | -3.03897700 | 3.85876100  | -1.09825400 |
| H | -4.48670700 | 5.27824400  | -0.36439100 |
| C | -3.06980000 | 1.67353800  | -0.04463800 |
| H | -4.54811100 | 1.41517500  | 1.51531700  |
| C | -2.52511900 | 2.56781000  | -0.98112300 |
| H | -2.61477800 | 4.54400200  | -1.82639300 |

|    |             |             |             |
|----|-------------|-------------|-------------|
| P  | -2.40156000 | -0.02728600 | 0.04364000  |
| H  | -1.69924200 | 2.25609000  | -1.61543600 |
| C  | -2.84988400 | -0.68606600 | 1.69209400  |
| C  | -3.31023500 | -1.02568900 | -1.19197900 |
| Au | -0.05206400 | -0.07622400 | -0.31944000 |
| C  | -3.97053100 | -1.50844100 | 1.88017200  |
| C  | -2.05714900 | -0.33363400 | 2.79736000  |
| C  | -4.52635100 | -0.59090400 | -1.73995500 |
| C  | -2.78026000 | -2.26769400 | -1.58034100 |
| C  | -4.29368900 | -1.96672700 | 3.15941100  |
| H  | -4.58795600 | -1.79357400 | 1.03425100  |
| C  | -2.38839300 | -0.78856300 | 4.07246700  |
| H  | -1.18389400 | 0.29958200  | 2.65947000  |
| C  | -5.20346300 | -1.39312400 | -2.66079300 |
| H  | -4.94294700 | 0.36964400  | -1.45403000 |
| C  | -3.46445500 | -3.06689600 | -2.49471900 |
| H  | -1.83447300 | -2.60851700 | -1.16611000 |
| C  | -3.50624300 | -1.60774700 | 4.25439200  |
| H  | -5.16141300 | -2.60514200 | 3.29725700  |
| H  | -1.77318500 | -0.50875700 | 4.92277700  |
| C  | -4.67592200 | -2.62930100 | -3.03723300 |
| H  | -6.14263500 | -1.04897200 | -3.08390000 |
| H  | -3.05004100 | -4.02689200 | -2.78854200 |
| H  | -3.76018400 | -1.96692600 | 5.24740300  |
| H  | -5.20470200 | -3.24968800 | -3.75495100 |
| 4a |             |             |             |
| C  | 1.15209100  | -1.10135600 | 0.64989900  |
| C  | 1.18892200  | 0.44479200  | 0.72995400  |
| C  | -0.18580200 | 0.95764700  | 0.26685800  |
| C  | 1.08635500  | 1.24320300  | -0.56497300 |
| C  | -0.87277200 | -0.28222400 | -0.21548900 |
| C  | -0.14438800 | -1.39262000 | -0.07855500 |
| C  | 2.43121700  | -1.81706500 | 0.13150000  |
| C  | 2.32848100  | -3.33360200 | 0.36909900  |
| C  | 2.79334500  | -1.52765900 | -1.33274100 |
| C  | 1.89247000  | 1.01970600  | 1.94244200  |
| C  | 1.65353800  | 2.60292100  | -0.69738600 |
| C  | 2.14414000  | 3.09285900  | -1.84076300 |
| C  | -0.94734900 | 2.03289200  | 0.95071700  |
| C  | -2.03861700 | 1.83560900  | 1.69754700  |
| O  | -2.09538300 | -0.15727600 | -0.86064800 |
| C  | -3.20060500 | -0.80764700 | -0.37356100 |
| C  | -4.39101700 | -0.50128300 | -1.24857600 |
| O  | -3.20247500 | -1.50056200 | 0.61317700  |

|                  |             |             |             |
|------------------|-------------|-------------|-------------|
| H                | 1.03462100  | -1.45452100 | 1.68915500  |
| H                | 1.12507200  | 0.67616500  | -1.49037700 |
| H                | -0.44510700 | -2.37750400 | -0.41563700 |
| H                | 3.25844600  | -1.44766400 | 0.75586400  |
| H                | 3.27513500  | -3.82947500 | 0.12487500  |
| H                | 2.08866500  | -3.56282000 | 1.41429400  |
| H                | 1.55117100  | -3.78672500 | -0.25869100 |
| H                | 3.66934500  | -2.11758000 | -1.62819600 |
| H                | 3.03729500  | -0.47408900 | -1.49452300 |
| H                | 1.97158300  | -1.79486400 | -2.00871000 |
| H                | 1.49868900  | 0.56653600  | 2.85995400  |
| H                | 2.96988900  | 0.81513400  | 1.90185200  |
| H                | 1.76561800  | 2.10079800  | 2.03735900  |
| H                | 1.67561400  | 3.23588300  | 0.18757700  |
| H                | 2.55706400  | 4.09575700  | -1.89936100 |
| H                | 2.15173700  | 2.50838400  | -2.75835200 |
| H                | -0.58058900 | 3.04899300  | 0.81534700  |
| H                | -2.55484400 | 2.66935600  | 2.16546300  |
| H                | -2.45084000 | 0.84477300  | 1.87237700  |
| H                | -4.59526200 | 0.57441900  | -1.22990800 |
| H                | -5.26014100 | -1.05056200 | -0.88559900 |
| H                | -4.17867500 | -0.77501800 | -2.28693800 |
| Ts <sub>4a</sub> |             |             |             |
| C                | -0.81298600 | -1.31809700 | -0.72933300 |
| C                | 0.67451200  | -1.36434700 | -0.45078800 |
| C                | -1.59656500 | -2.49182900 | -0.06436600 |
| C                | -1.43535000 | -2.64962500 | 1.45724300  |
| C                | -3.08419200 | -2.52630100 | -0.44546200 |
| C                | -1.20990500 | 0.18650400  | -0.47767800 |
| C                | 0.12611500  | 0.92074200  | -0.43093000 |
| C                | 1.15749200  | -0.12076900 | -0.30001700 |
| O                | 2.44543500  | 0.33320900  | -0.07071100 |
| C                | 3.51903000  | -0.50423500 | 0.05454600  |
| C                | 4.77008300  | 0.31096400  | 0.27693200  |
| O                | 3.46297400  | -1.70821500 | -0.00451600 |
| C                | -1.25353400 | 0.57090900  | 0.98705700  |
| C                | -1.66224500 | 1.75979400  | 1.60028500  |
| C                | -2.17149200 | 2.90377600  | 1.00746200  |
| C                | -0.46802000 | 3.33325300  | -0.66258500 |
| C                | 0.42235100  | 2.29335800  | -0.47480800 |
| C                | -2.31304700 | 0.63148700  | -1.43842900 |
| H                | 1.24735500  | -2.27804200 | -0.40867200 |
| H                | -1.13508900 | -3.38458800 | -0.51462500 |
| H                | -1.80421400 | -3.63478500 | 1.76729100  |

|    |             |             |             |
|----|-------------|-------------|-------------|
| H  | -0.38705400 | -2.57401200 | 1.76737000  |
| H  | -2.01048800 | -1.89994900 | 2.01038100  |
| H  | -3.53898300 | -3.46798700 | -0.11565600 |
| H  | -3.22990100 | -2.44725500 | -1.52923800 |
| H  | -3.64088500 | -1.71256800 | 0.03375000  |
| H  | 4.93900000  | 0.98077500  | -0.57278700 |
| H  | 5.62125800  | -0.36026300 | 0.39455000  |
| H  | 4.66106900  | 0.93608400  | 1.16918400  |
| H  | -0.77089000 | -0.14395100 | 1.64155700  |
| H  | -1.32961500 | 1.85982600  | 2.63452000  |
| H  | -2.81107400 | 2.86727700  | 0.13879300  |
| H  | -2.28091100 | 3.80150200  | 1.61011200  |
| H  | -1.33049100 | 3.23587400  | -1.30370000 |
| H  | -0.11710400 | 4.35287900  | -0.52786100 |
| H  | 1.42798000  | 2.54695000  | -0.14259300 |
| H  | -2.56143500 | 1.68835400  | -1.37333000 |
| H  | -3.23234000 | 0.07062400  | -1.24907900 |
| H  | -2.00435800 | 0.43136200  | -2.47088400 |
| H  | -0.95259000 | -1.48155900 | -1.81205100 |
| 5a |             |             |             |
| C  | -0.56658700 | 1.49205200  | 0.65676400  |
| C  | 0.92762900  | 1.26852800  | 0.58180500  |
| C  | -1.00108600 | 2.47407900  | -0.48716000 |
| C  | -0.99699000 | 1.85438200  | -1.89242000 |
| C  | -2.30911200 | 3.23470300  | -0.20171800 |
| C  | -1.13386600 | 0.00910400  | 0.72387100  |
| C  | -0.01350800 | -0.81441900 | 0.07136200  |
| C  | 1.19888300  | 0.00414600  | 0.22236600  |
| O  | 2.40232100  | -0.62717500 | -0.04538400 |
| C  | 3.60824000  | 0.01414000  | 0.00448500  |
| C  | 4.70822100  | -0.95301300 | -0.36284200 |
| O  | 3.76060400  | 1.17422500  | 0.30020500  |
| C  | -2.52231300 | -0.19947500 | 0.15207100  |
| C  | -3.09413600 | -1.36724800 | -0.16215500 |
| C  | -2.46015100 | -2.73560600 | -0.06401000 |
| C  | -1.17236300 | -2.91329400 | -0.88287400 |
| C  | -0.02048200 | -2.00393600 | -0.55119900 |
| C  | -1.19826800 | -0.35914400 | 2.23914100  |
| H  | 1.65140900  | 2.05629700  | 0.72761800  |
| H  | -0.21317900 | 3.24269700  | -0.48222700 |
| H  | -1.17690300 | 2.62874900  | -2.64802200 |
| H  | -0.03369100 | 1.38521500  | -2.11676500 |
| H  | -1.77486800 | 1.09191300  | -2.00358800 |
| H  | -2.41773000 | 4.07017100  | -0.90396800 |

|                  |             |             |             |
|------------------|-------------|-------------|-------------|
| H                | -2.31402800 | 3.65199000  | 0.81269600  |
| H                | -3.20221900 | 2.61098200  | -0.31055100 |
| H                | 4.70131100  | -1.81004800 | 0.31853200  |
| H                | 5.67005900  | -0.44234300 | -0.30841700 |
| H                | 4.54875300  | -1.33899200 | -1.37517200 |
| H                | -3.14262600 | 0.68844600  | 0.08134300  |
| H                | -4.12924700 | -1.34028400 | -0.50139400 |
| H                | -2.24131700 | -2.97089500 | 0.98725000  |
| H                | -3.18292300 | -3.49065200 | -0.39459900 |
| H                | -0.83249900 | -3.95383200 | -0.77727000 |
| H                | -1.41047000 | -2.79609800 | -1.95250300 |
| H                | 0.94411400  | -2.35196200 | -0.91925300 |
| H                | -1.46183800 | -1.41101700 | 2.37862500  |
| H                | -1.95601000 | 0.25203200  | 2.74261900  |
| H                | -0.23233200 | -0.17920300 | 2.72341400  |
| H                | -0.82181300 | 2.00044100  | 1.59814000  |
| Ts <sub>1b</sub> |             |             |             |
| C                | -5.22889300 | -0.65437600 | -0.13809700 |
| C                | -5.80326700 | 0.78149900  | -0.07112900 |
| C                | -5.09878200 | 1.79118000  | 0.49884000  |
| C                | -2.61035300 | -0.33448200 | -0.62588200 |
| C                | -4.00152800 | -0.42973700 | -0.98107700 |
| C                | -5.26567500 | -1.38742100 | 1.24162900  |
| C                | -5.20138100 | -2.92370400 | 1.13335500  |
| C                | -4.30413400 | -0.88300600 | 2.32926300  |
| C                | -1.69245900 | 0.63381600  | -0.90909400 |
| C                | -7.15924200 | 0.93179600  | -0.71130500 |
| C                | -5.52248500 | 3.17257300  | 0.66900400  |
| C                | -4.75528400 | 4.09544300  | 1.27243800  |
| C                | -2.14416800 | 1.87153400  | -1.53371200 |
| C                | -1.32258000 | 2.87877600  | -1.88336700 |
| O                | -3.60882300 | -2.36895400 | -1.59275100 |
| C                | -2.64996900 | -2.58398700 | -0.84608900 |
| C                | -1.95883200 | -3.90027000 | -0.69650600 |
| O                | -2.13665400 | -1.58391800 | -0.11521800 |
| H                | -5.91432900 | -1.20992700 | -0.79090200 |
| H                | -4.11003500 | 1.57159900  | 0.89515400  |
| H                | -4.25617800 | 0.04730600  | -1.92549900 |
| H                | -6.28125800 | -1.15726600 | 1.59325900  |
| H                | -5.61277100 | -3.36864500 | 2.04551800  |
| H                | -5.77803000 | -3.30716800 | 0.28480100  |
| H                | -4.17507100 | -3.29447600 | 1.04475300  |
| H                | -4.48944800 | -1.43854600 | 3.25530800  |
| H                | -4.45307100 | 0.17560400  | 2.55520200  |

|    |             |             |             |
|----|-------------|-------------|-------------|
| H  | -3.25446800 | -1.03890000 | 2.06092400  |
| H  | -7.11459500 | 0.69402000  | -1.78343900 |
| H  | -7.87335400 | 0.22644000  | -0.26547500 |
| H  | -7.57253400 | 1.93679100  | -0.61289000 |
| H  | -6.50077700 | 3.46524100  | 0.29690600  |
| H  | -5.08878300 | 5.12099300  | 1.39517300  |
| H  | -3.77046400 | 3.85171900  | 1.66517800  |
| H  | -3.20697600 | 1.99681400  | -1.74144500 |
| H  | -1.70240200 | 3.76589800  | -2.38198200 |
| H  | -0.25528900 | 2.84275700  | -1.68180700 |
| H  | -1.02529300 | -3.87247100 | -1.27163500 |
| H  | -2.59191500 | -4.70253200 | -1.07589900 |
| H  | -1.69863100 | -4.07284400 | 0.35116300  |
| H  | 5.09876300  | -0.36637900 | 4.43065100  |
| C  | 4.21618600  | -0.65877500 | 3.86918000  |
| C  | 3.27210400  | -1.51355200 | 4.44184000  |
| C  | 4.02837100  | -0.17191900 | 2.57447600  |
| C  | 2.13389400  | -1.88092600 | 3.71997900  |
| H  | 3.41974900  | -1.88760500 | 5.45082400  |
| C  | 2.88911400  | -0.54098400 | 1.84267600  |
| H  | 4.76307500  | 0.49843900  | 2.13914100  |
| C  | 1.93915800  | -1.39389800 | 2.42779700  |
| H  | 1.39422600  | -2.53921200 | 4.16661200  |
| P  | 2.61286200  | 0.04274700  | 0.12849200  |
| H  | 1.04625600  | -1.67089000 | 1.87265600  |
| C  | 3.56970700  | 1.59569900  | -0.04875000 |
| C  | 3.40485000  | -1.18469500 | -0.97959100 |
| Au | 0.30076400  | 0.34971500  | -0.39753900 |
| C  | 4.84922800  | 1.62184300  | -0.62284600 |
| C  | 2.99705300  | 2.79098500  | 0.41803900  |
| C  | 4.36572800  | -2.09649700 | -0.51776400 |
| C  | 3.03989100  | -1.19463800 | -2.33661400 |
| C  | 5.54598200  | 2.82807300  | -0.72342600 |
| H  | 5.30018100  | 0.70766900  | -0.99598700 |
| C  | 3.69999900  | 3.99100900  | 0.32090200  |
| H  | 2.00297900  | 2.78124200  | 0.85882500  |
| C  | 4.95551900  | -3.00029400 | -1.40409000 |
| H  | 4.65112500  | -2.10630200 | 0.52947100  |
| C  | 3.63685200  | -2.09471000 | -3.21845100 |
| H  | 2.28949600  | -0.49786800 | -2.70227800 |
| C  | 4.97460000  | 4.01102000  | -0.25198600 |
| H  | 6.53497700  | 2.84100000  | -1.17225300 |
| H  | 3.25152900  | 4.91024000  | 0.68659300  |
| C  | 4.59431200  | -2.99978800 | -2.75255200 |



|    |             |             |             |
|----|-------------|-------------|-------------|
| H  | 5.69709100  | -3.70464900 | -1.03833400 |
| H  | 3.35170000  | -2.09256800 | -4.26657300 |
| H  | 5.51871500  | 4.94751900  | -0.33344900 |
| H  | 5.05527800  | -3.70429900 | -3.43886400 |
| 2b |             |             |             |
| C  | -5.15993500 | -0.63389300 | -0.00961700 |
| C  | -5.62535600 | 0.78608400  | -0.36877300 |
| C  | -5.58401300 | 1.81068400  | 0.51074500  |
| C  | -2.53597600 | -0.72419500 | -0.69236100 |
| C  | -3.99922100 | -1.03547000 | -0.96708800 |
| C  | -5.01163700 | -0.94612500 | 1.51317000  |
| C  | -5.31978400 | -2.41875800 | 1.84646900  |
| C  | -3.70032300 | -0.51704600 | 2.19906000  |
| C  | -1.71905300 | 0.33128300  | -0.79006600 |
| C  | -6.19212300 | 0.93386500  | -1.76847000 |
| C  | -6.03282100 | 3.17890000  | 0.28832300  |
| C  | -5.94565900 | 4.13553700  | 1.22602200  |
| C  | -2.28657000 | 1.61660800  | -1.20525500 |
| C  | -1.57168200 | 2.73625400  | -1.40271700 |
| O  | -3.95697800 | -2.54371900 | -1.04177900 |
| C  | -2.79755900 | -2.94730100 | -0.64892600 |
| C  | -2.47858200 | -4.38709500 | -0.51689400 |
| O  | -1.94862600 | -2.02846800 | -0.38203200 |
| H  | -5.97762100 | -1.28277400 | -0.36249900 |
| H  | -5.17805800 | 1.63575500  | 1.50331300  |
| H  | -4.27621500 | -0.73795700 | -1.98028800 |
| H  | -5.82142700 | -0.36805900 | 1.97364800  |
| H  | -5.40490700 | -2.54532500 | 2.93107700  |
| H  | -6.26273800 | -2.75020500 | 1.39776500  |
| H  | -4.53102900 | -3.10261300 | 1.51026600  |
| H  | -3.83277300 | -0.55316400 | 3.28622100  |
| H  | -3.38455200 | 0.49446500  | 1.93215400  |
| H  | -2.86976000 | -1.19028500 | 1.95958300  |
| H  | -6.70932000 | 0.01945600  | -2.08494800 |
| H  | -6.91671000 | 1.74829700  | -1.83117000 |
| H  | -5.41904700 | 1.14249000  | -2.52286700 |
| H  | -6.45056600 | 3.43587700  | -0.68203300 |
| H  | -6.28674600 | 5.14898000  | 1.03953900  |
| H  | -5.53176900 | 3.93448200  | 2.21176700  |
| H  | -3.36248400 | 1.67269200  | -1.36300800 |
| H  | -2.04970800 | 3.65590500  | -1.72737700 |
| H  | -0.49618600 | 2.76681900  | -1.24878000 |
| H  | -1.40773100 | -4.52457900 | -0.36455100 |
| H  | -2.81055000 | -4.91702100 | -1.41502100 |

|                  |             |             |             |
|------------------|-------------|-------------|-------------|
| H                | -3.02971300 | -4.80376000 | 0.33485400  |
| H                | 5.28326200  | -0.36161900 | 4.30542400  |
| C                | 4.43628900  | -0.72142600 | 3.72845200  |
| C                | 3.63425800  | -1.74981800 | 4.22723800  |
| C                | 4.15085800  | -0.14674300 | 2.48867100  |
| C                | 2.54097800  | -2.20427900 | 3.48581400  |
| H                | 3.85693400  | -2.19202900 | 5.19402400  |
| C                | 3.05631900  | -0.60171700 | 1.73707300  |
| H                | 4.77401200  | 0.65863700  | 2.11209000  |
| C                | 2.24943000  | -1.63064000 | 2.24862700  |
| H                | 1.91147700  | -2.99934800 | 3.87527700  |
| P                | 2.65785100  | 0.09818400  | 0.09072700  |
| H                | 1.39108800  | -1.97683800 | 1.67837100  |
| C                | 3.39739100  | 1.77553700  | 0.06167900  |
| C                | 3.58206700  | -0.89969900 | -1.13873800 |
| Au               | 0.31588900  | 0.17406100  | -0.36842300 |
| C                | 4.64615200  | 2.03272100  | -0.52268100 |
| C                | 2.68375700  | 2.82839400  | 0.65903400  |
| C                | 4.68430800  | -1.69061300 | -0.78114000 |
| C                | 3.17464200  | -0.85095500 | -2.48255100 |
| C                | 5.17405000  | 3.32562500  | -0.50331800 |
| H                | 5.20390800  | 1.23059400  | -0.99568200 |
| C                | 3.21836500  | 4.11572200  | 0.68064700  |
| H                | 1.71183900  | 2.63910100  | 1.10850800  |
| C                | 5.37098800  | -2.41620400 | -1.75677300 |
| H                | 5.00492800  | -1.74527100 | 0.25451600  |
| C                | 3.86830300  | -1.57212700 | -3.45376100 |
| H                | 2.31553300  | -0.24856400 | -2.76761400 |
| C                | 4.46359500  | 4.36598900  | 0.09761700  |
| H                | 6.14044200  | 3.51786000  | -0.96041100 |
| H                | 2.66138600  | 4.92349100  | 1.14659700  |
| C                | 4.96625700  | -2.35681700 | -3.09156100 |
| H                | 6.22209600  | -3.02786200 | -1.47151600 |
| H                | 3.54883500  | -1.52535500 | -4.49088800 |
| H                | 4.87654700  | 5.37053600  | 0.10875900  |
| H                | 5.50290000  | -2.92256900 | -3.84776200 |
| Ts <sub>2b</sub> |             |             |             |
| C                | -4.87223400 | -0.67216600 | 0.20546400  |
| C                | -5.41184600 | 0.74836500  | -0.01222600 |
| C                | -4.91486300 | 1.82101900  | 0.64227700  |
| C                | -2.59238400 | -0.25639200 | -1.00473600 |
| C                | -3.88482700 | -0.97228000 | -0.96853600 |
| C                | -4.45514700 | -1.03565800 | 1.67006300  |
| C                | -4.77960000 | -2.50643500 | 1.99573000  |

|   |             |             |             |
|---|-------------|-------------|-------------|
| C | -3.01592200 | -0.71373600 | 2.11520800  |
| C | -1.80781400 | 0.72712000  | -1.18792500 |
| C | -6.56414500 | 0.82005300  | -0.98875400 |
| C | -5.35704500 | 3.20621100  | 0.54343300  |
| C | -4.79692900 | 4.20259700  | 1.24729900  |
| C | -2.09552300 | 2.05104600  | -1.76094700 |
| C | -1.19512400 | 3.02341800  | -1.95320200 |
| O | -3.72192400 | -2.40184800 | -1.17463100 |
| C | -2.50744500 | -2.86801500 | -0.89338100 |
| C | -2.36768400 | -4.35305300 | -1.03249700 |
| O | -1.61786500 | -2.09753100 | -0.53983200 |
| H | -5.71365700 | -1.33909100 | -0.03052600 |
| H | -4.10239400 | 1.66577500  | 1.34736400  |
| H | -4.39409100 | -0.64441800 | -1.88424000 |
| H | -5.12466700 | -0.42681400 | 2.29004700  |
| H | -4.60514400 | -2.70700800 | 3.05838500  |
| H | -5.82688600 | -2.74580400 | 1.78014700  |
| H | -4.15566500 | -3.20527100 | 1.42613400  |
| H | -2.94089700 | -0.84976800 | 3.19998700  |
| H | -2.70745600 | 0.31075800  | 1.89176100  |
| H | -2.28378600 | -1.38230600 | 1.65312500  |
| H | -7.45455300 | 0.33385800  | -0.56657000 |
| H | -6.83993400 | 1.84109300  | -1.25726200 |
| H | -6.34332400 | 0.28799900  | -1.92540000 |
| H | -6.18186700 | 3.44050700  | -0.12496100 |
| H | -5.14548200 | 5.22701700  | 1.16194800  |
| H | -3.97585800 | 4.02285900  | 1.93810100  |
| H | -3.13363700 | 2.22732000  | -2.03351500 |
| H | -1.49616000 | 3.97298400  | -2.38542900 |
| H | -0.14792600 | 2.90844200  | -1.68885500 |
| H | -1.31237400 | -4.62419500 | -1.07133100 |
| H | -2.88906000 | -4.69893200 | -1.92877700 |
| H | -2.83391100 | -4.83912300 | -0.16737400 |
| H | 4.45837100  | -1.19153400 | 4.51031000  |
| C | 3.69720800  | -1.42013300 | 3.77011100  |
| C | 2.82807000  | -2.49490600 | 3.96636100  |
| C | 3.58981000  | -0.63079800 | 2.62355000  |
| C | 1.84522400  | -2.78225100 | 3.01546400  |
| H | 2.91274000  | -3.10474400 | 4.86113700  |
| C | 2.60609200  | -0.91793400 | 1.66481700  |
| H | 4.26499700  | 0.20728700  | 2.48124400  |
| C | 1.72890200  | -1.99591100 | 1.87002500  |
| H | 1.16489700  | -3.61471900 | 3.17025500  |
| P | 2.45157300  | 0.06164100  | 0.12779300  |

|    |             |             |             |
|----|-------------|-------------|-------------|
| H  | 0.95548400  | -2.21417500 | 1.13763500  |
| C  | 3.25501300  | 1.67596700  | 0.43620800  |
| C  | 3.43244800  | -0.79537600 | -1.15685700 |
| Au | 0.20430600  | 0.32446900  | -0.52130300 |
| C  | 4.56597800  | 1.94094400  | 0.01328900  |
| C  | 2.53677800  | 2.66430100  | 1.13043400  |
| C  | 4.46247100  | -1.68701100 | -0.81972000 |
| C  | 3.15743200  | -0.53369700 | -2.50940900 |
| C  | 5.15004800  | 3.17976200  | 0.28654800  |
| H  | 5.12842800  | 1.18921100  | -0.53131500 |
| C  | 3.12782900  | 3.89638000  | 1.40498400  |
| H  | 1.51756000  | 2.46899800  | 1.45521400  |
| C  | 5.21010600  | -2.30176700 | -1.82577200 |
| H  | 4.67833000  | -1.90607100 | 0.22131000  |
| C  | 3.91081800  | -1.14743400 | -3.50921300 |
| H  | 2.35364400  | 0.14663500  | -2.77947600 |
| C  | 4.43430000  | 4.15602800  | 0.98125100  |
| H  | 6.16393700  | 3.38021000  | -0.04715900 |
| H  | 2.56747900  | 4.65532200  | 1.94314600  |
| C  | 4.93676900  | -2.03270300 | -3.16827300 |
| H  | 6.00429200  | -2.99268200 | -1.55840500 |
| H  | 3.69268300  | -0.93984300 | -4.55268800 |
| H  | 4.89087400  | 5.11924800  | 1.18946500  |
| H  | 5.51896600  | -2.51494700 | -3.94812600 |
| 3b |             |             |             |
| C  | -5.12823500 | -0.75463800 | -0.12141600 |
| C  | -5.11423900 | 0.56180100  | -0.89111100 |
| C  | -5.91854800 | 1.60106200  | -0.56697500 |
| C  | -2.49007800 | -1.07788600 | 0.26014800  |
| C  | -3.81982000 | -1.44160800 | 0.14513900  |
| C  | -6.08243400 | -0.88652800 | 1.12978200  |
| C  | -6.39906500 | -2.35667500 | 1.45735900  |
| C  | -5.58445500 | -0.15544200 | 2.38564800  |
| C  | -1.83474300 | 0.16709500  | 0.44370800  |
| C  | -4.23221400 | 0.56086500  | -2.12300000 |
| C  | -6.05534600 | 2.85537100  | -1.29315800 |
| C  | -6.87479000 | 3.84283600  | -0.89603300 |
| C  | -2.59208400 | 1.33186900  | 0.80798500  |
| C  | -2.01069800 | 2.53124400  | 1.04910600  |
| O  | -2.41658800 | -2.83916300 | -1.77896400 |
| C  | -1.60781600 | -2.97296600 | -0.89286200 |
| C  | -0.49045700 | -3.97599500 | -0.83768100 |
| O  | -1.59419900 | -2.16977100 | 0.23322000  |
| H  | -5.57541200 | -1.46088700 | -0.84703700 |

|    |             |             |             |
|----|-------------|-------------|-------------|
| H  | -6.54225300 | 1.53094700  | 0.32080800  |
| H  | -3.95294000 | -2.51777500 | 0.20654300  |
| H  | -7.02176500 | -0.42558000 | 0.80264900  |
| H  | -7.20527700 | -2.40431800 | 2.19659400  |
| H  | -6.73158200 | -2.91059900 | 0.57167600  |
| H  | -5.53875100 | -2.88169900 | 1.88864000  |
| H  | -6.31478100 | -0.26894200 | 3.19411400  |
| H  | -5.44358900 | 0.91742000  | 2.22374200  |
| H  | -4.63543500 | -0.57413400 | 2.74222800  |
| H  | -4.08115200 | -0.45603200 | -2.50130200 |
| H  | -4.66273000 | 1.15778200  | -2.93057600 |
| H  | -3.23267000 | 0.96747300  | -1.91616500 |
| H  | -5.46302300 | 2.99621300  | -2.19394800 |
| H  | -6.96422900 | 4.76908200  | -1.45479600 |
| H  | -7.48697400 | 3.75278700  | -0.00120800 |
| H  | -3.67043700 | 1.26665100  | 0.89769300  |
| H  | -2.60723900 | 3.40240200  | 1.30609400  |
| H  | -0.93310700 | 2.66095300  | 1.00050800  |
| H  | -0.40976400 | -4.41042400 | 0.16242600  |
| H  | 0.45673700  | -3.46969100 | -1.05877800 |
| H  | -0.66359500 | -4.75436100 | -1.58165700 |
| H  | 5.59053200  | -3.51723000 | -1.43236400 |
| C  | 4.70915200  | -2.92554200 | -1.66192500 |
| C  | 3.97914800  | -3.17762900 | -2.82454000 |
| C  | 4.31144300  | -1.91192000 | -0.78701200 |
| C  | 2.84434800  | -2.41483700 | -3.11581600 |
| H  | 4.29184500  | -3.96631300 | -3.50266300 |
| C  | 3.17346700  | -1.14392600 | -1.07261000 |
| H  | 4.88462900  | -1.72449700 | 0.11535100  |
| C  | 2.43873300  | -1.40565800 | -2.24246600 |
| H  | 2.27490100  | -2.60590700 | -4.02084800 |
| P  | 2.61269200  | 0.20974300  | 0.02932000  |
| H  | 1.55499500  | -0.81547100 | -2.47411400 |
| C  | 3.47732200  | -0.00753100 | 1.62782400  |
| C  | 3.24636500  | 1.76843600  | -0.69511600 |
| Au | 0.22742100  | 0.20178800  | 0.26868600  |
| C  | 4.72870500  | 0.58051700  | 1.87025800  |
| C  | 2.87841400  | -0.79620100 | 2.62401500  |
| C  | 4.24154200  | 1.77937500  | -1.68336500 |
| C  | 2.72622500  | 2.98577700  | -0.22466400 |
| C  | 5.37262700  | 0.37325800  | 3.09105400  |
| H  | 5.19590400  | 1.20277100  | 1.11312800  |
| C  | 3.52840400  | -1.00243800 | 3.84061100  |
| H  | 1.90391800  | -1.24565600 | 2.44939100  |

|                  |            |             |             |
|------------------|------------|-------------|-------------|
| C                | 4.70966400 | 2.99388000  | -2.18999900 |
| H                | 4.64878400 | 0.84683800  | -2.06095500 |
| C                | 3.20173000 | 4.19488100  | -0.72899200 |
| H                | 1.95367400 | 2.98669900  | 0.54052700  |
| C                | 4.77516700 | -0.41747900 | 4.07503300  |
| H                | 6.33944700 | 0.83315400  | 3.27364400  |
| H                | 3.05868300 | -1.61251800 | 4.60657600  |
| C                | 4.19275600 | 4.19989400  | -1.71461700 |
| H                | 5.47834300 | 2.99453600  | -2.95727300 |
| H                | 2.79674100 | 5.13182400  | -0.35772700 |
| H                | 5.27775400 | -0.57315400 | 5.02521600  |
| H                | 4.55835200 | 5.14219800  | -2.11208500 |
| T <sub>S3b</sub> |            |             |             |
| C                | 3.07222600 | -0.85515100 | -1.27956700 |
| C                | 3.01287800 | -1.30628600 | 0.18867300  |
| C                | 4.05402100 | -0.96129900 | 1.06000400  |
| C                | 2.87130100 | 1.27348300  | -0.21524900 |
| C                | 3.30769400 | 0.63615500  | -1.30421500 |
| C                | 4.04486700 | -1.71215700 | -2.15233300 |
| C                | 3.80674200 | -1.41839600 | -3.64370300 |
| C                | 5.52715900 | -1.54825800 | -1.79118200 |
| C                | 2.23000800 | 0.49810100  | 0.88633300  |
| C                | 2.17397000 | -2.53078900 | 0.48559200  |
| C                | 4.31973600 | -1.55111100 | 2.34447900  |
| C                | 5.35946800 | -1.14631000 | 3.10316200  |
| C                | 2.48387400 | 0.97610400  | 2.25807800  |
| C                | 1.73213100 | 0.66833400  | 3.32841800  |
| O                | 1.13597100 | 3.07840900  | -1.24724600 |
| C                | 2.06550000 | 3.48265000  | -0.59507500 |
| C                | 2.39457300 | 4.91804300  | -0.28618500 |
| O                | 2.99862600 | 2.64590800  | -0.01442300 |
| H                | 2.06585200 | -1.03610000 | -1.69366500 |
| H                | 4.73773800 | -0.17876400 | 0.74476600  |
| H                | 3.73157700 | 1.14841600  | -2.15956300 |
| H                | 3.76928100 | -2.76271500 | -1.98262100 |
| H                | 4.40230400 | -2.09667500 | -4.26368900 |
| H                | 2.75372700 | -1.55101900 | -3.91759300 |
| H                | 4.09766900 | -0.39512700 | -3.90932400 |
| H                | 6.14500800 | -2.15934300 | -2.45768800 |
| H                | 5.74573000 | -1.86798300 | -0.76618300 |
| H                | 5.85487400 | -0.50713000 | -1.89954100 |
| H                | 2.78194100 | -3.43234400 | 0.33017400  |
| H                | 1.80996500 | -2.54999400 | 1.51570100  |
| H                | 1.31048300 | -2.59047200 | -0.18104900 |

|    |             |             |             |
|----|-------------|-------------|-------------|
| H  | 3.68038500  | -2.35274100 | 2.70136900  |
| H  | 5.58248400  | -1.61159000 | 4.05826300  |
| H  | 6.02905000  | -0.35332200 | 2.77825100  |
| H  | 3.34575400  | 1.62799900  | 2.40487600  |
| H  | 1.97477100  | 1.05599300  | 4.31387400  |
| H  | 0.85987400  | 0.02385900  | 3.25086400  |
| H  | 3.40641600  | 5.15551900  | -0.62964900 |
| H  | 2.37001500  | 5.08185700  | 0.79635000  |
| H  | 1.67075600  | 5.56991000  | -0.77546500 |
| H  | -5.87922500 | 2.68057300  | -1.66587500 |
| C  | -4.80462100 | 2.52278300  | -1.66677600 |
| C  | -3.96733600 | 3.39117600  | -2.37337300 |
| C  | -4.26255600 | 1.45462900  | -0.95354000 |
| C  | -2.58590500 | 3.19297200  | -2.36358000 |
| H  | -4.39324100 | 4.22536000  | -2.92365100 |
| C  | -2.87231800 | 1.24692100  | -0.94855200 |
| H  | -4.91799400 | 0.79193000  | -0.39616100 |
| C  | -2.03442600 | 2.12559900  | -1.65239500 |
| H  | -1.92939800 | 3.87214200  | -2.89922100 |
| P  | -2.14000600 | -0.16659200 | -0.05167400 |
| H  | -0.95704300 | 1.99625400  | -1.63451800 |
| C  | -3.14486600 | -0.40506600 | 1.46178800  |
| C  | -2.39371600 | -1.66295100 | -1.08140400 |
| Au | 0.17225600  | 0.10867000  | 0.44200300  |
| C  | -4.21982000 | -1.30581600 | 1.50871300  |
| C  | -2.84589400 | 0.37263800  | 2.59279900  |
| C  | -3.01480800 | -1.60698000 | -2.33629900 |
| C  | -1.91211700 | -2.89492000 | -0.60327200 |
| C  | -4.98430400 | -1.42226500 | 2.67154400  |
| H  | -4.45877300 | -1.91887800 | 0.64531300  |
| C  | -3.61590800 | 0.25594900  | 3.74916700  |
| H  | -2.01357300 | 1.07177200  | 2.56601400  |
| C  | -3.15544200 | -2.76922600 | -3.09966900 |
| H  | -3.38931800 | -0.66331000 | -2.71905700 |
| C  | -2.06311400 | -4.05193300 | -1.36509700 |
| H  | -1.43082500 | -2.95032700 | 0.37038800  |
| C  | -4.68483300 | -0.64320000 | 3.79039500  |
| H  | -5.81354700 | -2.12313900 | 2.70091600  |
| H  | -3.37986900 | 0.86314100  | 4.61832900  |
| C  | -2.68310300 | -3.98972800 | -2.61716700 |
| H  | -3.63828800 | -2.71669700 | -4.07114900 |
| H  | -1.69783900 | -5.00126800 | -0.98371600 |
| H  | -5.28096300 | -0.73743300 | 4.69340900  |
| H  | -2.79698900 | -4.89113400 | -3.21229300 |

4b

|   |             |             |             |
|---|-------------|-------------|-------------|
| C | -3.52136100 | -0.41111800 | 1.45304900  |
| C | -3.31869400 | -1.20692100 | 0.13553900  |
| C | -4.28383700 | -0.96401300 | -0.99517300 |
| C | -3.09578800 | 1.15686900  | -0.24503300 |
| C | -3.46998800 | 1.04311800  | 1.03262100  |
| C | -4.71798600 | -0.83622100 | 2.35229000  |
| C | -4.60743500 | -0.15821400 | 3.72963700  |
| C | -6.11013100 | -0.59827600 | 1.74773700  |
| C | -2.91030400 | -0.16493800 | -0.92695700 |
| C | -2.63464400 | -2.54939400 | 0.32088300  |
| C | -4.57109400 | -1.94937500 | -2.05609200 |
| C | -5.73962200 | -1.98964200 | -2.70601400 |
| C | -1.93287200 | -0.24659100 | -2.00558100 |
| C | -1.25382100 | -1.33469800 | -2.52541200 |
| O | -2.03981000 | 3.56185000  | 0.63381600  |
| C | -2.41982200 | 3.45374500  | -0.50521100 |
| C | -2.43412400 | 4.53263400  | -1.55490400 |
| O | -2.92198900 | 2.28010500  | -1.03301900 |
| H | -2.62386200 | -0.61078000 | 2.06330600  |
| H | -5.11294700 | -0.29165300 | -0.79741400 |
| H | -3.67609400 | 1.86674600  | 1.70144900  |
| H | -4.60743500 | -1.91825700 | 2.51594900  |
| H | -5.36895100 | -0.55110700 | 4.41170100  |
| H | -3.62654000 | -0.32947800 | 4.18882600  |
| H | -4.76123700 | 0.92550000  | 3.65978900  |
| H | -6.88332500 | -0.85938900 | 2.47865600  |
| H | -6.28780400 | -1.21059600 | 0.85874800  |
| H | -6.25713600 | 0.45463300  | 1.47696500  |
| H | -3.15813900 | -3.11301800 | 1.10177700  |
| H | -2.63620300 | -3.17730900 | -0.57235700 |
| H | -1.59680500 | -2.42100500 | 0.65198900  |
| H | -3.80758700 | -2.68025700 | -2.30948600 |
| H | -5.93771700 | -2.73602500 | -3.46904400 |
| H | -6.54162600 | -1.28702400 | -2.49202400 |
| H | -1.77416900 | 0.70652100  | -2.51126800 |
| H | -0.75724100 | -1.23294600 | -3.48799500 |
| H | -1.43749100 | -2.34884300 | -2.18718700 |
| H | -3.46944900 | 4.77149300  | -1.82227500 |
| H | -1.93258400 | 4.19369100  | -2.46663800 |
| H | -1.94362400 | 5.42466300  | -1.16492000 |
| H | 4.57754900  | 4.23391200  | 1.11240400  |
| C | 3.62636100  | 3.71151600  | 1.06979300  |
| C | 2.44160500  | 4.38222400  | 1.38141900  |



|                             |             |             |             |
|-----------------------------|-------------|-------------|-------------|
| C                           | 3.59456100  | 2.36719400  | 0.69581300  |
| C                           | 1.21739800  | 3.71101500  | 1.32059800  |
| H                           | 2.47176500  | 5.42986900  | 1.66674100  |
| C                           | 2.36718000  | 1.68774900  | 0.63659900  |
| H                           | 4.51861200  | 1.85452300  | 0.44769600  |
| C                           | 1.17772300  | 2.36779900  | 0.94800800  |
| H                           | 0.28782100  | 4.22406300  | 1.54462900  |
| P                           | 2.29449400  | -0.08052000 | 0.19030500  |
| H                           | 0.21794500  | 1.85960500  | 0.90231100  |
| C                           | 3.82667500  | -0.49092700 | -0.71572300 |
| C                           | 2.29621600  | -1.05227400 | 1.73775200  |
| Au                          | 0.39202800  | -0.56334200 | -1.11709500 |
| C                           | 4.92352000  | -1.07725100 | -0.06598800 |
| C                           | 3.91235400  | -0.18230700 | -2.08386600 |
| C                           | 2.65782800  | -0.47392700 | 2.96336200  |
| C                           | 1.94693200  | -2.41255400 | 1.68603600  |
| C                           | 6.09284200  | -1.34647000 | -0.78003400 |
| H                           | 4.86676000  | -1.32688900 | 0.98875900  |
| C                           | 5.08412600  | -0.45030100 | -2.78919700 |
| H                           | 3.06596900  | 0.26929500  | -2.59576300 |
| C                           | 2.67286000  | -1.25286400 | 4.12249700  |
| H                           | 2.92327700  | 0.57706200  | 3.01642900  |
| C                           | 1.96937700  | -3.18497900 | 2.84581600  |
| H                           | 1.66434000  | -2.86776500 | 0.73961500  |
| C                           | 6.17446600  | -1.03405900 | -2.13806500 |
| H                           | 6.93784000  | -1.80306200 | -0.27327600 |
| H                           | 5.14427100  | -0.20961500 | -3.84643500 |
| C                           | 2.33076800  | -2.60474700 | 4.06549900  |
| H                           | 2.95139500  | -0.79984400 | 5.06934300  |
| H                           | 1.70217200  | -4.23659600 | 2.79929200  |
| H                           | 7.08457000  | -1.24838900 | -2.69052000 |
| H                           | 2.34284300  | -3.20637900 | 4.96960700  |
| T <sub>S<sub>4b</sub></sub> |             |             |             |
| C                           | -3.11677000 | -0.59012700 | 1.38804600  |
| C                           | -3.05945100 | -1.13566500 | -0.07302300 |
| C                           | -4.23653600 | -0.84814000 | -0.89619600 |
| C                           | -2.76482200 | 1.25770300  | -0.00834800 |
| C                           | -3.17654500 | 0.91367900  | 1.21996900  |
| C                           | -4.16394400 | -1.24100900 | 2.33190500  |
| C                           | -3.89830100 | -0.80042100 | 3.78296600  |
| C                           | -5.63003200 | -0.98512900 | 1.95334300  |
| C                           | -2.42273200 | 0.08818300  | -0.87354800 |
| C                           | -2.45867000 | -2.53279400 | -0.18573500 |
| C                           | -4.64222800 | -1.57144100 | -2.06095500 |

|    |             |             |             |
|----|-------------|-------------|-------------|
| C  | -5.65915000 | -1.14365400 | -2.84311800 |
| C  | -2.12555700 | 0.29686600  | -2.31379500 |
| C  | -1.82296900 | -0.59420500 | -3.27600800 |
| O  | -1.21225700 | 3.24463800  | 1.06519800  |
| C  | -1.87874500 | 3.47944800  | 0.08965400  |
| C  | -1.99828600 | 4.79717200  | -0.62661900 |
| O  | -2.66054000 | 2.52791400  | -0.54345000 |
| H  | -2.13009900 | -0.82954900 | 1.82726400  |
| H  | -4.82555400 | 0.02319800  | -0.63362400 |
| H  | -3.41505500 | 1.60533400  | 2.01666400  |
| H  | -3.99064600 | -2.32603900 | 2.28890800  |
| H  | -4.55422300 | -1.34209500 | 4.47255800  |
| H  | -2.86205300 | -0.99675300 | 4.08189600  |
| H  | -4.09144700 | 0.26999100  | 3.92222900  |
| H  | -6.29320600 | -1.43768000 | 2.69857200  |
| H  | -5.89374200 | -1.41875700 | 0.98240000  |
| H  | -5.85452800 | 0.08798200  | 1.91769400  |
| H  | -3.16557000 | -3.27443500 | 0.20354600  |
| H  | -2.21187200 | -2.81262500 | -1.21222700 |
| H  | -1.53993000 | -2.59625100 | 0.40554300  |
| H  | -4.13740500 | -2.49893500 | -2.31325300 |
| H  | -5.99570900 | -1.71551600 | -3.70230000 |
| H  | -6.19491900 | -0.22221000 | -2.62811700 |
| H  | -2.16281500 | 1.34936100  | -2.58998800 |
| H  | -1.64009900 | -0.25674400 | -4.29074600 |
| H  | -1.74228700 | -1.66220300 | -3.10062700 |
| H  | -3.03719400 | 5.14256300  | -0.60025200 |
| H  | -1.71915700 | 4.68401700  | -1.67920000 |
| H  | -1.35197500 | 5.53175100  | -0.14614000 |
| H  | 5.65135000  | 3.33071700  | 0.36547900  |
| C  | 4.62365700  | 3.06498000  | 0.59523300  |
| C  | 3.79588100  | 3.97189800  | 1.26193900  |
| C  | 4.13280300  | 1.81563900  | 0.21507700  |
| C  | 2.47201100  | 3.63145200  | 1.54855300  |
| H  | 4.18163600  | 4.94533000  | 1.55100500  |
| C  | 2.80303200  | 1.46878300  | 0.50705700  |
| H  | 4.78025900  | 1.11997500  | -0.30979900 |
| C  | 1.97214700  | 2.38486700  | 1.17193100  |
| H  | 1.81836400  | 4.33537600  | 2.05463300  |
| P  | 2.14130000  | -0.17413000 | 0.06613300  |
| H  | 0.93606700  | 2.14007300  | 1.38459400  |
| C  | 3.09960500  | -0.78934300 | -1.36391900 |
| C  | 2.48665800  | -1.30803000 | 1.46004900  |
| Au | -0.14941100 | -0.08392600 | -0.39147700 |

|                  |             |             |             |
|------------------|-------------|-------------|-------------|
| C                | 4.24197000  | -1.58494400 | -1.18173200 |
| C                | 2.70894300  | -0.42272100 | -2.66217800 |
| C                | 3.27668200  | -0.91683600 | 2.55003800  |
| C                | 1.94197500  | -2.60342700 | 1.42624800  |
| C                | 4.98604400  | -2.00005200 | -2.28763600 |
| H                | 4.54843900  | -1.88354900 | -0.18405900 |
| C                | 3.45878400  | -0.83819400 | -3.76163600 |
| H                | 1.81814700  | 0.18168900  | -2.81244400 |
| C                | 3.52029100  | -1.81513900 | 3.59215700  |
| H                | 3.69994700  | 0.08150600  | 2.58945500  |
| C                | 2.19466500  | -3.49629400 | 2.46528400  |
| H                | 1.32741800  | -2.91409400 | 0.58470500  |
| C                | 4.59687300  | -1.62739200 | -3.57554900 |
| H                | 5.86759200  | -2.61712500 | -2.14074700 |
| H                | 3.15120900  | -0.55178500 | -4.76306900 |
| C                | 2.98244600  | -3.10167400 | 3.55133900  |
| H                | 4.13147100  | -1.50529100 | 4.43468900  |
| H                | 1.77537600  | -4.49765100 | 2.43086100  |
| H                | 5.17623200  | -1.95529600 | -4.43370600 |
| H                | 3.17392100  | -3.79682300 | 4.36353500  |
| T <sub>S1c</sub> |             |             |             |
| C                | -4.70722500 | 0.36539000  | 0.63356300  |
| C                | -4.87050900 | -0.88563600 | -0.23144800 |
| C                | -4.41346200 | -2.08159100 | 0.32022900  |
| C                | -2.80435700 | -0.85878900 | -0.06438200 |
| C                | -3.17524000 | 0.52910500  | 0.41868600  |
| C                | -5.66692600 | 1.58154500  | 0.53954100  |
| C                | -5.29882100 | 2.58152400  | 1.65361000  |
| C                | -5.82442600 | 2.31948100  | -0.80239000 |
| C                | -1.76860400 | -1.52523800 | -0.51245900 |
| C                | -5.36448600 | -0.83502300 | -1.64640300 |
| C                | -4.29428700 | -2.47449000 | 1.72552200  |
| C                | -4.10570900 | -3.75596500 | 2.07282900  |
| C                | -1.69182100 | -2.85198400 | -1.13472100 |
| C                | -2.24008300 | -3.18379700 | -2.31236300 |
| O                | -2.88295800 | 1.46207600  | -0.64039500 |
| C                | -1.95803900 | 2.43547400  | -0.38339600 |
| C                | -1.76111600 | 3.32032800  | -1.58638600 |
| O                | -1.40563100 | 2.56171400  | 0.68719900  |
| H                | -4.80451600 | 0.03954600  | 1.67415400  |
| H                | -4.31718000 | -2.91022100 | -0.37733000 |
| H                | -2.62501200 | 0.84704900  | 1.30769000  |
| H                | -6.65548500 | 1.17034900  | 0.79298500  |
| H                | -6.03122300 | 3.39405200  | 1.69241100  |

|    |             |             |             |
|----|-------------|-------------|-------------|
| H  | -5.28212100 | 2.10374100  | 2.64040800  |
| H  | -4.31353900 | 3.03194600  | 1.48443300  |
| H  | -6.56092000 | 3.12026100  | -0.67465500 |
| H  | -6.19147000 | 1.67587800  | -1.60468100 |
| H  | -4.89027000 | 2.77576700  | -1.13564000 |
| H  | -4.88982100 | -0.03397900 | -2.21915300 |
| H  | -5.21079500 | -1.78840900 | -2.15806300 |
| H  | -6.44356500 | -0.62995600 | -1.63472700 |
| H  | -4.39477700 | -1.72196900 | 2.50182400  |
| H  | -4.06193500 | -4.05798100 | 3.11435500  |
| H  | -4.00134400 | -4.54339000 | 1.33034900  |
| H  | -1.06573700 | -3.57665900 | -0.61478100 |
| H  | -2.08676600 | -4.16962600 | -2.74078400 |
| H  | -2.81327700 | -2.47327400 | -2.90174700 |
| H  | -0.77843700 | 3.79121100  | -1.53034900 |
| H  | -2.52501800 | 4.10738100  | -1.58191800 |
| H  | -1.86368400 | 2.75493400  | -2.51531200 |
| H  | 4.86427800  | 3.79767000  | -2.11624600 |
| C  | 4.02169600  | 3.52198700  | -1.48874200 |
| C  | 3.17034500  | 4.50625200  | -0.98457100 |
| C  | 3.79699600  | 2.17675900  | -1.18721900 |
| C  | 2.08627400  | 4.14558800  | -0.17873300 |
| H  | 3.34996200  | 5.55168200  | -1.21875300 |
| C  | 2.70991400  | 1.81188400  | -0.37940200 |
| H  | 4.46645200  | 1.41855600  | -1.58023200 |
| C  | 1.84928000  | 2.80399100  | 0.12016500  |
| H  | 1.42200700  | 4.90746700  | 0.21943600  |
| P  | 2.38923000  | 0.06739000  | 0.07618200  |
| H  | 0.99389800  | 2.53679600  | 0.73337600  |
| C  | 3.50448000  | -0.96244000 | -0.94842000 |
| C  | 2.94317100  | -0.12282200 | 1.81134600  |
| Au | 0.13210300  | -0.63975000 | -0.21307600 |
| C  | 4.78138000  | -1.33472900 | -0.50078100 |
| C  | 3.07305500  | -1.36997500 | -2.22164200 |
| C  | 3.82647000  | 0.79080100  | 2.40635600  |
| C  | 2.48994100  | -1.22748000 | 2.55132800  |
| C  | 5.61328200  | -2.10071600 | -1.31938300 |
| H  | 5.12511800  | -1.03463400 | 0.48421500  |
| C  | 3.91070400  | -2.13003000 | -3.03732800 |
| H  | 2.08189000  | -1.09479100 | -2.57388000 |
| C  | 4.25175900  | 0.59638800  | 3.72200500  |
| H  | 4.17804800  | 1.65362700  | 1.84967500  |
| C  | 2.92183100  | -1.41896400 | 3.86293700  |
| H  | 1.79992500  | -1.93711200 | 2.10159600  |

|    |             |             |             |
|----|-------------|-------------|-------------|
| C  | 5.18077900  | -2.49779800 | -2.58616100 |
| H  | 6.59853500  | -2.38843100 | -0.96420900 |
| H  | 3.56921100  | -2.44025800 | -4.02059100 |
| C  | 3.80192700  | -0.50622800 | 4.45021400  |
| H  | 4.93300500  | 1.30965900  | 4.17675200  |
| H  | 2.56696600  | -2.27602900 | 4.42793400  |
| H  | 5.82994900  | -3.09594300 | -3.21903400 |
| H  | 4.13272700  | -0.65262900 | 5.47435500  |
| 2c |             |             |             |
| C  | -4.37211200 | 0.57878100  | 0.84159400  |
| C  | -5.14882900 | -0.52320900 | 0.23117900  |
| C  | -4.23753600 | -1.60112800 | -0.18453700 |
| C  | -2.83870700 | -0.99209400 | -0.18866000 |
| C  | -2.99531600 | 0.48788200  | 0.10375400  |
| C  | -5.04924900 | 1.93092300  | 1.18167700  |
| C  | -4.14279000 | 2.75558100  | 2.11255100  |
| C  | -5.48973600 | 2.77374700  | -0.02956800 |
| C  | -1.67727900 | -1.64810200 | -0.38717400 |
| C  | -6.60774500 | -0.56135900 | 0.06185200  |
| C  | -4.46161800 | -2.59972100 | 0.97692400  |
| C  | -5.11692800 | -3.75661500 | 0.85214800  |
| C  | -1.67234200 | -3.07500500 | -0.76397300 |
| C  | -2.19431200 | -3.57706300 | -1.89358600 |
| O  | -3.08783000 | 1.18972700  | -1.16213700 |
| C  | -2.24145300 | 2.23996300  | -1.37353600 |
| C  | -2.30872300 | 2.70319600  | -2.80526100 |
| O  | -1.53607700 | 2.71202100  | -0.50866000 |
| H  | -4.12129200 | 0.11453400  | 1.82494400  |
| H  | -4.56522300 | -2.09026900 | -1.10803200 |
| H  | -2.18573900 | 0.92353000  | 0.68612300  |
| H  | -5.95386600 | 1.67324800  | 1.75157300  |
| H  | -4.65888400 | 3.66920500  | 2.42406700  |
| H  | -3.87830500 | 2.19818700  | 3.01931700  |
| H  | -3.21617600 | 3.04942000  | 1.60794100  |
| H  | -6.14683200 | 3.57916300  | 0.31414900  |
| H  | -6.04086500 | 2.19902900  | -0.78140700 |
| H  | -4.63507000 | 3.23803800  | -0.52626100 |
| H  | -6.83763500 | 0.10259900  | -0.79003800 |
| H  | -6.98251700 | -1.55991000 | -0.16799900 |
| H  | -7.14009100 | -0.13160700 | 0.91784700  |
| H  | -3.99645600 | -2.31207200 | 1.91696400  |
| H  | -5.17851600 | -4.45019200 | 1.68609500  |
| H  | -5.57342800 | -4.07361700 | -0.08188900 |
| H  | -1.12146500 | -3.74275700 | -0.09968000 |

|                  |             |             |             |
|------------------|-------------|-------------|-------------|
| H                | -2.09490300 | -4.62917500 | -2.14461400 |
| H                | -2.68325600 | -2.94187500 | -2.62929700 |
| H                | -1.76954000 | 1.98846400  | -3.43792700 |
| H                | -1.83915900 | 3.68336300  | -2.89465800 |
| H                | -3.34305500 | 2.74085700  | -3.15795000 |
| H                | 5.19310000  | 3.05206100  | -2.76557400 |
| C                | 4.24220100  | 2.91083700  | -2.25973900 |
| C                | 3.25487900  | 3.89512300  | -2.33444000 |
| C                | 4.01320400  | 1.73938800  | -1.53489900 |
| C                | 2.03154900  | 3.70580500  | -1.68641400 |
| H                | 3.43735500  | 4.80530200  | -2.89884100 |
| C                | 2.78659600  | 1.54645700  | -0.88180300 |
| H                | 4.78660300  | 0.97957000  | -1.48302200 |
| C                | 1.79210400  | 2.53477100  | -0.96812300 |
| H                | 1.25721900  | 4.46572600  | -1.74155500 |
| P                | 2.43292500  | 0.04727500  | 0.11082100  |
| H                | 0.83147200  | 2.39497700  | -0.48080000 |
| C                | 3.70296800  | -1.19245800 | -0.34986100 |
| C                | 2.77570900  | 0.50135000  | 1.85521900  |
| Au               | 0.20341000  | -0.80432700 | -0.17773100 |
| C                | 4.91652400  | -1.30767300 | 0.34543600  |
| C                | 3.45255700  | -2.03737000 | -1.44386300 |
| C                | 3.54439300  | 1.62414500  | 2.19594100  |
| C                | 2.26059500  | -0.31629400 | 2.87487100  |
| C                | 5.86550900  | -2.25069300 | -0.05373100 |
| H                | 5.11920800  | -0.66844900 | 1.19916000  |
| C                | 4.40612700  | -2.97408900 | -1.84161400 |
| H                | 2.51136800  | -1.96334500 | -1.98300200 |
| C                | 3.79856500  | 1.91844700  | 3.53727800  |
| H                | 3.94014400  | 2.27063800  | 1.41895200  |
| C                | 2.52292200  | -0.02196800 | 4.21229500  |
| H                | 1.65501100  | -1.18267600 | 2.62014300  |
| C                | 5.61284900  | -3.08263600 | -1.14615100 |
| H                | 6.80090600  | -2.33582600 | 0.49191000  |
| H                | 4.20384500  | -3.62282100 | -2.68901700 |
| C                | 3.29116500  | 1.09684000  | 4.54512800  |
| H                | 4.39286400  | 2.79121700  | 3.79231800  |
| H                | 2.12386400  | -0.66202700 | 4.99410500  |
| H                | 6.35231700  | -3.81713000 | -1.45218800 |
| H                | 3.49049800  | 1.32879400  | 5.58748300  |
| Ts <sub>2c</sub> |             |             |             |
| C                | 4.23553500  | -0.77664100 | 1.09157600  |
| C                | 4.97339900  | 0.53697800  | 0.99019000  |
| C                | 4.24472800  | 1.51338200  | 0.33537600  |

|   |             |             |             |
|---|-------------|-------------|-------------|
| C | 2.79303000  | 0.87318600  | -0.00263200 |
| C | 2.97217100  | -0.62026200 | 0.21386000  |
| C | 5.08582500  | -2.07608100 | 1.01118300  |
| C | 4.22951900  | -3.31671200 | 1.31180500  |
| C | 5.90245100  | -2.24015500 | -0.28212200 |
| C | 1.68438200  | 1.54479400  | -0.41924500 |
| C | 6.23405100  | 0.76342700  | 1.75010000  |
| C | 4.50273900  | 2.97396600  | 0.36283000  |
| C | 5.63552200  | 3.54853300  | -0.04943600 |
| C | 1.72527600  | 2.85655100  | -1.06312600 |
| C | 2.45173400  | 3.14018000  | -2.15882400 |
| O | 3.17045500  | -1.20527200 | -1.10137500 |
| C | 2.19924800  | -2.03889900 | -1.57782200 |
| C | 2.49633900  | -2.45315700 | -2.99563600 |
| O | 1.23538100  | -2.37820500 | -0.92743700 |
| H | 3.85438100  | -0.74566900 | 2.13053100  |
| H | 3.91132500  | 1.13149000  | -0.77416400 |
| H | 2.09082600  | -1.08095700 | 0.65653400  |
| H | 5.80946200  | -1.98482500 | 1.83320000  |
| H | 4.86135800  | -4.21019200 | 1.35032100  |
| H | 3.72166100  | -3.22848500 | 2.27961500  |
| H | 3.46353900  | -3.48530200 | 0.54768600  |
| H | 6.60562300  | -3.07210600 | -0.16795100 |
| H | 6.49032200  | -1.34439500 | -0.51611300 |
| H | 5.26627500  | -2.45249600 | -1.14338500 |
| H | 7.07387500  | 0.25924400  | 1.25144200  |
| H | 6.47735200  | 1.82306400  | 1.84033000  |
| H | 6.16288800  | 0.31934300  | 2.75100400  |
| H | 3.70153600  | 3.58276700  | 0.77515400  |
| H | 5.78371900  | 4.62018500  | 0.04251000  |
| H | 6.44616900  | 2.98105600  | -0.49956800 |
| H | 1.02139300  | 3.60110700  | -0.69200100 |
| H | 2.38184000  | 4.10723300  | -2.64717700 |
| H | 3.09256400  | 2.40120800  | -2.63507600 |
| H | 2.34183900  | -1.59830500 | -3.66408300 |
| H | 1.82518400  | -3.26200400 | -3.28586400 |
| H | 3.53787400  | -2.76995300 | -3.10198200 |
| H | -5.73402600 | -2.01748600 | -3.04456400 |
| C | -4.72413700 | -2.06339400 | -2.64731700 |
| C | -3.83082700 | -3.03146800 | -3.10979900 |
| C | -4.32318900 | -1.14773900 | -1.67281700 |
| C | -2.53163000 | -3.08302700 | -2.59855900 |
| H | -4.14541500 | -3.74206600 | -3.86884200 |
| C | -3.01893700 | -1.19750500 | -1.15712000 |

|    |             |             |             |
|----|-------------|-------------|-------------|
| H  | -5.02313500 | -0.39663200 | -1.32057800 |
| C  | -2.11948500 | -2.16807100 | -1.62968500 |
| H  | -1.83371900 | -3.83431800 | -2.95711900 |
| P  | -2.45819200 | -0.03848300 | 0.14512000  |
| H  | -1.10360000 | -2.21381300 | -1.24692900 |
| C  | -3.64699500 | 1.35612300  | 0.14950500  |
| C  | -2.66640800 | -0.90548500 | 1.74590200  |
| Au | -0.22009300 | 0.74439500  | -0.16719800 |
| C  | -4.75179000 | 1.38808700  | 1.01353400  |
| C  | -3.44905900 | 2.41012000  | -0.75789400 |
| C  | -3.47256200 | -2.04633300 | 1.87057800  |
| C  | -2.01126700 | -0.39503700 | 2.87913200  |
| C  | -5.64670600 | 2.45894800  | 0.96477900  |
| H  | -4.91257200 | 0.58429500  | 1.72516100  |
| C  | -4.34941200 | 3.47349600  | -0.80692300 |
| H  | -2.59109600 | 2.39715100  | -1.42575400 |
| C  | -3.62349400 | -2.66340900 | 3.11423200  |
| H  | -3.97749800 | -2.45523900 | 1.00119400  |
| C  | -2.17066900 | -1.01132900 | 4.11942700  |
| H  | -1.37897800 | 0.48518200  | 2.79013000  |
| C  | -5.44820200 | 3.49979800  | 0.05595900  |
| H  | -6.49795100 | 2.47851300  | 1.63913000  |
| H  | -4.19034200 | 4.28336900  | -1.51305700 |
| C  | -2.97576200 | -2.14752800 | 4.23783000  |
| H  | -4.24711900 | -3.54832200 | 3.20228900  |
| H  | -1.66399200 | -0.60820500 | 4.99164400  |
| H  | -6.14549300 | 4.33193100  | 0.02222200  |
| H  | -3.09503600 | -2.63053400 | 5.20341300  |
| 3c |             |             |             |
| C  | -3.83133900 | -0.59108800 | 1.40019200  |
| C  | -3.39123100 | -1.85559300 | 0.67962100  |
| C  | -2.91139000 | -1.61262400 | -0.56223300 |
| C  | -2.94725400 | -0.10376400 | -0.86955900 |
| C  | -3.10415400 | 0.48536000  | 0.56114300  |
| C  | -5.38072900 | -0.50429000 | 1.58365300  |
| C  | -5.78914500 | 0.56866700  | 2.60701800  |
| C  | -6.17086300 | -0.36701700 | 0.27303900  |
| C  | -1.72752300 | 0.42809800  | -1.54828400 |
| C  | -3.52577100 | -3.19058900 | 1.35074800  |
| C  | -2.45619000 | -2.56576800 | -1.58152200 |
| C  | -3.00232200 | -3.76196200 | -1.84401600 |
| C  | -1.80668500 | 0.87737100  | -2.91818900 |
| C  | -2.70034200 | 0.38744500  | -3.80680100 |
| O  | -3.77194400 | 1.76111300  | 0.56756500  |



|    |             |             |             |
|----|-------------|-------------|-------------|
| C  | -3.16658400 | 2.75702800  | -0.09723200 |
| C  | -3.88556000 | 4.06910400  | 0.04568100  |
| O  | -2.13810900 | 2.59601400  | -0.74454300 |
| H  | -3.40964900 | -0.58115500 | 2.41515000  |
| H  | -3.85092800 | 0.13994100  | -1.44635300 |
| H  | -2.10336700 | 0.64128200  | 0.97465000  |
| H  | -5.65498600 | -1.47363200 | 2.02403800  |
| H  | -6.86247700 | 0.50044400  | 2.81643100  |
| H  | -5.25810900 | 0.43498400  | 3.55715600  |
| H  | -5.58165900 | 1.57813600  | 2.24174600  |
| H  | -7.24322000 | -0.47612000 | 0.46796100  |
| H  | -5.88929000 | -1.13647300 | -0.45490200 |
| H  | -6.02207500 | 0.61635900  | -0.18643000 |
| H  | -4.55620300 | -3.56766800 | 1.30633400  |
| H  | -2.88320200 | -3.94186500 | 0.88296500  |
| H  | -3.26580000 | -3.11454600 | 2.41379800  |
| H  | -1.60639600 | -2.24673900 | -2.18640300 |
| H  | -2.58790700 | -4.40938200 | -2.61127600 |
| H  | -3.88233000 | -4.12715600 | -1.32313400 |
| H  | -1.01166600 | 1.52916800  | -3.27163800 |
| H  | -2.62209600 | 0.62834800  | -4.86334500 |
| H  | -3.47841200 | -0.31664200 | -3.52824800 |
| H  | -4.92178800 | 3.96627200  | -0.29279600 |
| H  | -3.37603000 | 4.83495800  | -0.53917600 |
| H  | -3.91377100 | 4.36227400  | 1.10050400  |
| H  | 6.43187400  | 2.80023900  | -0.25301900 |
| C  | 5.35662100  | 2.79219300  | -0.10026300 |
| C  | 4.66187300  | 3.99289300  | 0.05892300  |
| C  | 4.67261300  | 1.57573200  | -0.06898600 |
| C  | 3.27755200  | 3.98005600  | 0.24707000  |
| H  | 5.19710600  | 4.93756100  | 0.03051000  |
| C  | 3.28245700  | 1.55661700  | 0.12410700  |
| H  | 5.21910200  | 0.64699100  | -0.20118600 |
| C  | 2.58791200  | 2.76843400  | 0.27542100  |
| H  | 2.73377000  | 4.91292900  | 0.36379100  |
| P  | 2.34546700  | -0.01340900 | 0.20945500  |
| H  | 1.50913600  | 2.76487500  | 0.41138500  |
| C  | 3.34444000  | -1.27647200 | -0.66114600 |
| C  | 2.28858800  | -0.50952800 | 1.97158200  |
| Au | 0.14515000  | 0.21242100  | -0.72352700 |
| C  | 4.24263600  | -2.10906400 | 0.02345100  |
| C  | 3.21829900  | -1.39199100 | -2.05553800 |
| C  | 3.17592200  | 0.01871000  | 2.92089700  |
| C  | 1.33505700  | -1.46163000 | 2.37054800  |

|                  |             |             |             |
|------------------|-------------|-------------|-------------|
| C                | 5.00937400  | -3.03828900 | -0.68236300 |
| H                | 4.34110600  | -2.03758600 | 1.10220100  |
| C                | 3.98984500  | -2.31871900 | -2.75526500 |
| H                | 2.51743000  | -0.75723900 | -2.59237800 |
| C                | 3.11276600  | -0.40642800 | 4.24967200  |
| H                | 3.91117300  | 0.76165000  | 2.62821700  |
| C                | 1.28180700  | -1.88735100 | 3.69705100  |
| H                | 0.63661900  | -1.86999000 | 1.64385200  |
| C                | 4.88538800  | -3.14308000 | -2.06898400 |
| H                | 5.70148200  | -3.68133700 | -0.14656200 |
| H                | 3.88801600  | -2.40139500 | -3.83341300 |
| C                | 2.16956700  | -1.35910000 | 4.63835700  |
| H                | 3.80146800  | 0.00893600  | 4.97957600  |
| H                | 0.54556900  | -2.62745200 | 3.99722800  |
| H                | 5.48194100  | -3.86883100 | -2.61401800 |
| H                | 2.12334800  | -1.68746100 | 5.67264300  |
| Ts <sub>3c</sub> |             |             |             |
| C                | -5.03231200 | 1.16406300  | -0.48224100 |
| C                | -3.91236400 | 2.15204500  | -0.71822700 |
| C                | -2.67421100 | 1.58329700  | -0.67143500 |
| C                | -2.80782700 | 0.11652100  | -0.53328100 |
| C                | -4.31103300 | -0.20525500 | -0.64497000 |
| C                | -5.80651300 | 1.47010000  | 0.84398800  |
| C                | -7.12910700 | 0.69490900  | 0.95373400  |
| C                | -4.95855500 | 1.34051200  | 2.11889800  |
| C                | -1.75209300 | -0.85052400 | -0.52910800 |
| C                | -4.22516900 | 3.58414800  | -1.01298600 |
| C                | -1.38993900 | 2.26786700  | -0.87424700 |
| C                | -1.01823700 | 3.40321100  | -0.26777900 |
| C                | -2.11419800 | -2.25937700 | -0.75046100 |
| C                | -1.28709800 | -3.28954400 | -0.50635900 |
| O                | -4.68688700 | -1.19209400 | 0.32451400  |
| C                | -5.35989900 | -2.30322700 | -0.12729400 |
| C                | -5.73775700 | -3.19947000 | 1.02123600  |
| O                | -5.58249300 | -2.50487700 | -1.29719400 |
| H                | -5.77148200 | 1.26937200  | -1.28826400 |
| H                | -2.38348800 | -0.30167300 | 0.58421600  |
| H                | -4.52088900 | -0.61056500 | -1.63964800 |
| H                | -6.08416000 | 2.52909600  | 0.74693900  |
| H                | -7.73075000 | 1.09865100  | 1.77545300  |
| H                | -7.72229900 | 0.78007400  | 0.03591200  |
| H                | -6.96820900 | -0.36667300 | 1.15852000  |
| H                | -5.52782000 | 1.69910500  | 2.98340300  |
| H                | -4.04011100 | 1.93686900  | 2.06308300  |

|    |             |             |             |
|----|-------------|-------------|-------------|
| H  | -4.68213000 | 0.29993300  | 2.31406900  |
| H  | -4.51742900 | 4.11906100  | -0.09915800 |
| H  | -3.36865800 | 4.10865100  | -1.44264400 |
| H  | -5.07639400 | 3.65543000  | -1.70082900 |
| H  | -0.71503300 | 1.81446700  | -1.60017800 |
| H  | -0.06927500 | 3.87659900  | -0.49889400 |
| H  | -1.63646000 | 3.88479300  | 0.48529300  |
| H  | -3.07551000 | -2.47476300 | -1.21050900 |
| H  | -1.58137700 | -4.30876900 | -0.74040000 |
| H  | -0.30199800 | -3.14813800 | -0.07070200 |
| H  | -4.85250800 | -3.44711400 | 1.61568000  |
| H  | -6.19713700 | -4.10876500 | 0.63309100  |
| H  | -6.44275100 | -2.68650400 | 1.68407800  |
| H  | 6.54347800  | -2.44624300 | -1.79740300 |
| C  | 5.56819100  | -2.01448300 | -2.00226200 |
| C  | 5.03645800  | -2.06383400 | -3.29253300 |
| C  | 4.84856600  | -1.41407000 | -0.96794200 |
| C  | 3.77877700  | -1.51350000 | -3.55129100 |
| H  | 5.59851800  | -2.53450400 | -4.09389300 |
| C  | 3.58516900  | -0.85780100 | -1.22180300 |
| H  | 5.26815100  | -1.38650700 | 0.03281400  |
| C  | 3.05280300  | -0.91717300 | -2.52059100 |
| H  | 3.35973700  | -1.55458900 | -4.55240900 |
| P  | 2.61607300  | -0.03042200 | 0.09356200  |
| H  | 2.06998700  | -0.49976700 | -2.72570400 |
| C  | 3.21606200  | -0.68890300 | 1.69411000  |
| C  | 3.09631400  | 1.73906900  | 0.07258200  |
| Au | 0.27388000  | -0.38379100 | -0.21943800 |
| C  | 4.26992900  | -0.07544300 | 2.38964300  |
| C  | 2.62695600  | -1.85019100 | 2.21980500  |
| C  | 4.13386300  | 2.21826900  | -0.73941900 |
| C  | 2.40726900  | 2.62980900  | 0.91322200  |
| C  | 4.72842200  | -0.62218800 | 3.58938700  |
| H  | 4.72785700  | 0.82898200  | 2.00140400  |
| C  | 3.09097300  | -2.39423700 | 3.41691700  |
| H  | 1.80482500  | -2.32786100 | 1.69328600  |
| C  | 4.47920800  | 3.57171800  | -0.70692700 |
| H  | 4.67242300  | 1.54155700  | -1.39471000 |
| C  | 2.76379300  | 3.97710300  | 0.94915200  |
| H  | 1.59686700  | 2.26970500  | 1.54176800  |
| C  | 4.14147700  | -1.78020700 | 4.10323300  |
| H  | 5.54255000  | -0.14030400 | 4.12282500  |
| H  | 2.62910300  | -3.29233600 | 3.81656700  |
| C  | 3.79889400  | 4.45033700  | 0.13674800  |

|    |             |             |             |
|----|-------------|-------------|-------------|
| H  | 5.28312700  | 3.93549800  | -1.34012000 |
| H  | 2.23449700  | 4.65765300  | 1.61011600  |
| H  | 4.49848800  | -2.20121300 | 5.03860000  |
| H  | 4.07281400  | 5.50104300  | 0.16295200  |
| 4c |             |             |             |
| C  | -4.06769200 | -0.39862400 | 1.14588800  |
| C  | -3.73825300 | -1.82556200 | 0.74517800  |
| C  | -2.99963200 | -1.87090700 | -0.39694300 |
| C  | -2.64637800 | -0.51478200 | -0.84229300 |
| C  | -3.04058000 | 0.41142100  | 0.29574800  |
| C  | -5.59203600 | -0.09116200 | 0.97502900  |
| C  | -6.02939400 | 1.20071900  | 1.68460500  |
| C  | -6.08192000 | -0.12669500 | -0.48041100 |
| C  | -2.02988800 | -0.22002000 | -2.01114900 |
| C  | -4.20505500 | -2.97812000 | 1.57901900  |
| C  | -2.50861100 | -3.06637100 | -1.09627800 |
| C  | -3.19611100 | -4.19363300 | -1.31901100 |
| C  | -1.57220200 | 1.07404400  | -2.48140200 |
| C  | -0.96008900 | 1.25850800  | -3.66365900 |
| O  | -3.51650200 | 1.69089300  | -0.17537300 |
| C  | -3.12576500 | 2.79359300  | 0.51803900  |
| C  | -3.67142400 | 4.04481700  | -0.12967900 |
| O  | -2.43829700 | 2.76402900  | 1.51384300  |
| H  | -3.84694700 | -0.25135800 | 2.21275500  |
| H  | -1.84248400 | -1.04983900 | -2.69251000 |
| H  | -2.16743200 | 0.61089800  | 0.92465600  |
| H  | -6.09397700 | -0.91321400 | 1.50689400  |
| H  | -7.12364300 | 1.25177500  | 1.73544000  |
| H  | -5.64454900 | 1.24716100  | 2.71023800  |
| H  | -5.68668100 | 2.09327500  | 1.15430800  |
| H  | -7.17248300 | -0.01555400 | -0.51383600 |
| H  | -5.82730000 | -1.07272200 | -0.96955000 |
| H  | -5.64175900 | 0.68424100  | -1.06838300 |
| H  | -5.27088300 | -3.19612000 | 1.42025400  |
| H  | -3.64796800 | -3.89122600 | 1.35062600  |
| H  | -4.09058400 | -2.75132400 | 2.64729500  |
| H  | -1.48771200 | -2.99926100 | -1.47407700 |
| H  | -2.74279200 | -5.03532000 | -1.83537300 |
| H  | -4.23296100 | -4.30988400 | -1.01621000 |
| H  | -1.72610200 | 1.93066000  | -1.83223100 |
| H  | -0.61690200 | 2.23802200  | -3.98251100 |
| H  | -0.78331800 | 0.43238000  | -4.34927200 |
| H  | -3.41215100 | 4.07009600  | -1.19268300 |
| H  | -3.26727000 | 4.92095300  | 0.37849800  |

H -4.76485500 4.05523700 -0.06215600

### S1-2 Cartesian coordinates of some key stationary points in Figure 3

|     |             |             |             |
|-----|-------------|-------------|-------------|
| 1-2 |             |             |             |
| C   | -4.65003300 | -0.82815200 | 0.98430600  |
| C   | -4.46103000 | -2.14511600 | 0.22525500  |
| C   | -4.94893000 | -2.33343300 | -1.02001100 |
| C   | -2.51240200 | 0.06193900  | -0.10798900 |
| C   | -3.24156400 | -0.16400300 | 1.16546700  |
| C   | -5.81325400 | 0.09742600  | 0.50051400  |
| C   | -6.48655100 | 0.82314200  | 1.68146000  |
| C   | -5.47205800 | 1.10790000  | -0.60827700 |
| C   | -2.23371200 | 0.26868600  | -1.29263300 |
| C   | -3.68208400 | -3.20353300 | 0.97740000  |
| C   | -4.80851900 | -3.51534500 | -1.86125100 |
| C   | -5.31090100 | -3.59416600 | -3.10512300 |
| C   | -2.08637500 | 0.52840400  | -2.69146900 |
| C   | -2.58146500 | -0.29035400 | -3.63371300 |
| O   | -3.38943400 | 1.08070700  | 1.88079000  |
| C   | -2.38271300 | 1.42048900  | 2.73401200  |
| C   | -2.71002300 | 2.69064700  | 3.47342300  |
| O   | -1.37055900 | 0.76432200  | 2.85493700  |
| H   | -4.90707800 | -1.11117300 | 2.01567200  |
| H   | -5.51068100 | -1.52640300 | -1.48442500 |
| H   | -2.63576900 | -0.82411900 | 1.78866800  |
| H   | -6.56783100 | -0.59001400 | 0.09897000  |
| H   | -7.38268900 | 1.35054800  | 1.33577800  |
| H   | -6.79993400 | 0.11576800  | 2.45840500  |
| H   | -5.81902600 | 1.55879800  | 2.13872600  |
| H   | -6.38374600 | 1.63190500  | -0.91662400 |
| H   | -5.04802200 | 0.63825900  | -1.50113100 |
| H   | -4.76465900 | 1.86564100  | -0.25538400 |
| H   | -4.00701000 | -3.25386200 | 2.02456400  |
| H   | -3.80907600 | -4.19981000 | 0.54968000  |
| H   | -2.60237400 | -2.99384300 | 0.99029800  |
| H   | -4.26387400 | -4.37005500 | -1.46654000 |
| H   | -5.19162000 | -4.48531100 | -3.71339800 |
| H   | -5.87326700 | -2.77425900 | -3.54731400 |
| H   | -1.56716200 | 1.44469900  | -2.95933600 |
| H   | -2.48043400 | -0.03814400 | -4.68477000 |
| H   | -3.09879600 | -1.21285500 | -3.38625800 |
| H   | -2.78234400 | 3.52373200  | 2.76598300  |
| H   | -1.92977200 | 2.89653300  | 4.20657800  |

|    |             |             |             |
|----|-------------|-------------|-------------|
| H  | -3.67974600 | 2.60060500  | 3.97258900  |
| H  | 0.33033300  | -5.78902500 | -0.58708300 |
| C  | 1.17250900  | -5.14815700 | -0.87477900 |
| C  | 0.98674700  | -3.75603400 | -0.24417500 |
| C  | 1.29522600  | -5.07359900 | -2.40204100 |
| H  | 2.07552100  | -5.61500800 | -0.45567600 |
| C  | 2.13775500  | -2.80525800 | -0.64882200 |
| H  | 0.92351300  | -3.85860900 | 0.84245900  |
| H  | 0.03301400  | -3.32456400 | -0.58010400 |
| C  | 2.40764900  | -4.10235000 | -2.81780200 |
| H  | 0.33948900  | -4.73413200 | -2.82757100 |
| H  | 1.48539600  | -6.07057300 | -2.81623400 |
| P  | 1.99226200  | -1.12767200 | 0.19219500  |
| C  | 2.21583100  | -2.71130000 | -2.18826900 |
| H  | 3.07474500  | -3.24334000 | -0.27824300 |
| H  | 2.44270100  | -4.00262400 | -3.90917400 |
| H  | 3.38293900  | -4.50722800 | -2.51100500 |
| Au | -0.17774800 | -0.30416100 | -0.16199900 |
| C  | 3.38176500  | -0.07713400 | -0.43491200 |
| C  | 2.34405600  | -1.35230900 | 2.02903000  |
| H  | 1.28234000  | -2.27029000 | -2.56372700 |
| H  | 3.02769400  | -2.04824100 | -2.50052400 |
| C  | 3.32996000  | 1.32844000  | -0.64166500 |
| C  | 4.59283600  | -0.75685500 | -0.68152500 |
| C  | 3.57767200  | -2.24636400 | 2.37948000  |
| C  | 1.08808900  | -1.74680100 | 2.84787000  |
| H  | 2.59471000  | -0.32741800 | 2.31687400  |
| C  | 2.12857700  | 2.23046800  | -0.47585700 |
| C  | 4.50699200  | 1.96761700  | -1.07254800 |
| C  | 5.73946900  | -0.09584900 | -1.11254700 |
| H  | 4.64849600  | -1.83111900 | -0.54753800 |
| C  | 3.17517400  | -3.57758300 | 3.03144200  |
| H  | 4.21479500  | -2.42998300 | 1.50948800  |
| H  | 4.20677100  | -1.68524000 | 3.08159700  |
| C  | 1.49927900  | -2.09484700 | 4.28729900  |
| H  | 0.57381300  | -2.60600100 | 2.40162500  |
| H  | 0.37285500  | -0.91905300 | 2.84359800  |
| C  | 1.34758000  | 2.55464500  | -1.63174000 |
| C  | 1.86314200  | 2.90714100  | 0.74643300  |
| C  | 5.69577600  | 1.28250200  | -1.30690000 |
| H  | 4.47683500  | 3.04326000  | -1.21470600 |
| H  | 6.65192400  | -0.65594400 | -1.29335800 |
| C  | 2.39013900  | -3.35953800 | 4.34379600  |
| H  | 2.56948700  | -4.16080700 | 2.32608200  |

|                  |             |             |             |
|------------------|-------------|-------------|-------------|
| H                | 4.07294900  | -4.17653400 | 3.22191800  |
| H                | 0.60489000  | -2.22887700 | 4.90567600  |
| H                | 2.03521100  | -1.23581600 | 4.71274600  |
| C                | 0.27624400  | 3.44658800  | -1.49705200 |
| C                | 1.62569800  | 2.14653800  | -3.09444400 |
| C                | 0.78116800  | 3.80587600  | 0.79209400  |
| C                | 2.64598100  | 2.87456400  | 2.08235400  |
| H                | 6.57789700  | 1.82268500  | -1.63815200 |
| H                | 1.77596100  | -4.24517300 | 4.54490400  |
| H                | 3.08899000  | -3.27477900 | 5.18423400  |
| C                | -0.03656600 | 4.08522500  | -0.29506500 |
| H                | -0.29991900 | 3.69217800  | -2.38686000 |
| H                | 0.67336700  | 2.33202200  | -3.60887800 |
| C                | 2.64305100  | 3.09832600  | -3.76292800 |
| C                | 1.97060900  | 0.68373600  | -3.40554400 |
| H                | 0.59793900  | 4.33758300  | 1.72353200  |
| C                | 4.07851300  | 2.32223700  | 2.12856400  |
| C                | 1.79167300  | 2.25503200  | 3.21118100  |
| H                | 2.75008300  | 3.93767000  | 2.34173600  |
| C                | -1.17008000 | 5.09648800  | -0.19019800 |
| H                | 2.66542200  | 2.92079200  | -4.84466000 |
| H                | 2.37591300  | 4.14715600  | -3.59691700 |
| H                | 3.65556700  | 2.93853000  | -3.38167000 |
| H                | 1.88950400  | 0.52003300  | -4.48685200 |
| H                | 1.27437500  | -0.00276300 | -2.91343100 |
| H                | 2.98716800  | 0.41547900  | -3.11198400 |
| H                | 4.48388200  | 2.50500300  | 3.13040100  |
| H                | 4.73610300  | 2.82106500  | 1.41302700  |
| H                | 4.14123700  | 1.24641200  | 1.94329900  |
| H                | 0.83802300  | 2.77553100  | 3.33198700  |
| H                | 1.54815900  | 1.20796100  | 3.01547300  |
| H                | 2.32939300  | 2.30995900  | 4.16479200  |
| C                | -0.87854900 | 6.36116700  | -1.02194700 |
| C                | -2.53278900 | 4.48915400  | -0.57339900 |
| H                | -1.22909500 | 5.40360600  | 0.86321700  |
| H                | 0.07032700  | 6.82041100  | -0.72546400 |
| H                | -0.81917700 | 6.12877000  | -2.09185800 |
| H                | -1.67378000 | 7.10287300  | -0.88599900 |
| H                | -3.33547000 | 5.21987100  | -0.42226600 |
| H                | -2.76081800 | 3.60136800  | 0.02804100  |
| H                | -2.55586500 | 4.19208800  | -1.62884100 |
| Ts <sub>1a</sub> |             |             |             |
| C                | -3.95391500 | -2.39593000 | 0.04603300  |
| C                | -4.52083400 | -1.69540500 | -1.17786700 |

|    |             |             |             |
|----|-------------|-------------|-------------|
| C  | -2.71325200 | -0.57983400 | -1.56183900 |
| C  | -4.92358200 | -0.36893100 | -1.08407300 |
| C  | -2.06718200 | -0.87113700 | -0.46330100 |
| C  | -2.81862500 | -1.54958700 | 0.67301300  |
| C  | -5.03050200 | -2.99063300 | 1.01230000  |
| C  | -4.35608400 | -3.76180600 | 2.16012500  |
| C  | -6.08121800 | -2.00571500 | 1.54851000  |
| C  | -4.84987900 | -2.56418200 | -2.36457100 |
| C  | -5.65823300 | 0.38346000  | -2.08574800 |
| C  | -6.12145500 | 1.62263800  | -1.84335100 |
| C  | -2.61990600 | -0.09057200 | -2.91402300 |
| C  | -1.83267200 | -0.66598500 | -3.83753000 |
| O  | -3.31891600 | -0.53444400 | 1.57835700  |
| C  | -2.56524500 | -0.27613500 | 2.69102200  |
| C  | -3.18282300 | 0.81869000  | 3.52228400  |
| O  | -1.53419000 | -0.85582100 | 2.94480500  |
| H  | -3.41494000 | -3.27171000 | -0.34058500 |
| H  | -4.77089100 | 0.13702200  | -0.13561800 |
| H  | -2.15448600 | -2.19184800 | 1.25002200  |
| H  | -5.57082400 | -3.73213700 | 0.40599500  |
| H  | -5.10762400 | -4.31137900 | 2.73645000  |
| H  | -3.62761900 | -4.49139900 | 1.78638000  |
| H  | -3.83688600 | -3.09152600 | 2.85453500  |
| H  | -6.81389700 | -2.55051800 | 2.15384600  |
| H  | -6.63317700 | -1.50926600 | 0.74278900  |
| H  | -5.63315700 | -1.23390600 | 2.17992800  |
| H  | -4.06507000 | -3.30827800 | -2.53232800 |
| H  | -5.78138300 | -3.11349900 | -2.16959100 |
| H  | -4.98493700 | -2.00054100 | -3.28955900 |
| H  | -5.87511000 | -0.08805700 | -3.04018300 |
| H  | -6.71017100 | 2.16179700  | -2.57911600 |
| H  | -5.93795500 | 2.12642200  | -0.89799100 |
| H  | -3.21442300 | 0.78297200  | -3.17300000 |
| H  | -1.74772800 | -0.24803100 | -4.83645300 |
| H  | -1.23685500 | -1.54533000 | -3.61141500 |
| H  | -2.92438300 | 1.78797300  | 3.08034700  |
| H  | -2.77661700 | 0.77494900  | 4.53384400  |
| H  | -4.27270400 | 0.73895100  | 3.54525200  |
| Au | 0.00192000  | -0.59667400 | -0.29721800 |
| H  | -1.75550300 | 6.40868300  | 0.93662100  |
| C  | -2.56442900 | 5.82389300  | 0.48654100  |
| C  | -2.51852400 | 4.35726400  | 0.95918200  |
| H  | -2.46022000 | 5.89185500  | -0.60292600 |
| H  | -3.51706700 | 6.29077400  | 0.76267600  |



|   |             |             |             |
|---|-------------|-------------|-------------|
| C | -1.16956100 | 3.71890400  | 0.65732000  |
| C | -3.69331300 | 3.55514900  | 0.37088200  |
| H | -2.63600700 | 4.36207800  | 2.05195600  |
| C | -0.74844900 | 3.45704400  | -0.64699300 |
| C | -0.26614200 | 3.44092500  | 1.67465000  |
| H | -4.64895400 | 4.00602300  | 0.66507700  |
| H | -3.67860000 | 2.51550600  | 0.71924600  |
| H | -3.65544800 | 3.54191600  | -0.72485300 |
| C | 0.52138300  | 2.95131800  | -0.95194200 |
| H | -1.40981300 | 3.70318300  | -1.47472400 |
| C | 1.01480400  | 2.90247500  | 1.45437500  |
| H | -0.54855800 | 3.68477000  | 2.69715200  |
| C | 0.83017100  | 2.95738000  | -2.46413800 |
| C | 1.41294000  | 2.62181100  | 0.11783700  |
| C | 1.80962800  | 2.75126900  | 2.77339900  |
| H | -0.16050200 | 2.95869400  | -2.93678400 |
| C | 1.50027100  | 4.28079600  | -2.89700000 |
| C | 1.56341000  | 1.75759600  | -3.07745500 |
| C | 2.82901900  | 2.20351300  | -0.21382700 |
| C | 3.34213600  | 2.64466900  | 2.75015900  |
| C | 1.19276700  | 1.63377000  | 3.64656000  |
| H | 1.60690400  | 3.68981300  | 3.30819300  |
| H | 1.52395200  | 4.34816500  | -3.99132500 |
| H | 0.95170900  | 5.14858200  | -2.51557400 |
| H | 2.53219400  | 4.34536400  | -2.54001500 |
| H | 1.48102900  | 1.81020100  | -4.17017400 |
| H | 1.11532500  | 0.81267700  | -2.75435200 |
| H | 2.62729000  | 1.74007900  | -2.83339600 |
| C | 3.71846700  | 3.27229200  | -0.43201500 |
| C | 3.33781900  | 0.88200100  | -0.34483400 |
| H | 3.70299900  | 2.66831700  | 3.78506300  |
| H | 3.80285700  | 3.48282600  | 2.22189300  |
| H | 3.71370700  | 1.72322900  | 2.29518400  |
| H | 0.14545000  | 1.84160900  | 3.88509600  |
| H | 1.20969900  | 0.66372900  | 3.14340300  |
| H | 1.73926500  | 1.54166700  | 4.59243800  |
| C | 5.05420600  | 3.08566500  | -0.77630300 |
| H | 3.33629900  | 4.28173400  | -0.31584100 |
| C | 4.69252800  | 0.71326800  | -0.69746900 |
| P | 2.36833200  | -0.67236900 | -0.04908000 |
| C | 5.54682300  | 1.79085700  | -0.91414600 |
| H | 5.70012600  | 3.94444000  | -0.93487100 |
| H | 5.09795100  | -0.28406100 | -0.82107500 |
| C | 3.05906600  | -1.96584900 | -1.23295400 |

|      |             |             |             |
|------|-------------|-------------|-------------|
| C    | 2.84862400  | -1.18610000 | 1.70241200  |
| H    | 6.58294900  | 1.61440000  | -1.18734200 |
| C    | 3.01523800  | -1.51133600 | -2.70801100 |
| C    | 2.33225800  | -3.32318000 | -1.08343800 |
| H    | 4.10859400  | -2.12225000 | -0.95008100 |
| C    | 4.32149300  | -1.66918000 | 1.90587500  |
| C    | 1.82357100  | -2.14719500 | 2.35584200  |
| H    | 2.74898100  | -0.23240700 | 2.22775400  |
| C    | 3.62700800  | -2.57287600 | -3.63847900 |
| H    | 1.96828500  | -1.34037700 | -2.99434700 |
| H    | 3.53674000  | -0.55875400 | -2.83887300 |
| C    | 2.93648300  | -4.38616000 | -2.01875800 |
| H    | 2.38179500  | -3.68310600 | -0.05226700 |
| H    | 1.26726100  | -3.18641300 | -1.31862100 |
| C    | 4.40875300  | -3.15389300 | 2.28994600  |
| H    | 4.94519000  | -1.47356900 | 1.02868800  |
| H    | 4.76498100  | -1.07121300 | 2.71205100  |
| C    | 2.34899700  | -2.61078100 | 3.72391300  |
| H    | 1.63726700  | -3.02209300 | 1.72316000  |
| H    | 0.86031100  | -1.63920700 | 2.46909900  |
| C    | 2.93152300  | -3.93147500 | -3.48362600 |
| H    | 3.56523900  | -2.22495500 | -4.67677600 |
| H    | 4.69728800  | -2.68153000 | -3.41026500 |
| H    | 2.38117400  | -5.32522500 | -1.90518600 |
| H    | 3.96937000  | -4.59646000 | -1.70548600 |
| C    | 3.64118300  | -3.45663000 | 3.59390500  |
| H    | 4.00964500  | -3.76650600 | 1.47157800  |
| H    | 5.46089300  | -3.44311500 | 2.39487700  |
| H    | 1.57051200  | -3.17808900 | 4.24592400  |
| H    | 2.54073700  | -1.72233700 | 4.34048700  |
| H    | 1.89223000  | -3.84941400 | -3.83552700 |
| H    | 3.41680500  | -4.68364700 | -4.11678700 |
| H    | 3.39865700  | -4.52545700 | 3.62596000  |
| H    | 4.28959000  | -3.26474000 | 4.45712300  |
| 2a-2 |             |             |             |
| C    | -4.01791900 | -2.40270900 | 0.42461800  |
| C    | -4.21273800 | -2.02603400 | -1.04831400 |
| C    | -2.80296600 | -1.35494500 | -1.48251000 |
| C    | -4.35564700 | -0.60229400 | -1.30317800 |
| C    | -2.03013000 | -1.15676200 | -0.33450600 |
| C    | -2.83453200 | -1.52429300 | 0.91283700  |
| C    | -5.30238900 | -2.51367900 | 1.28874300  |
| C    | -4.95259500 | -2.96462100 | 2.71776800  |
| C    | -6.21890100 | -1.27885200 | 1.30039300  |

|    |             |             |             |
|----|-------------|-------------|-------------|
| C  | -4.80618500 | -3.07734100 | -1.96269600 |
| C  | -4.91329500 | -0.02094900 | -2.52835200 |
| C  | -5.32786200 | 1.25315300  | -2.57915200 |
| C  | -2.27336600 | -1.40947700 | -2.86829700 |
| C  | -1.33247100 | -2.27920900 | -3.24968900 |
| O  | -3.23591000 | -0.29929200 | 1.57256900  |
| C  | -2.53031900 | 0.05343700  | 2.69590300  |
| C  | -3.04276300 | 1.34691000  | 3.27157900  |
| O  | -1.61338500 | -0.60113700 | 3.13406700  |
| H  | -3.59174300 | -3.41670000 | 0.40468300  |
| H  | -4.34328300 | 0.06727700  | -0.45079200 |
| H  | -2.20195300 | -2.07119400 | 1.61469400  |
| H  | -5.88035100 | -3.33083800 | 0.83285500  |
| H  | -5.86605000 | -3.17942800 | 3.28222700  |
| H  | -4.34274700 | -3.87591700 | 2.71580900  |
| H  | -4.40168200 | -2.19268800 | 3.26633400  |
| H  | -7.11383900 | -1.49435200 | 1.89436000  |
| H  | -6.55944200 | -1.00622300 | 0.29502200  |
| H  | -5.72644800 | -0.40863900 | 1.74328100  |
| H  | -4.29611300 | -4.03494100 | -1.81754200 |
| H  | -5.86713300 | -3.21865400 | -1.72565200 |
| H  | -4.72696700 | -2.81882700 | -3.02053000 |
| H  | -5.05259900 | -0.66517800 | -3.39138800 |
| H  | -5.80896900 | 1.65443800  | -3.46589600 |
| H  | -5.21568300 | 1.92685000  | -1.73411700 |
| H  | -2.67304200 | -0.70601000 | -3.59501200 |
| H  | -0.95394200 | -2.28548800 | -4.26774200 |
| H  | -0.91083900 | -3.00919400 | -2.56363700 |
| H  | -2.58507400 | 2.17800000  | 2.72260500  |
| H  | -2.74821600 | 1.41440100  | 4.31997300  |
| H  | -4.12784700 | 1.42906000  | 3.17295100  |
| Au | -0.04722200 | -0.70614500 | -0.19717400 |
| H  | -1.71600200 | 6.58568200  | 0.36841500  |
| C  | -2.55723300 | 6.01218400  | -0.03448800 |
| C  | -2.59327300 | 4.58847800  | 0.55743400  |
| H  | -2.44991700 | 5.98173900  | -1.12531600 |
| H  | -3.48173300 | 6.55328100  | 0.19830900  |
| C  | -1.27766700 | 3.86200600  | 0.30854200  |
| C  | -3.81560400 | 3.81265400  | 0.03674100  |
| H  | -2.70584000 | 4.68953800  | 1.64594400  |
| C  | -0.90257600 | 3.40990500  | -0.95688200 |
| C  | -0.34935700 | 3.70243100  | 1.33066400  |
| H  | -4.74229600 | 4.33366200  | 0.30331300  |
| H  | -3.85642600 | 2.80174200  | 0.46023000  |

|   |             |             |             |
|---|-------------|-------------|-------------|
| H | -3.79014700 | 3.72313300  | -1.05581000 |
| C | 0.35243300  | 2.84658400  | -1.22564500 |
| H | -1.58415300 | 3.55178500  | -1.79254600 |
| C | 0.91761900  | 3.11935300  | 1.14934900  |
| H | -0.59779100 | 4.08523000  | 2.31913600  |
| C | 0.61006300  | 2.63469200  | -2.73203300 |
| C | 1.27788600  | 2.66424800  | -0.15038600 |
| C | 1.74007600  | 3.10889200  | 2.45932900  |
| H | -0.39505700 | 2.53578800  | -3.16240400 |
| C | 1.22161500  | 3.89881800  | -3.37734700 |
| C | 1.36759300  | 1.38145400  | -3.18780600 |
| C | 2.69758000  | 2.24290300  | -0.46628100 |
| C | 3.27267000  | 3.00796600  | 2.41742300  |
| C | 1.13957100  | 2.08078900  | 3.44763600  |
| H | 1.54261400  | 4.09488200  | 2.90216700  |
| H | 1.21931600  | 3.80072300  | -4.46951600 |
| H | 0.65126000  | 4.79649400  | -3.11611900 |
| H | 2.25806900  | 4.04928500  | -3.06100000 |
| H | 1.24874500  | 1.26860300  | -4.27241500 |
| H | 0.96541000  | 0.48028300  | -2.71398700 |
| H | 2.43830300  | 1.43583500  | -2.98206900 |
| C | 3.54272500  | 3.30725900  | -0.83415600 |
| C | 3.25296600  | 0.93451200  | -0.44449500 |
| H | 3.65283600  | 3.14709500  | 3.43614900  |
| H | 3.71630600  | 3.78616000  | 1.79159900  |
| H | 3.64298100  | 2.04491200  | 2.05878700  |
| H | 0.11009600  | 2.33945000  | 3.71398300  |
| H | 1.10807700  | 1.07313600  | 3.02386500  |
| H | 1.72454400  | 2.04859800  | 4.37417300  |
| C | 4.87993200  | 3.12801100  | -1.17611800 |
| H | 3.12369200  | 4.30877700  | -0.83838200 |
| C | 4.60990200  | 0.77339700  | -0.79307300 |
| P | 2.34583100  | -0.61008500 | 0.04549600  |
| C | 5.42078600  | 1.84538800  | -1.15546900 |
| H | 5.48984500  | 3.98308600  | -1.45298500 |
| H | 5.05257600  | -0.21580800 | -0.79632000 |
| C | 3.09148000  | -2.00503200 | -0.98273200 |
| C | 2.85182400  | -0.89401500 | 1.84125900  |
| H | 6.46013500  | 1.67359500  | -1.41910600 |
| C | 3.05391200  | -1.72130400 | -2.50037300 |
| C | 2.40511300  | -3.36140000 | -0.69304300 |
| H | 4.14095100  | -2.09589600 | -0.67140800 |
| C | 4.34255100  | -1.28662200 | 2.08995800  |
| C | 1.87044500  | -1.82044100 | 2.60581800  |

|                     |             |             |             |
|---------------------|-------------|-------------|-------------|
| H                   | 2.71147100  | 0.10844800  | 2.25391300  |
| C                   | 3.72128200  | -2.85718000 | -3.29530700 |
| H                   | 2.00695200  | -1.62504300 | -2.81875200 |
| H                   | 3.54135400  | -0.77044900 | -2.73346700 |
| C                   | 3.06445100  | -4.50113700 | -1.49071400 |
| H                   | 2.44065500  | -3.59996500 | 0.37314500  |
| H                   | 1.34175300  | -3.28949100 | -0.96266300 |
| C                   | 4.50108000  | -2.73620800 | 2.57261300  |
| H                   | 4.96504200  | -1.11165400 | 1.20764900  |
| H                   | 4.74347200  | -0.61559600 | 2.86024700  |
| C                   | 2.44310100  | -2.15120000 | 3.99311300  |
| H                   | 1.68985300  | -2.75282400 | 2.05829900  |
| H                   | 0.89625600  | -1.32908500 | 2.70069200  |
| C                   | 3.07296300  | -4.21553800 | -2.99781200 |
| H                   | 3.66586800  | -2.63124000 | -4.36711700 |
| H                   | 4.79056200  | -2.89843900 | -3.04144900 |
| H                   | 2.54034000  | -5.44132300 | -1.27958200 |
| H                   | 4.09729900  | -4.63576500 | -1.13810300 |
| C                   | 3.74471100  | -2.98433400 | 3.89617800  |
| H                   | 4.13441600  | -3.42191300 | 1.79819100  |
| H                   | 5.56555400  | -2.96647000 | 2.69628700  |
| H                   | 1.69193300  | -2.68293500 | 4.58750200  |
| H                   | 2.63750500  | -1.20902700 | 4.52307700  |
| H                   | 2.03859500  | -4.21300700 | -3.37291600 |
| H                   | 3.59734200  | -5.01543100 | -3.53375000 |
| H                   | 3.51525600  | -4.05303600 | 3.98320900  |
| H                   | 4.39429100  | -2.74120000 | 4.74536300  |
| Ts <sub>2a</sub> -2 |             |             |             |
| C                   | -3.83777600 | -2.39685000 | -0.31692500 |
| C                   | -4.13830800 | -1.29769200 | -1.35561800 |
| C                   | -3.03664000 | -0.12809300 | -1.12359900 |
| C                   | -4.60174800 | 0.01630200  | -0.82373900 |
| C                   | -2.19712800 | -0.58713300 | -0.03333000 |
| C                   | -2.91432100 | -1.73620900 | 0.72988800  |
| C                   | -5.04195000 | -3.25652600 | 0.16938500  |
| C                   | -4.57929400 | -4.31120400 | 1.19721900  |
| C                   | -6.26082600 | -2.46967100 | 0.69213600  |
| C                   | -5.37817800 | 0.98448900  | -1.63382500 |
| C                   | -6.24355200 | 1.85589400  | -1.09559600 |
| C                   | -2.47903900 | 0.70082100  | -2.23275200 |
| C                   | -1.78239800 | 0.21783800  | -3.26961000 |
| O                   | -3.65966600 | -1.21663800 | 1.93663700  |
| C                   | -3.33676200 | 0.04664800  | 2.29794300  |
| C                   | -3.96014900 | 0.52046100  | 3.56776700  |

|    |             |             |             |
|----|-------------|-------------|-------------|
| O  | -2.56377000 | 0.71896600  | 1.57320400  |
| H  | -3.16665600 | -3.10611700 | -0.82897900 |
| H  | -4.85426200 | 0.05286200  | 0.22835000  |
| H  | -2.21063300 | -2.44358700 | 1.16489000  |
| H  | -5.37535300 | -3.80214800 | -0.72695900 |
| H  | -5.39198000 | -5.01274100 | 1.41249200  |
| H  | -3.72863300 | -4.89489500 | 0.82332900  |
| H  | -4.28819500 | -3.84058300 | 2.14316300  |
| H  | -7.07540300 | -3.16853000 | 0.91343300  |
| H  | -6.63721300 | -1.75348800 | -0.04594800 |
| H  | -6.02618400 | -1.93017500 | 1.61419300  |
| H  | -5.23725500 | 0.96777100  | -2.71104000 |
| H  | -6.81701400 | 2.54091200  | -1.71047300 |
| H  | -6.41615800 | 1.91154400  | -0.02382400 |
| H  | -2.66156700 | 1.77109200  | -2.15694900 |
| H  | -1.38700800 | 0.87196900  | -4.03996600 |
| H  | -1.57644100 | -0.84293200 | -3.38520200 |
| H  | -3.79639000 | 1.59102200  | 3.68558400  |
| H  | -3.51034500 | -0.00970100 | 4.41510900  |
| H  | -5.03046100 | 0.29654700  | 3.57502600  |
| Au | -0.14194300 | -0.52454600 | -0.03267100 |
| H  | -0.87346400 | 6.77467700  | 0.99736300  |
| C  | -1.74872000 | 6.31870200  | 0.52231200  |
| C  | -1.92067900 | 4.84551000  | 0.96387700  |
| H  | -1.61773300 | 6.39011400  | -0.56427500 |
| H  | -2.63230800 | 6.90791700  | 0.79420700  |
| C  | -0.66850600 | 4.02773500  | 0.66167400  |
| C  | -3.19354200 | 4.23062400  | 0.34214800  |
| H  | -2.05101600 | 4.84167600  | 2.05587100  |
| C  | -0.27637800 | 3.72868100  | -0.64613200 |
| C  | 0.17384800  | 3.60148600  | 1.68508200  |
| H  | -4.07934100 | 4.80376400  | 0.64090500  |
| H  | -3.32336400 | 3.19183600  | 0.66284000  |
| H  | -3.14837100 | 4.24595300  | -0.75372200 |
| C  | 0.91143500  | 3.04327600  | -0.95029800 |
| H  | -0.88860700 | 4.07631200  | -1.47382700 |
| C  | 1.37066300  | 2.89258800  | 1.46092800  |
| H  | -0.08994700 | 3.84953800  | 2.71042000  |
| C  | 1.21734700  | 2.99559300  | -2.46481000 |
| C  | 1.74526500  | 2.58016200  | 0.12026200  |
| C  | 2.11493000  | 2.57600800  | 2.78153800  |
| H  | 0.23310300  | 3.12190400  | -2.93789800 |
| C  | 2.06134200  | 4.21479100  | -2.91888600 |
| C  | 1.78732000  | 1.69358600  | -3.05147000 |

|   |            |             |             |
|---|------------|-------------|-------------|
| C | 3.10281400 | 1.99279600  | -0.20801000 |
| C | 3.63728000 | 2.34128500  | 2.77159100  |
| C | 1.37799600 | 1.44254200  | 3.54251200  |
| H | 1.97582200 | 3.48228700  | 3.38924900  |
| H | 2.08643300 | 4.26505100  | -4.01423500 |
| H | 1.63609200 | 5.15198100  | -2.54431800 |
| H | 3.09384100 | 4.13965000  | -2.56556000 |
| H | 1.69648800 | 1.72041200  | -4.14471700 |
| H | 1.23021900 | 0.82468600  | -2.68888700 |
| H | 2.84429800 | 1.55555400  | -2.81617200 |
| C | 4.12046100 | 2.94739700  | -0.43433500 |
| C | 3.45350900 | 0.62117200  | -0.33162700 |
| H | 3.98552100 | 2.28109900  | 3.80976800  |
| H | 4.17081900 | 3.16557200  | 2.29104200  |
| H | 3.93441500 | 1.41757600  | 2.26941200  |
| H | 0.34354700 | 1.72715500  | 3.76073200  |
| H | 1.34097300 | 0.52557500  | 2.94736000  |
| H | 1.88110500 | 1.22301600  | 4.49188400  |
| C | 5.42405100 | 2.59348300  | -0.78141700 |
| H | 3.86433700 | 3.99522400  | -0.32365800 |
| C | 4.77337500 | 0.27717500  | -0.69238400 |
| P | 2.28663600 | -0.84222700 | -0.00550100 |
| C | 5.75425800 | 1.24393800  | -0.91847700 |
| H | 6.17066500 | 3.36340200  | -0.94456700 |
| H | 5.04652400 | -0.76356200 | -0.81302900 |
| C | 2.76722300 | -2.21438200 | -1.28655600 |
| C | 2.87190900 | -1.50746700 | 1.73404300  |
| H | 6.75836400 | 0.94282300  | -1.19689500 |
| C | 2.76747200 | -1.70079500 | -2.74205100 |
| C | 1.83236200 | -3.44042000 | -1.15545700 |
| H | 3.78542800 | -2.52820600 | -1.02106400 |
| C | 4.25728900 | -2.22799200 | 1.76176900  |
| C | 1.76967000 | -2.34716800 | 2.42758700  |
| H | 2.97116300 | -0.57310400 | 2.29378600  |
| C | 3.19610500 | -2.81845700 | -3.71851400 |
| H | 1.75530500 | -1.36329400 | -3.00398100 |
| H | 3.43039900 | -0.83732800 | -2.85135400 |
| C | 2.24958300 | -4.56130500 | -2.13416700 |
| H | 1.83699300 | -3.83054700 | -0.13288000 |
| H | 0.80070500 | -3.12670300 | -1.37262400 |
| C | 4.13789700 | -3.73867100 | 2.04320500  |
| H | 4.82471100 | -2.06567500 | 0.84079900  |
| H | 4.86010100 | -1.76963100 | 2.55731500  |
| C | 2.33096200 | -2.98604600 | 3.71508700  |

|   |             |             |             |
|---|-------------|-------------|-------------|
| H | 1.39203800  | -3.13575500 | 1.76530600  |
| H | 0.91317300  | -1.70256300 | 2.65885600  |
| C | 2.29553300  | -4.06090200 | -3.58958700 |
| H | 3.17202500  | -2.43309600 | -4.74529700 |
| H | 4.23995400  | -3.09976900 | -3.51385200 |
| H | 1.55337100  | -5.40429000 | -2.04003400 |
| H | 3.24127100  | -4.94106900 | -1.84652300 |
| C | 3.45226600  | -4.01660100 | 3.40308400  |
| H | 3.57172800  | -4.21943300 | 1.23452900  |
| H | 5.13509700  | -4.19421100 | 2.02654600  |
| H | 1.52134400  | -3.46424000 | 4.27898400  |
| H | 2.72275700  | -2.18636500 | 4.35892700  |
| H | 1.27673800  | -3.80579900 | -3.91899200 |
| H | 2.65012600  | -4.85869100 | -4.25325400 |
| H | 3.03905100  | -5.03277100 | 3.39654600  |
| H | 4.19985700  | -3.99275500 | 4.20550400  |
| C | -4.49404800 | -1.76575000 | -2.74837600 |
| H | -5.52918300 | -2.12879400 | -2.76580800 |
| H | -4.40613800 | -0.97204100 | -3.49235300 |
| H | -3.84315000 | -2.58983600 | -3.06073900 |

3a-2

|   |            |             |             |
|---|------------|-------------|-------------|
| C | 3.63769800 | -2.37363300 | -0.08257000 |
| C | 3.92386600 | -1.52332400 | 1.16892500  |
| C | 3.03929300 | -0.26948500 | 1.10254700  |
| C | 4.57220400 | -0.16899700 | 0.92896800  |
| C | 2.22543200 | -0.34232500 | -0.18593500 |
| C | 2.86234300 | -1.46119800 | -1.03809800 |
| C | 4.79030000 | -3.24625700 | -0.65142000 |
| C | 4.32703900 | -4.04947800 | -1.87894200 |
| C | 6.10501300 | -2.50263700 | -0.93942000 |
| C | 4.21677200 | -2.31040300 | 2.43099100  |
| C | 5.40095100 | 0.50063400  | 1.96075400  |
| C | 6.53216500 | 1.15783400  | 1.68841500  |
| C | 2.41218300 | 0.40289800  | 2.28274000  |
| C | 1.82585100 | -0.20828500 | 3.31522200  |
| O | 3.70721400 | -0.71064400 | -2.04539800 |
| C | 3.41129400 | 0.54500300  | -1.96470000 |
| C | 3.99154900 | 1.51410500  | -2.93011700 |
| O | 2.59481600 | 0.89912300  | -1.05856300 |
| H | 2.86041800 | -3.09153200 | 0.22736900  |
| H | 4.95421400 | 0.00989700  | -0.07247700 |
| H | 2.17527200 | -2.00718400 | -1.68211200 |
| H | 5.00714600 | -3.97346500 | 0.14324300  |
| H | 5.08962400 | -4.78114100 | -2.16554400 |



|    |             |             |             |
|----|-------------|-------------|-------------|
| H  | 3.39994500  | -4.60095500 | -1.67847300 |
| H  | 4.15752100  | -3.40045600 | -2.74685600 |
| H  | 6.87322600  | -3.22360600 | -1.24022300 |
| H  | 6.47845900  | -1.97252200 | -0.05781500 |
| H  | 5.99913800  | -1.78076600 | -1.75632000 |
| H  | 3.45642400  | -3.08358000 | 2.59696500  |
| H  | 5.18771500  | -2.81247400 | 2.34742500  |
| H  | 4.25004700  | -1.67810000 | 3.31940300  |
| H  | 5.05091000  | 0.45115400  | 2.98915100  |
| H  | 7.11433900  | 1.63404400  | 2.47123400  |
| H  | 6.92253300  | 1.24061500  | 0.67588900  |
| H  | 2.43971800  | 1.49277200  | 2.26077700  |
| H  | 1.38308200  | 0.36143600  | 4.12742100  |
| H  | 1.76276500  | -1.29026400 | 3.39034800  |
| H  | 3.99474700  | 2.51686000  | -2.50059300 |
| H  | 3.37262700  | 1.51998700  | -3.83602800 |
| H  | 5.00023000  | 1.20450300  | -3.21221900 |
| Au | 0.11936500  | -0.45101500 | -0.03421200 |
| H  | 0.59463400  | 6.72595100  | -1.28291900 |
| C  | 1.45718500  | 6.43448100  | -0.67443300 |
| C  | 1.81269900  | 4.94763800  | -0.88456300 |
| H  | 1.20814100  | 6.63038800  | 0.37520400  |
| H  | 2.30135200  | 7.07860000  | -0.94699800 |
| C  | 0.61097500  | 4.06167000  | -0.58075200 |
| C  | 3.07081200  | 4.57410100  | -0.08166000 |
| H  | 2.04575200  | 4.81677800  | -1.95146300 |
| C  | 0.24116700  | 3.72148900  | 0.71964800  |
| C  | -0.23029800 | 3.63243100  | -1.60082100 |
| H  | 3.92686100  | 5.17273000  | -0.41363900 |
| H  | 3.32403100  | 3.51365000  | -0.19506300 |
| H  | 2.93975900  | 4.76881200  | 0.98891700  |
| C  | -0.91967500 | 2.99590700  | 1.02118900  |
| H  | 0.84981300  | 4.07112100  | 1.54988500  |
| C  | -1.40140300 | 2.88686000  | -1.38191700 |
| H  | 0.00937800  | 3.91815200  | -2.62404800 |
| C  | -1.20269200 | 2.91460800  | 2.53540600  |
| C  | -1.74675400 | 2.53094200  | -0.04812400 |
| C  | -2.15718000 | 2.59442300  | -2.69722400 |
| H  | -0.21622000 | 3.05396900  | 2.99600500  |
| C  | -2.05934000 | 4.10611800  | 3.01867200  |
| C  | -1.73149300 | 1.59719800  | 3.11412500  |
| C  | -3.07831300 | 1.89061700  | 0.28595200  |
| C  | -3.66919500 | 2.32297800  | -2.67382900 |
| C  | -1.40771600 | 1.51524200  | -3.51108200 |

|   |             |             |             |
|---|-------------|-------------|-------------|
| H | -2.05345800 | 3.52347900  | -3.27388600 |
| H | -2.07122300 | 4.13767000  | 4.11468300  |
| H | -1.65824600 | 5.05880000  | 2.65667000  |
| H | -3.09583300 | 4.02083300  | 2.67960200  |
| H | -1.62759500 | 1.61882600  | 4.20597600  |
| H | -1.15496400 | 0.74574300  | 2.74132700  |
| H | -2.78755200 | 1.43009200  | 2.89347800  |
| C | -4.11081300 | 2.81103600  | 0.55093000  |
| C | -3.38754000 | 0.50587900  | 0.38936200  |
| H | -4.03048300 | 2.28918200  | -3.70841500 |
| H | -4.21595800 | 3.11784600  | -2.15990900 |
| H | -3.94104500 | 1.37684500  | -2.20005400 |
| H | -0.38530200 | 1.83519000  | -3.73938400 |
| H | -1.33369400 | 0.57474700  | -2.95739500 |
| H | -1.91927600 | 1.31842100  | -4.46084500 |
| C | -5.39455400 | 2.42249900  | 0.92254500  |
| H | -3.88407000 | 3.86814600  | 0.45396200  |
| C | -4.69027200 | 0.13257200  | 0.78042600  |
| P | -2.22767800 | -0.89185800 | 0.00647300  |
| C | -5.68663900 | 1.06685100  | 1.04784900  |
| H | -6.15491500 | 3.17354200  | 1.11658900  |
| H | -4.93750100 | -0.91616900 | 0.89598500  |
| C | -2.61703600 | -2.27189200 | 1.23267700  |
| C | -2.80292900 | -1.50109200 | -1.69464300 |
| H | -6.67552200 | 0.73444900  | 1.34934900  |
| C | -2.59388600 | -1.80919000 | 2.70453000  |
| C | -1.66044100 | -3.47481300 | 1.05341300  |
| H | -3.63248800 | -2.61815300 | 0.99598400  |
| C | -4.18598100 | -2.22603100 | -1.75529200 |
| C | -1.70903700 | -2.30166700 | -2.44790200 |
| H | -2.91608900 | -0.55314600 | -2.22861100 |
| C | -2.97218500 | -2.95912100 | 3.65442900  |
| H | -1.58395500 | -1.45605400 | 2.95153000  |
| H | -3.27042800 | -0.96382200 | 2.85783100  |
| C | -2.02751800 | -4.62691900 | 2.00654200  |
| H | -1.67778100 | -3.84128400 | 0.02307500  |
| H | -0.63135900 | -3.14330200 | 1.25286900  |
| C | -4.05865400 | -3.72516400 | -2.06424100 |
| H | -4.76598800 | -2.08081000 | -0.84049000 |
| H | -4.77948200 | -1.75385100 | -2.54836500 |
| C | -2.29053700 | -2.90939300 | -3.73427700 |
| H | -1.29704300 | -3.10188600 | -1.82255600 |
| H | -0.86989300 | -1.63583000 | -2.68025100 |
| C | -2.05170000 | -4.17276600 | 3.47146000  |

|                     |             |             |             |
|---------------------|-------------|-------------|-------------|
| H                   | -2.93383500 | -2.60097300 | 4.69023100  |
| H                   | -4.01401300 | -3.25748900 | 3.46693200  |
| H                   | -1.31552300 | -5.45029500 | 1.87036900  |
| H                   | -3.01555100 | -5.02215100 | 1.72930300  |
| C                   | -3.37427100 | -3.97205300 | -3.42586700 |
| H                   | -3.48933200 | -4.21620500 | -1.26484200 |
| H                   | -5.05218200 | -4.18760300 | -2.05211800 |
| H                   | -1.48735200 | -3.34772200 | -4.33765400 |
| H                   | -2.71855600 | -2.09907800 | -4.33975700 |
| H                   | -1.03217000 | -3.90452800 | 3.78567800  |
| H                   | -2.37192500 | -4.99706800 | 4.11951000  |
| H                   | -2.93087400 | -4.97479800 | -3.42963000 |
| H                   | -4.12449700 | -3.96605300 | -4.22520000 |
| T <sub>S3a</sub> -2 |             |             |             |
| C                   | 3.28732200  | -2.43096800 | -0.04977800 |
| C                   | 3.69899500  | -1.59681300 | 1.18271300  |
| C                   | 3.07915600  | -0.20432100 | 1.03585900  |
| C                   | 4.60195700  | -0.39249300 | 0.90187400  |
| C                   | 2.30282400  | -0.21890100 | -0.28007800 |
| C                   | 2.66831400  | -1.43204000 | -0.98596500 |
| C                   | 4.30332800  | -3.46785600 | -0.62553000 |
| C                   | 3.71633900  | -4.19523300 | -1.84623400 |
| C                   | 5.70556400  | -2.91995700 | -0.92798600 |
| C                   | 3.81806800  | -2.37028300 | 2.48013400  |
| C                   | 5.52105200  | 0.14356100  | 1.93507300  |
| C                   | 6.76058900  | 0.56798400  | 1.67133200  |
| C                   | 2.54133400  | 0.63268400  | 2.15098900  |
| C                   | 1.83646600  | 0.19074200  | 3.19589500  |
| O                   | 3.92396900  | -0.49381600 | -2.19081100 |
| C                   | 3.51632400  | 0.66981600  | -2.03503600 |
| C                   | 4.03683800  | 1.83834300  | -2.80942800 |
| O                   | 2.57802400  | 0.94068100  | -1.14138400 |
| H                   | 2.42243500  | -3.05080000 | 0.25179600  |
| H                   | 5.01902200  | -0.32936400 | -0.09717300 |
| H                   | 2.16305600  | -1.75945200 | -1.88557900 |
| H                   | 4.41396400  | -4.21289800 | 0.17411700  |
| H                   | 4.35638000  | -5.03719300 | -2.12945700 |
| H                   | 2.71534500  | -4.59671500 | -1.64274000 |
| H                   | 3.64994700  | -3.53223600 | -2.71745000 |
| H                   | 6.34900700  | -3.74228600 | -1.26036900 |
| H                   | 6.17154600  | -2.47557400 | -0.04360700 |
| H                   | 5.68808200  | -2.17020800 | -1.72495000 |
| H                   | 2.91937000  | -2.97336300 | 2.66254200  |
| H                   | 4.67391300  | -3.05443000 | 2.43880100  |

|    |             |             |             |
|----|-------------|-------------|-------------|
| H  | 3.96220000  | -1.71789100 | 3.34254100  |
| H  | 5.14878100  | 0.19962100  | 2.95573100  |
| H  | 7.40575500  | 0.95655300  | 2.45332100  |
| H  | 7.17880900  | 0.53910900  | 0.66708800  |
| H  | 2.74913900  | 1.69971500  | 2.06745200  |
| H  | 1.47594800  | 0.87342900  | 3.96015200  |
| H  | 1.59611900  | -0.86008000 | 3.33130000  |
| H  | 4.77415400  | 2.36677800  | -2.19352000 |
| H  | 3.22391600  | 2.53490100  | -3.02730900 |
| H  | 4.51718400  | 1.49873000  | -3.72748400 |
| Au | 0.15271000  | -0.41824100 | -0.05780700 |
| H  | 0.62342300  | 6.74716200  | -1.25944800 |
| C  | 1.47866100  | 6.45855500  | -0.63932700 |
| C  | 1.83833500  | 4.97130200  | -0.83888800 |
| H  | 1.21696100  | 6.65862000  | 0.40647300  |
| H  | 2.32569600  | 7.10196900  | -0.90428700 |
| C  | 0.63521500  | 4.08430000  | -0.54492200 |
| C  | 3.08655200  | 4.60028700  | -0.01989500 |
| H  | 2.08452000  | 4.83603900  | -1.90226600 |
| C  | 0.25805200  | 3.74267300  | 0.75260600  |
| C  | -0.19717700 | 3.65149500  | -1.57111700 |
| H  | 3.94800300  | 5.19298700  | -0.34817000 |
| H  | 3.33522900  | 3.53844100  | -0.12648900 |
| H  | 2.94474900  | 4.80487800  | 1.04757600  |
| C  | -0.90030000 | 3.01011700  | 1.04622700  |
| H  | 0.85921000  | 4.09464500  | 1.58712800  |
| C  | -1.36524600 | 2.89921900  | -1.36075700 |
| H  | 0.04812700  | 3.93849500  | -2.59259400 |
| C  | -1.19364700 | 2.93181000  | 2.55869600  |
| C  | -1.71595700 | 2.53894200  | -0.02909300 |
| C  | -2.11395900 | 2.60605800  | -2.67965200 |
| H  | -0.20644700 | 3.04525700  | 3.02474400  |
| C  | -2.02362600 | 4.14498300  | 3.03493200  |
| C  | -1.76099300 | 1.62997100  | 3.13595600  |
| C  | -3.04341500 | 1.88927100  | 0.30069400  |
| C  | -3.62558300 | 2.33218000  | -2.66117200 |
| C  | -1.35933100 | 1.52996800  | -3.49231100 |
| H  | -2.00995100 | 3.53607000  | -3.25458500 |
| H  | -2.05007600 | 4.17390800  | 4.13073800  |
| H  | -1.59248500 | 5.08745900  | 2.68120700  |
| H  | -3.05740500 | 4.08855200  | 2.68104300  |
| H  | -1.64966500 | 1.64431000  | 4.22709600  |
| H  | -1.21415500 | 0.76222700  | 2.75710700  |
| H  | -2.82324800 | 1.49618600  | 2.92133400  |

|   |             |             |             |
|---|-------------|-------------|-------------|
| C | -4.08322300 | 2.80074500  | 0.56752200  |
| C | -3.34079100 | 0.50242700  | 0.40882500  |
| H | -3.98398000 | 2.29869400  | -3.69670400 |
| H | -4.17537000 | 3.12563500  | -2.14810400 |
| H | -3.89752200 | 1.38504800  | -2.18913200 |
| H | -0.33446700 | 1.84829000  | -3.71044200 |
| H | -1.29139800 | 0.58658600  | -2.94254900 |
| H | -1.86365100 | 1.33794600  | -4.44687000 |
| C | -5.36100500 | 2.40167400  | 0.94812000  |
| H | -3.86621600 | 3.85949500  | 0.46679100  |
| C | -4.63679300 | 0.11757300  | 0.81170800  |
| P | -2.18023400 | -0.88766000 | 0.01168200  |
| C | -5.63944500 | 1.04390100  | 1.08269400  |
| H | -6.12719500 | 3.14633300  | 1.14364900  |
| H | -4.87357900 | -0.93285500 | 0.93399700  |
| C | -2.53847800 | -2.27418800 | 1.23921300  |
| C | -2.75958100 | -1.49320800 | -1.68838300 |
| H | -6.62273900 | 0.70380000  | 1.39355200  |
| C | -2.50426200 | -1.81487100 | 2.71189700  |
| C | -1.57550300 | -3.46938900 | 1.04609400  |
| H | -3.55359400 | -2.62692400 | 1.01065300  |
| C | -4.14292400 | -2.21876800 | -1.73833700 |
| C | -1.67146300 | -2.29196000 | -2.45180600 |
| H | -2.87736700 | -0.54349300 | -2.21811100 |
| C | -2.86473700 | -2.97021700 | 3.66223400  |
| H | -1.49413100 | -1.45569200 | 2.95044500  |
| H | -3.18449200 | -0.97429200 | 2.87415300  |
| C | -1.92436700 | -4.62651500 | 2.00017900  |
| H | -1.60091100 | -3.83319200 | 0.01507600  |
| H | -0.54677800 | -3.13060300 | 1.23657000  |
| C | -4.01652300 | -3.71880100 | -2.04256400 |
| H | -4.71895100 | -2.06889900 | -0.82180800 |
| H | -4.73934200 | -1.74904200 | -2.53055300 |
| C | -2.26557100 | -2.90347200 | -3.73066600 |
| H | -1.25084800 | -3.09020100 | -1.82995000 |
| H | -0.83736300 | -1.62418300 | -2.69628500 |
| C | -1.93739000 | -4.17654500 | 3.46646900  |
| H | -2.81827800 | -2.61425800 | 4.69834300  |
| H | -3.90627300 | -3.27526800 | 3.48457600  |
| H | -1.20782200 | -5.44419000 | 1.85441000  |
| H | -2.91200200 | -5.02813800 | 1.73122100  |
| C | -3.34211800 | -3.96919300 | -3.40862500 |
| H | -3.44110000 | -4.20675100 | -1.24552600 |
| H | -5.00963000 | -4.18166000 | -2.02139000 |

|      |             |             |             |
|------|-------------|-------------|-------------|
| H    | -1.46734600 | -3.33979100 | -4.34176300 |
| H    | -2.70241100 | -2.09543300 | -4.33270400 |
| H    | -0.91677500 | -3.90230200 | 3.77192900  |
| H    | -2.24540400 | -5.00502100 | 4.11493000  |
| H    | -2.89462600 | -4.97005400 | -3.41164500 |
| H    | -4.09875400 | -3.96968000 | -4.20179100 |
| 1d-2 |             |             |             |
| C    | -4.70282000 | 0.79479300  | 0.21409200  |
| C    | -4.75691600 | -0.46239900 | -0.66429100 |
| C    | -4.89861200 | -1.65759700 | -0.04517900 |
| C    | -2.24606900 | 1.29863300  | -0.44697200 |
| C    | -3.22724300 | 1.07164400  | 0.64608400  |
| C    | -5.54462700 | 2.00555500  | -0.31320100 |
| C    | -6.23570500 | 2.75573700  | 0.84103600  |
| C    | -4.80906100 | 3.00249200  | -1.22298100 |
| C    | -1.59671000 | 1.73481500  | -1.40212000 |
| C    | -4.67228300 | -0.31284500 | -2.16460000 |
| C    | -4.97623900 | -2.98285400 | -0.64543100 |
| C    | -5.11121200 | -4.10944400 | 0.07384600  |
| C    | -0.99931300 | 2.34658200  | -2.54984100 |
| C    | -1.54210900 | 2.28550900  | -3.77576800 |
| O    | -3.21331900 | 2.21547400  | 1.53237500  |
| C    | -2.23289500 | 2.24396600  | 2.47820300  |
| C    | -2.37455000 | 3.45316500  | 3.36445900  |
| O    | -1.37482100 | 1.39181800  | 2.56549000  |
| H    | -5.16259600 | 0.51091500  | 1.16825400  |
| H    | -4.97970700 | -1.65537300 | 1.04365300  |
| H    | -2.89869600 | 0.20300800  | 1.21963200  |
| H    | -6.34940800 | 1.55195600  | -0.90702500 |
| H    | -6.91839500 | 3.51522800  | 0.44376900  |
| H    | -6.82778300 | 2.07306100  | 1.46186100  |
| H    | -5.50961000 | 3.25921800  | 1.48580300  |
| H    | -5.51985800 | 3.74401900  | -1.60434500 |
| H    | -4.34204000 | 2.52433700  | -2.08911300 |
| H    | -4.03376100 | 3.54808100  | -0.67385600 |
| H    | -3.70778000 | 0.10744200  | -2.47288500 |
| H    | -4.79451200 | -1.26638000 | -2.68098100 |
| H    | -5.44953900 | 0.36170600  | -2.54206600 |
| H    | -4.93336400 | -3.06218300 | -1.72926300 |
| H    | -5.18362300 | -5.08352100 | -0.39999200 |
| H    | -5.17047300 | -4.09041300 | 1.16002100  |
| H    | -0.07514500 | 2.88885400  | -2.37170400 |
| H    | -1.07172000 | 2.79407100  | -4.61134100 |
| H    | -2.45922400 | 1.74108300  | -3.97798800 |

|    |             |             |             |
|----|-------------|-------------|-------------|
| H  | -2.28249300 | 4.36652700  | 2.76715200  |
| H  | -1.60167900 | 3.43353200  | 4.13311500  |
| H  | -3.36500400 | 3.46675000  | 3.83043400  |
| H  | -2.30245300 | -4.93629500 | -1.55279700 |
| C  | -1.22294400 | -4.77207800 | -1.65035100 |
| C  | -0.83278500 | -3.54440700 | -0.80775200 |
| C  | -0.82762400 | -4.60675900 | -3.12297900 |
| H  | -0.73145200 | -5.66493300 | -1.23738000 |
| C  | 0.67761800  | -3.23450800 | -0.93498100 |
| H  | -1.11200400 | -3.72209700 | 0.23389300  |
| H  | -1.41127000 | -2.67203000 | -1.14273300 |
| C  | 0.66497600  | -4.27880700 | -3.25495000 |
| H  | -1.41860800 | -3.79392700 | -3.57027000 |
| H  | -1.06946900 | -5.51590700 | -3.68587500 |
| P  | 1.18221700  | -1.77069200 | 0.13450600  |
| C  | 1.05239600  | -3.04520600 | -2.42111800 |
| H  | 1.22866100  | -4.10003400 | -0.54261300 |
| H  | 0.92964900  | -4.10183100 | -4.30421800 |
| H  | 1.26080500  | -5.14209000 | -2.92483400 |
| Au | -0.25308700 | 0.01783700  | -0.34770100 |
| C  | 2.98964700  | -1.47882100 | -0.13844800 |
| C  | 1.04127000  | -2.26853100 | 1.94501600  |
| H  | 0.52230500  | -2.16587400 | -2.81197400 |
| H  | 2.12182500  | -2.84402600 | -2.53207100 |
| C  | 3.64277300  | -0.21583300 | -0.12733200 |
| C  | 3.76255600  | -2.64291200 | -0.33269700 |
| C  | 1.63933500  | -3.66683700 | 2.31028100  |
| C  | -0.38085900 | -2.07219900 | 2.52812100  |
| H  | 1.67656100  | -1.51224500 | 2.41389300  |
| C  | 3.01635700  | 1.15341700  | 0.02304200  |
| C  | 5.04019400  | -0.20625600 | -0.29587700 |
| C  | 5.14294900  | -2.59824700 | -0.50415100 |
| H  | 3.28111600  | -3.61351600 | -0.36218400 |
| C  | 0.56103000  | -4.67983400 | 2.72281000  |
| H  | 2.25155700  | -4.07854500 | 1.50281700  |
| H  | 2.33057200  | -3.52403600 | 3.15018300  |
| C  | -0.44227100 | -2.65942200 | 3.94739100  |
| H  | -1.13973600 | -2.55516900 | 1.90249100  |
| H  | -0.62530200 | -1.00538000 | 2.54703700  |
| C  | 2.74473400  | 1.92027500  | -1.15554400 |
| C  | 2.90063100  | 1.78260400  | 1.29359200  |
| C  | 5.78888000  | -1.36497200 | -0.48109800 |
| H  | 5.54628200  | 0.75361900  | -0.27045800 |
| H  | 5.70039800  | -3.51800400 | -0.65326100 |

|   |             |             |             |
|---|-------------|-------------|-------------|
| C | -0.24211600 | -4.19519100 | 3.94876500  |
| H | -0.11624500 | -4.85624500 | 1.87749300  |
| H | 1.03153100  | -5.64626500 | 2.93669300  |
| H | -1.39811700 | -2.39756300 | 4.41457900  |
| H | 0.33384100  | -2.17708600 | 4.55642200  |
| C | 2.28835500  | 3.23797000  | -1.01624400 |
| C | 3.02260500  | 1.52139000  | -2.62048700 |
| C | 2.44710000  | 3.11334700  | 1.34539100  |
| C | 3.25966400  | 1.24262200  | 2.69877200  |
| H | 6.86584600  | -1.30146200 | -0.60664300 |
| H | -1.21351500 | -4.70326400 | 3.96337900  |
| H | 0.27253300  | -4.49326300 | 4.86970800  |
| C | 2.12448800  | 3.86289500  | 0.22207100  |
| H | 2.11163100  | 3.81445300  | -1.92245400 |
| H | 2.40570100  | 2.21488500  | -3.20688000 |
| C | 4.48220600  | 1.82516200  | -3.02688200 |
| C | 2.61134500  | 0.12142000  | -3.09476400 |
| H | 2.37764800  | 3.59133600  | 2.32022600  |
| C | 4.19908800  | 0.03650200  | 2.85158000  |
| C | 1.98387100  | 1.05768500  | 3.55116100  |
| H | 3.80564600  | 2.07615900  | 3.16208400  |
| C | 1.67857100  | 5.31355700  | 0.34524300  |
| H | 4.59313900  | 1.73475700  | -4.11388400 |
| H | 4.77263700  | 2.84130900  | -2.74010400 |
| H | 5.18412000  | 1.12554900  | -2.56428600 |
| H | 2.65021900  | 0.08910700  | -4.19021500 |
| H | 1.58557600  | -0.11655600 | -2.79318800 |
| H | 3.27294000  | -0.66312800 | -2.72270600 |
| H | 4.42137500  | -0.09169900 | 3.91721300  |
| H | 5.14958100  | 0.18782300  | 2.33429400  |
| H | 3.77339300  | -0.90417100 | 2.49256100  |
| H | 1.41244400  | 1.98631800  | 3.63259900  |
| H | 1.30439200  | 0.31974500  | 3.11802100  |
| H | 2.24740700  | 0.73201200  | 4.56431700  |
| C | 2.71954100  | 6.27967700  | -0.25385000 |
| C | 0.28787700  | 5.55099600  | -0.27225200 |
| H | 1.60333000  | 5.53479800  | 1.41839900  |
| H | 3.70000800  | 6.14675700  | 0.21551500  |
| H | 2.83919800  | 6.11873400  | -1.33191400 |
| H | 2.40904300  | 7.32006700  | -0.10500300 |
| H | -0.03668900 | 6.58389800  | -0.10292900 |
| H | -0.46301100 | 4.88230400  | 0.16540700  |
| H | 0.29653200  | 5.38534200  | -1.35649600 |



|    |             |             |             |
|----|-------------|-------------|-------------|
| C  | -4.34360900 | -1.58098100 | 0.66826000  |
| C  | -4.70958800 | -0.85723800 | -0.64296500 |
| C  | -2.87019500 | -0.76599300 | -1.28985800 |
| C  | -5.13323300 | -1.69822600 | -1.68108100 |
| C  | -2.18893700 | -0.81901900 | -0.16485600 |
| C  | -2.95507000 | -1.07313600 | 1.11169800  |
| C  | -5.45877700 | -1.74872800 | 1.74665100  |
| C  | -4.94942400 | -2.68321400 | 2.86163700  |
| C  | -6.06765000 | -0.47910800 | 2.36707400  |
| C  | -5.17743100 | 0.59236200  | -0.61575800 |
| C  | -5.83135300 | -1.32053200 | -2.87514900 |
| C  | -6.14148600 | -2.23102000 | -3.82466400 |
| C  | -2.68976700 | -0.55832800 | -2.71115300 |
| C  | -1.74282300 | -1.15870400 | -3.44616700 |
| O  | -3.05860200 | 0.16901300  | 1.85151800  |
| C  | -2.20015000 | 0.34543300  | 2.89688700  |
| C  | -2.39611900 | 1.69639100  | 3.53526400  |
| O  | -1.38761700 | -0.48460600 | 3.23996500  |
| H  | -4.12019900 | -2.61288000 | 0.36331500  |
| H  | -4.88228300 | -2.75534300 | -1.59676500 |
| H  | -2.45151000 | -1.79520000 | 1.75568000  |
| H  | -6.27482200 | -2.27761700 | 1.23307500  |
| H  | -5.76938400 | -2.94420800 | 3.53875300  |
| H  | -4.54146100 | -3.61813600 | 2.45863100  |
| H  | -4.16733900 | -2.20562900 | 3.46321000  |
| H  | -6.83041600 | -0.77184200 | 3.09721600  |
| H  | -6.55858400 | 0.16101300  | 1.63021200  |
| H  | -5.31764600 | 0.11921600  | 2.88955300  |
| H  | -4.69160100 | 1.13587100  | 0.19377100  |
| H  | -4.94468200 | 1.10911800  | -1.55208400 |
| H  | -6.26204100 | 0.64943500  | -0.47010500 |
| H  | -6.14191200 | -0.28668600 | -2.99867900 |
| H  | -6.70051300 | -1.95947900 | -4.71484900 |
| H  | -5.85156900 | -3.27458800 | -3.72808600 |
| H  | -3.37565900 | 0.13806000  | -3.19178900 |
| H  | -1.62555500 | -0.92671700 | -4.50046000 |
| H  | -1.05466500 | -1.87741200 | -3.01204000 |
| H  | -1.90781700 | 2.45450900  | 2.91185400  |
| H  | -1.93577900 | 1.69883500  | 4.52423700  |
| H  | -3.45628500 | 1.95349200  | 3.60695700  |
| Au | -0.10191100 | -0.60787600 | -0.11959700 |
| H  | -1.02764900 | 6.72763000  | -0.10184300 |
| C  | -1.93138900 | 6.15886000  | -0.34489500 |
| C  | -1.97143600 | 4.82166300  | 0.42121400  |

|   |             |             |             |
|---|-------------|-------------|-------------|
| H | -1.94171700 | 5.99449200  | -1.42902100 |
| H | -2.80116700 | 6.77588400  | -0.09119900 |
| C | -0.73040500 | 3.98498800  | 0.13962900  |
| C | -3.27479100 | 4.05758300  | 0.12699700  |
| H | -1.96359800 | 5.05878900  | 1.49416400  |
| C | -0.47995000 | 3.43134600  | -1.11649500 |
| C | 0.24713200  | 3.80184100  | 1.11008200  |
| H | -4.14558900 | 4.66003600  | 0.41050400  |
| H | -3.31312100 | 3.11315300  | 0.68130900  |
| H | -3.36782900 | 3.82455400  | -0.94053200 |
| C | 0.69355600  | 2.73072900  | -1.42167000 |
| H | -1.19900400 | 3.59243300  | -1.91655000 |
| C | 1.43862300  | 3.08590100  | 0.89200200  |
| H | 0.10345100  | 4.27126800  | 2.08167800  |
| C | 0.83636600  | 2.41645500  | -2.92579300 |
| C | 1.65934800  | 2.51073800  | -0.39018900 |
| C | 2.35696300  | 3.09942700  | 2.13767800  |
| H | -0.19880100 | 2.38246100  | -3.28945200 |
| C | 1.51018800  | 3.58936500  | -3.67322100 |
| C | 1.45583800  | 1.08168100  | -3.35911100 |
| C | 2.98387400  | 1.87851100  | -0.75554600 |
| C | 3.85895000  | 2.80611500  | 2.00126500  |
| C | 1.73561800  | 2.25615800  | 3.27587000  |
| H | 2.31001300  | 4.14131800  | 2.48429600  |
| H | 1.44125100  | 3.43465600  | -4.75675000 |
| H | 1.02879900  | 4.54362700  | -3.43493700 |
| H | 2.57127500  | 3.67028900  | -3.41800400 |
| H | 1.24332800  | 0.92141300  | -4.42345600 |
| H | 1.02239000  | 0.24539900  | -2.80293700 |
| H | 2.54052700  | 1.05578700  | -3.23815700 |
| C | 3.94196900  | 2.77904900  | -1.25798700 |
| C | 3.34768700  | 0.50732300  | -0.66402400 |
| H | 4.33336000  | 2.98825300  | 2.97264400  |
| H | 4.34020500  | 3.46239400  | 1.27242700  |
| H | 4.08324000  | 1.77500300  | 1.71679100  |
| H | 0.74906900  | 2.63370100  | 3.56082400  |
| H | 1.60258000  | 1.21010200  | 2.98616600  |
| H | 2.37345800  | 2.28667600  | 4.16692600  |
| C | 5.21221900  | 2.38159600  | -1.66485100 |
| H | 3.66938100  | 3.82834300  | -1.31570500 |
| C | 4.63995900  | 0.12432200  | -1.07874700 |
| P | 2.26976700  | -0.85035500 | 0.00468100  |
| C | 5.56622000  | 1.03807900  | -1.57387800 |
| H | 5.91613500  | 3.11590800  | -2.04588700 |

|   |            |             |             |
|---|------------|-------------|-------------|
| H | 4.93804700 | -0.91619600 | -1.02617500 |
| C | 2.73104100 | -2.40920600 | -0.95106200 |
| C | 2.86583800 | -1.07348800 | 1.78087600  |
| H | 6.54995200 | 0.69816500  | -1.88383800 |
| C | 2.60490900 | -2.23527800 | -2.47946000 |
| C | 1.89734700 | -3.62915300 | -0.49413300 |
| H | 3.78162200 | -2.62274400 | -0.71356100 |
| C | 4.29571500 | -1.68114900 | 1.96111100  |
| C | 1.82055600 | -1.76711300 | 2.68877500  |
| H | 2.91479600 | -0.03222900 | 2.11150900  |
| C | 3.03883000 | -3.51005400 | -3.22349700 |
| H | 1.55724300 | -2.01232500 | -2.72383300 |
| H | 3.19628000 | -1.38284500 | -2.82601300 |
| C | 2.32603100 | -4.90629000 | -1.23937700 |
| H | 1.99434400 | -3.78927000 | 0.58319600  |
| H | 0.83414400 | -3.42827700 | -0.68764400 |
| C | 4.27043700 | -3.05866800 | 2.64179700  |
| H | 4.84060300 | -1.74509700 | 1.01476000  |
| H | 4.88051600 | -0.99168300 | 2.58296800  |
| C | 2.42488100 | -2.00614700 | 4.08131600  |
| H | 1.49484600 | -2.72439500 | 2.26621100  |
| H | 0.92233900 | -1.14711600 | 2.76385500  |
| C | 2.24193700 | -4.73714900 | -2.76174900 |
| H | 2.92158000 | -3.35885600 | -4.30350700 |
| H | 4.11065600 | -3.68336200 | -3.04876300 |
| H | 1.69993500 | -5.74461400 | -0.91027300 |
| H | 3.35797400 | -5.15986400 | -0.95650800 |
| C | 3.61094300 | -3.00175800 | 4.03601300  |
| H | 3.73093600 | -3.77010400 | 2.00339100  |
| H | 5.29342800 | -3.44435300 | 2.72238400  |
| H | 1.64693800 | -2.36590200 | 4.76351100  |
| H | 2.75899700 | -1.04076800 | 4.48506300  |
| H | 1.18845700 | -4.61808400 | -3.05646500 |
| H | 2.60619100 | -5.64041800 | -3.26536500 |
| H | 3.27217000 | -4.00746900 | 4.31161000  |
| H | 4.35758900 | -2.71473100 | 4.78611500  |

2d-2

|   |             |             |             |
|---|-------------|-------------|-------------|
| C | -4.36305800 | -1.42558900 | 0.74079000  |
| C | -4.56100800 | -0.84651600 | -0.70531700 |
| C | -2.98568700 | -0.87444100 | -1.21337700 |
| C | -5.09946900 | -1.85110000 | -1.58578100 |
| C | -2.18149900 | -0.85043600 | -0.12757700 |
| C | -2.95160700 | -0.96520500 | 1.16530500  |
| C | -5.55321500 | -1.36653500 | 1.74194700  |

|    |             |             |             |
|----|-------------|-------------|-------------|
| C  | -5.28198900 | -2.34530400 | 2.90214600  |
| C  | -5.96769800 | 0.00017300  | 2.31730900  |
| C  | -5.12976800 | 0.56814700  | -0.85307400 |
| C  | -5.89748900 | -1.65312900 | -2.74551200 |
| C  | -6.27739300 | -2.70687200 | -3.51331100 |
| C  | -2.69431200 | -0.78996100 | -2.64520300 |
| C  | -1.65024700 | -1.35528600 | -3.26493000 |
| O  | -2.98614500 | 0.33561600  | 1.80510600  |
| C  | -2.16967100 | 0.52197500  | 2.88103000  |
| C  | -2.29860400 | 1.92366600  | 3.41948100  |
| O  | -1.43833600 | -0.33753600 | 3.32151400  |
| H  | -4.20826300 | -2.50204600 | 0.58115300  |
| H  | -4.81033300 | -2.88125600 | -1.37828300 |
| H  | -2.49484500 | -1.66268800 | 1.87078200  |
| H  | -6.41880900 | -1.75880100 | 1.18691900  |
| H  | -6.15239700 | -2.39951300 | 3.56433400  |
| H  | -5.07295500 | -3.36014600 | 2.54306400  |
| H  | -4.42857400 | -2.02003200 | 3.50917100  |
| H  | -6.87832800 | -0.13052600 | 2.91278300  |
| H  | -6.18468300 | 0.74701800  | 1.55127100  |
| H  | -5.19895100 | 0.41038800  | 2.97580500  |
| H  | -4.63493000 | 1.24150200  | -0.15237200 |
| H  | -4.95924600 | 0.96051700  | -1.86121900 |
| H  | -6.20778400 | 0.58967400  | -0.66133400 |
| H  | -6.23295900 | -0.65121900 | -2.99685300 |
| H  | -6.92048100 | -2.57998200 | -4.37914100 |
| H  | -5.95802900 | -3.72070100 | -3.28393000 |
| H  | -3.40961100 | -0.22336200 | -3.24266900 |
| H  | -1.48838000 | -1.21576200 | -4.32952100 |
| H  | -0.92942300 | -1.96376500 | -2.72769900 |
| H  | -1.77023000 | 2.60977100  | 2.74781100  |
| H  | -1.84720500 | 1.97326600  | 4.41123100  |
| H  | -3.34540800 | 2.23716900  | 3.46060600  |
| Au | -0.12448700 | -0.61922900 | -0.10196800 |
| H  | -0.97981800 | 6.72266700  | -0.44323800 |
| C  | -1.88642600 | 6.14214000  | -0.64409900 |
| C  | -1.92085500 | 4.85258500  | 0.19972600  |
| H  | -1.90719800 | 5.91403000  | -1.71640800 |
| H  | -2.75316300 | 6.77434600  | -0.41898300 |
| C  | -0.68346200 | 3.99801400  | -0.04166600 |
| C  | -3.22701100 | 4.07341000  | -0.03960300 |
| H  | -1.90466900 | 5.15219200  | 1.25682900  |
| C  | -0.44181200 | 3.37611500  | -1.26709500 |
| C  | 0.29692700  | 3.86133200  | 0.93387700  |

|   |             |             |             |
|---|-------------|-------------|-------------|
| H | -4.09543100 | 4.69344600  | 0.21181200  |
| H | -3.26302800 | 3.16424600  | 0.57104000  |
| H | -3.32596500 | 3.77640300  | -1.09058700 |
| C | 0.72705500  | 2.65458100  | -1.53922500 |
| H | -1.16371700 | 3.49733200  | -2.07156200 |
| C | 1.48148200  | 3.12424800  | 0.75130100  |
| H | 0.16010800  | 4.38345900  | 1.87924000  |
| C | 0.86538500  | 2.26509300  | -3.02597800 |
| C | 1.69428500  | 2.48204800  | -0.50044700 |
| C | 2.40236100  | 3.19036500  | 1.99382600  |
| H | -0.17072500 | 2.20817000  | -3.38399000 |
| C | 1.53351400  | 3.40326600  | -3.83008000 |
| C | 1.49037900  | 0.91393800  | -3.39610500 |
| C | 3.01270200  | 1.82081200  | -0.83490900 |
| C | 3.89966000  | 2.86927300  | 1.87048600  |
| C | 1.77378500  | 2.41467100  | 3.17568700  |
| H | 2.36939600  | 4.24919700  | 2.28674100  |
| H | 1.46705800  | 3.19523900  | -4.90482300 |
| H | 1.04737300  | 4.36577700  | -3.63924200 |
| H | 2.59386900  | 3.50157800  | -3.57727200 |
| H | 1.27164900  | 0.69999200  | -4.44969600 |
| H | 1.06419200  | 0.10443000  | -2.79695900 |
| H | 2.57601600  | 0.89960000  | -3.28139100 |
| C | 3.97887600  | 2.68715700  | -1.38021400 |
| C | 3.36237400  | 0.45205800  | -0.67684400 |
| H | 4.37882500  | 3.09233000  | 2.83091700  |
| H | 4.38920900  | 3.48071000  | 1.10893600  |
| H | 4.10661300  | 1.82179700  | 1.63753900  |
| H | 0.79250900  | 2.81804900  | 3.44240500  |
| H | 1.62896600  | 1.35581000  | 2.94260600  |
| H | 2.41396300  | 2.48510800  | 4.06279800  |
| C | 5.24633400  | 2.25904900  | -1.76400100 |
| H | 3.71512800  | 3.73449200  | -1.49131900 |
| C | 4.65242300  | 0.03861000  | -1.06790400 |
| P | 2.26165900  | -0.86127300 | 0.04420500  |
| C | 5.58829500  | 0.91887400  | -1.60425900 |
| H | 5.95719000  | 2.96713000  | -2.18019700 |
| H | 4.94135200  | -1.00070100 | -0.96514100 |
| C | 2.72668900  | -2.46877500 | -0.82533300 |
| C | 2.84398600  | -1.00380000 | 1.83454100  |
| H | 6.56992900  | 0.55534500  | -1.89349900 |
| C | 2.64194400  | -2.37169600 | -2.36367900 |
| C | 1.86373700  | -3.65366900 | -0.33054100 |
| H | 3.76773300  | -2.68413900 | -0.55010600 |

|   |            |             |             |
|---|------------|-------------|-------------|
| C | 4.26615400 | -1.61420100 | 2.05622500  |
| C | 1.78521100 | -1.64469400 | 2.76584600  |
| H | 2.90070900 | 0.05182300  | 2.11404600  |
| C | 3.07654100 | -3.68828500 | -3.03063400 |
| H | 1.60494700 | -2.14826900 | -2.64888900 |
| H | 3.25417000 | -1.54622400 | -2.73795400 |
| C | 2.29177800 | -4.97251900 | -0.99908400 |
| H | 1.93063500 | -3.76045600 | 0.75562800  |
| H | 0.80864900 | -3.44757700 | -0.56010900 |
| C | 4.22087600 | -2.96967500 | 2.77837100  |
| H | 4.82595200 | -1.70881200 | 1.12110200  |
| H | 4.84503200 | -0.90984500 | 2.66696100  |
| C | 2.38177000 | -1.84116600 | 4.16829700  |
| H | 1.44407400 | -2.61233200 | 2.37991600  |
| H | 0.89661400 | -1.00806500 | 2.81362600  |
| C | 2.24933300 | -4.87951100 | -2.52967800 |
| H | 2.98968700 | -3.59030200 | -4.11964500 |
| H | 4.14082200 | -3.86741000 | -2.81886400 |
| H | 1.64501900 | -5.78462200 | -0.64487500 |
| H | 3.31226400 | -5.22546700 | -0.67667100 |
| C | 3.54644500 | -2.86246700 | 4.16277400  |
| H | 3.68154100 | -3.69546600 | 2.15626600  |
| H | 5.23909200 | -3.36233500 | 2.88253100  |
| H | 1.59602900 | -2.15803400 | 4.86269500  |
| H | 2.73623000 | -0.86822600 | 4.53474800  |
| H | 1.20573700 | -4.76008600 | -2.85753800 |
| H | 2.61241100 | -5.81207600 | -2.97783700 |
| H | 3.18218400 | -3.85299400 | 4.46027600  |
| H | 4.28992300 | -2.57185200 | 4.91465100  |

Ts<sub>2d</sub>-2

|   |             |             |             |
|---|-------------|-------------|-------------|
| C | -4.45183900 | -1.57855500 | 0.38978700  |
| C | -4.64086200 | -0.50227400 | -0.74416900 |
| C | -3.11973400 | -0.21092800 | -1.21546600 |
| C | -4.81956200 | -1.16951300 | -2.02046200 |
| C | -2.24908300 | -0.73524000 | -0.29699400 |
| C | -2.94595200 | -1.53468700 | 0.78124200  |
| C | -5.57469900 | -1.74028600 | 1.45689400  |
| C | -5.45264600 | -3.12876900 | 2.11627400  |
| C | -5.73802100 | -0.67413900 | 2.55526800  |
| C | -5.46218800 | 0.75384600  | -0.46626700 |
| C | -5.36432600 | -0.63243000 | -3.23051500 |
| C | -5.42936700 | -1.38909500 | -4.34929200 |
| C | -2.81260000 | 0.70913900  | -2.32288700 |
| C | -1.81344100 | 0.55950900  | -3.19844700 |

|   |             |             |             |
|---|-------------|-------------|-------------|
| O | -2.60412000 | -1.09508400 | 2.12457200  |
| C | -2.69874400 | 0.21595200  | 2.45298600  |
| C | -2.19168800 | 0.45875200  | 3.85263500  |
| O | -3.13220200 | 1.06791900  | 1.70792600  |
| H | -4.51143900 | -2.53628100 | -0.14095300 |
| H | -4.46931800 | -2.19732900 | -2.08879900 |
| H | -2.54960400 | -2.55368200 | 0.80495600  |
| H | -6.50788300 | -1.74585400 | 0.87413900  |
| H | -6.29016000 | -3.30032900 | 2.80062000  |
| H | -5.45880000 | -3.93760000 | 1.37559600  |
| H | -4.52824400 | -3.20769200 | 2.70035900  |
| H | -6.69781300 | -0.83474200 | 3.05889100  |
| H | -5.72713300 | 0.34991900  | 2.18108200  |
| H | -4.96076200 | -0.76721100 | 3.31909000  |
| H | -5.00943800 | 1.31481200  | 0.35007800  |
| H | -5.51091600 | 1.41254000  | -1.33788700 |
| H | -6.48938200 | 0.48698400  | -0.19667600 |
| H | -5.77510200 | 0.37198400  | -3.23312600 |
| H | -5.89646100 | -1.02285000 | -5.25849300 |
| H | -5.02663300 | -2.39875200 | -4.37852400 |
| H | -3.47005500 | 1.57317900  | -2.41782500 |
| H | -1.62730300 | 1.30059300  | -3.96964600 |
| H | -1.14642700 | -0.29710800 | -3.16582500 |
| H | -2.54259600 | -0.31668100 | 4.53895300  |
| H | -2.51868000 | 1.44321400  | 4.18983200  |
| H | -1.09645400 | 0.42843100  | 3.84905200  |
| H | 6.33237500  | 2.80452400  | -1.34319000 |
| C | 5.53423400  | 2.10672100  | -1.10661600 |
| C | 4.28714900  | 2.58166500  | -0.71129300 |
| C | 5.74263200  | 0.73272200  | -1.19503000 |
| C | 3.21238100  | 1.73053600  | -0.39205000 |
| H | 4.12488000  | 3.65246000  | -0.63583700 |
| C | 4.69892000  | -0.13406600 | -0.88282500 |
| H | 6.70397200  | 0.33338700  | -1.50450100 |
| C | 1.92842800  | 2.43890200  | -0.02506500 |
| C | 3.42959300  | 0.32868000  | -0.47898600 |
| H | 4.88563100  | -1.19819800 | -0.96905800 |
| C | 1.06433800  | 2.87400400  | -1.07720900 |
| C | 1.66321000  | 2.87149200  | 1.30417000  |
| P | 2.17314700  | -0.97194500 | -0.05616300 |
| C | -0.06693500 | 3.63461700  | -0.75764400 |
| C | 1.29984000  | 2.74827800  | -2.59681600 |
| C | 0.52473300  | 3.66361300  | 1.53740300  |
| C | 2.49259500  | 2.65826500  | 2.59387900  |

|    |             |             |             |
|----|-------------|-------------|-------------|
| Au | -0.19492300 | -0.55440700 | -0.20835800 |
| C  | 2.55180500  | -2.44796500 | -1.16855600 |
| C  | 2.63713500  | -1.46440900 | 1.70784600  |
| C  | -0.36080400 | 4.05344500  | 0.54026600  |
| H  | -0.71210100 | 3.95458900  | -1.57246500 |
| H  | 0.29747800  | 2.86024400  | -3.02927300 |
| C  | 2.12466700  | 3.94236800  | -3.12800400 |
| C  | 1.84241000  | 1.43228100  | -3.16996200 |
| H  | 0.34635700  | 4.01929600  | 2.55033500  |
| C  | 3.96835200  | 2.23860700  | 2.51137900  |
| C  | 1.72757500  | 1.75891600  | 3.59244200  |
| H  | 2.51317900  | 3.65445500  | 3.05723500  |
| C  | 2.52300300  | -2.08405400 | -2.66931200 |
| C  | 1.59185700  | -3.63205700 | -0.90343200 |
| H  | 3.56532100  | -2.78558200 | -0.91346600 |
| C  | 3.99655300  | -2.21368300 | 1.88927900  |
| C  | 1.48498300  | -2.16624800 | 2.46907200  |
| H  | 2.75095900  | -0.47816200 | 2.16573500  |
| C  | -1.53811700 | 4.96978300  | 0.84588800  |
| H  | 2.13074800  | 3.93861000  | -4.22480500 |
| H  | 1.70520900  | 4.89688700  | -2.79349300 |
| H  | 3.16486200  | 3.89075000  | -2.79170100 |
| H  | 1.68029600  | 1.42273800  | -4.25509600 |
| H  | 1.32120300  | 0.56869800  | -2.74738700 |
| H  | 2.91417400  | 1.30542600  | -3.00320000 |
| H  | 4.38851800  | 2.25519400  | 3.52395400  |
| H  | 4.55589200  | 2.92786700  | 1.90055400  |
| H  | 4.11935000  | 1.23267800  | 2.11096400  |
| H  | 0.74245900  | 2.17373800  | 3.82636700  |
| H  | 1.56977300  | 0.75192700  | 3.19325500  |
| H  | 2.28535200  | 1.66782600  | 4.53189300  |
| C  | 2.88400900  | -3.29579000 | -3.54576700 |
| H  | 1.51259700  | -1.73885100 | -2.92980300 |
| H  | 3.20353100  | -1.25508000 | -2.88418100 |
| C  | 1.94821900  | -4.84548600 | -1.78101800 |
| H  | 1.61668000  | -3.92996600 | 0.14827700  |
| H  | 0.56182900  | -3.31301400 | -1.11618500 |
| C  | 3.81537100  | -3.66459600 | 2.36101900  |
| H  | 4.60056100  | -2.19034100 | 0.97791200  |
| H  | 4.58623800  | -1.67080700 | 2.63875800  |
| C  | 1.98257900  | -2.64563200 | 3.84166800  |
| H  | 1.09266200  | -3.01982100 | 1.90533100  |
| H  | 0.64571300  | -1.47057200 | 2.58270000  |
| C  | -1.32546800 | 6.36925000  | 0.23502700  |



|   |             |             |             |
|---|-------------|-------------|-------------|
| C | -2.88395800 | 4.36868600  | 0.40220600  |
| H | -1.57665300 | 5.08984100  | 1.93722200  |
| C | 1.95955100  | -4.48940400 | -3.27300600 |
| H | 2.83691600  | -3.00666700 | -4.60268800 |
| H | 3.92603100  | -3.58740300 | -3.34950600 |
| H | 1.23598000  | -5.65636300 | -1.58440200 |
| H | 2.93807100  | -5.22414600 | -1.48773700 |
| C | 3.06607100  | -3.74437500 | 3.70890500  |
| H | 3.26765200  | -4.23021800 | 1.59653800  |
| H | 4.79607900  | -4.14679600 | 2.44509900  |
| H | 1.13896100  | -3.01207600 | 4.43759300  |
| H | 2.38782000  | -1.78188500 | 4.38585400  |
| H | -0.38753800 | 6.81677300  | 0.58135300  |
| H | -1.28961100 | 6.32236500  | -0.86005900 |
| H | -2.14659200 | 7.03984200  | 0.51379900  |
| H | -3.70764400 | 5.03818900  | 0.67764900  |
| H | -3.05373900 | 3.39569900  | 0.87250700  |
| H | -2.91912300 | 4.23550700  | -0.68653700 |
| H | 0.93780400  | -4.23695000 | -3.59385900 |
| H | 2.26901100  | -5.35647400 | -3.86854100 |
| H | 2.61084500  | -4.73694000 | 3.80734000  |
| H | 3.77995300  | -3.65220800 | 4.53595200  |

3d-2

|   |             |             |             |
|---|-------------|-------------|-------------|
| C | -4.32007500 | -1.91934300 | 0.71401100  |
| C | -4.23590700 | -1.76640000 | -0.82404600 |
| C | -3.02987200 | -0.89887600 | -1.20255700 |
| C | -2.97035100 | -2.41681500 | -1.39370600 |
| C | -2.29520400 | -0.49852900 | 0.06055100  |
| C | -3.00650100 | -1.24285700 | 1.22929600  |
| C | -5.67776400 | -1.51870100 | 1.36527800  |
| C | -5.77180900 | -1.99274100 | 2.82627300  |
| C | -6.10689200 | -0.04221000 | 1.23830700  |
| C | -5.50587700 | -1.80867600 | -1.65293000 |
| C | -2.93337600 | -3.07831600 | -2.72019300 |
| C | -2.28507500 | -4.22515800 | -2.94925700 |
| C | -3.03655900 | 0.06813800  | -2.34100200 |
| C | -2.27617800 | -0.01141500 | -3.43528900 |
| O | -3.23896500 | -0.15478500 | 2.22102800  |
| C | -3.11728600 | 0.98675300  | 1.62237800  |
| C | -3.36647500 | 2.25255400  | 2.35501100  |
| O | -2.73833600 | 0.96230900  | 0.41335300  |
| H | -4.21443300 | -2.98721100 | 0.94828700  |
| H | -2.35551800 | -2.94587800 | -0.66263400 |
| H | -2.36114300 | -1.93448400 | 1.76420300  |

|    |             |             |             |
|----|-------------|-------------|-------------|
| H  | -6.41220200 | -2.10807500 | 0.80248100  |
| H  | -6.77761100 | -1.81027100 | 3.22046400  |
| H  | -5.57446000 | -3.06757800 | 2.91146100  |
| H  | -5.06346200 | -1.46494300 | 3.47435700  |
| H  | -7.19814100 | 0.03416700  | 1.28992400  |
| H  | -5.79497800 | 0.41086700  | 0.29087600  |
| H  | -5.71830400 | 0.56698000  | 2.06082600  |
| H  | -6.24326100 | -1.07264100 | -1.32030100 |
| H  | -5.29534500 | -1.59700700 | -2.70418200 |
| H  | -5.97346100 | -2.79943300 | -1.60335800 |
| H  | -3.47501300 | -2.60685700 | -3.53509200 |
| H  | -2.29316500 | -4.69549200 | -3.92780700 |
| H  | -1.73354900 | -4.74138700 | -2.16586200 |
| H  | -3.71290900 | 0.91571300  | -2.22741700 |
| H  | -2.33161400 | 0.74485100  | -4.21353100 |
| H  | -1.58327100 | -0.83197300 | -3.59756200 |
| H  | -4.12711100 | 2.83685500  | 1.82807100  |
| H  | -2.44103000 | 2.83908500  | 2.35486400  |
| H  | -3.68933700 | 2.04676600  | 3.37566100  |
| Au | -0.18476600 | -0.51900600 | 0.07407500  |
| H  | -0.64300500 | 6.93178600  | 0.28096000  |
| C  | -1.49035600 | 6.58582900  | -0.32015000 |
| C  | -1.91133200 | 5.15529000  | 0.07800600  |
| H  | -1.19136700 | 6.62332000  | -1.37425400 |
| H  | -2.31985700 | 7.28829800  | -0.17838100 |
| C  | -0.73319400 | 4.19674100  | -0.04910800 |
| C  | -3.15229300 | 4.71753000  | -0.71912200 |
| H  | -2.18989500 | 5.18631900  | 1.14181400  |
| C  | -0.36169600 | 3.62569300  | -1.26480800 |
| C  | 0.08729500  | 3.92781100  | 1.04237700  |
| H  | -4.00184600 | 5.37048800  | -0.48934300 |
| H  | -3.43790600 | 3.68350400  | -0.49308900 |
| H  | -2.98096700 | 4.78121900  | -1.79952700 |
| C  | 0.78842600  | 2.84051900  | -1.42390400 |
| H  | -0.96003600 | 3.82976100  | -2.14855400 |
| C  | 1.24618500  | 3.13456000  | 0.96808900  |
| H  | -0.15055300 | 4.39491300  | 1.99793900  |
| C  | 1.07463600  | 2.48560100  | -2.89717100 |
| C  | 1.60285500  | 2.55760100  | -0.28374800 |
| C  | 1.97516500  | 3.03895200  | 2.32634700  |
| H  | 0.09015500  | 2.54296500  | -3.37830400 |
| C  | 1.94236000  | 3.56346500  | -3.58434800 |
| C  | 1.59650400  | 1.08159600  | -3.22151100 |
| C  | 2.95105400  | 1.89481900  | -0.49301400 |

|   |            |             |             |
|---|------------|-------------|-------------|
| C | 3.49006100 | 2.78466900  | 2.37244400  |
| C | 1.21464900 | 2.07319100  | 3.26354100  |
| H | 1.85169100 | 4.03718000  | 2.76724000  |
| H | 1.96422500 | 3.39105400  | -4.66694800 |
| H | 1.54318100 | 4.56833000  | -3.40953900 |
| H | 2.97521300 | 3.53915600  | -3.22475700 |
| H | 1.50240000 | 0.90440100  | -4.29980000 |
| H | 1.00884100 | 0.31559100  | -2.70574800 |
| H | 2.64833900 | 0.95062400  | -2.96094200 |
| C | 3.96374400 | 2.79312500  | -0.88205300 |
| C | 3.30236900 | 0.52109500  | -0.37022700 |
| H | 3.82854800 | 2.90210100  | 3.40856100  |
| H | 4.04018700 | 3.50553000  | 1.76191400  |
| H | 3.78012100 | 1.78481000  | 2.04259600  |
| H | 0.19486300 | 2.42842200  | 3.44946700  |
| H | 1.13302300 | 1.07274000  | 2.82861600  |
| H | 1.72001800 | 1.98949600  | 4.23299500  |
| C | 5.26734100 | 2.39346600  | -1.16117800 |
| H | 3.70488700 | 3.84446500  | -0.95893900 |
| C | 4.62575100 | 0.13490500  | -0.66759400 |
| P | 2.18183300 | -0.84311000 | 0.20330200  |
| C | 5.60205100 | 1.04617600  | -1.05928300 |
| H | 6.00952900 | 3.12890800  | -1.45796700 |
| H | 4.90731900 | -0.90970400 | -0.60448900 |
| C | 2.64929400 | -2.38418400 | -0.77854200 |
| C | 2.72153800 | -1.14505800 | 1.99363500  |
| H | 6.60796800 | 0.70209800  | -1.28060300 |
| C | 2.60369700 | -2.16698100 | -2.30597500 |
| C | 1.75627800 | -3.58782600 | -0.39456800 |
| H | 3.68091700 | -2.63597400 | -0.49922400 |
| C | 4.11270500 | -1.82863800 | 2.20933200  |
| C | 1.61663600 | -1.81570100 | 2.84767500  |
| H | 2.80933400 | -0.11879300 | 2.36243200  |
| C | 3.02904200 | -3.43789100 | -3.06177900 |
| H | 1.57952600 | -1.89945900 | -2.59780400 |
| H | 3.24522800 | -1.33064000 | -2.59814100 |
| C | 2.17635000 | -4.85911100 | -1.15447600 |
| H | 1.79694900 | -3.78028900 | 0.68161600  |
| H | 0.71138500 | -3.34649000 | -0.63456800 |
| C | 3.99941600 | -3.21086900 | 2.87125500  |
| H | 4.67989800 | -1.91448200 | 1.27866200  |
| H | 4.71534700 | -1.17731500 | 2.85459500  |
| C | 2.14834800 | -2.10307200 | 4.26058600  |
| H | 1.26730100 | -2.74771800 | 2.38970800  |

|   |            |             |             |
|---|------------|-------------|-------------|
| H | 0.74334700 | -1.15467100 | 2.89342400  |
| C | 2.16589600 | -4.64511700 | -2.67345900 |
| H | 2.96956500 | -3.25409400 | -4.14123500 |
| H | 4.08417300 | -3.65563800 | -2.84041100 |
| H | 1.50829200 | -5.68378500 | -0.87678700 |
| H | 3.18530500 | -5.15562500 | -0.83290800 |
| C | 3.30160600 | -3.13873000 | 4.24469700  |
| H | 3.44744500 | -3.88885400 | 2.20777200  |
| H | 4.99970200 | -3.64575200 | 2.97905300  |
| H | 1.33103900 | -2.45086500 | 4.90258500  |
| H | 2.49709400 | -1.15765500 | 4.69773400  |
| H | 1.13247300 | -4.47541600 | -3.00973400 |
| H | 2.51899400 | -5.54761000 | -3.18625800 |
| H | 2.92133400 | -4.13320500 | 4.50573900  |
| H | 4.03397600 | -2.87879400 | 5.01805100  |

Ts<sub>3d</sub>-2

|   |             |             |             |
|---|-------------|-------------|-------------|
| C | -4.38917000 | -1.86166600 | 0.68201800  |
| C | -4.28890500 | -1.70929300 | -0.85757500 |
| C | -3.01556800 | -0.92801400 | -1.20478200 |
| C | -3.10002100 | -2.48315800 | -1.40114900 |
| C | -2.24552000 | -0.67505900 | 0.02308600  |
| C | -3.01004400 | -1.31637400 | 1.19792800  |
| C | -5.71223100 | -1.36283700 | 1.33049100  |
| C | -5.84815100 | -1.85035600 | 2.78415400  |
| C | -6.02896000 | 0.14170200  | 1.22562100  |
| C | -3.05779000 | -3.09866100 | -2.74615400 |
| C | -2.44467300 | -4.26204800 | -2.99216400 |
| C | -2.89168900 | 0.01904500  | -2.35284700 |
| C | -2.11433300 | -0.13750400 | -3.42596900 |
| O | -3.09294900 | -0.31592900 | 2.26719800  |
| C | -3.00781700 | 0.91544500  | 1.80163100  |
| C | -3.13427900 | 2.01093700  | 2.81189000  |
| O | -2.81149700 | 1.09950400  | 0.59159600  |
| H | -4.37804100 | -2.93798500 | 0.89957800  |
| H | -2.55150000 | -3.07490000 | -0.66725600 |
| H | -2.41610600 | -2.10820200 | 1.65474100  |
| H | -6.48780600 | -1.88691500 | 0.75735700  |
| H | -6.83574200 | -1.58927600 | 3.18009100  |
| H | -5.74259800 | -2.93930800 | 2.85341100  |
| H | -5.09697000 | -1.39447400 | 3.43785800  |
| H | -7.11074900 | 0.29744600  | 1.29615600  |
| H | -5.69180200 | 0.58917000  | 0.28551800  |
| H | -5.58508300 | 0.70692900  | 2.05039400  |
| H | -3.56949400 | -2.58635300 | -3.55480600 |

|    |             |             |             |
|----|-------------|-------------|-------------|
| H  | -2.45679600 | -4.70993900 | -3.98106100 |
| H  | -1.92275000 | -4.81488700 | -2.21375900 |
| H  | -3.48297600 | 0.92858100  | -2.24928900 |
| H  | -2.07443100 | 0.62175200  | -4.20195500 |
| H  | -1.49924100 | -1.02041900 | -3.57297100 |
| H  | -2.83508100 | 2.95870700  | 2.36562200  |
| H  | -2.50716100 | 1.78144300  | 3.67839800  |
| H  | -4.17030700 | 2.07738600  | 3.15987200  |
| Au | -0.17879200 | -0.52676400 | 0.07228100  |
| H  | -0.79460800 | 6.88307000  | 0.06569200  |
| C  | -1.65348300 | 6.47113800  | -0.47471800 |
| C  | -1.99694800 | 5.04980100  | 0.01835400  |
| H  | -1.40522500 | 6.46261800  | -1.54266800 |
| H  | -2.50407100 | 7.14762500  | -0.33143400 |
| C  | -0.78602600 | 4.13329600  | -0.10657700 |
| C  | -3.25007200 | 4.51444600  | -0.69601100 |
| H  | -2.23223400 | 5.12773700  | 1.09034200  |
| C  | -0.40477500 | 3.55976300  | -1.31826700 |
| C  | 0.05124700  | 3.90682200  | 0.98047900  |
| H  | -4.11059200 | 5.15961100  | -0.48554600 |
| H  | -3.49173300 | 3.49608000  | -0.37395500 |
| H  | -3.11726500 | 4.49931100  | -1.78401400 |
| C  | 0.76652300  | 2.80671100  | -1.47541700 |
| H  | -1.01429500 | 3.73748100  | -2.20034900 |
| C  | 1.23060800  | 3.14508900  | 0.90997900  |
| H  | -0.19653600 | 4.37646700  | 1.93164000  |
| C  | 1.06017800  | 2.44898800  | -2.94656800 |
| C  | 1.59247400  | 2.55765400  | -0.33525200 |
| C  | 1.97318700  | 3.09489300  | 2.26369200  |
| H  | 0.07377000  | 2.47618600  | -3.42654600 |
| C  | 1.89651400  | 3.54547800  | -3.64306600 |
| C  | 1.62006000  | 1.05769800  | -3.26266900 |
| C  | 2.94744500  | 1.91045700  | -0.54010000 |
| C  | 3.49119600  | 2.85931200  | 2.30428900  |
| C  | 1.23296600  | 2.14721900  | 3.23481100  |
| H  | 1.84093900  | 4.10352500  | 2.67769000  |
| H  | 1.92086700  | 3.36703900  | -4.72471800 |
| H  | 1.47031800  | 4.53995000  | -3.47327500 |
| H  | 2.93058500  | 3.55191200  | -3.28607500 |
| H  | 1.52912500  | 0.87008000  | -4.33956200 |
| H  | 1.05389200  | 0.28025100  | -2.74038300 |
| H  | 2.67562900  | 0.95604500  | -3.00330700 |
| C  | 3.95218200  | 2.80881600  | -0.94838800 |
| C  | 3.30895200  | 0.54189400  | -0.39527300 |

|   |            |             |             |
|---|------------|-------------|-------------|
| H | 3.83601300 | 3.00366600  | 3.33493600  |
| H | 4.02868800 | 3.57257500  | 1.67395100  |
| H | 3.79078100 | 1.85561400  | 1.99445000  |
| H | 0.20830000 | 2.49132000  | 3.41248900  |
| H | 1.16662300 | 1.13215700  | 2.83222400  |
| H | 1.74425600 | 2.10245100  | 4.20377800  |
| C | 5.25696800 | 2.41237700  | -1.22651900 |
| H | 3.68584800 | 3.85696900  | -1.04115600 |
| C | 4.63316600 | 0.15784600  | -0.69152200 |
| P | 2.19666500 | -0.81466900 | 0.20780700  |
| C | 5.60119100 | 1.06902400  | -1.10332300 |
| H | 5.99332700 | 3.14716800  | -1.53903700 |
| H | 4.92221800 | -0.88363500 | -0.61185300 |
| C | 2.66522100 | -2.37182700 | -0.74850100 |
| C | 2.73858400 | -1.08468000 | 2.00181600  |
| H | 6.60843700 | 0.72809700  | -1.32342800 |
| C | 2.61126700 | -2.18181200 | -2.27902000 |
| C | 1.78434600 | -3.57595200 | -0.33932300 |
| H | 3.69992700 | -2.61060000 | -0.46935600 |
| C | 4.13357300 | -1.75779000 | 2.22532500  |
| C | 1.63788000 | -1.74647200 | 2.86808100  |
| H | 2.82226000 | -0.05196900 | 2.35305600  |
| C | 3.04420300 | -3.46202900 | -3.01454900 |
| H | 1.58335100 | -1.92840100 | -2.57091900 |
| H | 3.24369600 | -1.34484800 | -2.58838800 |
| C | 2.21256800 | -4.85675100 | -1.07861700 |
| H | 1.83099200 | -3.74872100 | 0.73988000  |
| H | 0.73613200 | -3.34805700 | -0.57897300 |
| C | 4.02878100 | -3.12825100 | 2.91259600  |
| H | 4.69857000 | -1.85778900 | 1.29466300  |
| H | 4.73481900 | -1.09194000 | 2.85679200  |
| C | 2.17308600 | -2.00629000 | 4.28511000  |
| H | 1.29330300 | -2.68840700 | 2.42686900  |
| H | 0.76048700 | -1.09013000 | 2.90365200  |
| C | 2.19374300 | -4.66994800 | -2.60106400 |
| H | 2.97851800 | -3.29775200 | -4.09677200 |
| H | 4.10209600 | -3.66682900 | -2.79428300 |
| H | 1.55365600 | -5.68256500 | -0.78307700 |
| H | 3.22563600 | -5.13810800 | -0.75659600 |
| C | 3.33254900 | -3.03519600 | 4.28552600  |
| H | 3.47978500 | -3.82146000 | 2.26247200  |
| H | 5.03166400 | -3.55542900 | 3.02674200  |
| H | 1.35854300 | -2.34777000 | 4.93388500  |
| H | 2.51667200 | -1.05136200 | 4.70521000  |

|      |             |             |             |
|------|-------------|-------------|-------------|
| H    | 1.15719400  | -4.51575500 | -2.93593200 |
| H    | 2.55250300  | -5.57820500 | -3.09947800 |
| H    | 2.95865200  | -4.02703000 | 4.56511200  |
| H    | 4.06453100  | -2.75707500 | 5.05286100  |
| C    | -5.54756700 | -1.61978400 | -1.69880500 |
| H    | -5.30832300 | -1.42374500 | -2.74710800 |
| H    | -6.11083500 | -2.55941000 | -1.65745700 |
| H    | -6.20791000 | -0.81554900 | -1.36444100 |
| 4d-2 |             |             |             |
| C    | -4.31993500 | -1.91980400 | 0.71355300  |
| C    | -4.23590900 | -1.76608500 | -0.82443800 |
| C    | -3.02990700 | -0.89832000 | -1.20261000 |
| C    | -2.97041300 | -2.41617500 | -1.39455500 |
| C    | -2.29513000 | -0.49864900 | 0.06066100  |
| C    | -3.00631100 | -1.24360500 | 1.22907500  |
| C    | -5.67756600 | -1.51945700 | 1.36513900  |
| C    | -5.77154300 | -1.99430800 | 2.82587600  |
| C    | -6.10665100 | -0.04287500 | 1.23902100  |
| C    | -2.93346600 | -3.07699700 | -2.72138900 |
| C    | -2.28487000 | -4.22353500 | -2.95114800 |
| C    | -3.03666600 | 0.06934300  | -2.34049300 |
| C    | -2.27671800 | -0.00983300 | -3.43511200 |
| O    | -3.23871100 | -0.15605400 | 2.22142600  |
| C    | -3.11703400 | 0.98580400  | 1.62339300  |
| C    | -3.36618500 | 2.25126700  | 2.35668200  |
| O    | -2.73817800 | 0.96200300  | 0.41431300  |
| H    | -4.21431500 | -2.98780200 | 0.94727100  |
| H    | -2.35549700 | -2.94561300 | -0.66382100 |
| H    | -2.36090800 | -1.93551700 | 1.76354800  |
| H    | -6.41207300 | -2.10848000 | 0.80206600  |
| H    | -6.77731800 | -1.81202600 | 3.22022600  |
| H    | -5.57422700 | -3.06920000 | 2.91046500  |
| H    | -5.06315200 | -1.46689000 | 3.47422200  |
| H    | -7.19790100 | 0.03351600  | 1.29060200  |
| H    | -5.79466800 | 0.41077300  | 0.29188200  |
| H    | -5.71809700 | 0.56581200  | 2.06193300  |
| H    | -3.47537100 | -2.60528200 | -3.53596100 |
| H    | -2.29298500 | -4.69337100 | -3.92993500 |
| H    | -1.73306800 | -4.74000600 | -2.16810700 |
| H    | -3.71261800 | 0.91713000  | -2.22613400 |
| H    | -2.33218100 | 0.74691800  | -4.21287900 |
| H    | -1.58416100 | -0.83053600 | -3.59813900 |
| H    | -4.12773400 | 2.83526300  | 1.83070800  |
| H    | -2.44109000 | 2.83833100  | 2.35574600  |

|    |             |             |             |
|----|-------------|-------------|-------------|
| H  | -3.68793300 | 2.04497600  | 3.37758200  |
| Au | -0.18471600 | -0.51900900 | 0.07395000  |
| H  | -0.64386900 | 6.93171100  | 0.27944200  |
| C  | -1.49149300 | 6.58513600  | -0.32092900 |
| C  | -1.91184900 | 5.15475700  | 0.07841600  |
| H  | -1.19315100 | 6.62204200  | -1.37524000 |
| H  | -2.32108400 | 7.28749300  | -0.17911800 |
| C  | -0.73356300 | 4.19640600  | -0.04875700 |
| C  | -3.15315400 | 4.71611800  | -0.71771500 |
| H  | -2.18981200 | 5.18639700  | 1.14236300  |
| C  | -0.36196000 | 3.62558000  | -1.26454700 |
| C  | 0.08694600  | 3.92742500  | 1.04269400  |
| H  | -4.00270300 | 5.36912800  | -0.48806000 |
| H  | -3.43847400 | 3.68224000  | -0.49065800 |
| H  | -2.98237200 | 4.77890700  | -1.79825900 |
| C  | 0.78823500  | 2.84055000  | -1.42372700 |
| H  | -0.96030800 | 3.82972000  | -2.14827700 |
| C  | 1.24597600  | 3.13436300  | 0.96830400  |
| H  | -0.15096100 | 4.39438600  | 1.99831300  |
| C  | 1.07446700  | 2.48577700  | -2.89702900 |
| C  | 1.60271200  | 2.55760200  | -0.28358900 |
| C  | 1.97508300  | 3.03887800  | 2.32651400  |
| H  | 0.08993900  | 2.54287900  | -3.37810300 |
| C  | 1.94184400  | 3.56396600  | -3.58415000 |
| C  | 1.59672200  | 1.08196100  | -3.22152100 |
| C  | 2.95096100  | 1.89496800  | -0.49297400 |
| C  | 3.49000000  | 2.78471700  | 2.37246700  |
| C  | 1.21477300  | 2.07311200  | 3.26386300  |
| H  | 1.85157000  | 4.03713100  | 2.76734200  |
| H  | 1.96379600  | 3.39162900  | -4.66676100 |
| H  | 1.54234900  | 4.56869500  | -3.40928800 |
| H  | 2.97470100  | 3.53996500  | -3.22454000 |
| H  | 1.50261500  | 0.90485700  | -4.29982600 |
| H  | 1.00927500  | 0.31574800  | -2.70582100 |
| H  | 2.64860200  | 0.95120700  | -2.96100600 |
| C  | 3.96356000  | 2.79338500  | -0.88200800 |
| C  | 3.30239100  | 0.52125100  | -0.37027300 |
| H  | 3.82859200  | 2.90224500  | 3.40854100  |
| H  | 4.04002600  | 3.50556300  | 1.76182900  |
| H  | 3.78010600  | 1.78485100  | 2.04266900  |
| H  | 0.19494300  | 2.42819200  | 3.44984600  |
| H  | 1.13326900  | 1.07259400  | 2.82906400  |
| H  | 1.72022500  | 1.98959300  | 4.23329000  |
| C  | 5.26717800  | 2.39385200  | -1.16121800 |



|   |             |             |             |
|---|-------------|-------------|-------------|
| H | 3.70461700  | 3.84470800  | -0.95880600 |
| C | 4.62581200  | 0.13521200  | -0.66769500 |
| P | 2.18195200  | -0.84301800 | 0.20317600  |
| C | 5.60201600  | 1.04658000  | -1.05939300 |
| H | 6.00928500  | 3.12936900  | -1.45802000 |
| H | 4.90748900  | -0.90937400 | -0.60461400 |
| C | 2.64950500  | -2.38406300 | -0.77873200 |
| C | 2.72163200  | -1.14499100 | 1.99352500  |
| H | 6.60795600  | 0.70260600  | -1.28075700 |
| C | 2.60371800  | -2.16680700 | -2.30612400 |
| C | 1.75675100  | -3.58782100 | -0.39465500 |
| H | 3.68120600  | -2.63567800 | -0.49950600 |
| C | 4.11286700  | -1.82833700 | 2.20921800  |
| C | 1.61679800  | -1.81576900 | 2.84753100  |
| H | 2.80922700  | -0.11869800 | 2.36231500  |
| C | 3.02914900  | -3.43763300 | -3.06205800 |
| H | 1.57947600  | -1.89942900 | -2.59785600 |
| H | 3.24510400  | -1.33036900 | -2.59833600 |
| C | 2.17685900  | -4.85903200 | -1.15470900 |
| H | 1.79768200  | -3.78036800 | 0.68150600  |
| H | 0.71176200  | -3.34665300 | -0.63442000 |
| C | 3.99980700  | -3.21055200 | 2.87125600  |
| H | 4.68004000  | -1.91426800 | 1.27853000  |
| H | 4.71550600  | -1.17688800 | 2.85435900  |
| C | 2.14852500  | -2.10300800 | 4.26048100  |
| H | 1.26759500  | -2.74785400 | 2.38959500  |
| H | 0.74341600  | -1.15485900 | 2.89325000  |
| C | 2.16618300  | -4.64497200 | -2.67368000 |
| H | 2.96951800  | -3.25377300 | -4.14149300 |
| H | 4.08433400  | -3.65525700 | -2.84082200 |
| H | 1.50892900  | -5.68378400 | -0.87694700 |
| H | 3.18589300  | -5.15544500 | -0.83329200 |
| C | 3.30189000  | -3.13853600 | 4.24464800  |
| H | 3.44800600  | -3.88866900 | 2.20775900  |
| H | 5.00017400  | -3.64523400 | 2.97910600  |
| H | 1.33124500  | -2.45084500 | 4.90249100  |
| H | 2.49716900  | -1.15751800 | 4.69756000  |
| H | 1.13270000  | -4.47536000 | -3.00983000 |
| H | 2.51929400  | -5.54741200 | -3.18656800 |
| H | 2.92168700  | -4.13306600 | 4.50559800  |
| H | 4.03414900  | -2.87858400 | 5.01810400  |
| C | -5.50606000 | -1.80792500 | -1.65303600 |
| H | -6.24287000 | -1.07121000 | -1.32061000 |
| H | -5.29572600 | -1.59708100 | -2.70448800 |

|                     |             |             |             |
|---------------------|-------------|-------------|-------------|
| H                   | -5.97431400 | -2.79833500 | -1.60276000 |
| Ts <sub>4d</sub> -2 |             |             |             |
| C                   | 3.60332800  | -2.08886500 | -0.33803600 |
| C                   | 4.04523100  | -1.31572200 | 0.93943000  |
| C                   | 3.27387200  | 0.01512500  | 0.95960200  |
| C                   | 2.90426800  | -1.10068900 | 1.93623300  |
| C                   | 2.40663400  | 0.04129300  | -0.32710900 |
| C                   | 2.88457200  | -1.05175600 | -1.15622000 |
| C                   | 4.61243900  | -3.02933800 | -1.07157100 |
| C                   | 3.85308800  | -4.06715000 | -1.91783100 |
| C                   | 5.69922400  | -2.35806200 | -1.92730300 |
| C                   | 5.46699200  | -1.44365400 | 1.44962900  |
| C                   | 3.12707100  | -1.02521600 | 3.40087700  |
| C                   | 2.30829700  | -1.58505200 | 4.29691300  |
| C                   | 3.89417000  | 1.29721400  | 1.40804200  |
| C                   | 3.49738800  | 2.02293100  | 2.45598000  |
| O                   | 4.14091400  | 0.12897300  | -2.11528300 |
| C                   | 3.58585800  | 1.21825500  | -1.90776100 |
| C                   | 4.00404300  | 2.50207100  | -2.54910200 |
| O                   | 2.56138600  | 1.29401800  | -1.06951300 |
| H                   | 2.79203600  | -2.77601800 | -0.04067000 |
| H                   | 1.97730700  | -1.62033900 | 1.68668900  |
| H                   | 2.42355600  | -1.30448900 | -2.10566100 |
| H                   | 5.11238800  | -3.57680400 | -0.26223800 |
| H                   | 4.55463600  | -4.77015900 | -2.37880000 |
| H                   | 3.14675200  | -4.64915200 | -1.31390500 |
| H                   | 3.29191300  | -3.59156900 | -2.73287300 |
| H                   | 6.44666900  | -3.10819100 | -2.20789200 |
| H                   | 6.21907700  | -1.54913100 | -1.40823900 |
| H                   | 5.28549400  | -1.94163300 | -2.85040100 |
| H                   | 6.20284800  | -1.23775600 | 0.66751600  |
| H                   | 5.65512200  | -0.73770900 | 2.26240500  |
| H                   | 5.66058700  | -2.44999500 | 1.83898700  |
| H                   | 4.00655100  | -0.49266700 | 3.75170100  |
| H                   | 2.50467900  | -1.52315300 | 5.36295200  |
| H                   | 1.41485300  | -2.13002300 | 3.99839500  |
| H                   | 4.73928000  | 1.65276500  | 0.81519400  |
| H                   | 3.99827700  | 2.94953900  | 2.72255200  |
| H                   | 2.67078300  | 1.71101800  | 3.08811400  |
| H                   | 4.65203000  | 3.04930700  | -1.85441000 |
| H                   | 3.12774000  | 3.12364600  | -2.74665400 |
| H                   | 4.55777700  | 2.30144500  | -3.46682300 |
| Au                  | 0.27845600  | -0.36374000 | -0.14301800 |
| H                   | -0.21321300 | 6.74460700  | -1.49220200 |

|   |             |             |             |
|---|-------------|-------------|-------------|
| C | 0.65765700  | 6.67257400  | -0.83229000 |
| C | 1.26457100  | 5.25312000  | -0.85075600 |
| H | 0.33336100  | 6.94001400  | 0.18031800  |
| H | 1.39530800  | 7.41459700  | -1.15935700 |
| C | 0.21021300  | 4.21842300  | -0.47198500 |
| C | 2.53328800  | 5.20125000  | 0.01363800  |
| H | 1.55887200  | 5.04239500  | -1.89037300 |
| C | 0.08049900  | 3.69375900  | 0.81152200  |
| C | -0.73552400 | 3.81621200  | -1.40962600 |
| H | 3.30290000  | 5.85910700  | -0.40567100 |
| H | 2.93847700  | 4.18558700  | 0.08031900  |
| H | 2.33772400  | 5.54844900  | 1.03497000  |
| C | -0.95267300 | 2.81873000  | 1.18017700  |
| H | 0.78273700  | 3.99892000  | 1.58140600  |
| C | -1.78260800 | 2.92465700  | -1.12836300 |
| H | -0.67987800 | 4.23824600  | -2.41187900 |
| C | -0.99808900 | 2.54317000  | 2.69746300  |
| C | -1.88767100 | 2.39037400  | 0.18860300  |
| C | -2.69452000 | 2.69887100  | -2.35699300 |
| H | 0.02201200  | 2.76352000  | 3.03694400  |
| C | -1.90848400 | 3.55214700  | 3.43245000  |
| C | -1.27893400 | 1.11381900  | 3.17646700  |
| C | -3.09270900 | 1.58021900  | 0.61638400  |
| C | -4.13714700 | 2.20231700  | -2.17392200 |
| C | -1.95056900 | 1.86182800  | -3.42375500 |
| H | -2.80222200 | 3.70155800  | -2.79272600 |
| H | -1.76245000 | 3.46720200  | 4.51587300  |
| H | -1.67888900 | 4.58221200  | 3.13970700  |
| H | -2.96646600 | 3.36589600  | 3.22609600  |
| H | -1.04103300 | 1.03932700  | 4.24442400  |
| H | -0.64998200 | 0.38981400  | 2.64757400  |
| H | -2.32415300 | 0.82362600  | 3.05398400  |
| C | -4.16698500 | 2.34924700  | 1.10282600  |
| C | -3.25047700 | 0.16686300  | 0.59677300  |
| H | -4.64051200 | 2.23906300  | -3.14709800 |
| H | -4.70248000 | 2.83677900  | -1.48681200 |
| H | -4.20716200 | 1.17541300  | -1.80716700 |
| H | -1.03151500 | 2.35954400  | -3.74888200 |
| H | -1.66130000 | 0.88035500  | -3.03639500 |
| H | -2.58164000 | 1.71111200  | -4.30749900 |
| C | -5.35304200 | 1.78594800  | 1.56468800  |
| H | -4.05624400 | 3.42909900  | 1.10518200  |
| C | -4.45796800 | -0.38604700 | 1.07146400  |
| P | -2.00280800 | -1.04498200 | -0.04565100 |

|      |             |             |             |
|------|-------------|-------------|-------------|
| C    | -5.50014700 | 0.40149800  | 1.55194200  |
| H    | -6.15171600 | 2.42470200  | 1.93058900  |
| H    | -4.59294200 | -1.46142200 | 1.08163300  |
| C    | -2.15762400 | -2.59294800 | 1.01916400  |
| C    | -2.63506700 | -1.48769400 | -1.77124200 |
| H    | -6.41202200 | -0.06618100 | 1.91100500  |
| C    | -2.02651400 | -2.31011100 | 2.53121700  |
| C    | -1.13719400 | -3.67831100 | 0.60274700  |
| H    | -3.16161300 | -2.99587300 | 0.82891600  |
| C    | -3.94700300 | -2.33381200 | -1.84003800 |
| C    | -1.53035100 | -2.06485300 | -2.69303400 |
| H    | -2.87555000 | -0.49552300 | -2.16190800 |
| C    | -2.21755600 | -3.59532300 | 3.35564700  |
| H    | -1.02890200 | -1.89726500 | 2.73316700  |
| H    | -2.74923800 | -1.55468900 | 2.85165300  |
| C    | -1.32029400 | -4.96411200 | 1.42959900  |
| H    | -1.22967800 | -3.91651100 | -0.46044800 |
| H    | -0.12002600 | -3.28793100 | 0.75074900  |
| C    | -3.71025300 | -3.75876600 | -2.36273800 |
| H    | -4.46334700 | -2.36816800 | -0.87688300 |
| H    | -4.64111100 | -1.82186100 | -2.51827500 |
| C    | -2.15054400 | -2.55739300 | -4.01005600 |
| H    | -0.99433200 | -2.89081200 | -2.21089800 |
| H    | -0.78126200 | -1.28788000 | -2.88758400 |
| C    | -1.23088800 | -4.69286300 | 2.93668900  |
| H    | -2.10291000 | -3.36189900 | 4.42093800  |
| H    | -3.24721900 | -3.95943200 | 3.22672200  |
| H    | -0.56684400 | -5.70078700 | 1.12504500  |
| H    | -2.29937200 | -5.40607000 | 1.19474300  |
| C    | -3.10316700 | -3.75668700 | -3.78301200 |
| H    | -3.04636100 | -4.29559700 | -1.67342800 |
| H    | -4.65671700 | -4.31117400 | -2.35736800 |
| H    | -1.35916700 | -2.82789000 | -4.71823700 |
| H    | -2.69765300 | -1.72331600 | -4.46949400 |
| H    | -0.20733400 | -4.37800100 | 3.18932300  |
| H    | -1.42147600 | -5.61360900 | 3.50028500  |
| H    | -2.56747000 | -4.69929100 | -3.94585900 |
| H    | -3.90481000 | -3.72752800 | -4.53010000 |
| 5d-2 |             |             |             |
| C    | -1.11172300 | 1.06972700  | -0.54291400 |
| C    | -1.36216500 | -0.35980700 | 0.04019000  |
| C    | -0.84630800 | -1.49125800 | -0.85287700 |
| C    | 0.98198600  | 0.05960300  | -0.12543700 |
| C    | 0.40120300  | 1.14945700  | -0.64107300 |

|   |             |             |             |
|---|-------------|-------------|-------------|
| C | 0.00598000  | -0.97742400 | 0.32680600  |
| C | -1.44160600 | -2.84416200 | -0.83673900 |
| C | -1.60385400 | -3.60132400 | -1.92684200 |
| C | 0.35942400  | -1.86688700 | 1.47367200  |
| C | 0.15416900  | -1.57068600 | 2.75864600  |
| O | 3.20721700  | 1.67820600  | -0.69905500 |
| C | 3.34141900  | 0.55118900  | -0.28855700 |
| C | 4.65629300  | -0.13537000 | -0.00689100 |
| O | 2.31195600  | -0.30422000 | -0.00750500 |
| H | -0.48716600 | -1.18520300 | -1.83485300 |
| H | 0.92304300  | 1.97094900  | -1.10495600 |
| H | -1.74982600 | -3.24416300 | 0.12764600  |
| H | -2.04074500 | -4.59421900 | -1.87073300 |
| H | -1.30715700 | -3.25455100 | -2.91453200 |
| H | 0.84431500  | -2.80913800 | 1.21691700  |
| H | 0.45834400  | -2.24775900 | 3.55278700  |
| H | -0.31932000 | -0.64107000 | 3.06549500  |
| H | 4.70686500  | -0.43560800 | 1.04490400  |
| H | 5.47582400  | 0.54524900  | -0.23936000 |
| H | 4.74402900  | -1.04482900 | -0.61036000 |
| C | -2.56093500 | -0.63952900 | 0.92658000  |
| H | -2.44712100 | -1.58694900 | 1.45787600  |
| H | -2.69241700 | 0.13609400  | 1.68733100  |
| C | -1.74397400 | 2.25735500  | 0.24941900  |
| H | -1.63384300 | 2.04346800  | 1.32232700  |
| C | -1.02352900 | 3.58991400  | -0.02131000 |
| H | -1.53515100 | 4.40832100  | 0.49868500  |
| H | 0.01530200  | 3.57364200  | 0.32059800  |
| H | -1.02315200 | 3.83107900  | -1.09261000 |
| C | -3.23867400 | 2.42401600  | -0.07533200 |
| H | -3.68353300 | 3.21651100  | 0.53820700  |
| H | -3.36862700 | 2.70971400  | -1.12755400 |
| H | -3.81577900 | 1.51106700  | 0.09074500  |
| H | -1.53932300 | 1.11445100  | -1.55862200 |
| H | -3.48419900 | -0.69782700 | 0.33850500  |

T<sub>Sd</sub>-2

|   |             |             |             |
|---|-------------|-------------|-------------|
| C | 0.75715000  | 1.38779100  | 0.48992600  |
| C | -0.73659000 | 1.13717400  | 0.53583100  |
| C | 1.12742200  | 2.60540000  | -0.42178700 |
| C | 0.07329500  | 3.72620700  | -0.35557600 |
| C | 2.49787000  | 3.20327500  | -0.05699400 |
| C | 1.35436800  | -0.03290500 | 0.09494600  |
| C | 0.14843200  | -0.84848800 | -0.35796100 |
| C | -1.03465600 | -0.07377100 | 0.04235700  |

|   |             |             |             |
|---|-------------|-------------|-------------|
| O | -2.25413900 | -0.70986900 | -0.11836500 |
| C | -3.45362800 | -0.08685200 | 0.08981700  |
| C | -4.57814200 | -1.04605100 | -0.21802600 |
| O | -3.58182600 | 1.05417400  | 0.46090000  |
| C | 1.30183500  | -0.96796800 | 1.28591500  |
| C | 1.81369500  | -2.25830600 | 1.45868700  |
| C | 2.53441500  | -3.03092400 | 0.56309600  |
| C | 1.09109500  | -2.91697100 | -1.40473300 |
| C | 0.05775400  | -2.11210900 | -0.96769600 |
| C | 2.63712100  | 0.01046400  | -0.73286000 |
| H | 1.11806700  | 1.63982300  | 1.49853800  |
| H | -1.44964800 | 1.84766800  | 0.91972700  |
| H | 1.15328000  | 2.25642400  | -1.46338700 |
| H | 0.40057100  | 4.58375400  | -0.95486700 |
| H | -0.89935400 | 3.40309000  | -0.73728400 |
| H | -0.06855600 | 4.08042600  | 0.67405800  |
| H | 2.75758600  | 4.02083500  | -0.73995800 |
| H | 3.30970000  | 2.47348100  | -0.09125900 |
| H | 2.47043400  | 3.61953600  | 0.95869500  |
| H | -4.52898500 | -1.35928800 | -1.26626900 |
| H | -5.53277100 | -0.55688700 | -0.02246700 |
| H | -4.48644200 | -1.94718700 | 0.39693700  |
| H | 0.67826800  | -0.60054400 | 2.09704900  |
| H | 1.40610900  | -2.77989800 | 2.32599400  |
| H | 3.24144700  | -2.60257000 | -0.13039600 |
| H | 2.70831700  | -4.07778300 | 0.79724600  |
| H | 2.00035700  | -2.51221400 | -1.82169900 |
| H | 0.86539100  | -3.93360900 | -1.71509300 |
| H | -0.92991400 | -2.56608400 | -0.90197300 |
| H | 2.91585100  | -0.96070600 | -1.13319300 |
| H | 3.47250800  | 0.35456400  | -0.11496500 |
| H | 2.53689400  | 0.68693200  | -1.58536600 |

6d-2

|   |             |             |             |
|---|-------------|-------------|-------------|
| C | -0.68614500 | 1.29919300  | -0.36520200 |
| C | 0.81885100  | 1.21228000  | -0.21583900 |
| C | -1.32237700 | 2.57898300  | 0.24085500  |
| C | -0.64484900 | 3.84848500  | -0.30768600 |
| C | -2.83526200 | 2.67024600  | -0.02429500 |
| C | -1.18679000 | -0.10995500 | 0.16698300  |
| C | 0.06069900  | -0.99350400 | -0.01148000 |
| C | 1.19616600  | -0.06451900 | -0.04512400 |
| O | 2.45621700  | -0.63304900 | 0.04653900  |
| C | 3.61116800  | 0.09454500  | -0.01303100 |
| C | 4.79730000  | -0.83362100 | 0.09726300  |

|                     |             |             |             |
|---------------------|-------------|-------------|-------------|
| O                   | 3.66599700  | 1.29444800  | -0.13183600 |
| C                   | -2.39757800 | -0.61181100 | -0.60490200 |
| C                   | -2.88365200 | -1.85722700 | -0.59675600 |
| C                   | -2.30008400 | -3.02697300 | 0.16274700  |
| C                   | -0.86731600 | -3.39352000 | -0.25948500 |
| C                   | 0.18709400  | -2.32300700 | -0.15458300 |
| C                   | -1.49379000 | -0.03375300 | 1.68991000  |
| H                   | -0.91249000 | 1.33103400  | -1.44623100 |
| H                   | 1.48989900  | 2.04991500  | -0.31261500 |
| H                   | -1.16357500 | 2.56558900  | 1.32728800  |
| H                   | -1.14274200 | 4.74409300  | 0.08209400  |
| H                   | 0.41106300  | 3.91407000  | -0.02921900 |
| H                   | -0.70725300 | 3.88687900  | -1.40332300 |
| H                   | -3.24484700 | 3.58722700  | 0.41562600  |
| H                   | -3.39276900 | 1.82624200  | 0.39188600  |
| H                   | -3.04032800 | 2.70444100  | -1.10269800 |
| H                   | 4.74915700  | -1.39892500 | 1.03370900  |
| H                   | 5.71687800  | -0.24873100 | 0.06278500  |
| H                   | 4.78652200  | -1.55868700 | -0.72329900 |
| H                   | -2.91549000 | 0.12856800  | -1.21152400 |
| H                   | -3.76883900 | -2.05928300 | -1.19896900 |
| H                   | -2.31198400 | -2.82553600 | 1.24186200  |
| H                   | -2.93500500 | -3.90862500 | 0.01717100  |
| H                   | -0.54001600 | -4.26149000 | 0.33208500  |
| H                   | -0.88442600 | -3.75001000 | -1.30247800 |
| H                   | 1.20541900  | -2.69372600 | -0.26845800 |
| H                   | -1.70614200 | -1.02784900 | 2.08945400  |
| H                   | -2.35913700 | 0.60216000  | 1.89574200  |
| H                   | -0.63221100 | 0.36639400  | 2.23524400  |
| Ts <sub>1c</sub> -2 |             |             |             |
| C                   | -4.57221400 | 0.06011500  | -1.06267900 |
| C                   | -4.74814000 | 0.72059700  | 0.31826200  |
| C                   | -5.02572400 | -0.11660300 | 1.40189100  |
| C                   | -2.98489100 | -0.09796900 | 0.52502800  |
| C                   | -3.39240900 | -0.87551000 | -0.69304000 |
| C                   | -5.82769600 | -0.44233400 | -1.82396600 |
| C                   | -5.40258900 | -1.07525500 | -3.16063000 |
| C                   | -6.77839900 | -1.36312200 | -1.04510600 |
| C                   | -1.94768900 | 0.40333300  | 1.14733800  |
| C                   | -4.87803400 | 2.21829800  | 0.39694500  |
| C                   | -5.39013700 | 0.28551300  | 2.74547600  |
| C                   | -5.82371300 | -0.61408400 | 3.64790100  |
| C                   | -1.85908300 | 1.37221500  | 2.24248900  |
| C                   | -2.28980400 | 1.18312800  | 3.49811500  |

|    |             |             |             |
|----|-------------|-------------|-------------|
| O  | -3.80865400 | -2.22217400 | -0.37962000 |
| C  | -2.98820400 | -3.24157300 | -0.77677200 |
| C  | -3.55179100 | -4.57417300 | -0.35631000 |
| O  | -1.95687100 | -3.06487000 | -1.38496200 |
| H  | -4.11651700 | 0.82341100  | -1.70468300 |
| H  | -5.08531800 | -1.18425800 | 1.21266400  |
| H  | -2.59555500 | -0.93345600 | -1.43548700 |
| H  | -6.39339500 | 0.47046000  | -2.06281600 |
| H  | -6.28226300 | -1.30544200 | -3.77061700 |
| H  | -4.76283500 | -0.40092100 | -3.74211200 |
| H  | -4.85386600 | -2.01129600 | -3.00579200 |
| H  | -7.65061200 | -1.59451400 | -1.66626800 |
| H  | -7.15234400 | -0.89016200 | -0.13032100 |
| H  | -6.30129200 | -2.30927300 | -0.77381300 |
| H  | -5.90826200 | 2.50804500  | 0.14822300  |
| H  | -4.65020200 | 2.61158100  | 1.38987600  |
| H  | -4.21443700 | 2.70591000  | -0.32176500 |
| H  | -5.37238400 | 1.33998300  | 3.00170200  |
| H  | -6.16565400 | -0.31155200 | 4.63265500  |
| H  | -5.86086400 | -1.67739300 | 3.42322300  |
| H  | -1.30069100 | 2.27549900  | 1.99677200  |
| H  | -2.11849500 | 1.93724100  | 4.26087000  |
| H  | -2.78387200 | 0.26863600  | 3.80807200  |
| H  | -4.56799200 | -4.69853500 | -0.74395000 |
| H  | -3.60824400 | -4.62804500 | 0.73627200  |
| H  | -2.91210800 | -5.37361500 | -0.73072300 |
| H  | 2.54401000  | -1.99787400 | 4.94518300  |
| C  | 3.16462300  | -1.85897000 | 4.05280900  |
| C  | 2.27162200  | -1.59469900 | 2.83046700  |
| C  | 4.08409500  | -3.08677600 | 3.83889500  |
| H  | 3.77125900  | -0.96271300 | 4.24053900  |
| C  | 3.14703800  | -1.19511600 | 1.61517600  |
| H  | 1.67079400  | -2.48609200 | 2.61791700  |
| H  | 1.55648600  | -0.79125000 | 3.04214200  |
| C  | 4.37339400  | -3.34564000 | 2.34416700  |
| H  | 3.62497300  | -3.98166500 | 4.27537300  |
| H  | 5.02601800  | -2.93220000 | 4.37829400  |
| P  | 2.15628200  | -1.03656100 | 0.01443500  |
| C  | 4.46173900  | -2.03777100 | 1.54341800  |
| H  | 3.44335600  | -0.15568400 | 1.77758700  |
| H  | 3.58849700  | -3.98192800 | 1.91668600  |
| H  | 5.30844600  | -3.90628400 | 2.23198000  |
| Au | -0.03870300 | -0.25255500 | 0.48378500  |
| C  | 3.21822400  | 0.03963600  | -1.06480600 |



|   |             |             |             |
|---|-------------|-------------|-------------|
| C | 2.12550500  | -2.73498800 | -0.79440400 |
| H | 4.75837800  | -2.25087700 | 0.51263900  |
| H | 5.27503700  | -1.42726600 | 1.95570600  |
| C | 3.04400400  | 1.43532600  | -1.27778600 |
| C | 4.30370600  | -0.60669400 | -1.69159400 |
| C | 1.66439100  | -2.70649400 | -2.26799600 |
| C | 1.25531500  | -3.73609500 | 0.00123000  |
| H | 3.16054000  | -3.10198900 | -0.76273600 |
| C | 1.95947300  | 2.34483200  | -0.73761200 |
| C | 3.97927200  | 2.09164800  | -2.10078300 |
| C | 5.21025700  | 0.06955200  | -2.50298000 |
| H | 4.44571800  | -1.67244500 | -1.55839700 |
| C | 1.75134000  | -4.11073800 | -2.89224000 |
| H | 0.62584000  | -2.35586500 | -2.31002700 |
| H | 2.26749600  | -2.00519500 | -2.85218400 |
| C | 1.33651000  | -5.14272100 | -0.62024700 |
| H | 1.57046500  | -3.78639900 | 1.04723100  |
| H | 0.21378100  | -3.39227400 | -0.00873000 |
| C | 0.83095600  | 2.64852000  | -1.56366500 |
| C | 2.15357300  | 3.09356000  | 0.45708800  |
| C | 5.04627500  | 1.43638100  | -2.70855100 |
| H | 3.85761100  | 3.15963300  | -2.25284400 |
| H | 6.03002500  | -0.47087000 | -2.96683800 |
| C | 0.93041900  | -5.13747800 | -2.10032000 |
| H | 1.40609200  | -4.06575200 | -3.93226800 |
| H | 2.80451200  | -4.42742100 | -2.92712400 |
| H | 0.69679000  | -5.82709400 | -0.04887600 |
| H | 2.36393300  | -5.52298700 | -0.52050000 |
| C | -0.07531400 | 3.63203000  | -1.14467800 |
| C | 0.53359700  | 2.11259300  | -2.97984400 |
| C | 1.21008400  | 4.08015200  | 0.79631500  |
| C | 3.30838300  | 3.02765100  | 1.48395600  |
| H | 5.73971000  | 1.99093500  | -3.33419600 |
| H | -0.13425800 | -4.88220500 | -2.18011800 |
| H | 1.05664000  | -6.13820800 | -2.53121300 |
| C | 0.09553900  | 4.37906500  | 0.02222100  |
| H | -0.91596400 | 3.85878500  | -1.79654600 |
| H | -0.53370300 | 2.32513700  | -3.12490400 |
| C | 1.26954800  | 2.93004200  | -4.06529100 |
| C | 0.68468700  | 0.60905800  | -3.24470400 |
| H | 1.38815200  | 4.67051700  | 1.69326900  |
| C | 4.67471400  | 2.45127300  | 1.08219600  |
| C | 2.80654900  | 2.40395700  | 2.80721300  |
| H | 3.51318800  | 4.08171000  | 1.71613000  |

|   |             |            |             |
|---|-------------|------------|-------------|
| C | -0.81889000 | 5.54150800 | 0.38780300  |
| H | 0.88356100  | 2.66650300 | -5.05728400 |
| H | 1.12473600  | 4.00592900 | -3.92016500 |
| H | 2.34422200  | 2.72645000 | -4.06444000 |
| H | 0.20987900  | 0.36422100 | -4.20262500 |
| H | 0.19308700  | 0.01325100 | -2.46773600 |
| H | 1.72804600  | 0.29606700 | -3.31053000 |
| H | 5.37597200  | 2.62095500 | 1.90762400  |
| H | 5.08182700  | 2.94670000 | 0.19726000  |
| H | 4.65973200  | 1.37772800 | 0.88061300  |
| H | 1.97594900  | 2.97980900 | 3.22769100  |
| H | 2.44483700  | 1.38175200 | 2.66314700  |
| H | 3.61054800  | 2.38245600 | 3.55221500  |
| C | -0.57889500 | 6.74188500 | -0.55080100 |
| C | -2.30821300 | 5.15793900 | 0.41139300  |
| H | -0.54497900 | 5.85886400 | 1.40316800  |
| H | 0.47181900  | 7.05008300 | -0.53787100 |
| H | -0.84167700 | 6.49204700 | -1.58571700 |
| H | -1.18989200 | 7.59938600 | -0.24599000 |
| H | -2.91802600 | 6.01205500 | 0.72703500  |
| H | -2.49691100 | 4.33152500 | 1.10593200  |
| H | -2.65982000 | 4.85433900 | -0.58231700 |

2c-2

|   |             |             |             |
|---|-------------|-------------|-------------|
| C | -4.23234700 | -0.62270900 | -0.84314500 |
| C | -5.05674200 | -0.48053600 | 0.37438800  |
| C | -4.27950400 | -0.83292200 | 1.57480400  |
| C | -2.80444600 | -0.85853100 | 1.07568800  |
| C | -2.92529500 | -1.29648500 | -0.36464600 |
| C | -4.91144200 | -0.99425400 | -2.19121600 |
| C | -3.89580800 | -0.93553600 | -3.34256800 |
| C | -5.65293200 | -2.34217500 | -2.15723900 |
| C | -1.67732000 | -0.52397200 | 1.72396600  |
| C | -6.42253700 | 0.06096300  | 0.41467100  |
| C | -4.71591400 | -0.18722600 | 2.86130900  |
| C | -5.52362100 | -0.76035300 | 3.75525800  |
| C | -1.59800900 | -0.20857600 | 3.15950100  |
| C | -1.85637700 | -1.06510400 | 4.15941600  |
| O | -3.11044000 | -2.74422300 | -0.38659500 |
| C | -2.15125800 | -3.49966200 | -0.99540800 |
| C | -2.38932300 | -4.96854700 | -0.75143100 |
| O | -1.23331100 | -3.03229500 | -1.63265700 |
| H | -3.92736900 | 0.45096300  | -0.93143500 |
| H | -4.54956500 | -1.92131800 | 1.60372300  |
| H | -2.06263400 | -1.04514500 | -0.97644400 |

|    |             |             |             |
|----|-------------|-------------|-------------|
| H  | -5.65953700 | -0.21089000 | -2.37636400 |
| H  | -4.40285300 | -1.11862500 | -4.29548500 |
| H  | -3.41291900 | 0.04680000  | -3.40573900 |
| H  | -3.11001500 | -1.68965300 | -3.23026900 |
| H  | -6.20014000 | -2.48200800 | -3.09521700 |
| H  | -6.38318400 | -2.39393300 | -1.34039900 |
| H  | -4.96263400 | -3.17988000 | -2.04061400 |
| H  | -6.98146000 | -0.09554500 | -0.50960900 |
| H  | -6.97034200 | -0.30036000 | 1.29109000  |
| H  | -6.32602300 | 1.15176700  | 0.56663100  |
| H  | -4.35855200 | 0.82808000  | 3.01680300  |
| H  | -5.83233900 | -0.23552000 | 4.65411600  |
| H  | -5.88320800 | -1.78157400 | 3.64399000  |
| H  | -1.19490000 | 0.77555800  | 3.40388800  |
| H  | -1.70349500 | -0.78510400 | 5.19776700  |
| H  | -2.19955000 | -2.07889500 | 3.96962300  |
| H  | -2.00018600 | -5.23153300 | 0.23954200  |
| H  | -1.85776900 | -5.55363500 | -1.50314500 |
| H  | -3.45555300 | -5.20914900 | -0.76305700 |
| H  | 3.83848300  | -1.08447600 | 4.72758400  |
| C  | 4.24309900  | -0.76980900 | 3.75898400  |
| C  | 3.14208100  | -0.82631500 | 2.68884700  |
| C  | 5.46070700  | -1.64470100 | 3.37335100  |
| H  | 4.55520500  | 0.27603000  | 3.88441700  |
| C  | 3.64820500  | -0.18286600 | 1.37101300  |
| H  | 2.83835400  | -1.86761800 | 2.53517200  |
| H  | 2.24372000  | -0.30046100 | 3.03067600  |
| C  | 5.59893300  | -1.80467900 | 1.84331800  |
| H  | 5.37221300  | -2.63652300 | 3.83247300  |
| H  | 6.37368700  | -1.19744100 | 3.78417300  |
| P  | 2.42823100  | -0.40976400 | -0.06153900 |
| C  | 5.14347700  | -0.54154800 | 1.09685400  |
| H  | 3.60209900  | 0.90048300  | 1.51666700  |
| H  | 5.00709000  | -2.66328900 | 1.50189800  |
| H  | 6.63813900  | -2.03219900 | 1.57916700  |
| Au | 0.18727600  | -0.41098700 | 0.78442200  |
| C  | 2.91598200  | 0.92883500  | -1.25768800 |
| C  | 2.85388800  | -2.05133400 | -0.88703100 |
| H  | 5.35314700  | -0.64245200 | 0.02907900  |
| H  | 5.75953800  | 0.30307700  | 1.43091600  |
| C  | 2.23404800  | 2.16343600  | -1.44587200 |
| C  | 4.09047200  | 0.69203600  | -2.00151200 |
| C  | 2.24787700  | -2.19760000 | -2.29889100 |
| C  | 2.41361300  | -3.24667300 | -0.00739700 |

|   |             |             |             |
|---|-------------|-------------|-------------|
| H | 3.94897700  | -2.08369300 | -0.97267900 |
| C | 0.92773500  | 2.61199800  | -0.82448200 |
| C | 2.79914300  | 3.09524600  | -2.33737400 |
| C | 4.61802500  | 1.62704900  | -2.88771600 |
| H | 4.60696500  | -0.25552000 | -1.90177400 |
| C | 2.65254600  | -3.53612800 | -2.94181800 |
| H | 1.15507100  | -2.15817600 | -2.22361000 |
| H | 2.55997500  | -1.37048600 | -2.94330500 |
| C | 2.80364900  | -4.58925400 | -0.65254300 |
| H | 2.85592800  | -3.18582700 | 0.99130700  |
| H | 1.32430100  | -3.20619100 | 0.12430700  |
| C | -0.27920900 | 2.46246900  | -1.57753900 |
| C | 0.89186900  | 3.36762300  | 0.37937200  |
| C | 3.96952500  | 2.84831700  | -3.04906100 |
| H | 2.29329900  | 4.04753700  | -2.46331000 |
| H | 5.52443300  | 1.39897200  | -3.44074700 |
| C | 2.23405300  | -4.72682000 | -2.06987000 |
| H | 2.19644300  | -3.61063300 | -3.93652100 |
| H | 3.74183800  | -3.55637800 | -3.09506500 |
| H | 2.45412700  | -5.41060100 | -0.01434100 |
| H | 3.90008600  | -4.66943900 | -0.68836500 |
| C | -1.47006900 | 2.99392100  | -1.06638800 |
| C | -0.43426200 | 1.87124000  | -2.99393900 |
| C | -0.34206200 | 3.87826800  | 0.82121100  |
| C | 2.05301300  | 3.77122000  | 1.31595300  |
| H | 4.36428900  | 3.60135900  | -3.72510800 |
| H | 1.13686900  | -4.76073200 | -2.01854000 |
| H | 2.56471800  | -5.66943100 | -2.52281700 |
| C | -1.53474200 | 3.70631200  | 0.13146000  |
| H | -2.37168900 | 2.88832400  | -1.66724800 |
| H | -1.50856600 | 1.65334200  | -3.07261300 |
| C | -0.14804900 | 2.91972300  | -4.09168900 |
| C | 0.26818100  | 0.54565500  | -3.31075600 |
| H | -0.35315900 | 4.46814000  | 1.73592200  |
| C | 3.49260500  | 3.81633100  | 0.78129000  |
| C | 1.97489200  | 2.97854500  | 2.64038900  |
| H | 1.82469000  | 4.81260300  | 1.58167100  |
| C | -2.82516100 | 4.34575300  | 0.62598700  |
| H | -0.46756900 | 2.53474600  | -5.06758000 |
| H | -0.68744600 | 3.85400000  | -3.90177300 |
| H | 0.91873100  | 3.14894300  | -4.16127400 |
| H | -0.13961900 | 0.13604600  | -4.24305300 |
| H | 0.10041300  | -0.19295400 | -2.52130100 |
| H | 1.34409500  | 0.66289500  | -3.45104100 |

|   |             |            |             |
|---|-------------|------------|-------------|
| H | 4.13315200  | 4.25956600 | 1.55271700  |
| H | 3.57489100  | 4.43936500 | -0.11315000 |
| H | 3.90328000  | 2.83384500 | 0.53775000  |
| H | 1.01656800  | 3.14044100 | 3.14484000  |
| H | 2.07160400  | 1.90249500 | 2.47237600  |
| H | 2.77173400  | 3.29312100 | 3.32469300  |
| C | -3.22045800 | 5.55773500 | -0.24047000 |
| C | -3.98581100 | 3.33771500 | 0.71759300  |
| H | -2.63469600 | 4.71357600 | 1.64302000  |
| H | -2.41668800 | 6.30052200 | -0.26630200 |
| H | -3.42738300 | 5.25423400 | -1.27378100 |
| H | -4.12013900 | 6.04331700 | 0.15547500  |
| H | -4.86914200 | 3.80733700 | 1.16667000  |
| H | -3.70136600 | 2.47259000 | 1.32852600  |
| H | -4.27426600 | 2.97733200 | -0.27941400 |

Ts<sub>2c</sub>-2

|   |             |             |             |
|---|-------------|-------------|-------------|
| C | -4.47492400 | -0.80613400 | -0.96032800 |
| C | -5.22580500 | -0.26216100 | 0.23201100  |
| C | -4.42619900 | -0.12041800 | 1.35081200  |
| C | -2.91182400 | -0.51907700 | 0.89682500  |
| C | -3.09800900 | -1.25041900 | -0.41968100 |
| C | -5.26399400 | -1.71703200 | -1.94165200 |
| C | -4.43219600 | -2.03359300 | -3.19500600 |
| C | -5.86350200 | -2.98787400 | -1.31515900 |
| C | -1.76289500 | -0.27030500 | 1.57961800  |
| C | -6.60445900 | 0.28231700  | 0.08307700  |
| C | -4.74064300 | 0.67516000  | 2.56331100  |
| C | -5.80749000 | 0.47180000  | 3.34073400  |
| C | -1.71784500 | 0.01158200  | 3.01515500  |
| C | -2.22606600 | -0.79188700 | 3.96612500  |
| O | -3.09621300 | -2.66982600 | -0.09833700 |
| C | -2.10217900 | -3.44373700 | -0.62170600 |
| C | -2.16878700 | -4.84531800 | -0.07090500 |
| O | -1.28098800 | -3.03310800 | -1.41212000 |
| H | -4.25603600 | 0.11685100  | -1.53177300 |
| H | -3.87929900 | -1.16775300 | 1.64386000  |
| H | -2.28307200 | -1.05962100 | -1.11490100 |
| H | -6.11058300 | -1.09934000 | -2.27266200 |
| H | -5.03705200 | -2.59244100 | -3.91681700 |
| H | -4.08978200 | -1.11693800 | -3.69003700 |
| H | -3.54837900 | -2.63748200 | -2.96442400 |
| H | -6.55897900 | -3.45126500 | -2.02311700 |
| H | -6.42429900 | -2.77224800 | -0.39786300 |
| H | -5.09679500 | -3.72452300 | -1.06764000 |

|    |             |             |             |
|----|-------------|-------------|-------------|
| H  | -7.33397700 | -0.53689700 | 0.01501000  |
| H  | -6.88751500 | 0.92080700  | 0.92105400  |
| H  | -6.69349000 | 0.84916500  | -0.85214900 |
| H  | -4.04702500 | 1.47985600  | 2.79170400  |
| H  | -6.01101200 | 1.11723100  | 4.18979300  |
| H  | -6.50570300 | -0.34366600 | 3.16977500  |
| H  | -1.12146500 | 0.87248300  | 3.31682800  |
| H  | -2.08837000 | -0.57422400 | 5.02088500  |
| H  | -2.74757600 | -1.71563300 | 3.72504000  |
| H  | -3.20052500 | -5.20348100 | -0.02003800 |
| H  | -1.76723000 | -4.84896400 | 0.94947100  |
| H  | -1.56625700 | -5.50957400 | -0.69146500 |
| H  | 3.41216100  | -1.28012000 | 4.84842400  |
| C  | 3.90828800  | -1.01399200 | 3.90820900  |
| C  | 2.88001000  | -0.97356100 | 2.76702200  |
| C  | 5.05919400  | -2.00453400 | 3.60698000  |
| H  | 4.31009700  | -0.00184900 | 4.05188700  |
| C  | 3.53105200  | -0.39723000 | 1.48236000  |
| H  | 2.48390800  | -1.98129700 | 2.59770800  |
| H  | 2.01889100  | -0.35630900 | 3.04697600  |
| C  | 5.28511500  | -2.18883900 | 2.09027100  |
| H  | 4.84455800  | -2.97975000 | 4.05983600  |
| H  | 5.98060900  | -1.64388300 | 4.07923900  |
| P  | 2.39682000  | -0.53303900 | -0.02998200 |
| C  | 5.00222400  | -0.89503700 | 1.31268100  |
| H  | 3.57447300  | 0.68779500  | 1.61550400  |
| H  | 4.63982200  | -2.99099600 | 1.71094300  |
| H  | 6.31381600  | -2.51451600 | 1.89800700  |
| Au | 0.12079700  | -0.32522100 | 0.68647100  |
| C  | 3.05857800  | 0.75552200  | -1.19112800 |
| C  | 2.73968800  | -2.20812000 | -0.82370500 |
| H  | 5.27524100  | -1.02051700 | 0.26162900  |
| H  | 5.66837300  | -0.10803800 | 1.68862200  |
| C  | 2.48641300  | 2.03753100  | -1.41882300 |
| C  | 4.25280600  | 0.42149400  | -1.86239400 |
| C  | 2.21949900  | -2.31904900 | -2.27234900 |
| C  | 2.16133500  | -3.36515300 | 0.02560600  |
| H  | 3.83273000  | -2.31955200 | -0.83809600 |
| C  | 1.19247600  | 2.59756500  | -0.86472000 |
| C  | 3.16960500  | 2.91324800  | -2.28441500 |
| C  | 4.89940900  | 1.30491300  | -2.72183900 |
| H  | 4.68862400  | -0.56113100 | -1.72509500 |
| C  | 2.58223300  | -3.68323600 | -2.88565300 |
| H  | 1.12906900  | -2.20814900 | -2.26839800 |

|   |             |             |             |
|---|-------------|-------------|-------------|
| H | 2.62588100  | -1.51644800 | -2.89438700 |
| C | 2.51465600  | -4.73260600 | -0.58830400 |
| H | 2.53237100  | -3.32394100 | 1.05387900  |
| H | 1.07036900  | -3.25799400 | 0.07237500  |
| C | 0.01209500  | 2.53480200  | -1.67010500 |
| C | 1.16755000  | 3.38078500  | 0.32304700  |
| C | 4.35442500  | 2.56936000  | -2.92860400 |
| H | 2.74593500  | 3.89979500  | -2.44465000 |
| H | 5.81617800  | 1.00391500  | -3.22006000 |
| C | 2.03858900  | -4.84373700 | -2.04230700 |
| H | 2.18769300  | -3.73537800 | -3.90759200 |
| H | 3.67594200  | -3.76844200 | -2.96856400 |
| H | 2.07261900  | -5.52847900 | 0.02433100  |
| H | 3.60409400  | -4.87792600 | -0.54549900 |
| C | -1.14832900 | 3.18406300  | -1.22907600 |
| C | -0.13298500 | 1.92797000  | -3.08129700 |
| C | -0.03264600 | 4.01580800  | 0.68913600  |
| C | 2.31030000  | 3.68773500  | 1.31714500  |
| H | 4.84169300  | 3.28230200  | -3.58752400 |
| H | 0.94046700  | -4.81741500 | -2.06718500 |
| H | 2.34737200  | -5.80511200 | -2.47031000 |
| C | -1.20275100 | 3.93717100  | -0.05618100 |
| H | -2.02946800 | 3.13360500  | -1.86473100 |
| H | -1.21697200 | 1.80491100  | -3.20602200 |
| C | 0.29817700  | 2.92285400  | -4.18192500 |
| C | 0.46208800  | 0.53948800  | -3.34344900 |
| H | -0.03286900 | 4.63022400  | 1.58791800  |
| C | 3.77547600  | 3.58857400  | 0.86569600  |
| C | 2.08325500  | 2.92081000  | 2.63950300  |
| H | 2.16807100  | 4.74899000  | 1.56263400  |
| C | -2.44223300 | 4.72386300  | 0.34885900  |
| H | -0.00878400 | 2.54681300  | -5.16523300 |
| H | -0.16358700 | 3.90524500  | -4.03557500 |
| H | 1.38361800  | 3.05473200  | -4.20343700 |
| H | 0.06552900  | 0.15031000  | -4.28915600 |
| H | 0.18826500  | -0.16732400 | -2.55392300 |
| H | 1.54982600  | 0.55714600  | -3.43051000 |
| H | 4.41069900  | 3.98400100  | 1.66705000  |
| H | 3.96652400  | 4.18387700  | -0.03083100 |
| H | 4.10465600  | 2.56723400  | 0.66014500  |
| H | 1.12006200  | 3.18414100  | 3.08878500  |
| H | 2.07918300  | 1.83900000  | 2.47878500  |
| H | 2.86957100  | 3.15850600  | 3.36563800  |
| C | -2.58494500 | 5.99955500  | -0.50669900 |

|      |             |             |             |
|------|-------------|-------------|-------------|
| C    | -3.73201400 | 3.88733600  | 0.29600900  |
| H    | -2.29710900 | 5.04081200  | 1.39073700  |
| H    | -1.68861000 | 6.62464100  | -0.43668400 |
| H    | -2.73577900 | 5.74811100  | -1.56341000 |
| H    | -3.44332400 | 6.59596800  | -0.17591800 |
| H    | -4.58026400 | 4.46636800  | 0.67848800  |
| H    | -3.63985200 | 2.97664300  | 0.89890900  |
| H    | -3.97651100 | 3.58912900  | -0.73075000 |
| 3c-2 |             |             |             |
| C    | 4.50612900  | -0.36037300 | 1.10517800  |
| C    | 3.80354100  | 0.71886200  | 1.90919200  |
| C    | 3.05732700  | 1.54666100  | 1.14490300  |
| C    | 3.10776200  | 1.11000600  | -0.34084800 |
| C    | 3.71139600  | -0.31803900 | -0.22511000 |
| C    | 6.05743200  | -0.16439800 | 1.07619400  |
| C    | 6.80119800  | -1.41741800 | 0.58415000  |
| C    | 6.52350400  | 1.10062800  | 0.33877200  |
| C    | 1.74934200  | 1.14967000  | -0.95114500 |
| C    | 3.99487200  | 0.79894300  | 3.39586000  |
| C    | 2.30568700  | 2.74446200  | 1.53679200  |
| C    | 2.70310600  | 3.66165800  | 2.43012200  |
| C    | 1.41639300  | 2.18894800  | -1.89782600 |
| C    | 2.30340500  | 2.80689600  | -2.71299800 |
| O    | 4.52753600  | -0.67438200 | -1.35567600 |
| C    | 3.90252200  | -0.81669200 | -2.54460000 |
| C    | 4.84231100  | -1.30096900 | -3.61698400 |
| O    | 2.71834700  | -0.57698600 | -2.70128700 |
| H    | 4.34052200  | -1.33935000 | 1.57761400  |
| H    | 3.81281000  | 1.76610600  | -0.87022600 |
| H    | 2.88357300  | -1.03124000 | -0.17474500 |
| H    | 6.33283700  | -0.03888600 | 2.13316300  |
| H    | 7.88101500  | -1.29365700 | 0.72391000  |
| H    | 6.49549000  | -2.30712200 | 1.14802300  |
| H    | 6.61867300  | -1.60859600 | -0.47648200 |
| H    | 7.59784700  | 1.25071800  | 0.49188000  |
| H    | 6.01079100  | 1.99741000  | 0.70518200  |
| H    | 6.35409700  | 1.02158700  | -0.74027700 |
| H    | 4.95468700  | 1.26220800  | 3.66026000  |
| H    | 3.20525100  | 1.38823100  | 3.87023700  |
| H    | 3.99945400  | -0.20575200 | 3.83651700  |
| H    | 1.35114500  | 2.89791400  | 1.03215600  |
| H    | 2.07769200  | 4.51669500  | 2.67036800  |
| H    | 3.66413400  | 3.60725700  | 2.93285500  |
| H    | 0.35948500  | 2.41491000  | -2.02199100 |



|    |             |             |             |
|----|-------------|-------------|-------------|
| H  | 1.96659500  | 3.51506700  | -3.46534700 |
| H  | 3.36621200  | 2.58715400  | -2.70303700 |
| H  | 5.73443900  | -0.66840900 | -3.65896100 |
| H  | 4.33222200  | -1.29762100 | -4.58062400 |
| H  | 5.17519300  | -2.31805100 | -3.38234300 |
| H  | -0.65025500 | -3.67042700 | -4.35665400 |
| C  | -1.40213900 | -3.66008300 | -3.55980100 |
| C  | -0.92505400 | -2.76714000 | -2.40414800 |
| C  | -1.70360000 | -5.10204600 | -3.08223100 |
| H  | -2.30418600 | -3.21200000 | -3.99818600 |
| C  | -2.06824900 | -2.58053700 | -1.37290800 |
| H  | -0.03810000 | -3.21574600 | -1.94309900 |
| H  | -0.60446300 | -1.78905500 | -2.77985400 |
| C  | -2.09132400 | -5.15099800 | -1.58804900 |
| H  | -0.83083700 | -5.74456900 | -3.24818100 |
| H  | -2.51339700 | -5.52323700 | -3.68945600 |
| P  | -1.49182700 | -1.67602200 | 0.18853800  |
| C  | -2.87642200 | -3.90095900 | -1.16290300 |
| H  | -2.75791000 | -1.84671200 | -1.80031300 |
| H  | -1.18933800 | -5.24285200 | -0.96986500 |
| H  | -2.68891600 | -6.04619100 | -1.38145000 |
| Au | 0.23561500  | -0.09537700 | -0.36239900 |
| C  | -3.04766100 | -0.98199600 | 0.92138400  |
| C  | -0.86291000 | -2.99224700 | 1.38373600  |
| H  | -3.22530300 | -4.00995100 | -0.13256900 |
| H  | -3.78868500 | -3.83702100 | -1.76928800 |
| C  | -3.46883100 | 0.37500100  | 0.84455000  |
| C  | -3.87970600 | -1.91249900 | 1.57787100  |
| C  | -0.74544200 | -2.50043700 | 2.84223000  |
| C  | 0.49574000  | -3.57095000 | 0.92194500  |
| H  | -1.59830800 | -3.80783100 | 1.35568000  |
| C  | -2.74824300 | 1.55882500  | 0.22908000  |
| C  | -4.71359900 | 0.70230100  | 1.41658300  |
| C  | -5.10142500 | -1.55568200 | 2.14066400  |
| H  | -3.56489800 | -2.94599800 | 1.66697700  |
| C  | -0.28842600 | -3.63611100 | 3.77406500  |
| H  | -0.01567600 | -1.68135300 | 2.88739000  |
| H  | -1.69776300 | -2.09436100 | 3.19436700  |
| C  | 0.96445300  | -4.70285600 | 1.85397100  |
| H  | 0.43707400  | -3.94642100 | -0.10333400 |
| H  | 1.24235400  | -2.76389800 | 0.91901800  |
| C  | -2.01757800 | 2.44721100  | 1.07975300  |
| C  | -2.98469400 | 1.94843400  | -1.12022400 |
| C  | -5.52486700 | -0.23228700 | 2.05375300  |

|   |             |             |             |
|---|-------------|-------------|-------------|
| H | -5.04898700 | 1.73223400  | 1.34484600  |
| H | -5.70930100 | -2.30501900 | 2.63878800  |
| C | 1.04326900  | -4.24516100 | 3.31610300  |
| H | -0.20354000 | -3.25293400 | 4.79801800  |
| H | -1.06023500 | -4.41918200 | 3.79769000  |
| H | 1.93941400  | -5.07243700 | 1.51307000  |
| H | 0.26658700  | -5.54861000 | 1.77164100  |
| C | -1.51566900 | 3.64477900  | 0.54754500  |
| C | -1.78925900 | 2.32005900  | 2.59975100  |
| C | -2.45577600 | 3.16937700  | -1.57514500 |
| C | -3.78652100 | 1.21983100  | -2.22096800 |
| H | -6.47646100 | 0.07449400  | 2.47812500  |
| H | 1.83958500  | -3.49301000 | 3.41888900  |
| H | 1.32207200  | -5.08566700 | 3.96246800  |
| C | -1.72723300 | 4.04219800  | -0.77258400 |
| H | -0.98087800 | 4.31121100  | 1.21933800  |
| H | -0.94234700 | 2.98929300  | 2.79726700  |
| C | -2.97168300 | 2.89288400  | 3.41257300  |
| C | -1.35726900 | 0.95799300  | 3.15421100  |
| H | -2.66569700 | 3.46574800  | -2.60167400 |
| C | -4.90791500 | 0.24161500  | -1.83846800 |
| C | -2.81728200 | 0.59322000  | -3.24927400 |
| H | -4.30037900 | 2.03043600  | -2.75459400 |
| C | -1.29130400 | 5.40134700  | -1.30770900 |
| H | -2.68951900 | 2.98028100  | 4.46848500  |
| H | -3.25610200 | 3.88846200  | 3.05537900  |
| H | -3.85152100 | 2.24553600  | 3.35802300  |
| H | -0.99886000 | 1.08562500  | 4.18270200  |
| H | -0.53495000 | 0.53706700  | 2.56569500  |
| H | -2.17382900 | 0.23441300  | 3.18107400  |
| H | -5.44856300 | -0.03647100 | -2.75062300 |
| H | -5.62829700 | 0.69789300  | -1.15446400 |
| H | -4.55148300 | -0.68083900 | -1.37463800 |
| H | -2.18986900 | 1.35807300  | -3.71897900 |
| H | -2.14294400 | -0.12810100 | -2.77871500 |
| H | -3.37162600 | 0.08010500  | -4.04389000 |
| C | -2.35900800 | 6.46913000  | -0.98631100 |
| C | 0.09168400  | 5.85508400  | -0.81178700 |
| H | -1.23934400 | 5.31301100  | -2.40224300 |
| H | -3.33830000 | 6.18526700  | -1.38585000 |
| H | -2.46407600 | 6.60137200  | 0.09705600  |
| H | -2.08075800 | 7.43654100  | -1.41998100 |
| H | 0.38322100  | 6.78598800  | -1.31030300 |
| H | 0.86482100  | 5.10507200  | -1.01424400 |

|                     |             |             |             |
|---------------------|-------------|-------------|-------------|
| H                   | 0.09143900  | 6.05436800  | 0.26608000  |
| Ts <sub>3c</sub> -2 |             |             |             |
| C                   | 4.46866100  | -0.77891400 | 0.89346600  |
| C                   | 5.20648600  | 0.04321100  | -0.15073700 |
| C                   | 4.42471400  | 0.37430900  | -1.21384300 |
| C                   | 3.04539600  | -0.15839800 | -0.97622600 |
| C                   | 3.15872400  | -1.17831300 | 0.17677500  |
| C                   | 5.30688100  | -1.85815500 | 1.63401900  |
| C                   | 4.51057200  | -2.50056400 | 2.78176900  |
| C                   | 5.97577700  | -2.91779100 | 0.74079800  |
| C                   | 1.77258800  | 0.31694000  | -1.41195900 |
| C                   | 6.59088400  | 0.54485000  | 0.12093600  |
| C                   | 4.83318500  | 1.19872100  | -2.36459400 |
| C                   | 5.92854900  | 0.96585500  | -3.09793400 |
| C                   | 1.63094700  | 1.27101000  | -2.52271500 |
| C                   | 1.88735100  | 1.06848000  | -3.82106400 |
| O                   | 3.24019900  | -2.47774300 | -0.45605200 |
| C                   | 2.36297700  | -3.44542600 | -0.06232600 |
| C                   | 2.59504500  | -4.71875200 | -0.83464400 |
| O                   | 1.53265900  | -3.28476900 | 0.80529000  |
| H                   | 4.16215900  | -0.07047200 | 1.68239900  |
| H                   | 2.57414500  | -0.79601600 | -1.91413100 |
| H                   | 2.28783700  | -1.17057300 | 0.83005400  |
| H                   | 6.12033200  | -1.28627900 | 2.10179600  |
| H                   | 5.15080800  | -3.18160900 | 3.35283100  |
| H                   | 4.13131500  | -1.74196200 | 3.47710200  |
| H                   | 3.65226800  | -3.07712900 | 2.42096900  |
| H                   | 6.74159100  | -3.45095600 | 1.31482000  |
| H                   | 6.46548500  | -2.47440300 | -0.13310500 |
| H                   | 5.26276000  | -3.65868800 | 0.37314600  |
| H                   | 7.32802900  | -0.26579700 | 0.06557700  |
| H                   | 6.88837100  | 1.32040100  | -0.58708200 |
| H                   | 6.65290000  | 0.95019700  | 1.13936800  |
| H                   | 4.19636700  | 2.03852800  | -2.62425800 |
| H                   | 6.20187800  | 1.61842800  | -3.92189400 |
| H                   | 6.57819400  | 0.11452100  | -2.91216100 |
| H                   | 1.14246100  | 2.19257000  | -2.19899300 |
| H                   | 1.66187200  | 1.83156100  | -4.55893900 |
| H                   | 2.30422800  | 0.13618300  | -4.19447200 |
| H                   | 2.68651000  | -4.51472100 | -1.90524900 |
| H                   | 1.77568400  | -5.41336400 | -0.64736400 |
| H                   | 3.53499500  | -5.17841700 | -0.50818200 |
| H                   | -3.62399100 | -1.25516700 | -4.83574500 |
| C                   | -3.75626700 | -0.59323200 | -3.97167400 |

|    |             |             |             |
|----|-------------|-------------|-------------|
| C  | -2.89677300 | -1.13744500 | -2.80135700 |
| C  | -5.25702300 | -0.49201600 | -3.60912600 |
| H  | -3.38429200 | 0.39171200  | -4.27737600 |
| C  | -3.49448600 | -0.69637900 | -1.44696400 |
| H  | -2.86240900 | -2.23130700 | -2.84810600 |
| H  | -1.86135300 | -0.79303800 | -2.90674800 |
| C  | -5.63767400 | -1.55656800 | -2.57450600 |
| H  | -5.87003400 | -0.59501200 | -4.51107400 |
| H  | -5.48156200 | 0.50274500  | -3.20063000 |
| P  | -2.30615000 | -0.83235200 | 0.02008400  |
| C  | -4.89121100 | -1.34047000 | -1.23257100 |
| H  | -3.63825500 | 0.38750900  | -1.50702400 |
| H  | -5.39459800 | -2.54866400 | -2.97681400 |
| H  | -6.71780300 | -1.55689800 | -2.39093100 |
| Au | -0.08187700 | -0.26519600 | -0.65429300 |
| C  | -3.04030300 | 0.29582100  | 1.29727400  |
| C  | -2.45340900 | -2.58239700 | 0.69218400  |
| H  | -4.80588900 | -2.30626100 | -0.72363300 |
| H  | -5.48383700 | -0.69222000 | -0.57775300 |
| C  | -2.56626300 | 1.59349000  | 1.63811300  |
| C  | -4.19305300 | -0.19529400 | 1.94456100  |
| C  | -1.74932400 | -2.77471200 | 2.05109200  |
| C  | -1.94239700 | -3.62047500 | -0.33281000 |
| H  | -3.52591800 | -2.76431400 | 0.83966400  |
| C  | -1.35529000 | 2.32809500  | 1.09788400  |
| C  | -3.29162800 | 2.31889300  | 2.60277400  |
| C  | -4.88259800 | 0.54323500  | 2.90187300  |
| H  | -4.56773600 | -1.18296100 | 1.70061300  |
| C  | -1.95016200 | -4.20863500 | 2.57339100  |
| H  | -0.67654500 | -2.58470700 | 1.93215700  |
| H  | -2.13184700 | -2.05876600 | 2.78479500  |
| C  | -2.12579200 | -5.05485200 | 0.19846300  |
| H  | -2.46828400 | -3.51953700 | -1.28744200 |
| H  | -0.87842000 | -3.43501000 | -0.52770400 |
| C  | -0.14388300 | 2.33166800  | 1.85995100  |
| C  | -1.46178800 | 3.20907000  | -0.01572600 |
| C  | -4.42698700 | 1.81672500  | 3.23221100  |
| H  | -2.94669700 | 3.31761900  | 2.85136000  |
| H  | -5.76427000 | 0.12509100  | 3.37831800  |
| C  | -1.45347000 | -5.25149100 | 1.56371500  |
| H  | -1.42464900 | -4.32051300 | 3.52934800  |
| H  | -3.01740500 | -4.37533600 | 2.78215600  |
| H  | -1.72465900 | -5.76496600 | -0.53558500 |
| H  | -3.20056800 | -5.27248500 | 0.28343600  |

|      |             |             |             |
|------|-------------|-------------|-------------|
| C    | 0.91891200  | 3.14926800  | 1.44948600  |
| C    | 0.12514600  | 1.61917900  | 3.20125800  |
| C    | -0.35755700 | 4.01393800  | -0.35063300 |
| C    | -2.66291600 | 3.45725700  | -0.95496400 |
| H    | -4.94947700 | 2.41832500  | 3.97035700  |
| H    | -0.36614100 | -5.14870500 | 1.45181900  |
| H    | -1.64592200 | -6.26478700 | 1.93635700  |
| C    | 0.84030700  | 4.01253700  | 0.35611700  |
| H    | 1.82373300  | 3.14440500  | 2.05263300  |
| H    | 1.22041800  | 1.59599000  | 3.27311900  |
| C    | -0.35073000 | 2.46472000  | 4.40377800  |
| C    | -0.31996500 | 0.16058000  | 3.35418700  |
| H    | -0.46477500 | 4.70573500  | -1.18462800 |
| C    | -4.09411000 | 3.17528100  | -0.47176900 |
| C    | -2.39539500 | 2.80793700  | -2.33197400 |
| H    | -2.64144300 | 4.54123400  | -1.12991700 |
| C    | 1.95654500  | 4.98806600  | 0.00439000  |
| H    | 0.03789200  | 2.03820900  | 5.33610600  |
| H    | 0.00408300  | 3.49827800  | 4.33017900  |
| H    | -1.44171400 | 2.48193400  | 4.47814200  |
| H    | 0.15713700  | -0.27020300 | 4.24268000  |
| H    | -0.01788800 | -0.44127300 | 2.49092500  |
| H    | -1.39902900 | 0.06041200  | 3.48480000  |
| H    | -4.79311300 | 3.56314100  | -1.22202000 |
| H    | -4.31104700 | 3.68090000  | 0.47276000  |
| H    | -4.31434100 | 2.11398400  | -0.33633500 |
| H    | -1.49800700 | 3.22721900  | -2.79892200 |
| H    | -2.23653300 | 1.72897200  | -2.24431400 |
| H    | -3.23762100 | 2.97982400  | -3.01253300 |
| C    | 1.95822100  | 6.18417700  | 0.97902600  |
| C    | 3.34607300  | 4.33089200  | -0.05125200 |
| H    | 1.73638300  | 5.38212500  | -0.99740100 |
| H    | 0.98625400  | 6.68849000  | 0.98887700  |
| H    | 2.17655200  | 5.85663100  | 2.00246900  |
| H    | 2.72006500  | 6.91703100  | 0.68962400  |
| H    | 4.09794900  | 5.05807200  | -0.37730200 |
| H    | 3.36632400  | 3.48793700  | -0.75155500 |
| H    | 3.65783600  | 3.95887800  | 0.93175100  |
| 4c-2 |             |             |             |
| C    | -4.06769200 | -0.39862400 | 1.14588800  |
| C    | -3.73825300 | -1.82556200 | 0.74517800  |
| C    | -2.99963200 | -1.87090700 | -0.39694300 |
| C    | -2.64637800 | -0.51478200 | -0.84229300 |
| C    | -3.04058000 | 0.41142100  | 0.29574800  |

|   |             |             |             |
|---|-------------|-------------|-------------|
| C | -5.59203600 | -0.09116200 | 0.97502900  |
| C | -6.02939400 | 1.20071900  | 1.68460500  |
| C | -6.08192000 | -0.12669500 | -0.48041100 |
| C | -2.02988800 | -0.22002000 | -2.01114900 |
| C | -4.20505500 | -2.97812000 | 1.57901900  |
| C | -2.50861100 | -3.06637100 | -1.09627800 |
| C | -3.19611100 | -4.19363300 | -1.31901100 |
| C | -1.57220200 | 1.07404400  | -2.48140200 |
| C | -0.96008900 | 1.25850800  | -3.66365900 |
| O | -3.51650200 | 1.69089300  | -0.17537300 |
| C | -3.12576500 | 2.79359300  | 0.51803900  |
| C | -3.67142400 | 4.04481700  | -0.12967900 |
| O | -2.43829700 | 2.76402900  | 1.51384300  |
| H | -3.84694700 | -0.25135800 | 2.21275500  |
| H | -1.84248400 | -1.04983900 | -2.69251000 |
| H | -2.16743200 | 0.61089800  | 0.92465600  |
| H | -6.09397700 | -0.91321400 | 1.50689400  |
| H | -7.12364300 | 1.25177500  | 1.73544000  |
| H | -5.64454900 | 1.24716100  | 2.71023800  |
| H | -5.68668100 | 2.09327500  | 1.15430800  |
| H | -7.17248300 | -0.01555400 | -0.51383600 |
| H | -5.82730000 | -1.07272200 | -0.96955000 |
| H | -5.64175900 | 0.68424100  | -1.06838300 |
| H | -5.27088300 | -3.19612000 | 1.42025400  |
| H | -3.64796800 | -3.89122600 | 1.35062600  |
| H | -4.09058400 | -2.75132400 | 2.64729500  |
| H | -1.48771200 | -2.99926100 | -1.47407700 |
| H | -2.74279200 | -5.03532000 | -1.83537300 |
| H | -4.23296100 | -4.30988400 | -1.01621000 |
| H | -1.72610200 | 1.93066000  | -1.83223100 |
| H | -0.61690200 | 2.23802200  | -3.98251100 |
| H | -0.78331800 | 0.43238000  | -4.34927200 |
| H | -3.41215100 | 4.07009600  | -1.19268300 |
| H | -3.26727000 | 4.92095300  | 0.37849800  |
| H | -4.76485500 | 4.05523700  | -0.06215600 |

### S1-3 Cartesian coordinates of some key stationary points in Figure 5

|     |             |            |             |
|-----|-------------|------------|-------------|
| 1-3 |             |            |             |
| C   | -2.06688100 | 2.47013400 | 2.12243300  |
| C   | -2.92458900 | 3.23072600 | 1.11614900  |
| C   | -0.67353100 | 1.29744500 | -0.79115200 |
| C   | -2.43153400 | 4.19071500 | 0.30159100  |
| C   | -0.47351000 | 1.53336600 | 0.40584700  |

|    |             |             |             |
|----|-------------|-------------|-------------|
| C  | -0.59058600 | 2.19325500  | 1.73612800  |
| C  | -2.22582200 | 3.02639400  | 3.58505200  |
| C  | -1.55612500 | 2.12036000  | 4.63143400  |
| C  | -1.82039500 | 4.49471500  | 3.78240000  |
| C  | -3.17617400 | 4.96194000  | -0.68621600 |
| C  | -2.60974200 | 5.88752200  | -1.47672800 |
| C  | -0.93933300 | 1.10806100  | -2.18064800 |
| C  | -2.08733600 | 0.58760400  | -2.64254700 |
| O  | 0.19527000  | 3.40757900  | 1.72432700  |
| C  | 1.50930700  | 3.28899700  | 2.06507400  |
| C  | 2.18761000  | 4.63345900  | 2.06753000  |
| O  | 2.03139400  | 2.22590800  | 2.32500100  |
| H  | -2.48480300 | 1.45197600  | 2.17171700  |
| H  | -1.37411700 | 4.43529500  | 0.36546100  |
| H  | -0.15939300 | 1.53817600  | 2.49369900  |
| H  | -3.30726600 | 2.97204700  | 3.76831800  |
| H  | -1.86310000 | 2.41848900  | 5.63966500  |
| H  | -1.83611100 | 1.06719800  | 4.49995400  |
| H  | -0.46154600 | 2.18953100  | 4.59895000  |
| H  | -2.17481400 | 4.84530000  | 4.75823200  |
| H  | -2.25633700 | 5.13973300  | 3.01432100  |
| H  | -0.73455300 | 4.62657400  | 3.76017900  |
| H  | -4.24335900 | 4.77535800  | -0.78624700 |
| H  | -3.18810600 | 6.45152200  | -2.20187200 |
| H  | -1.54705000 | 6.11379100  | -1.41796700 |
| H  | -0.15893800 | 1.43544800  | -2.86261000 |
| H  | -2.26037200 | 0.49827700  | -3.71032300 |
| H  | -2.87763300 | 0.25603900  | -1.97709100 |
| H  | 2.22844200  | 5.02811300  | 1.04632300  |
| H  | 3.19931500  | 4.53019400  | 2.46085100  |
| H  | 1.61953100  | 5.34804300  | 2.67084900  |
| Au | 1.04989200  | -0.19491500 | 0.13934800  |
| H  | 4.68081000  | 4.54456200  | -3.83295800 |
| C  | 3.60657500  | 4.74117200  | -3.75237100 |
| C  | 3.05149400  | 4.26011100  | -2.39694500 |
| H  | 3.10908700  | 4.23354400  | -4.58735100 |
| H  | 3.44677300  | 5.81860200  | -3.87377000 |
| C  | 3.33478500  | 2.78066700  | -2.17409300 |
| C  | 1.55506700  | 4.60028800  | -2.26496400 |
| H  | 3.58608700  | 4.81016500  | -1.61001300 |
| C  | 2.73591300  | 1.78573200  | -2.94943000 |
| C  | 4.26589900  | 2.36222900  | -1.23235800 |
| H  | 1.40047300  | 5.68219600  | -2.34876300 |
| H  | 1.14953700  | 4.27004000  | -1.30120200 |

|   |            |             |             |
|---|------------|-------------|-------------|
| H | 0.96319000 | 4.12592200  | -3.05697400 |
| C | 3.02107000 | 0.42259900  | -2.79757200 |
| H | 2.05938400 | 2.07940700  | -3.74972800 |
| C | 4.59737900 | 1.01358800  | -1.00610400 |
| H | 4.79548000 | 3.12083000  | -0.65996300 |
| C | 2.39941200 | -0.45771200 | -3.90301400 |
| C | 3.92824100 | 0.01606600  | -1.76729700 |
| C | 5.73488700 | 0.86281100  | 0.03317600  |
| H | 1.54175300 | 0.12838900  | -4.25867100 |
| C | 3.34648000 | -0.57982800 | -5.11818200 |
| C | 1.82006900 | -1.82938500 | -3.53199200 |
| C | 4.29082600 | -1.44737100 | -1.66010800 |
| C | 6.54517400 | -0.44035000 | 0.11146900  |
| C | 5.25957000 | 1.28932100  | 1.43981900  |
| H | 6.46443800 | 1.62478400  | -0.27572300 |
| H | 2.81364300 | -1.03037300 | -5.96388600 |
| H | 3.71746300 | 0.40064900  | -5.43433100 |
| H | 4.20884800 | -1.21530500 | -4.89584700 |
| H | 1.20286000 | -2.19115200 | -4.36315400 |
| H | 1.17970600 | -1.76565100 | -2.64735300 |
| H | 2.58973500 | -2.58166400 | -3.34849800 |
| C | 5.30597000 | -1.87834900 | -2.53360400 |
| C | 3.69686600 | -2.41924100 | -0.80902600 |
| H | 7.36694400 | -0.29087600 | 0.82121100  |
| H | 6.98807100 | -0.70936600 | -0.85036500 |
| H | 5.96462500 | -1.29853400 | 0.46085100  |
| H | 4.85580500 | 2.30507100  | 1.44361300  |
| H | 4.46391200 | 0.64252500  | 1.81686700  |
| H | 6.09551200 | 1.25502300  | 2.14808300  |
| C | 5.73326900 | -3.20130400 | -2.60069200 |
| H | 5.77281800 | -1.13581600 | -3.17302100 |
| C | 4.13804500 | -3.75625200 | -0.89363600 |
| P | 2.40008100 | -2.08836500 | 0.47168400  |
| C | 5.14000500 | -4.15278900 | -1.77473200 |
| H | 6.52091400 | -3.48355300 | -3.29322700 |
| H | 3.68509200 | -4.51710200 | -0.26861800 |
| C | 1.28393400 | -3.60243500 | 0.53904900  |
| C | 3.34614000 | -1.96733400 | 2.09452900  |
| H | 5.44863500 | -5.19317600 | -1.81105600 |
| C | 0.70750000 | -3.98626800 | -0.84077300 |
| C | 0.12995500 | -3.42713000 | 1.55419200  |
| H | 1.91725900 | -4.42641200 | 0.89546700  |
| C | 3.96619000 | -3.30170600 | 2.62112700  |
| C | 2.56930900 | -1.20657600 | 3.19975500  |



|   |              |             |             |
|---|--------------|-------------|-------------|
| H | 4.17684000   | -1.32133600 | 1.79671400  |
| C | -0.14424500  | -5.26445900 | -0.75078800 |
| H | 0.08038600   | -3.15993900 | -1.20335700 |
| H | 1.50657900   | -4.12246400 | -1.57483200 |
| C | -0.72852300  | -4.70221500 | 1.64361200  |
| H | 0.51313200   | -3.18029700 | 2.54788900  |
| H | -0.49945800  | -2.58285900 | 1.23782700  |
| C | 3.27259600   | -3.81586800 | 3.89176500  |
| H | 3.97692100   | -4.08245400 | 1.85511000  |
| H | 5.02181800   | -3.10944400 | 2.84974600  |
| C | 3.31848000   | -1.33054600 | 4.53578400  |
| H | 1.55312900   | -1.60051800 | 3.31737100  |
| H | 2.46455200   | -0.15491800 | 2.91452400  |
| C | -1.27705500  | -5.12145400 | 0.27381300  |
| H | -0.54965300  | -5.49834600 | -1.74239000 |
| H | 0.49990700   | -6.11055100 | -0.47081300 |
| H | -1.54884000  | -4.53414300 | 2.35175000  |
| H | -0.12012500  | -5.51759600 | 2.06078900  |
| C | 3.35360900   | -2.79152400 | 5.04552500  |
| H | 2.22308600   | -4.04544600 | 3.66775300  |
| H | 3.72771600   | -4.76536300 | 4.19559700  |
| H | 2.85484800   | -0.67644000 | 5.28240800  |
| H | 4.34103300   | -0.95443900 | 4.39733500  |
| H | -1.99231500  | -4.36392000 | -0.07910500 |
| H | -1.83458600  | -6.06130700 | 0.36003300  |
| H | 2.52399000   | -2.96824400 | 5.74014600  |
| H | 4.27305400   | -2.95231000 | 5.62044300  |
| H | -13.27712800 | -2.96727800 | -0.26596200 |
| C | -12.27201500 | -2.62821500 | -0.50130600 |
| C | -11.42075100 | -2.19325600 | 0.51730300  |
| C | -11.82702500 | -2.61795000 | -1.82435100 |
| C | -10.12954600 | -1.75831700 | 0.21716900  |
| H | -11.76361200 | -2.19220000 | 1.54869200  |
| C | -10.53824700 | -2.17326200 | -2.12446300 |
| H | -12.48532600 | -2.94572100 | -2.62439500 |
| C | -9.67725100  | -1.74543800 | -1.10780300 |
| H | -9.46927400  | -1.41074700 | 1.00530900  |
| H | -10.20132300 | -2.15566400 | -3.15900400 |
| C | -8.26427800  | -1.32434800 | -1.43941400 |
| O | -7.84127700  | -0.29693300 | -0.55774600 |
| H | -7.57880900  | -2.18768500 | -1.35062500 |
| H | -8.20553600  | -0.98030000 | -2.48570800 |
| C | -6.49508300  | 0.08059900  | -0.74636900 |
| C | -6.16441700  | 1.19774400  | 0.23766200  |

|        |             |             |             |
|--------|-------------|-------------|-------------|
| H      | -5.82649700 | -0.78615800 | -0.58555000 |
| H      | -6.33259600 | 0.42367300  | -1.78432000 |
| C      | -4.70604100 | 1.66277100  | 0.14513300  |
| H      | -6.84167700 | 2.04019500  | 0.04877800  |
| H      | -6.38258000 | 0.84237100  | 1.25304600  |
| C      | -4.38776600 | 2.82038400  | 1.11568700  |
| H      | -4.47875000 | 1.99001900  | -0.87879300 |
| H      | -4.03631000 | 0.81476700  | 0.35622300  |
| H      | -4.68161000 | 2.51137300  | 2.12776900  |
| H      | -5.02832200 | 3.67379400  | 0.86995800  |
| Ts1a-3 |             |             |             |
| C      | -1.98924900 | 2.58361900  | 1.85873200  |
| C      | -2.51014500 | 3.06794200  | 0.51797100  |
| C      | -1.06438900 | 1.84649400  | -0.62386500 |
| C      | -1.75304300 | 3.98027300  | -0.20696400 |
| C      | -0.34426000 | 1.44400100  | 0.38598100  |
| C      | -0.51898500 | 2.11060800  | 1.74328900  |
| C      | -2.35296600 | 3.51713400  | 3.06158500  |
| C      | -1.86985400 | 2.90304400  | 4.38695000  |
| C      | -1.91625100 | 4.98530000  | 2.93898800  |
| C      | -2.17096400 | 4.68996500  | -1.40539900 |
| C      | -1.43053700 | 5.67620000  | -1.94129600 |
| C      | -1.44431500 | 1.65606700  | -1.99916800 |
| C      | -2.01627400 | 0.52537200  | -2.44554200 |
| O      | 0.42853200  | 3.20209800  | 1.85369800  |
| C      | 1.60027200  | 2.93808100  | 2.50883600  |
| C      | 2.50255600  | 4.14493900  | 2.51464300  |
| O      | 1.86133300  | 1.86278700  | 2.99823300  |
| H      | -2.51574300 | 1.64672800  | 2.07106200  |
| H      | -0.80382000 | 4.29658800  | 0.21469300  |
| H      | -0.29484300 | 1.41401900  | 2.55007100  |
| H      | -3.45254100 | 3.51552400  | 3.09189000  |
| H      | -2.26652400 | 3.47434500  | 5.23278300  |
| H      | -2.20702700 | 1.86560900  | 4.50111800  |
| H      | -0.77713900 | 2.91370900  | 4.46827200  |
| H      | -2.29007700 | 5.54843300  | 3.80119100  |
| H      | -2.31973700 | 5.46356500  | 2.03985100  |
| H      | -0.82802900 | 5.08784200  | 2.91926400  |
| H      | -3.12943700 | 4.44411800  | -1.85318000 |
| H      | -1.77049700 | 6.23269100  | -2.80929000 |
| H      | -0.47196200 | 5.96536700  | -1.51848200 |
| H      | -1.24638300 | 2.47438900  | -2.68823500 |
| H      | -2.25009500 | 0.39712500  | -3.49844000 |
| H      | -2.23847700 | -0.30405700 | -1.78062200 |

|    |            |             |             |
|----|------------|-------------|-------------|
| H  | 3.04128200 | 4.18575200  | 1.56079000  |
| H  | 3.22950700 | 4.04703200  | 3.32234300  |
| H  | 1.93437500 | 5.07222300  | 2.62213800  |
| Au | 0.93988800 | -0.20427000 | 0.21048500  |
| H  | 5.47115800 | 4.62148600  | -2.98561900 |
| C  | 4.43268200 | 4.96575300  | -2.94100100 |
| C  | 3.72407800 | 4.43192500  | -1.68015100 |
| H  | 3.92736500 | 4.62387300  | -3.85203100 |
| H  | 4.43622300 | 6.06197500  | -2.94964300 |
| C  | 3.78357300 | 2.91200300  | -1.61409900 |
| C  | 2.28428600 | 4.96930200  | -1.59199700 |
| H  | 4.27394400 | 4.81514100  | -0.80910400 |
| C  | 3.08030600 | 2.10345000  | -2.50780900 |
| C  | 4.60977100 | 2.26729500  | -0.70291500 |
| H  | 2.28667200 | 6.06578900  | -1.56736800 |
| H  | 1.77829900 | 4.60289000  | -0.69087800 |
| H  | 1.69005700 | 4.65845900  | -2.45947400 |
| C  | 3.19016300 | 0.70744300  | -2.52302600 |
| H  | 2.45586200 | 2.57332600  | -3.26427700 |
| C  | 4.75316100 | 0.86945600  | -0.63421000 |
| H  | 5.20784400 | 2.87576000  | -0.02690000 |
| C  | 2.48743000 | 0.05636300  | -3.73291900 |
| C  | 4.00940700 | 0.06485000  | -1.54151300 |
| C  | 5.78237900 | 0.44929200  | 0.44228500  |
| H  | 1.73776500 | 0.79918400  | -4.03473500 |
| C  | 3.44623100 | -0.08218500 | -4.93655900 |
| C  | 1.69925800 | -1.24188200 | -3.52019500 |
| C  | 4.24320400 | -1.42682300 | -1.64459100 |
| C  | 6.45776100 | -0.92905300 | 0.37683600  |
| C  | 5.22069900 | 0.71964900  | 1.85709700  |
| H  | 6.60479100 | 1.16592400  | 0.30904800  |
| H  | 2.88071700 | -0.34999800 | -5.83714600 |
| H  | 3.97488800 | 0.85633600  | -5.13450000 |
| H  | 4.19136400 | -0.86539600 | -4.76973100 |
| H  | 1.07749300 | -1.43116400 | -4.40402600 |
| H  | 1.03371400 | -1.16171500 | -2.65487300 |
| H  | 2.34358400 | -2.11254000 | -3.38487800 |
| C  | 5.26760100 | -1.79654100 | -2.53654800 |
| C  | 3.54996200 | -2.46671000 | -0.96630900 |
| H  | 7.23475200 | -0.96734900 | 1.14925200  |
| H  | 6.94325300 | -1.10232600 | -0.58660000 |
| H  | 5.77551400 | -1.76317300 | 0.55855200  |
| H  | 4.95582500 | 1.77262100  | 1.99040800  |
| H  | 4.31299800 | 0.14391100  | 2.05501200  |

|   |              |             |             |
|---|--------------|-------------|-------------|
| H | 5.96516300   | 0.46214600  | 2.61963300  |
| C | 5.61642100   | -3.12179600 | -2.78004300 |
| H | 5.80900500   | -1.00377600 | -3.04343300 |
| C | 3.91792600   | -3.80302700 | -1.22624300 |
| P | 2.19738100   | -2.22279000 | 0.28171000  |
| C | 4.93301500   | -4.13804700 | -2.11780200 |
| H | 6.41514400   | -3.35443000 | -3.47845600 |
| H | 3.39385500   | -4.61252900 | -0.73196300 |
| C | 1.01878700   | -3.68016000 | 0.07570100  |
| C | 3.06404500   | -2.42794700 | 1.94704600  |
| H | 5.18125000   | -5.18125900 | -2.28928000 |
| C | 0.51195600   | -3.84596600 | -1.37292300 |
| C | -0.18793900  | -3.58202200 | 1.03927600  |
| H | 1.58574200   | -4.58041600 | 0.34909900  |
| C | 3.56387800   | -3.86658600 | 2.29660600  |
| C | 2.27912400   | -1.78529500 | 3.11963600  |
| H | 3.95199400   | -1.80892800 | 1.79333400  |
| C | -0.40204500  | -5.07618100 | -1.50691400 |
| H | -0.04926800  | -2.94558600 | -1.65714700 |
| H | 1.34806400   | -3.92886600 | -2.07311700 |
| C | -1.10756000  | -4.80926600 | 0.90590800  |
| H | 0.14386800   | -3.49044000 | 2.07692700  |
| H | -0.75630600  | -2.66973300 | 0.80886400  |
| C | 2.78712900   | -4.49668000 | 3.46228400  |
| H | 3.54101900   | -4.53235500 | 1.42917000  |
| H | 4.62268100   | -3.79734600 | 2.57644900  |
| C | 2.96049600   | -2.13483900 | 4.45222800  |
| H | 1.23997800   | -2.13359900 | 3.14303500  |
| H | 2.23515100   | -0.69983200 | 2.98529500  |
| C | -1.58887700  | -5.00989000 | -0.53659500 |
| H | -0.75545600  | -5.15532800 | -2.54213500 |
| H | 0.18264700   | -5.98591100 | -1.30734400 |
| H | -1.96202300  | -4.69601300 | 1.58439400  |
| H | -0.56409200  | -5.70551300 | 1.23837800  |
| C | 2.90124300   | -3.65328400 | 4.75077900  |
| H | 1.73235800   | -4.60605200 | 3.17985600  |
| H | 3.15662400   | -5.51301000 | 3.64127700  |
| H | 2.49703500   | -1.56627400 | 5.26610800  |
| H | 4.00562600   | -1.80013800 | 4.40608800  |
| H | -2.24262300  | -4.17188100 | -0.82110400 |
| H | -2.19598900  | -5.91974800 | -0.61232600 |
| H | 2.04772700   | -3.87706400 | 5.40177600  |
| H | 3.79722600   | -3.94928900 | 5.30934200  |
| H | -13.29290300 | -1.79373900 | -2.14803500 |

|      |              |             |             |
|------|--------------|-------------|-------------|
| C    | -12.32376600 | -1.72594200 | -1.66146100 |
| C    | -11.82235200 | -0.48332300 | -1.26517600 |
| C    | -11.57167500 | -2.87904200 | -1.43307200 |
| C    | -10.58001500 | -0.39486600 | -0.63749000 |
| H    | -12.40178700 | 0.41858900  | -1.44407800 |
| C    | -10.32359800 | -2.78766200 | -0.81328600 |
| H    | -11.95082700 | -3.84879800 | -1.74390900 |
| C    | -9.81955900  | -1.54801600 | -0.40572400 |
| H    | -10.18536500 | 0.57032600  | -0.33539800 |
| H    | -9.73697500  | -3.68877700 | -0.64673500 |
| C    | -8.49485100  | -1.46299300 | 0.31490100  |
| O    | -7.78266300  | -0.31165900 | -0.11759500 |
| H    | -8.65411600  | -1.40398800 | 1.40672500  |
| H    | -7.90021100  | -2.37279300 | 0.12868000  |
| C    | -6.56455700  | -0.11962500 | 0.56642800  |
| C    | -5.91488700  | 1.14966600  | 0.02356400  |
| H    | -6.73748200  | -0.03125100 | 1.65404500  |
| H    | -5.89575100  | -0.98720500 | 0.41752000  |
| C    | -4.54471800  | 1.43533700  | 0.65161600  |
| H    | -5.81715900  | 1.04755000  | -1.06495200 |
| H    | -6.59578100  | 1.99246800  | 0.19927900  |
| C    | -3.93255500  | 2.73419000  | 0.10285000  |
| H    | -3.86614800  | 0.59452200  | 0.45069500  |
| H    | -4.65350900  | 1.49766400  | 1.74217200  |
| H    | -4.57032900  | 3.58138400  | 0.40093500  |
| H    | -3.98608200  | 2.70040400  | -0.99124500 |
| 2a-3 |              |             |             |
| C    | -2.44291300  | 0.77532600  | 2.01747200  |
| C    | -2.95548100  | 0.85081100  | 0.57108900  |
| C    | -1.59863200  | 0.55181400  | -0.34798700 |
| C    | -2.49325600  | 1.99467900  | -0.18869200 |
| C    | -0.51139200  | 0.47258400  | 0.51967400  |
| C    | -0.90315300  | 0.93058400  | 1.92269900  |
| C    | -3.20539400  | 1.59434000  | 3.09646700  |
| C    | -2.57511300  | 1.37068500  | 4.48308800  |
| C    | -3.39246500  | 3.09170300  | 2.80210800  |
| C    | -3.11478300  | 2.47197800  | -1.43453300 |
| C    | -2.92859000  | 3.71883800  | -1.88736600 |
| C    | -1.64456100  | -0.07498500 | -1.69495500 |
| C    | -1.54628300  | -1.39335100 | -1.89251500 |
| O    | -0.42901200  | 2.28874200  | 2.09470400  |
| C    | 0.71964200   | 2.45112700  | 2.82820200  |
| C    | 1.09991500   | 3.90555400  | 2.92251500  |
| O    | 1.33200100   | 1.52887000  | 3.31321100  |

|    |             |             |             |
|----|-------------|-------------|-------------|
| H  | -2.57244600 | -0.27715700 | 2.30919600  |
| H  | -1.90532200 | 2.74135300  | 0.33328600  |
| H  | -0.40334400 | 0.31994000  | 2.67583300  |
| H  | -4.20933200 | 1.15120700  | 3.13830200  |
| H  | -3.20084300 | 1.82374400  | 5.25919000  |
| H  | -2.48061900 | 0.30332800  | 4.71627400  |
| H  | -1.57988000 | 1.82150200  | 4.56020300  |
| H  | -3.98400900 | 3.55011000  | 3.60231700  |
| H  | -3.93132700 | 3.26416100  | 1.86384400  |
| H  | -2.43629300 | 3.61985400  | 2.75091200  |
| H  | -3.78324200 | 1.79974500  | -1.96467900 |
| H  | -3.44348800 | 4.08002500  | -2.77237900 |
| H  | -2.27166300 | 4.42162500  | -1.38180700 |
| H  | -1.75107300 | 0.58669300  | -2.55181100 |
| H  | -1.55823500 | -1.81302100 | -2.89431600 |
| H  | -1.44970300 | -2.09419100 | -1.06727700 |
| H  | 1.66509100  | 4.17945000  | 2.02422800  |
| H  | 1.73877900  | 4.05282900  | 3.79476800  |
| H  | 0.21923000  | 4.54952900  | 2.97995600  |
| Au | 1.31121500  | -0.38100800 | 0.18802700  |
| H  | 3.72348200  | 6.18307500  | -2.17289500 |
| C  | 2.63071700  | 6.11501000  | -2.15921500 |
| C  | 2.14536000  | 5.19677300  | -1.01938500 |
| H  | 2.30673500  | 5.73589700  | -3.13575000 |
| H  | 2.22735100  | 7.12732900  | -2.04045300 |
| C  | 2.76773000  | 3.81092000  | -1.12770700 |
| C  | 0.60755000  | 5.15444200  | -0.96926500 |
| H  | 2.49584800  | 5.63547200  | -0.07454100 |
| C  | 2.41363600  | 2.91558600  | -2.13784400 |
| C  | 3.78192200  | 3.41312500  | -0.26575300 |
| H  | 0.20096100  | 6.16167600  | -0.82046100 |
| H  | 0.25338900  | 4.51625900  | -0.15068900 |
| H  | 0.19123600  | 4.76403000  | -1.90547900 |
| C  | 3.04148100  | 1.67572900  | -2.31422400 |
| H  | 1.65449500  | 3.20805200  | -2.85947100 |
| C  | 4.44324400  | 2.17451500  | -0.35823200 |
| H  | 4.11215400  | 4.11157800  | 0.50122300  |
| C  | 2.62624100  | 0.96556900  | -3.61966200 |
| C  | 4.05393400  | 1.27116300  | -1.38660000 |
| C  | 5.56441200  | 2.04192900  | 0.70095400  |
| H  | 1.65402400  | 1.41183500  | -3.86512700 |
| C  | 3.56158000  | 1.33702600  | -4.79226700 |
| C  | 2.37667600  | -0.54722200 | -3.58845200 |
| C  | 4.84695700  | 0.01293200  | -1.66787100 |

|   |            |             |             |
|---|------------|-------------|-------------|
| C | 6.71722600 | 1.04718500  | 0.49488700  |
| C | 4.95810500 | 1.89200600  | 2.11529800  |
| H | 6.04729200 | 3.02899600  | 0.69126900  |
| H | 3.12490400 | 0.99809300  | -5.73935900 |
| H | 3.71043800 | 2.42020700  | -4.85637100 |
| H | 4.54174200 | 0.86207500  | -4.69247400 |
| H | 1.86889800 | -0.84444000 | -4.51435700 |
| H | 1.72876700 | -0.82374400 | -2.75034500 |
| H | 3.29942500 | -1.12670100 | -3.52448900 |
| C | 5.92912700 | 0.19091400  | -2.55041000 |
| C | 4.61835400 | -1.29392300 | -1.15754900 |
| H | 7.45354500 | 1.20652500  | 1.29137800  |
| H | 7.22676400 | 1.20165500  | -0.45919500 |
| H | 6.40931600 | -0.00039600 | 0.53959200  |
| H | 4.29756600 | 2.72863900  | 2.36152600  |
| H | 4.36042200 | 0.98180700  | 2.21189400  |
| H | 5.75310900 | 1.86060600  | 2.86947600  |
| C | 6.76729900 | -0.85090700 | -2.93717800 |
| H | 6.11494400 | 1.19060200  | -2.93071600 |
| C | 5.47795300 | -2.33646700 | -1.56050500 |
| P | 3.28441100 | -1.74968000 | 0.04781000  |
| C | 6.53969700 | -2.13011500 | -2.43678900 |
| H | 7.58999000 | -0.66160300 | -3.62069700 |
| H | 5.31433200 | -3.34283900 | -1.19264800 |
| C | 2.75597600 | -3.50961200 | -0.38402700 |
| C | 4.17103700 | -1.82579000 | 1.71391000  |
| H | 7.17639000 | -2.96214500 | -2.72256100 |
| C | 2.36682300 | -3.68308800 | -1.86855300 |
| C | 1.59266500 | -3.99248400 | 0.51486500  |
| H | 3.62235400 | -4.15216500 | -0.17628000 |
| C | 5.17785300 | -3.00296500 | 1.91375500  |
| C | 3.19856900 | -1.68467600 | 2.91364200  |
| H | 4.75696800 | -0.90321200 | 1.67942500  |
| C | 2.00155700 | -5.14501800 | -2.17973200 |
| H | 1.50408400 | -3.04014200 | -2.08895800 |
| H | 3.17753800 | -3.35673200 | -2.52609900 |
| C | 1.21666400 | -5.45239600 | 0.20400700  |
| H | 1.84885200 | -3.90457300 | 1.57413200  |
| H | 0.72132700 | -3.34310000 | 0.34825600  |
| C | 4.69172400 | -4.02719100 | 2.95018600  |
| H | 5.41354700 | -3.50444900 | 0.97071100  |
| H | 6.12922000 | -2.57905200 | 2.25927200  |
| C | 3.95560400 | -1.92580900 | 4.22885100  |
| H | 2.36898800 | -2.39710400 | 2.83872800  |

|                     |              |             |             |
|---------------------|--------------|-------------|-------------|
| H                   | 2.74506800   | -0.68776400 | 2.90714200  |
| C                   | 0.87000900   | -5.65268700 | -1.27673600 |
| H                   | 1.71896300   | -5.23198100 | -3.23587000 |
| H                   | 2.89059700   | -5.77776400 | -2.04266500 |
| H                   | 0.37536800   | -5.75325500 | 0.84041100  |
| H                   | 2.05889500   | -6.10575700 | 0.47403100  |
| C                   | 4.47601500   | -3.38067800 | 4.33598400  |
| H                   | 3.75654000   | -4.48338800 | 2.60122400  |
| H                   | 5.41609100   | -4.84653800 | 3.02385600  |
| H                   | 3.30720000   | -1.68742000 | 5.07919000  |
| H                   | 4.79578700   | -1.22026800 | 4.28154800  |
| H                   | -0.05486900  | -5.10474100 | -1.51148300 |
| H                   | 0.66484600   | -6.71055100 | -1.47905500 |
| H                   | 3.77073100   | -3.99255300 | 4.91085000  |
| H                   | 5.41720500   | -3.38940900 | 4.89844300  |
| H                   | -8.18761600  | 0.90835600  | 1.32854100  |
| C                   | -8.07551000  | 0.63360100  | 0.26445300  |
| O                   | -9.09563600  | -0.25846000 | -0.12667600 |
| C                   | -6.73570800  | -0.05899800 | 0.03255800  |
| H                   | -8.13258000  | 1.57101000  | -0.31771700 |
| C                   | -10.40194400 | 0.27810900  | 0.02459000  |
| C                   | -5.53525800  | 0.79953600  | 0.45123600  |
| H                   | -6.73583100  | -1.00425500 | 0.59014000  |
| H                   | -6.66027900  | -0.32251700 | -1.03058000 |
| C                   | -11.42758700 | -0.71609400 | -0.46825800 |
| H                   | -10.47708100 | 1.22191600  | -0.54544200 |
| H                   | -10.59274500 | 0.52911500  | 1.08109300  |
| C                   | -4.20317500  | 0.06605700  | 0.18883600  |
| H                   | -5.62324700  | 1.05764800  | 1.51319300  |
| H                   | -5.54457200  | 1.74959400  | -0.09978600 |
| C                   | -12.67766000 | -0.80215800 | 0.15441900  |
| C                   | -11.16151100 | -1.53142400 | -1.57511300 |
| H                   | -4.15803300  | -0.21199900 | -0.86948500 |
| H                   | -4.19161100  | -0.88041700 | 0.74420900  |
| H                   | -12.89151700 | -0.18072300 | 1.02156000  |
| C                   | -13.65162300 | -1.68033100 | -0.32455800 |
| C                   | -12.13035600 | -2.41654800 | -2.04854600 |
| H                   | -10.18762700 | -1.47721300 | -2.05128900 |
| C                   | -13.37946300 | -2.49130000 | -1.42749700 |
| H                   | -14.61770200 | -1.73693200 | 0.16969000  |
| H                   | -11.91057700 | -3.04892800 | -2.90481900 |
| H                   | -14.13373900 | -3.17995200 | -1.79824100 |
| Ts <sub>2a</sub> -3 |              |             |             |
| C                   | -1.80750000  | 2.49902500  | 2.17920400  |



|    |             |            |             |
|----|-------------|------------|-------------|
| C  | -2.13059500 | 2.85612300 | 0.71350500  |
| C  | -0.82177900 | 2.44904600 | -0.16455000 |
| C  | -1.29760600 | 3.94250000 | 0.11075000  |
| C  | 0.11351200  | 1.86500500 | 0.78223400  |
| C  | -0.27961200 | 2.28144400 | 2.22609300  |
| C  | -2.48002200 | 3.37358600 | 3.27943200  |
| C  | -2.05631700 | 2.90125700 | 4.68693700  |
| C  | -2.30324400 | 4.89802400 | 3.13097600  |
| C  | -1.74801100 | 4.75895600 | -1.04299200 |
| C  | -1.36793300 | 6.03158100 | -1.22641700 |
| C  | -0.88620500 | 1.97372800 | -1.57873300 |
| C  | -1.47782900 | 0.84551100 | -1.99097500 |
| O  | 0.48709800  | 3.51084700 | 2.66314700  |
| C  | 1.54617300  | 3.80913700 | 1.87899900  |
| C  | 2.40453000  | 4.92902000 | 2.36131700  |
| O  | 1.74111300  | 3.14732200 | 0.82857800  |
| H  | -2.20233300 | 1.48479000 | 2.33815100  |
| H  | -0.66953800 | 4.50249800 | 0.79211600  |
| H  | 0.01253900  | 1.53881500 | 2.96608100  |
| H  | -3.55726900 | 3.16809100 | 3.17846800  |
| H  | -2.65493800 | 3.40568400 | 5.45260600  |
| H  | -2.20099700 | 1.82069300 | 4.81300700  |
| H  | -1.00364600 | 3.13512700 | 4.88186500  |
| H  | -2.89284500 | 5.40762200 | 3.90144400  |
| H  | -2.65230900 | 5.26118300 | 2.15885400  |
| H  | -1.25889300 | 5.19618000 | 3.26072600  |
| H  | -2.42214900 | 4.29609600 | -1.75829000 |
| H  | -1.72503200 | 6.61596500 | -2.06737600 |
| H  | -0.69338100 | 6.53802900 | -0.54064500 |
| H  | -0.39232700 | 2.61546800 | -2.30624800 |
| H  | -1.47122900 | 0.55381700 | -3.03622600 |
| H  | -1.98142500 | 0.16987300 | -1.30565700 |
| H  | 3.05390000  | 5.27313200 | 1.55679300  |
| H  | 3.02474600  | 4.57822600 | 3.19481100  |
| H  | 1.78887100  | 5.75103600 | 2.73480100  |
| Au | 1.08954800  | 0.07390200 | 0.50588200  |
| H  | 5.41988300  | 3.76108800 | -4.22172900 |
| C  | 4.43004300  | 4.21762200 | -4.11457200 |
| C  | 3.83814000  | 3.94682700 | -2.71023500 |
| H  | 3.78229500  | 3.80601800 | -4.89812400 |
| H  | 4.52873600  | 5.29518500 | -4.29043400 |
| C  | 3.76813600  | 2.44990200 | -2.42206100 |
| C  | 2.47264200  | 4.64899300 | -2.54636400 |
| H  | 4.52630600  | 4.38416900 | -1.97222500 |

|   |             |             |             |
|---|-------------|-------------|-------------|
| C | 2.87096600  | 1.60915700  | -3.08642700 |
| C | 4.65225400  | 1.84897300  | -1.52961600 |
| H | 2.58085200  | 5.73080800  | -2.68833400 |
| H | 2.05411200  | 4.46619900  | -1.55128100 |
| H | 1.75019700  | 4.29280400  | -3.29098400 |
| C | 2.84388700  | 0.21777700  | -2.89701000 |
| H | 2.19038400  | 2.03547900  | -3.81791500 |
| C | 4.67057000  | 0.46433700  | -1.26891400 |
| H | 5.38452500  | 2.47480100  | -1.02492800 |
| C | 1.89742800  | -0.51359300 | -3.87586700 |
| C | 3.73467200  | -0.37538400 | -1.94297700 |
| C | 5.77385300  | 0.07661000  | -0.25376600 |
| H | 1.17619700  | 0.26022200  | -4.17425600 |
| C | 2.62651800  | -0.93231700 | -5.17922600 |
| C | 1.04891300  | -1.67535400 | -3.33301200 |
| C | 3.81906200  | -1.88540700 | -1.85913000 |
| C | 6.35102500  | -1.35144300 | -0.25177700 |
| C | 5.35176900  | 0.51132600  | 1.17440200  |
| H | 6.62279400  | 0.72198600  | -0.52366700 |
| H | 1.89409000  | -1.25277500 | -5.93012200 |
| H | 3.20010600  | -0.09829700 | -5.59740100 |
| H | 3.31090200  | -1.76761500 | -5.00474900 |
| H | 0.25321800  | -1.90813900 | -4.05185800 |
| H | 0.57672900  | -1.40401500 | -2.38399400 |
| H | 1.63254600  | -2.58611100 | -3.18645900 |
| C | 4.64563900  | -2.48609500 | -2.83558900 |
| C | 3.15626000  | -2.74701200 | -0.94392900 |
| H | 7.21284600  | -1.37715500 | 0.42601700  |
| H | 6.70142100  | -1.64791700 | -1.24390100 |
| H | 5.64087100  | -2.10893100 | 0.08829200  |
| H | 5.16690800  | 1.58971000  | 1.21557500  |
| H | 4.42760200  | 0.01333900  | 1.48156300  |
| H | 6.13694900  | 0.26954600  | 1.90079000  |
| C | 4.81661200  | -3.86662100 | -2.93511700 |
| H | 5.16719700  | -1.83341800 | -3.52678900 |
| C | 3.33038800  | -4.14221400 | -1.06128600 |
| P | 2.05533000  | -2.17868500 | 0.49677300  |
| C | 4.14746800  | -4.70584200 | -2.04238200 |
| H | 5.46263500  | -4.28002700 | -3.70228900 |
| H | 2.81108900  | -4.81009500 | -0.38517500 |
| C | 0.63466200  | -3.49042800 | 0.63753600  |
| C | 3.18679600  | -2.45016500 | 2.06328300  |
| H | 4.25597000  | -5.78324800 | -2.10438800 |
| C | -0.09218500 | -3.73571700 | -0.70203900 |

|   |              |             |             |
|---|--------------|-------------|-------------|
| C | -0.38940900  | -3.08887300 | 1.72694000  |
| H | 1.12215200   | -4.42335700 | 0.95014000  |
| C | 3.44958800   | -3.93350900 | 2.47477400  |
| C | 2.71142300   | -1.59563500 | 3.26603000  |
| H | 4.13497400   | -2.02938600 | 1.71570900  |
| C | -1.16947100  | -4.83127700 | -0.54734200 |
| H | -0.57195200  | -2.80263700 | -1.02745200 |
| H | 0.61650500   | -4.02022600 | -1.48511200 |
| C | -1.47498600  | -4.17687600 | 1.88735600  |
| H | 0.10229000   | -2.92132200 | 2.69024200  |
| H | -0.86008300  | -2.13714700 | 1.43958700  |
| C | 2.74353300   | -4.32210900 | 3.78851700  |
| H | 3.17638200   | -4.63557600 | 1.68195700  |
| H | 4.53256700   | -4.05769600 | 2.60982800  |
| C | 3.50902400   | -1.97986200 | 4.52910500  |
| H | 1.64065500   | -1.73790100 | 3.45579500  |
| H | 2.84530700   | -0.53233400 | 3.03374700  |
| C | -2.18559800  | -4.47679500 | 0.55459600  |
| H | -1.68083500  | -4.97766700 | -1.50667300 |
| H | -0.68277400  | -5.78710900 | -0.30201900 |
| H | -2.20104000  | -3.85838300 | 2.64610800  |
| H | -1.00854300  | -5.09780700 | 2.26776600  |
| C | 3.21021300   | -3.43856200 | 4.97238000  |
| H | 1.65669000   | -4.23181600 | 3.66125100  |
| H | 2.93616300   | -5.37850900 | 4.00991000  |
| H | 3.28120600   | -1.28155500 | 5.34313100  |
| H | 4.58045500   | -1.86223800 | 4.31486400  |
| H | -2.76447500  | -3.59335900 | 0.24400500  |
| H | -2.90556500  | -5.29381600 | 0.68527600  |
| H | 2.43848000   | -3.44442400 | 5.75205600  |
| H | 4.11027300   | -3.87174700 | 5.42580700  |
| H | -12.89452100 | -1.63194500 | -2.67588700 |
| C | -11.94730100 | -1.62562700 | -2.14620300 |
| C | -11.25694200 | -2.82262500 | -1.92695300 |
| C | -11.40766700 | -0.41858800 | -1.68370900 |
| C | -10.03280500 | -2.81049000 | -1.24874600 |
| H | -11.66465000 | -3.76117800 | -2.28881600 |
| C | -10.18936100 | -0.40799200 | -0.99786800 |
| H | -11.93659400 | 0.51340600  | -1.85703300 |
| H | -9.49478000  | -3.74163800 | -1.09059400 |
| C | -9.49263600  | -1.60603300 | -0.77343100 |
| H | -9.76152200  | 0.52489000  | -0.64900500 |
| C | -8.20236800  | -1.60996400 | 0.00756200  |
| O | -7.42094100  | -0.42999200 | -0.34255500 |

|      |             |             |             |
|------|-------------|-------------|-------------|
| H    | -8.40038500 | -1.59324600 | 1.09310600  |
| H    | -7.62347100 | -2.52144000 | -0.20677900 |
| C    | -6.19449100 | -0.29229200 | 0.41283100  |
| C    | -5.52088700 | 0.99705400  | -0.04759100 |
| H    | -6.41300300 | -0.25792500 | 1.49365800  |
| H    | -5.53846100 | -1.16170600 | 0.23451700  |
| C    | -4.17405300 | 1.24957900  | 0.65328600  |
| H    | -5.37736300 | 0.94312600  | -1.13422600 |
| H    | -6.20705800 | 1.83322100  | 0.13883600  |
| C    | -3.53447200 | 2.57727400  | 0.19746300  |
| H    | -3.48863000 | 0.41580100  | 0.44109200  |
| H    | -4.33065200 | 1.25690700  | 1.74122000  |
| H    | -4.17844500 | 3.41245800  | 0.51288900  |
| H    | -3.52730300 | 2.59788200  | -0.89727600 |
| 3a-3 |             |             |             |
| C    | -1.54707600 | 2.64438400  | 2.08722000  |
| C    | -1.85705400 | 2.96800800  | 0.61225700  |
| C    | -0.61000600 | 2.61571400  | -0.21819900 |
| C    | -1.02621900 | 4.08836800  | 0.00210000  |
| C    | 0.44950000  | 2.07610300  | 0.73596900  |
| C    | -0.03201000 | 2.42524400  | 2.15978600  |
| C    | -2.22825400 | 3.51286500  | 3.18081600  |
| C    | -1.83544400 | 3.03791600  | 4.59056000  |
| C    | -2.04464300 | 5.03271400  | 3.03849400  |
| C    | -1.51354600 | 4.90963300  | -1.13345600 |
| C    | -1.33541100 | 6.23153200  | -1.21650200 |
| C    | -0.58773600 | 2.09276200  | -1.61930600 |
| C    | -1.44059600 | 1.23025200  | -2.17727100 |
| O    | 0.78381600  | 3.64703400  | 2.52711800  |
| C    | 1.70585100  | 3.80127200  | 1.63484300  |
| C    | 2.74457600  | 4.85020200  | 1.80501100  |
| O    | 1.69971300  | 3.01043000  | 0.64101400  |
| H    | -1.92862400 | 1.62586200  | 2.25391200  |
| H    | -0.43655700 | 4.67973600  | 0.69729600  |
| H    | 0.25712300  | 1.71986200  | 2.93679200  |
| H    | -3.30292600 | 3.31479100  | 3.06338000  |
| H    | -2.44569600 | 3.54181000  | 5.34736200  |
| H    | -1.98425000 | 1.95769000  | 4.71274900  |
| H    | -0.78627800 | 3.26524200  | 4.81572800  |
| H    | -2.64040700 | 5.54453900  | 3.80243900  |
| H    | -2.37813400 | 5.39746300  | 2.06226900  |
| H    | -1.00212500 | 5.33588500  | 3.18247700  |
| H    | -2.03179300 | 4.39291800  | -1.93746100 |
| H    | -1.70591800 | 6.80207500  | -2.06251100 |

|    |             |             |             |
|----|-------------|-------------|-------------|
| H  | -0.81768700 | 6.79433600  | -0.44203800 |
| H  | 0.23987000  | 2.47084100  | -2.22034900 |
| H  | -1.31843400 | 0.91481000  | -3.20960800 |
| H  | -2.28140500 | 0.80530400  | -1.63880000 |
| H  | 3.14153800  | 5.14730800  | 0.83311500  |
| H  | 3.56349200  | 4.43827500  | 2.40795300  |
| H  | 2.32885800  | 5.70772000  | 2.33820300  |
| Au | 1.09738100  | 0.07968200  | 0.48618700  |
| H  | 6.33353300  | 3.13429100  | -3.66937300 |
| C  | 5.41665400  | 3.72947800  | -3.73588200 |
| C  | 4.56275400  | 3.58325100  | -2.45938400 |
| H  | 4.86123000  | 3.39164600  | -4.61880600 |
| H  | 5.69982800  | 4.77632700  | -3.89622200 |
| C  | 4.23399900  | 2.11973800  | -2.19449300 |
| C  | 3.31668500  | 4.48269600  | -2.53293500 |
| H  | 5.17542100  | 3.93159800  | -1.61548700 |
| C  | 3.26254900  | 1.42901300  | -2.91807900 |
| C  | 4.96335300  | 1.38269700  | -1.26887000 |
| H  | 3.60978100  | 5.53511800  | -2.62184300 |
| H  | 2.68745100  | 4.37100700  | -1.64243700 |
| H  | 2.69754500  | 4.24653200  | -3.40607400 |
| C  | 3.01294900  | 0.06001500  | -2.75193300 |
| H  | 2.69887700  | 1.95693400  | -3.68386200 |
| C  | 4.76293500  | 0.01155500  | -1.03259100 |
| H  | 5.75886800  | 1.88457900  | -0.72020700 |
| C  | 2.02573400  | -0.50383600 | -3.79503400 |
| C  | 3.74724400  | -0.66596500 | -1.76318300 |
| C  | 5.75769300  | -0.54836000 | 0.00918000  |
| H  | 1.42546500  | 0.36723600  | -4.08805500 |
| C  | 2.75882700  | -0.95769100 | -5.07710400 |
| C  | 1.00729500  | -1.56142200 | -3.35315100 |
| C  | 3.58628800  | -2.17010900 | -1.69895300 |
| C  | 6.09372000  | -2.04749700 | 0.02813500  |
| C  | 5.38891200  | -0.04202700 | 1.42229300  |
| H  | 6.70732000  | -0.05637700 | -0.24165100 |
| H  | 2.03133700  | -1.16894300 | -5.86993700 |
| H  | 3.44226300  | -0.18356700 | -5.44176300 |
| H  | 3.33696200  | -1.87097400 | -4.90751000 |
| H  | 0.22786500  | -1.64830100 | -4.12021400 |
| H  | 0.52153300  | -1.27299800 | -2.41679200 |
| H  | 1.45012900  | -2.55159000 | -3.22896600 |
| C  | 4.36156500  | -2.87478800 | -2.63965800 |
| C  | 2.73749800  | -2.92687300 | -0.84420900 |
| H  | 6.91368100  | -2.20903100 | 0.73775500  |

|   |             |             |             |
|---|-------------|-------------|-------------|
| H | 6.43056900  | -2.40068100 | -0.94980100 |
| H | 5.26094400  | -2.68289000 | 0.33868500  |
| H | 5.40340400  | 1.05210500  | 1.46545600  |
| H | 4.38392900  | -0.36157800 | 1.71264500  |
| H | 6.10011600  | -0.41715400 | 2.16784900  |
| C | 4.31573100  | -4.25931600 | -2.77385700 |
| H | 5.02286300  | -2.30176300 | -3.28215100 |
| C | 2.69659600  | -4.32766000 | -1.00342000 |
| P | 1.69080600  | -2.23638400 | 0.52519400  |
| C | 3.46688600  | -4.99514700 | -1.95127400 |
| H | 4.93394200  | -4.75420500 | -3.51731800 |
| H | 2.03570900  | -4.92146700 | -0.38288100 |
| C | 0.13190600  | -3.29517500 | 0.59658400  |
| C | 2.69414800  | -2.61946200 | 2.08546700  |
| H | 3.40060400  | -6.07534900 | -2.04096400 |
| C | -0.60124100 | -3.37230500 | -0.75970800 |
| C | -0.84957100 | -2.80256800 | 1.68693300  |
| H | 0.45400400  | -4.30771100 | 0.87532900  |
| C | 2.81140500  | -4.12185000 | 2.49671500  |
| C | 2.29657600  | -1.72718500 | 3.28942600  |
| H | 3.69159400  | -2.29566400 | 1.77470900  |
| C | -1.83537100 | -4.28664900 | -0.67652900 |
| H | -0.91968100 | -2.36136500 | -1.04777800 |
| H | 0.07085000  | -3.72710100 | -1.54596900 |
| C | -2.09006200 | -3.71079400 | 1.77197500  |
| H | -0.36492100 | -2.76491200 | 2.66667600  |
| H | -1.16072500 | -1.77548900 | 1.44921500  |
| C | 2.02735600  | -4.45331400 | 3.77503200  |
| H | 2.51117400  | -4.79202400 | 1.68703900  |
| H | 3.87257100  | -4.34094700 | 2.67041400  |
| C | 3.00136400  | -2.21408900 | 4.56537200  |
| H | 1.21217200  | -1.73043300 | 3.44804200  |
| H | 2.56750700  | -0.68713800 | 3.07271300  |
| C | -2.80613100 | -3.83182100 | 0.42087400  |
| H | -2.33871100 | -4.30590600 | -1.65061600 |
| H | -1.51070700 | -5.31769400 | -0.47384800 |
| H | -2.77329300 | -3.31964700 | 2.53599700  |
| H | -1.78244300 | -4.70969600 | 2.11369600  |
| C | 2.52232300  | -3.62590300 | 4.98215000  |
| H | 0.95909200  | -4.26728200 | 3.60744900  |
| H | 2.11449500  | -5.52431100 | 3.99054400  |
| H | 2.83587100  | -1.49999600 | 5.38027400  |
| H | 4.08452400  | -2.22209100 | 4.38374100  |
| H | -3.23172600 | -2.85484600 | 0.14632000  |

|                     |              |             |             |
|---------------------|--------------|-------------|-------------|
| H                   | -3.64873800  | -4.52899000 | 0.49910900  |
| H                   | 1.71490300   | -3.54705500 | 5.71977300  |
| H                   | 3.34315200   | -4.15264100 | 5.48284800  |
| H                   | -12.70299400 | -1.41866800 | -2.64761600 |
| C                   | -11.74253000 | -1.40223600 | -2.13982200 |
| C                   | -11.04152900 | -2.59012200 | -1.92640900 |
| C                   | -11.20021300 | -0.19142500 | -1.70199400 |
| C                   | -9.80414100  | -2.56437300 | -1.28008200 |
| H                   | -11.45200400 | -3.53574500 | -2.27019200 |
| C                   | -9.96835800  | -0.16832400 | -1.04772700 |
| H                   | -11.73887300 | 0.73751900  | -1.86981800 |
| H                   | -9.25712800  | -3.49233600 | -1.12601600 |
| C                   | -9.25969900  | -1.35646600 | -0.83069200 |
| H                   | -9.54117200  | 0.77192500  | -0.71370500 |
| C                   | -7.94853800  | -1.34659200 | -0.07994700 |
| O                   | -7.20970300  | -0.17994900 | -0.40772000 |
| H                   | -8.13095700  | -1.36946600 | 1.00996600  |
| H                   | -7.36439500  | -2.25042900 | -0.32236900 |
| C                   | -6.00084900  | -0.06589800 | 0.31049000  |
| C                   | -5.31346100  | 1.22866100  | -0.11119100 |
| H                   | -6.19402800  | -0.06494900 | 1.39853900  |
| H                   | -5.34637700  | -0.93306900 | 0.10245300  |
| C                   | -3.95153000  | 1.43079000  | 0.56517600  |
| H                   | -5.19395100  | 1.21741500  | -1.20224700 |
| H                   | -5.97866200  | 2.07017900  | 0.12107500  |
| C                   | -3.29793700  | 2.76343500  | 0.15592200  |
| H                   | -3.28575100  | 0.59371100  | 0.30883000  |
| H                   | -4.08212400  | 1.39258200  | 1.65565200  |
| H                   | -3.90245300  | 3.59098900  | 0.55346500  |
| H                   | -3.34796700  | 2.86077200  | -0.93228000 |
| Ts <sub>3a</sub> -3 |              |             |             |
| C                   | -1.33821900  | 2.43649600  | 2.07559800  |
| C                   | -1.67426900  | 2.93251300  | 0.65110400  |
| C                   | -0.40476600  | 2.78703400  | -0.19984000 |
| C                   | -0.91010100  | 4.18359200  | 0.20404700  |
| C                   | 0.66596700   | 2.20189400  | 0.71892900  |
| C                   | 0.15354800   | 2.27089500  | 2.07499600  |
| C                   | -2.01274500  | 3.14383900  | 3.29236600  |
| C                   | -1.56844600  | 2.50414200  | 4.61806400  |
| C                   | -1.86081400  | 4.67154200  | 3.33810500  |
| C                   | -1.46486200  | 5.11070000  | -0.81226000 |
| C                   | -1.39982300  | 6.44165500  | -0.70760000 |
| C                   | -0.34177400  | 2.43321300  | -1.65019400 |
| C                   | -1.10245200  | 1.54080100  | -2.28926700 |

|    |             |             |             |
|----|-------------|-------------|-------------|
| O  | 1.20759900  | 3.88788100  | 2.51790200  |
| C  | 2.04796700  | 3.83296300  | 1.60402600  |
| C  | 3.20643100  | 4.77201300  | 1.49066300  |
| O  | 1.94931700  | 2.91940000  | 0.65178500  |
| H  | -1.68657200 | 1.39134000  | 2.15183300  |
| H  | -0.35941500 | 4.70536100  | 0.97866900  |
| H  | 0.65613500  | 1.80807200  | 2.91441600  |
| H  | -3.08365700 | 2.93102100  | 3.17015600  |
| H  | -2.18217500 | 2.87814100  | 5.44400200  |
| H  | -1.66924200 | 1.41136700  | 4.60091800  |
| H  | -0.52561800 | 2.74904500  | 4.85386500  |
| H  | -2.42681100 | 5.06377300  | 4.19048000  |
| H  | -2.25234600 | 5.15056200  | 2.43599200  |
| H  | -0.81693700 | 4.97399700  | 3.46622100  |
| H  | -1.93443000 | 4.67216200  | -1.68985200 |
| H  | -1.81358400 | 7.09193300  | -1.47224000 |
| H  | -0.93570800 | 6.93100500  | 0.14646400  |
| H  | 0.41942700  | 2.97252300  | -2.21464300 |
| H  | -0.97302400 | 1.35392000  | -3.35163900 |
| H  | -1.87702000 | 0.96756300  | -1.78866300 |
| H  | 2.91161100  | 5.61369400  | 0.85235300  |
| H  | 4.05407800  | 4.27059900  | 1.01935200  |
| H  | 3.47577500  | 5.15778600  | 2.47481300  |
| Au | 1.07963600  | 0.08602300  | 0.45924200  |
| H  | 6.47201100  | 2.91067700  | -3.63034100 |
| C  | 5.57928500  | 3.53704400  | -3.73033400 |
| C  | 4.68973700  | 3.44618600  | -2.47337700 |
| H  | 5.03349900  | 3.20336200  | -4.62081200 |
| H  | 5.90387700  | 4.56990400  | -3.90173700 |
| C  | 4.29913800  | 2.00155400  | -2.19001000 |
| C  | 3.47955800  | 4.38899000  | -2.59353400 |
| H  | 5.29426300  | 3.78789000  | -1.62071200 |
| C  | 3.32737800  | 1.33237900  | -2.93251200 |
| C  | 4.96496100  | 1.25886700  | -1.22158500 |
| H  | 3.81336200  | 5.42786900  | -2.69632500 |
| H  | 2.82906800  | 4.32015300  | -1.71446100 |
| H  | 2.87331000  | 4.15703500  | -3.47699700 |
| C  | 3.01956700  | -0.02239400 | -2.74853900 |
| H  | 2.80981400  | 1.86535600  | -3.72648700 |
| C  | 4.70155800  | -0.09722000 | -0.96297000 |
| H  | 5.75733700  | 1.74234500  | -0.65209200 |
| C  | 2.04756500  | -0.56923800 | -3.81461900 |
| C  | 3.69044500  | -0.75366800 | -1.71944700 |
| C  | 5.61859000  | -0.66793000 | 0.14093700  |



|   |             |             |             |
|---|-------------|-------------|-------------|
| H | 1.49466100  | 0.31887000  | -4.14567400 |
| C | 2.80443400  | -1.08069900 | -5.06101000 |
| C | 0.97157000  | -1.57467200 | -3.38853500 |
| C | 3.48618600  | -2.25209900 | -1.64330500 |
| C | 5.92760900  | -2.17240900 | 0.18460000  |
| C | 5.16752000  | -0.14696600 | 1.52451700  |
| H | 6.59033300  | -0.19301600 | -0.04985600 |
| H | 2.09674300  | -1.27234700 | -5.87640300 |
| H | 3.53589900  | -0.34591900 | -5.41364100 |
| H | 3.33274800  | -2.01662900 | -4.85567500 |
| H | 0.22259300  | -1.65520000 | -4.18580200 |
| H | 0.45655900  | -1.24216800 | -2.48228100 |
| H | 1.37106200  | -2.57615500 | -3.21757100 |
| C | 4.27769500  | -2.98711700 | -2.54688000 |
| C | 2.58895400  | -2.97967400 | -0.81347500 |
| H | 6.70471900  | -2.34436600 | 0.93859800  |
| H | 6.31155400  | -2.53537700 | -0.77244900 |
| H | 5.06883600  | -2.79301000 | 0.45135100  |
| H | 5.19261800  | 0.94725400  | 1.55928800  |
| H | 4.14137700  | -0.45047800 | 1.75253200  |
| H | 5.82453600  | -0.52508400 | 2.31687800  |
| C | 4.20271800  | -4.37151700 | -2.66788200 |
| H | 4.97645900  | -2.43830800 | -3.17045300 |
| C | 2.51738400  | -4.38102400 | -0.95975300 |
| P | 1.51273900  | -2.25563100 | 0.51104000  |
| C | 3.30578800  | -5.07773300 | -1.87063600 |
| H | 4.83593500  | -4.88947100 | -3.38240300 |
| H | 1.81827000  | -4.95116400 | -0.35911100 |
| C | -0.09120300 | -3.24681500 | 0.51861900  |
| C | 2.42621900  | -2.67384900 | 2.11878200  |
| H | 3.21586400  | -6.15681800 | -1.95202800 |
| C | -0.75499100 | -3.35802200 | -0.87027600 |
| C | -1.11228500 | -2.68270000 | 1.53492600  |
| H | 0.18165400  | -4.25728600 | 0.85239500  |
| C | 2.45959400  | -4.17934500 | 2.53418400  |
| C | 2.00822300  | -1.76682400 | 3.30509500  |
| H | 3.45016200  | -2.39234600 | 1.85613700  |
| C | -2.01019700 | -4.24583800 | -0.81221300 |
| H | -1.03849300 | -2.35356300 | -1.21150000 |
| H | -0.05284500 | -3.75485200 | -1.60842900 |
| C | -2.37556700 | -3.56099100 | 1.59581600  |
| H | -0.67581400 | -2.61030400 | 2.53525700  |
| H | -1.38694500 | -1.66141700 | 1.23420400  |
| C | 1.58834200  | -4.47701600 | 3.76344700  |

|   |              |             |             |
|---|--------------|-------------|-------------|
| H | 2.18409900   | -4.83861600 | 1.70731800  |
| H | 3.49938700   | -4.43792100 | 2.77084400  |
| C | 2.62243800   | -2.28807700 | 4.61365300  |
| H | 0.91832400   | -1.72129100 | 3.40950300  |
| H | 2.33749200   | -0.73990800 | 3.10821000  |
| C | -3.02448300  | -3.72842500 | 0.21591700  |
| H | -2.46537900  | -4.29565800 | -1.80853200 |
| H | -1.71623600  | -5.27323400 | -0.55254900 |
| H | -3.08806900  | -3.12248400 | 2.30530000  |
| H | -2.10683300  | -4.54898000 | 1.99683100  |
| C | 2.05323800   | -3.67505100 | 4.99947300  |
| H | 0.54087100   | -4.24114500 | 3.53589000  |
| H | 1.61362900   | -5.55120700 | 3.97877600  |
| H | 2.44912300   | -1.56738600 | 5.42089800  |
| H | 3.71190600   | -2.34799400 | 4.48891200  |
| H | -3.41732000  | -2.75739900 | -0.12060600 |
| H | -3.88310900  | -4.40706900 | 0.28063100  |
| H | 1.21024900   | -3.55700800 | 5.69045200  |
| H | 2.81825200   | -4.24094600 | 5.54366800  |
| H | -12.77336700 | -0.80379400 | -2.44898600 |
| C | -11.77888900 | -0.89163300 | -2.02016700 |
| C | -11.10925000 | -2.11575800 | -2.04678700 |
| C | -11.16160500 | 0.22167000  | -1.44404200 |
| C | -9.82823100  | -2.22340500 | -1.50136300 |
| H | -11.57851600 | -2.98511600 | -2.49939600 |
| C | -9.88600100  | 0.11017100  | -0.89113200 |
| H | -11.67585700 | 1.17895000  | -1.42470300 |
| H | -9.30631900  | -3.17761900 | -1.53478000 |
| C | -9.20803700  | -1.11512800 | -0.91486800 |
| H | -9.40116800  | 0.97590900  | -0.45086300 |
| C | -7.84577600  | -1.25256100 | -0.27618000 |
| O | -7.07602000  | -0.08598800 | -0.52557200 |
| H | -7.94672900  | -1.39652200 | 0.81503300  |
| H | -7.32914400  | -2.14467700 | -0.66819700 |
| C | -5.82389000  | -0.08830800 | 0.12375400  |
| C | -5.12310600  | 1.22726800  | -0.19773300 |
| H | -5.95287400  | -0.20110500 | 1.21561600  |
| H | -5.21325100  | -0.94505900 | -0.21732700 |
| C | -3.73483000  | 1.35104800  | 0.44456200  |
| H | -5.04313200  | 1.32195300  | -1.28813600 |
| H | -5.76477300  | 2.05117500  | 0.14004800  |
| C | -3.10305300  | 2.72531600  | 0.16080500  |
| H | -3.07999400  | 0.54922900  | 0.07252600  |
| H | -3.82703900  | 1.19333200  | 1.52863600  |

|      |             |             |             |
|------|-------------|-------------|-------------|
| H    | -3.73478600 | 3.49972100  | 0.61868800  |
| H    | -3.14410200 | 2.91282600  | -0.91623800 |
| 4a-3 |             |             |             |
| C    | -2.47073700 | 1.20879000  | -0.92894400 |
| C    | -1.94742400 | 0.77653600  | 0.46197100  |
| C    | -2.66092000 | -0.54158100 | 0.81952700  |
| C    | -2.95072600 | 0.76243900  | 1.61075400  |
| C    | -3.66414700 | -0.71209900 | -0.28240300 |
| C    | -3.61981600 | 0.25948800  | -1.20420700 |
| C    | -2.75010200 | 2.72454000  | -1.14383000 |
| C    | -2.99699300 | 3.01196700  | -2.63535800 |
| C    | -3.88565000 | 3.31329800  | -0.29309900 |
| C    | -2.56720100 | 0.94923400  | 3.02723800  |
| C    | -3.34809000 | 1.55789900  | 3.92621300  |
| C    | -1.97286500 | -1.68977200 | 1.45396300  |
| C    | -1.95194400 | -2.95314100 | 1.01595300  |
| O    | -4.52641300 | -1.78652700 | -0.13887300 |
| C    | -5.55417000 | -2.04190500 | -1.00432600 |
| C    | -6.28985100 | -3.28255300 | -0.55788100 |
| O    | -5.82476500 | -1.37153200 | -1.97094200 |
| H    | -1.67372100 | 0.97402600  | -1.65303200 |
| H    | -3.93296400 | 1.16864200  | 1.39076600  |
| H    | -4.29466100 | 0.35736700  | -2.04009900 |
| H    | -1.82293500 | 3.24730000  | -0.86402900 |
| H    | -3.07146600 | 4.09072700  | -2.81499900 |
| H    | -2.18471100 | 2.62286900  | -3.26126900 |
| H    | -3.93267500 | 2.55660600  | -2.98193700 |
| H    | -4.05379000 | 4.36231300  | -0.56512700 |
| H    | -3.65653500 | 3.28516000  | 0.77579100  |
| H    | -4.82744000 | 2.77483800  | -0.45611200 |
| H    | -1.60046700 | 0.57494100  | 3.35673300  |
| H    | -3.03602000 | 1.68248700  | 4.95904700  |
| H    | -4.32657900 | 1.95312800  | 3.66162100  |
| H    | -1.42494600 | -1.45708400 | 2.36527000  |
| H    | -1.40298800 | -3.71838100 | 1.55732900  |
| H    | -2.48101000 | -3.27138000 | 0.12376800  |
| H    | -5.60907700 | -4.14005200 | -0.53946300 |
| H    | -7.11484700 | -3.47828400 | -1.24341900 |
| H    | -6.67202900 | -3.14926100 | 0.45941600  |
| H    | 5.92606500  | -0.13079500 | 1.49128000  |
| C    | 6.79637700  | -0.19621700 | 0.84699500  |
| C    | 8.08057700  | -0.03265700 | 1.36844800  |
| C    | 6.61277100  | -0.43038100 | -0.52006500 |
| C    | 9.19620900  | -0.10842900 | 0.53270100  |

|   |             |             |             |
|---|-------------|-------------|-------------|
| H | 8.20948300  | 0.15487100  | 2.43150400  |
| C | 7.73496600  | -0.49671900 | -1.35398000 |
| C | 5.23247300  | -0.65768200 | -1.09498300 |
| H | 10.19550900 | 0.01875600  | 0.94070200  |
| C | 9.01966900  | -0.34217400 | -0.83237300 |
| H | 7.60314300  | -0.66758100 | -2.42078300 |
| O | 4.25683700  | -0.01732500 | -0.29633500 |
| H | 5.18962900  | -0.28368300 | -2.13256200 |
| H | 5.01954400  | -1.74178900 | -1.14436800 |
| H | 9.88096600  | -0.39508600 | -1.49336600 |
| C | 2.93142300  | -0.26563500 | -0.73272000 |
| C | 1.96718500  | 0.45916700  | 0.19775700  |
| H | 2.80154300  | 0.08584600  | -1.77146400 |
| H | 2.72706300  | -1.35085400 | -0.73188700 |
| C | 0.49849700  | 0.24657300  | -0.19147400 |
| H | 2.14164900  | 0.10649800  | 1.22293700  |
| H | 2.21204500  | 1.52949200  | 0.18883000  |
| C | -0.46549700 | 0.99855100  | 0.74304700  |
| H | 0.25798500  | -0.82430500 | -0.16711600 |
| H | 0.35252000  | 0.57373700  | -1.22935000 |
| H | -0.25746000 | 2.07757700  | 0.68869400  |
| H | -0.23018100 | 0.70919900  | 1.77235200  |

Ts<sub>4a</sub>-3

|   |             |             |             |
|---|-------------|-------------|-------------|
| C | -2.70794500 | 1.37315700  | -0.71479000 |
| C | -4.14176400 | 0.92248000  | -0.89906900 |
| C | -2.67377100 | 2.85384000  | -0.20350300 |
| C | -3.38693200 | 3.13997100  | 1.12909200  |
| C | -1.28880400 | 3.51259800  | -0.20507900 |
| C | -2.00791400 | 0.15544200  | 0.02714500  |
| C | -3.04334600 | -0.97027300 | -0.05219700 |
| C | -4.29533700 | -0.35196900 | -0.51329000 |
| O | -5.41135700 | -1.17145200 | -0.51378900 |
| C | -6.64138800 | -0.75612800 | -0.94339200 |
| C | -7.62455300 | -1.89625500 | -0.83157900 |
| O | -6.89060200 | 0.35320600  | -1.34751300 |
| C | -2.33900800 | 0.07313800  | 1.50304800  |
| C | -1.84060500 | -0.77166600 | 2.50071300  |
| C | -0.88920100 | -1.76956200 | 2.37327600  |
| C | -1.85290100 | -3.09292100 | 0.60177100  |
| C | -2.95674800 | -2.34627400 | 0.23244200  |
| C | -0.58382400 | -0.14734100 | -0.48341100 |
| H | -4.91649700 | 1.56493700  | -1.28881900 |
| H | -3.25909300 | 3.37448900  | -0.97731800 |
| H | -3.53662600 | 4.22054600  | 1.24154400  |

|      |             |             |             |
|------|-------------|-------------|-------------|
| H    | -4.37102300 | 2.66094500  | 1.17886100  |
| H    | -2.79713700 | 2.80441000  | 1.98860000  |
| H    | -1.39040000 | 4.59859700  | -0.09041500 |
| H    | -0.74786800 | 3.32856900  | -1.14108400 |
| H    | -0.67134200 | 3.15663800  | 0.62565700  |
| H    | -8.60833500 | -1.55680600 | -1.15684100 |
| H    | -7.67514000 | -2.25295800 | 0.20231700  |
| H    | -7.29726100 | -2.73725800 | -1.45189700 |
| H    | -3.17072300 | 0.69858300  | 1.79954100  |
| H    | -2.43389000 | -0.77807500 | 3.41597600  |
| H    | -0.06829600 | -1.68890800 | 1.67606700  |
| H    | -0.71200200 | -2.44161000 | 3.20835100  |
| H    | -0.86494700 | -2.91475400 | 0.20797100  |
| H    | -2.01576700 | -4.11048500 | 0.94817100  |
| H    | -3.92817500 | -2.82422000 | 0.35023500  |
| H    | -0.38164000 | -1.21368800 | -0.38175900 |
| H    | -0.57598700 | 0.03378600  | -1.56679400 |
| H    | -2.23746400 | 1.42276900  | -1.71117300 |
| C    | 0.58348800  | 0.61515500  | 0.16539800  |
| H    | 0.56563600  | 1.66544700  | -0.13810300 |
| H    | 0.46854300  | 0.60456800  | 1.25678800  |
| C    | 1.94338900  | 0.01301000  | -0.21556600 |
| H    | 2.00709600  | -1.03060400 | 0.12094800  |
| H    | 2.05954400  | -0.00388000 | -1.30751500 |
| C    | 3.11254400  | 0.78324000  | 0.38495800  |
| H    | 3.03025000  | 0.80941500  | 1.48571900  |
| H    | 3.10548300  | 1.83118600  | 0.03618900  |
| O    | 4.32081500  | 0.14953600  | 0.00111100  |
| C    | 5.47103900  | 0.80226200  | 0.50200000  |
| H    | 5.46864100  | 0.79781000  | 1.60568600  |
| H    | 5.45940300  | 1.86426300  | 0.19357700  |
| C    | 6.72348700  | 0.13079100  | -0.01531100 |
| C    | 7.91754000  | 0.23022200  | 0.70821100  |
| C    | 6.72441000  | -0.55609800 | -1.23422700 |
| C    | 9.09512600  | -0.33672900 | 0.22005500  |
| H    | 7.92642600  | 0.75270800  | 1.66298000  |
| C    | 7.89988400  | -1.13129900 | -1.71921800 |
| H    | 5.79629500  | -0.64597000 | -1.78865600 |
| C    | 9.08943000  | -1.02089100 | -0.99692400 |
| H    | 10.01396100 | -0.25176500 | 0.79459100  |
| H    | 7.88564000  | -1.66761500 | -2.66474200 |
| H    | 10.00407500 | -1.46878700 | -1.37644000 |
| 5a-3 |             |             |             |
| C    | 2.68285400  | -0.62176700 | -1.50283300 |

|   |             |             |             |
|---|-------------|-------------|-------------|
| C | 2.69075200  | 0.87856900  | -1.32706400 |
| C | 3.96212900  | -1.04831400 | -2.30723900 |
| C | 5.27557600  | -0.95520000 | -1.51581000 |
| C | 3.82774700  | -2.39148500 | -3.04844000 |
| C | 2.41815400  | -1.15270200 | -0.02668100 |
| C | 2.85597200  | 0.03030600  | 0.85008000  |
| C | 2.81877700  | 1.20542200  | -0.03202200 |
| O | 2.94511700  | 2.43922400  | 0.58474600  |
| C | 2.95109200  | 3.62081800  | -0.10267200 |
| C | 3.12956500  | 4.76565100  | 0.86562200  |
| O | 2.82982800  | 3.72286400  | -1.29901200 |
| C | 3.07960300  | -2.47567300 | 0.31857700  |
| C | 3.24316200  | -2.99833900 | 1.53958900  |
| C | 2.85168300  | -2.36338900 | 2.85432100  |
| C | 3.49888900  | -0.99902900 | 3.13153700  |
| C | 3.25981100  | 0.09663200  | 2.12959600  |
| H | 2.66637200  | 1.57017900  | -2.15606100 |
| H | 4.02668200  | -0.28950500 | -3.10214500 |
| H | 6.13116500  | -1.11148400 | -2.18396800 |
| H | 5.38822300  | 0.03041700  | -1.05258600 |
| H | 5.33156200  | -1.70578900 | -0.72094500 |
| H | 4.64436800  | -2.50286500 | -3.77206300 |
| H | 2.88347000  | -2.44518000 | -3.60400600 |
| H | 3.87183400  | -3.26055300 | -2.38426300 |
| H | 2.33411500  | 4.75315300  | 1.61776900  |
| H | 3.10912200  | 5.70787100  | 0.31729900  |
| H | 4.08246900  | 4.66511300  | 1.39589000  |
| H | 3.36505900  | -3.09606700 | -0.52372700 |
| H | 3.68245800  | -3.99365200 | 1.59927900  |
| H | 1.75947200  | -2.24966200 | 2.90511700  |
| H | 3.11831700  | -3.04094100 | 3.67375500  |
| H | 3.16496200  | -0.64689100 | 4.11861800  |
| H | 4.58820700  | -1.13555000 | 3.23012800  |
| H | 3.51945700  | 1.09092800  | 2.49168100  |
| H | -9.45561200 | 1.22986300  | 0.58008000  |
| C | -8.61364600 | 0.60817600  | 0.28649600  |
| C | -8.81742700 | -0.72638000 | -0.06930800 |
| C | -7.32570400 | 1.14455800  | 0.27722000  |
| H | -9.81890900 | -1.14846900 | -0.05708500 |
| C | -7.72578500 | -1.51627800 | -0.43436900 |
| C | -6.22811200 | 0.36054800  | -0.09653700 |
| H | -7.17184900 | 2.18260700  | 0.56604800  |
| C | -6.43904100 | -0.97618500 | -0.45183100 |
| H | -7.87555000 | -2.55797600 | -0.70699300 |

|   |             |             |             |
|---|-------------|-------------|-------------|
| C | -4.84773600 | 0.97556500  | -0.15859500 |
| H | -5.58670600 | -1.58788500 | -0.72776800 |
| O | -3.85901500 | -0.01975000 | 0.01681200  |
| H | -4.70353000 | 1.47544200  | -1.13451600 |
| H | -4.74856200 | 1.76037100  | 0.61128200  |
| C | -2.53908400 | 0.47561100  | -0.13401600 |
| C | -1.55911300 | -0.67438500 | 0.06115600  |
| H | -2.41424900 | 0.92445700  | -1.13527900 |
| H | -2.34691000 | 1.27477100  | 0.60328900  |
| C | -0.09616200 | -0.23449000 | -0.09465700 |
| H | -1.72301100 | -1.10759400 | 1.05660000  |
| H | -1.79751500 | -1.46186400 | -0.66607600 |
| C | 0.86957800  | -1.40840800 | 0.12024100  |
| H | 0.12470300  | 0.56033800  | 0.62954800  |
| H | 0.04480800  | 0.20674100  | -1.08912900 |
| H | 0.61375500  | -2.21341500 | -0.58331900 |
| H | 0.69159900  | -1.81430400 | 1.12202600  |
| H | 1.83157200  | -0.92029900 | -2.13300800 |

1d-3

|   |             |             |             |
|---|-------------|-------------|-------------|
| C | 2.28225200  | -2.20025000 | 0.34848700  |
| C | 3.25054800  | -1.63557500 | 1.38486000  |
| C | 0.21026700  | 0.14755100  | 1.74802600  |
| C | 3.04550900  | -1.98333500 | 2.67819200  |
| C | 0.48901300  | -0.48134200 | 0.71904100  |
| C | 1.34118300  | -1.14464100 | -0.30641700 |
| C | 2.90733700  | -3.19137800 | -0.69701100 |
| C | 1.86114500  | -4.22258000 | -1.15854600 |
| C | 3.59879200  | -2.57099200 | -1.92335100 |
| C | 3.82529800  | -1.56948300 | 3.83769400  |
| C | 3.58401600  | -2.00660600 | 5.08549600  |
| C | -0.03611300 | 0.87444600  | 2.95135700  |
| C | 0.55894500  | 0.57135600  | 4.11688600  |
| O | 2.09366600  | -0.12497100 | -0.99927600 |
| C | 1.48471100  | 0.45695900  | -2.07169700 |
| C | 2.39418700  | 1.46524000  | -2.72293500 |
| O | 0.36085700  | 0.17409700  | -2.42697800 |
| H | 1.57692700  | -2.81729200 | 0.92026100  |
| H | 2.21474600  | -2.65290200 | 2.90761500  |
| H | 0.70703300  | -1.64411400 | -1.04020800 |
| H | 3.66855400  | -3.74284100 | -0.13016200 |
| H | 2.32285400  | -4.96746600 | -1.81588300 |
| H | 1.41822800  | -4.75694600 | -0.30994100 |
| H | 1.04684100  | -3.75475900 | -1.72823200 |

|    |             |             |             |
|----|-------------|-------------|-------------|
| H  | 4.11569700  | -3.35772100 | -2.48420800 |
| H  | 4.33917500  | -1.81278800 | -1.65787200 |
| H  | 2.87506800  | -2.11349600 | -2.60755400 |
| H  | 4.64013600  | -0.86604500 | 3.68029500  |
| H  | 4.18039200  | -1.67825700 | 5.93101300  |
| H  | 2.79293700  | -2.72364100 | 5.29641900  |
| H  | -0.70857700 | 1.72340000  | 2.87024800  |
| H  | 0.37150300  | 1.18031000  | 4.99603500  |
| H  | 1.25513200  | -0.25468900 | 4.22062200  |
| H  | 2.64062800  | 2.26062300  | -2.01156800 |
| H  | 1.90050100  | 1.88964200  | -3.59746600 |
| H  | 3.33457600  | 0.98955100  | -3.01912700 |
| Au | -1.77776300 | -0.33875500 | 0.36607700  |
| H  | -0.73808200 | 6.76794900  | 0.21491700  |
| C  | 0.02522300  | 6.18512000  | 0.74116700  |
| C  | 0.20877400  | 4.79657900  | 0.09820500  |
| H  | -0.28004200 | 6.10291600  | 1.79114300  |
| H  | 0.96453300  | 6.74880900  | 0.71196600  |
| C  | -1.10130600 | 4.02350600  | 0.03839700  |
| C  | 1.31797500  | 4.00094300  | 0.81224600  |
| H  | 0.53344000  | 4.95560300  | -0.93910400 |
| C  | -1.79355300 | 3.64518300  | 1.19118400  |
| C  | -1.69632200 | 3.71125600  | -1.17633500 |
| H  | 2.26644000  | 4.54924200  | 0.77957100  |
| H  | 1.47261000  | 3.02108800  | 0.34480800  |
| H  | 1.07380000  | 3.83115400  | 1.86781200  |
| C  | -3.01635300 | 2.96223800  | 1.16035300  |
| H  | -1.39667300 | 3.93972300  | 2.16060500  |
| C  | -2.91468200 | 3.01713700  | -1.29559200 |
| H  | -1.21094300 | 4.04990400  | -2.08898600 |
| C  | -3.67892500 | 2.82815100  | 2.54855500  |
| C  | -3.56805200 | 2.58745400  | -0.10783000 |
| C  | -3.37138400 | 2.90503800  | -2.77080400 |
| H  | -2.84540800 | 2.94673200  | 3.25364500  |
| C  | -4.63109900 | 4.00923300  | 2.84227700  |
| C  | -4.33797400 | 1.49539300  | 2.92941100  |
| C  | -4.92881400 | 1.92894400  | -0.14070800 |
| C  | -4.84034000 | 2.60585800  | -3.10788100 |
| C  | -2.43104800 | 1.97850900  | -3.57385800 |
| H  | -3.19736000 | 3.91549800  | -3.16666700 |
| H  | -4.91064000 | 4.00777300  | 3.90243600  |
| H  | -4.15478300 | 4.96948700  | 2.61859600  |
| H  | -5.55332300 | 3.94032600  | 2.25853000  |
| H  | -4.52742100 | 1.48641200  | 4.00947400  |



|   |             |             |             |
|---|-------------|-------------|-------------|
| H | -3.68439900 | 0.64688000  | 2.70188400  |
| H | -5.29628500 | 1.33722200  | 2.43063100  |
| C | -6.02204900 | 2.81266400  | -0.07971400 |
| C | -5.21086800 | 0.53651600  | -0.19669600 |
| H | -4.96794100 | 2.69692200  | -4.19273000 |
| H | -5.52453000 | 3.31583000  | -2.63706500 |
| H | -5.16163700 | 1.59907700  | -2.82645300 |
| H | -1.38597000 | 2.28998600  | -3.50063600 |
| H | -2.46836500 | 0.94721100  | -3.21501200 |
| H | -2.71231500 | 1.98212900  | -4.63338500 |
| C | -7.34428500 | 2.37877400  | -0.05841300 |
| H | -5.81202200 | 3.87718700  | -0.05713300 |
| C | -6.55632600 | 0.11315900  | -0.16721500 |
| P | -3.95619100 | -0.81433200 | -0.36436000 |
| C | -7.61549500 | 1.01336700  | -0.09734800 |
| H | -8.15290200 | 3.10232100  | -0.01064700 |
| H | -6.79260500 | -0.94444300 | -0.18689900 |
| C | -4.60295200 | -2.29817400 | 0.59208000  |
| C | -3.95193700 | -1.23604300 | -2.19883300 |
| H | -8.63726100 | 0.64670800  | -0.07412200 |
| C | -4.95009300 | -1.96333900 | 2.05855200  |
| C | -3.61845000 | -3.49101700 | 0.54929300  |
| H | -5.52246600 | -2.61046800 | 0.07804900  |
| C | -5.23602100 | -1.94714800 | -2.73521200 |
| C | -2.65390700 | -1.94533000 | -2.66215200 |
| H | -3.93148200 | -0.23378300 | -2.63504700 |
| C | -5.54086600 | -3.18719100 | 2.78069300  |
| H | -4.03380500 | -1.64692200 | 2.57566800  |
| H | -5.65077000 | -1.12543200 | 2.11423400  |
| C | -4.20492800 | -4.71661900 | 1.27461600  |
| H | -3.37438000 | -3.76393700 | -0.48109800 |
| H | -2.67588100 | -3.19612800 | 1.03225700  |
| C | -4.97492800 | -3.40183400 | -3.15322900 |
| H | -6.06061900 | -1.90249600 | -2.01798600 |
| H | -5.58654900 | -1.38622600 | -3.61042900 |
| C | -2.81057700 | -2.41105500 | -4.11858700 |
| H | -2.42393000 | -2.80956900 | -2.02851300 |
| H | -1.80674100 | -1.25694800 | -2.57053700 |
| C | -4.59439400 | -4.39321900 | 2.72263400  |
| H | -5.76093100 | -2.92079000 | 3.82126800  |
| H | -6.50217100 | -3.45164700 | 2.31683300  |
| H | -3.47557800 | -5.53501300 | 1.24541200  |
| H | -5.09034300 | -5.06896900 | 0.72611500  |
| C | -3.90716300 | -3.49463600 | -4.26506300 |

|                     |             |             |             |
|---------------------|-------------|-------------|-------------|
| H                   | -4.65503000 | -3.98158700 | -2.27812600 |
| H                   | -5.91240000 | -3.85904100 | -3.48945800 |
| H                   | -1.85108300 | -2.78508100 | -4.49242900 |
| H                   | -3.05615300 | -1.53787900 | -4.73759400 |
| H                   | -3.68687600 | -4.17123000 | 3.30288600  |
| H                   | -5.06056000 | -5.26639200 | 3.19372000  |
| H                   | -3.45566700 | -4.49349800 | -4.24489200 |
| H                   | -4.38534800 | -3.39552600 | -5.24658400 |
| O                   | 9.25836600  | -0.34508400 | 0.07495300  |
| C                   | 10.56930600 | -0.88593700 | 0.03526700  |
| C                   | 8.28004400  | -1.28418100 | 0.47181600  |
| C                   | 11.54115100 | 0.15136500  | -0.47786600 |
| H                   | 10.57967800 | -1.77574900 | -0.62054500 |
| H                   | 10.87380300 | -1.22896000 | 1.03810500  |
| C                   | 6.92765300  | -0.57988200 | 0.49730400  |
| H                   | 8.25944100  | -2.13962600 | -0.22722100 |
| H                   | 8.51884900  | -1.69106700 | 1.47036000  |
| C                   | 12.85090100 | 0.19187200  | 0.01270500  |
| C                   | 11.16206200 | 1.05488300  | -1.47823800 |
| C                   | 5.77776000  | -1.50349900 | 0.91628000  |
| H                   | 6.99619300  | 0.27408300  | 1.18405900  |
| H                   | 6.73448200  | -0.16264600 | -0.50009700 |
| C                   | 13.77206100 | 1.11126100  | -0.49281100 |
| H                   | 13.15322700 | -0.49838000 | 0.79758100  |
| C                   | 12.07872100 | 1.98028200  | -1.97781200 |
| H                   | 10.14218300 | 1.03543200  | -1.84917900 |
| C                   | 4.42387600  | -0.75885100 | 0.97243700  |
| H                   | 5.98823200  | -1.94179800 | 1.90040900  |
| H                   | 5.70781200  | -2.34782100 | 0.21799900  |
| C                   | 13.38743300 | 2.00923500  | -1.48976900 |
| H                   | 14.78561800 | 1.13115000  | -0.10137200 |
| H                   | 11.77160600 | 2.68037300  | -2.75058300 |
| H                   | 4.22654000  | -0.29716600 | 0.00265100  |
| H                   | 4.52134800  | 0.07326100  | 1.68164800  |
| H                   | 14.10084400 | 2.72956000  | -1.88086600 |
| T <sub>S1d</sub> -3 |             |             |             |
| C                   | -1.76033300 | -3.26729000 | 0.86243200  |
| C                   | -2.41988000 | -2.78202400 | -0.44917300 |
| C                   | -0.80402800 | -1.97466200 | -1.16766900 |
| C                   | -2.40577400 | -3.72879000 | -1.48605000 |
| C                   | -0.09862300 | -1.75021700 | -0.07511600 |
| C                   | -0.65097800 | -2.26099200 | 1.23364100  |
| C                   | -2.69966900 | -3.80839900 | 1.98821800  |
| C                   | -1.92566800 | -4.81377600 | 2.86368300  |

|    |             |             |             |
|----|-------------|-------------|-------------|
| C  | -3.40409100 | -2.78569600 | 2.90066600  |
| C  | -3.12548800 | -3.69172600 | -2.72897900 |
| C  | -2.98560800 | -4.67456400 | -3.64429800 |
| C  | -0.76420900 | -1.67754000 | -2.58632900 |
| C  | 0.31910300  | -1.83508700 | -3.35944000 |
| O  | -1.18300400 | -1.12766400 | 1.96192700  |
| C  | -0.43617500 | -0.64872500 | 2.99776500  |
| C  | -1.10093000 | 0.54299500  | 3.63604500  |
| O  | 0.62376900  | -1.12887900 | 3.33435600  |
| H  | -1.17679100 | -4.14751700 | 0.56135400  |
| H  | -1.74231300 | -4.58446800 | -1.36417300 |
| H  | 0.11737100  | -2.71904500 | 1.85826200  |
| H  | -3.48085900 | -4.37796700 | 1.46582200  |
| H  | -2.58926700 | -5.25254100 | 3.61648400  |
| H  | -1.50671300 | -5.63496000 | 2.27026200  |
| H  | -1.10155800 | -4.32715300 | 3.39967700  |
| H  | -4.20149400 | -3.29364300 | 3.45495700  |
| H  | -3.85257200 | -1.94982400 | 2.35978000  |
| H  | -2.71307700 | -2.36840300 | 3.63813500  |
| H  | -3.80924600 | -2.87063300 | -2.92228800 |
| H  | -3.54736800 | -4.67296400 | -4.57328800 |
| H  | -2.31333100 | -5.51342400 | -3.48071700 |
| H  | -1.68162300 | -1.29213500 | -3.02865600 |
| H  | 0.30398500  | -1.54460300 | -4.40559400 |
| H  | 1.24805500  | -2.23551200 | -2.96498200 |
| H  | -0.95026300 | 1.41682000  | 2.99195900  |
| H  | -0.64592500 | 0.73315500  | 4.60908300  |
| H  | -2.17755000 | 0.38523800  | 3.74192500  |
| Au | 1.71223300  | -0.69744900 | -0.11559300 |
| H  | -2.14930100 | 5.61936700  | 0.04241000  |
| C  | -2.75972100 | 4.73043200  | -0.14873100 |
| C  | -2.21902300 | 3.50724700  | 0.61867200  |
| H  | -2.75955700 | 4.55011600  | -1.23035500 |
| H  | -3.78979700 | 4.95184700  | 0.15362200  |
| C  | -0.76065300 | 3.23960200  | 0.27009800  |
| C  | -3.11745500 | 2.27799300  | 0.39374300  |
| H  | -2.25451900 | 3.75094300  | 1.68951600  |
| C  | -0.36998100 | 2.79468900  | -0.99333200 |
| C  | 0.25485400  | 3.51203100  | 1.17925700  |
| H  | -4.14245400 | 2.48720100  | 0.72125500  |
| H  | -2.74781700 | 1.40917800  | 0.94967000  |
| H  | -3.16120700 | 2.00474200  | -0.66734400 |
| C  | 0.97112900  | 2.64261900  | -1.36768800 |
| H  | -1.13208200 | 2.61283400  | -1.74771000 |

|   |             |             |             |
|---|-------------|-------------|-------------|
| C | 1.62301900  | 3.34731300  | 0.89406900  |
| H | -0.01988800 | 3.91283800  | 2.15332400  |
| C | 1.14938000  | 2.38358800  | -2.87916100 |
| C | 1.99407700  | 2.87973100  | -0.39729000 |
| C | 2.51726800  | 3.78573300  | 2.07972900  |
| H | 0.21353100  | 1.89288200  | -3.17646100 |
| C | 1.19661500  | 3.71666200  | -3.65974300 |
| C | 2.26370200  | 1.44604800  | -3.36248300 |
| C | 3.43736700  | 2.85627500  | -0.84667600 |
| C | 4.00067000  | 4.11809000  | 1.85640900  |
| C | 2.35183100  | 2.81642500  | 3.27399200  |
| H | 2.06768700  | 4.73365000  | 2.40748500  |
| H | 1.13959500  | 3.52481700  | -4.73807400 |
| H | 0.36122500  | 4.36952800  | -3.38602000 |
| H | 2.12836900  | 4.25831600  | -3.46928500 |
| H | 2.07561100  | 1.18614700  | -4.41171200 |
| H | 2.27829200  | 0.51626700  | -2.78657700 |
| H | 3.25538900  | 1.90051100  | -3.31494000 |
| C | 3.89396700  | 4.06431900  | -1.40649900 |
| C | 4.34641000  | 1.76529700  | -0.79098300 |
| H | 4.40859500  | 4.51162400  | 2.79470500  |
| H | 4.13939500  | 4.88461200  | 1.09070600  |
| H | 4.60741000  | 3.25429000  | 1.57355600  |
| H | 1.31094400  | 2.76282100  | 3.60649100  |
| H | 2.65794200  | 1.79687200  | 3.02233700  |
| H | 2.95545600  | 3.15332100  | 4.12477200  |
| C | 5.18490300  | 4.22705800  | -1.90043200 |
| H | 3.20196800  | 4.90018300  | -1.44080000 |
| C | 5.65081100  | 1.95037700  | -1.29352700 |
| P | 3.96757700  | 0.09189500  | -0.07694500 |
| C | 6.07465500  | 3.15767700  | -1.84244600 |
| H | 5.48976900  | 5.17984500  | -2.32367100 |
| H | 6.36000200  | 1.13135500  | -1.27146400 |
| C | 5.02003200  | -1.13960100 | -1.04191400 |
| C | 4.65563600  | 0.18501100  | 1.67639400  |
| H | 7.08829700  | 3.25439100  | -2.21999500 |
| C | 4.76645300  | -1.07865100 | -2.56405500 |
| C | 4.81322100  | -2.58875000 | -0.54058600 |
| H | 6.06833800  | -0.87304200 | -0.85132000 |
| C | 6.20904000  | 0.29909200  | 1.79862400  |
| C | 4.07385400  | -0.89527800 | 2.62296800  |
| H | 4.23629000  | 1.13992800  | 2.00455900  |
| C | 5.67286800  | -2.06301600 | -3.32351600 |
| H | 3.71520200  | -1.33536500 | -2.75479600 |

|   |              |             |             |
|---|--------------|-------------|-------------|
| H | 4.91586000   | -0.06492100 | -2.94679200 |
| C | 5.71797000   | -3.57597900 | -1.29948700 |
| H | 5.01639000   | -2.66712800 | 0.53031900  |
| H | 3.76020300   | -2.87048200 | -0.68204700 |
| C | 6.84841200   | -0.95932600 | 2.40353200  |
| H | 6.68025000   | 0.53750100  | 0.84039100  |
| H | 6.43350900   | 1.15395100  | 2.44908500  |
| C | 4.81527300   | -0.85603000 | 3.96863900  |
| H | 4.16620200   | -1.89867100 | 2.19261300  |
| H | 3.00269200   | -0.72560500 | 2.76883600  |
| C | 5.50181500   | -3.50094600 | -2.81581500 |
| H | 5.45343000   | -2.00480700 | -4.39663600 |
| H | 6.72184900   | -1.75547500 | -3.20416900 |
| H | 5.52990200   | -4.59284200 | -0.93380800 |
| H | 6.76955400   | -3.35222000 | -1.06850500 |
| C | 6.30362000   | -1.25568900 | 3.81878300  |
| H | 6.66034800   | -1.81619300 | 1.74420500  |
| H | 7.93741400   | -0.83817900 | 2.43439600  |
| H | 4.31256900   | -1.51290900 | 4.68688700  |
| H | 4.73801900   | 0.15941200  | 4.38055300  |
| H | 4.48699000   | -3.85214000 | -3.05581300 |
| H | 6.19562800   | -4.17383900 | -3.33355400 |
| H | 6.43056700   | -2.32318500 | 4.03501400  |
| H | 6.90116700   | -0.71941300 | 4.56563400  |
| O | -8.19500400  | -0.29778300 | -0.18921300 |
| C | -9.57800700  | -0.58837500 | -0.04125600 |
| C | -7.37510700  | -1.44334600 | -0.11526200 |
| C | -10.38013400 | 0.69137800  | -0.07134100 |
| H | -9.73866000  | -1.12054700 | 0.91380000  |
| H | -9.91385200  | -1.26660100 | -0.84304400 |
| C | -5.92533400  | -0.99573200 | -0.27676000 |
| H | -7.51491400  | -1.96151500 | 0.85035400  |
| H | -7.64506100  | -2.16392600 | -0.90830700 |
| C | -11.64526100 | 0.71413600  | -0.66833900 |
| C | -9.89174900  | 1.85709300  | 0.53168900  |
| C | -4.93376500  | -2.16629400 | -0.26481800 |
| H | -5.84015000  | -0.43730900 | -1.21816000 |
| H | -5.68560200  | -0.28872000 | 0.52783000  |
| C | -12.41682800 | 1.87775400  | -0.65610800 |
| H | -12.03046000 | -0.18306500 | -1.14838900 |
| C | -10.65731100 | 3.02321400  | 0.53588200  |
| H | -8.90474400  | 1.84617800  | 0.98346200  |
| C | -3.47840700  | -1.67684100 | -0.43799600 |
| H | -5.18853600  | -2.87050300 | -1.06767800 |

|      |              |             |             |
|------|--------------|-------------|-------------|
| H    | -5.03472700  | -2.72617100 | 0.67094500  |
| C    | -11.92350900 | 3.03649500  | -0.05453100 |
| H    | -13.39763300 | 1.88034600  | -1.12383300 |
| H    | -10.26610000 | 3.92360400  | 1.00244900  |
| H    | -3.22633700  | -0.96643600 | 0.35291700  |
| H    | -3.41994000  | -1.10911600 | -1.37543800 |
| H    | -12.51960600 | 3.94491600  | -0.04854900 |
| 2d-3 |              |             |             |
| C    | -1.78552000  | -3.17759100 | 0.95416200  |
| C    | -2.36128300  | -2.65731800 | -0.41138800 |
| C    | -0.95371900  | -1.99496200 | -1.05603200 |
| C    | -2.40303800  | -3.71002900 | -1.38895500 |
| C    | -0.10221400  | -1.74494300 | -0.03556400 |
| C    | -0.61531700  | -2.23672500 | 1.29595400  |
| C    | -2.76886800  | -3.63473800 | 2.07133600  |
| C    | -2.05700200  | -4.64226400 | 2.99628000  |
| C    | -3.44215700  | -2.54999700 | 2.93502900  |
| C    | -3.13476200  | -3.75129400 | -2.61446200 |
| C    | -3.00784900  | -4.80620200 | -3.45483100 |
| C    | -0.88031200  | -1.63795000 | -2.47530100 |
| C    | 0.21939300   | -1.70972600 | -3.23527400 |
| O    | -1.05875700  | -1.08019700 | 2.05017200  |
| C    | -0.28968200  | -0.69532600 | 3.10807900  |
| C    | -0.86523700  | 0.52781000  | 3.77391500  |
| O    | 0.72127900   | -1.27199200 | 3.44449600  |
| H    | -1.25590500  | -4.10045500 | 0.68096600  |
| H    | -1.73746100  | -4.55580200 | -1.22005100 |
| H    | 0.15249900   | -2.73653400 | 1.88951300  |
| H    | -3.56524600  | -4.18782700 | 1.55373400  |
| H    | -2.75161400  | -5.02212700 | 3.75318300  |
| H    | -1.66772500  | -5.50322600 | 2.43995700  |
| H    | -1.21871300  | -4.17461800 | 3.52690700  |
| H    | -4.28301100  | -2.99613000 | 3.47826100  |
| H    | -3.82547200  | -1.70475300 | 2.35978600  |
| H    | -2.75000300  | -2.15141900 | 3.68138100  |
| H    | -3.81899100  | -2.94490900 | -2.85844100 |
| H    | -3.58471900  | -4.87750700 | -4.37202600 |
| H    | -2.33106600  | -5.62890100 | -3.23667200 |
| H    | -1.80646600  | -1.28961500 | -2.93230900 |
| H    | 0.20565300   | -1.38715200 | -4.27190700 |
| H    | 1.16146000   | -2.08025900 | -2.84235800 |
| H    | -0.70649400  | 1.39509200  | 3.12329100  |
| H    | -0.36129700  | 0.69248100  | 4.72711600  |
| H    | -1.94272900  | 0.41912400  | 3.92733500  |

|    |             |             |             |
|----|-------------|-------------|-------------|
| Au | 1.68413000  | -0.70123500 | -0.12791100 |
| H  | -2.10331500 | 5.62297800  | 0.23310600  |
| C  | -2.71891300 | 4.73147100  | 0.07306800  |
| C  | -2.13958800 | 3.51298300  | 0.81918700  |
| H  | -2.76806500 | 4.54759500  | -1.00683300 |
| H  | -3.73471100 | 4.95088100  | 0.42175100  |
| C  | -0.69682200 | 3.24887200  | 0.40867500  |
| C  | -3.04042200 | 2.27820900  | 0.63661200  |
| H  | -2.12950800 | 3.75911900  | 1.88994000  |
| C  | -0.35850600 | 2.81284400  | -0.87263900 |
| C  | 0.35477600  | 3.51272800  | 1.27855300  |
| H  | -4.05290400 | 2.48503800  | 1.00278600  |
| H  | -2.64481800 | 1.41447000  | 1.18265500  |
| H  | -3.12314400 | 1.99921700  | -0.42067100 |
| C  | 0.96627600  | 2.65837800  | -1.30031100 |
| H  | -1.15056000 | 2.63817900  | -1.59716800 |
| C  | 1.70981900  | 3.34340600  | 0.93939200  |
| H  | 0.11977900  | 3.90979400  | 2.26446000  |
| C  | 1.08491300  | 2.41185300  | -2.81965900 |
| C  | 2.02712800  | 2.88150800  | -0.36842200 |
| C  | 2.65204800  | 3.77325000  | 2.09103200  |
| H  | 0.14292700  | 1.91326100  | -3.08241300 |
| C  | 1.08800300  | 3.75288100  | -3.58845200 |
| C  | 2.18825100  | 1.49142900  | -3.35783400 |
| C  | 3.45186000  | 2.84503500  | -0.87158700 |
| C  | 4.13033600  | 4.08698300  | 1.81335600  |
| C  | 2.52079800  | 2.80816500  | 3.29296700  |
| H  | 2.22546700  | 4.72675300  | 2.43320600  |
| H  | 0.99354100  | 3.57054800  | -4.66582900 |
| H  | 0.25654900  | 4.39427700  | -3.27811000 |
| H  | 2.02030400  | 4.30334200  | -3.42717200 |
| H  | 1.95852100  | 1.23871600  | -4.40051600 |
| H  | 2.23645400  | 0.55687300  | -2.79215600 |
| H  | 3.17618500  | 1.95650700  | -3.34783800 |
| C  | 3.90311600  | 4.05072200  | -1.44039800 |
| C  | 4.34659700  | 1.74099800  | -0.85702500 |
| H  | 4.57846900  | 4.47177400  | 2.73685700  |
| H  | 4.25100500  | 4.85427500  | 1.04545100  |
| H  | 4.71414000  | 3.21597400  | 1.50534600  |
| H  | 1.49299800  | 2.76609900  | 3.66521400  |
| H  | 2.80764100  | 1.78536600  | 3.03165300  |
| H  | 3.15954300  | 3.14001100  | 4.11968700  |
| C  | 5.17716400  | 4.19942900  | -1.98048100 |
| H  | 3.22129000  | 4.89567000  | -1.44485700 |

|   |              |             |             |
|---|--------------|-------------|-------------|
| C | 5.63428000   | 1.91247900  | -1.40480900 |
| P | 3.96174900   | 0.06676400  | -0.14601800 |
| C | 6.05403400   | 3.11805100  | -1.96092600 |
| H | 5.47913400   | 5.15058000  | -2.40946500 |
| H | 6.33286400   | 1.08413800  | -1.41378600 |
| C | 4.97340400   | -1.16846200 | -1.15042000 |
| C | 4.70152900   | 0.13854200  | 1.58745600  |
| H | 7.05472100   | 3.20412200  | -2.37403400 |
| C | 4.67383700   | -1.09339100 | -2.66371300 |
| C | 4.76768000   | -2.61915200 | -0.65299100 |
| H | 6.03006000   | -0.91449000 | -0.99115900 |
| C | 6.25818500   | 0.24087700  | 1.66779500  |
| C | 4.13937200   | -0.94565800 | 2.54178000  |
| H | 4.29920100   | 1.09398500  | 1.93485200  |
| C | 5.54461500   | -2.08201300 | -3.45851900 |
| H | 3.61433400   | -1.33574600 | -2.82463400 |
| H | 4.82386400   | -0.07853100 | -3.04309800 |
| C | 5.63800500   | -3.60946200 | -1.44732400 |
| H | 5.00435300   | -2.70658200 | 0.41031500  |
| H | 3.70807100   | -2.89025500 | -0.76204000 |
| C | 6.90644600   | -1.03112000 | 2.23354200  |
| H | 6.70401200   | 0.49350600  | 0.70104600  |
| H | 6.50622100   | 1.08312700  | 2.32622000  |
| C | 4.92439200   | -0.93025300 | 3.86299100  |
| H | 4.20548400   | -1.94525600 | 2.09811300  |
| H | 3.07567900   | -0.76669800 | 2.72637100  |
| C | 5.37410200   | -3.52160900 | -2.95544700 |
| H | 5.29184000   | -2.01371200 | -4.52370100 |
| H | 6.60023600   | -1.78674400 | -3.37037700 |
| H | 5.45234100   | -4.62722600 | -1.08277100 |
| H | 6.69859400   | -3.39702700 | -1.24916400 |
| C | 6.40176400   | -1.34607300 | 3.65971900  |
| H | 6.69245100   | -1.87592600 | 1.56673800  |
| H | 7.99675700   | -0.91802400 | 2.23362300  |
| H | 4.43717900   | -1.58908500 | 4.59002500  |
| H | 4.87360000   | 0.08146400  | 4.28800500  |
| H | 4.34833800   | -3.86017600 | -3.16512000 |
| H | 6.04375100   | -4.19817500 | -3.49965800 |
| H | 6.52081400   | -2.41887600 | 3.85320900  |
| H | 7.02909200   | -0.83109700 | 4.39710100  |
| O | -8.21904100  | -0.30269800 | -0.24985000 |
| C | -9.59641500  | -0.59665100 | -0.06089400 |
| C | -7.38371400  | -1.43163400 | -0.11826900 |
| C | -10.41002300 | 0.67342900  | -0.14613900 |



|                               |              |             |             |
|-------------------------------|--------------|-------------|-------------|
| H                             | -9.73471900  | -1.07632700 | 0.92495000  |
| H                             | -9.94034000  | -1.32081500 | -0.81781600 |
| C                             | -5.94247500  | -0.97313500 | -0.31972100 |
| H                             | -7.50689400  | -1.89429100 | 0.87737100  |
| H                             | -7.65141600  | -2.20094800 | -0.86514400 |
| C                             | -9.92533800  | 1.87111100  | 0.39416500  |
| C                             | -11.68082700 | 0.65728100  | -0.73103500 |
| C                             | -4.92690200  | -2.12065400 | -0.23521600 |
| H                             | -5.87217300  | -0.47586100 | -1.29604100 |
| H                             | -5.71198800  | -0.21013200 | 0.43493400  |
| C                             | -10.70006000 | 3.03022700  | 0.34899600  |
| H                             | -8.93384600  | 1.89019300  | 0.83578500  |
| C                             | -12.46151900 | 1.81434700  | -0.76808600 |
| H                             | -12.06341200 | -0.26522100 | -1.16275400 |
| C                             | -3.48641600  | -1.60470500 | -0.42856100 |
| H                             | -5.16615500  | -2.87492500 | -0.99709800 |
| H                             | -5.02582900  | -2.62668000 | 0.73025900  |
| C                             | -11.97189600 | 3.00484900  | -0.22882800 |
| H                             | -10.31158400 | 3.95531900  | 0.76697300  |
| H                             | -13.44675900 | 1.78670800  | -1.22556700 |
| H                             | -3.24980900  | -0.85819400 | 0.33486400  |
| H                             | -3.44557200  | -1.06362400 | -1.38266700 |
| H                             | -12.57528400 | 3.90787900  | -0.26136400 |
| T <sub>S<sub>2d-3</sub></sub> |              |             |             |
| C                             | -2.16176400  | -2.25133100 | 2.31503400  |
| C                             | -2.65562100  | -2.14529500 | 0.82837200  |
| C                             | -1.68243200  | -1.16019000 | 0.13274200  |
| C                             | -1.85524900  | -3.14830700 | 0.03589800  |
| C                             | -0.47113900  | -1.09824900 | 0.84880800  |
| C                             | -0.66303900  | -1.78047500 | 2.20063200  |
| C                             | -3.08949500  | -1.69525900 | 3.43361700  |
| C                             | -2.72869400  | -2.33307800 | 4.78964300  |
| C                             | -3.23830500  | -0.16918500 | 3.59023900  |
| C                             | -4.16123300  | -2.11437100 | 0.51202500  |
| C                             | -2.10788500  | -3.64172700 | -1.29307000 |
| C                             | -1.39835400  | -4.66999100 | -1.80270000 |
| C                             | -1.99959000  | -0.47841800 | -1.12496400 |
| C                             | -1.44152900  | 0.67365100  | -1.52021100 |
| O                             | -0.15486200  | -1.00727100 | 3.31493200  |
| C                             | -0.18559200  | 0.34189500  | 3.23864800  |
| C                             | 0.37849900   | 0.97201500  | 4.48612500  |
| O                             | -0.61658000  | 0.94428100  | 2.27638300  |
| H                             | -2.12727600  | -3.32580800 | 2.53580400  |
| H                             | -1.02758100  | -3.62878500 | 0.54941500  |

|    |             |             |             |
|----|-------------|-------------|-------------|
| H  | -0.00800500 | -2.65649800 | 2.24378700  |
| H  | -4.07984800 | -2.08814900 | 3.16874700  |
| H  | -3.43158800 | -2.00260300 | 5.56230900  |
| H  | -2.77527500 | -3.42770600 | 4.74668600  |
| H  | -1.72041800 | -2.04977400 | 5.10933300  |
| H  | -4.20385800 | 0.05401900  | 4.05787800  |
| H  | -3.18609300 | 0.37605200  | 2.64595500  |
| H  | -2.47419700 | 0.24440400  | 4.25377100  |
| H  | -4.30110400 | -2.43460400 | -0.52627300 |
| H  | -4.64481800 | -2.89605100 | 1.11321000  |
| H  | -2.92116100 | -3.22085800 | -1.87505400 |
| H  | -1.63298600 | -5.09349700 | -2.77416000 |
| H  | -0.58257100 | -5.13116000 | -1.25123700 |
| H  | -2.79934000 | -0.90399600 | -1.72600500 |
| H  | -1.76078300 | 1.15052000  | -2.44223600 |
| H  | -0.68450000 | 1.18521400  | -0.93451400 |
| H  | -0.19411400 | 0.65248400  | 5.36278100  |
| H  | 0.34146400  | 2.05736300  | 4.39276300  |
| H  | 1.41221900  | 0.64361900  | 4.63337800  |
| H  | 6.49379700  | 3.55881500  | -3.33719400 |
| C  | 5.93180400  | 2.76749200  | -2.84950400 |
| C  | 4.84095800  | 3.08172400  | -2.04508300 |
| C  | 6.29171300  | 1.43271700  | -3.01607300 |
| C  | 4.06699100  | 2.10746100  | -1.38462300 |
| H  | 4.56781600  | 4.12283000  | -1.90580100 |
| C  | 5.55588200  | 0.44743500  | -2.36461100 |
| H  | 7.13658200  | 1.15553400  | -3.63954800 |
| C  | 2.90774100  | 2.67357500  | -0.59316400 |
| C  | 4.44632100  | 0.74650000  | -1.54604300 |
| H  | 5.86174100  | -0.58289100 | -2.50144400 |
| C  | 1.71485700  | 3.04738900  | -1.28707100 |
| C  | 3.05983700  | 3.07326000  | 0.76356100  |
| P  | 3.65795900  | -0.71926100 | -0.71754100 |
| C  | 0.70257400  | 3.71906900  | -0.58868500 |
| C  | 1.42453500  | 2.91825600  | -2.79702200 |
| C  | 2.00468000  | 3.75973100  | 1.38896600  |
| C  | 4.27416600  | 2.89695300  | 1.70183700  |
| Au | 1.40588100  | -0.64271900 | 0.14006300  |
| C  | 3.68692900  | -2.11101000 | -1.98856100 |
| C  | 4.90066800  | -1.18164700 | 0.63335400  |
| C  | 0.81672000  | 4.09282400  | 0.75037700  |
| H  | -0.19331900 | 3.99993000  | -1.13783800 |
| H  | 0.32970800  | 2.96504300  | -2.86076300 |
| C  | 1.93403400  | 4.14623700  | -3.58452100 |

|   |             |             |             |
|---|-------------|-------------|-------------|
| C | 1.81397200  | 1.61820900  | -3.51115600 |
| H | 2.14270900  | 4.07829900  | 2.42094300  |
| C | 5.68656700  | 2.74716900  | 1.11526200  |
| C | 3.98118100  | 1.80248700  | 2.75226800  |
| H | 4.31105000  | 3.83974000  | 2.26383700  |
| C | 2.82056300  | -1.78810400 | -3.22337500 |
| C | 3.25551200  | -3.45681300 | -1.36143300 |
| H | 4.72429600  | -2.22301400 | -2.32620900 |
| C | 6.24082900  | -1.79252200 | 0.13539100  |
| C | 4.31113500  | -2.02958200 | 1.78222200  |
| H | 5.12997900  | -0.19878200 | 1.05775500  |
| C | -0.25845200 | 4.90288600  | 1.46137500  |
| H | 1.53121200  | 4.12977000  | -4.60437000 |
| H | 1.61858300  | 5.08157600  | -3.11039000 |
| H | 3.02514500  | 4.15276700  | -3.66111500 |
| H | 1.31811200  | 1.58347900  | -4.48888500 |
| H | 1.48932200  | 0.74218900  | -2.94199400 |
| H | 2.88869300  | 1.53911200  | -3.68894900 |
| H | 6.40972600  | 2.79406900  | 1.93808700  |
| H | 5.92424700  | 3.55809900  | 0.42167500  |
| H | 5.85021800  | 1.80476100  | 0.58748800  |
| H | 3.10321400  | 2.06306600  | 3.35192600  |
| H | 3.77434800  | 0.83654100  | 2.28214700  |
| H | 4.83128800  | 1.68062500  | 3.43438900  |
| C | 2.85504200  | -2.93140800 | -4.25209700 |
| H | 1.78290700  | -1.62263000 | -2.90060300 |
| H | 3.15909300  | -0.86021300 | -3.69293100 |
| C | 3.28301200  | -4.59382200 | -2.39914000 |
| H | 3.90448900  | -3.72164600 | -0.52105800 |
| H | 2.23926000  | -3.35337000 | -0.95409400 |
| C | 7.00023500  | -2.52243400 | 1.27297700  |
| H | 6.07708000  | -2.50226000 | -0.68283800 |
| H | 6.86569200  | -0.98881900 | -0.26838500 |
| C | 5.24483800  | -1.98886400 | 3.01936300  |
| H | 4.18588000  | -3.06555700 | 1.44795500  |
| H | 3.31138400  | -1.67480200 | 2.05747800  |
| C | -0.28925700 | 6.35392800  | 0.93963800  |
| C | -1.65052700 | 4.25276200  | 1.37447500  |
| H | 0.02148500  | 4.94264000  | 2.52335500  |
| C | 2.42922200  | -4.26773000 | -3.63048600 |
| H | 2.20745700  | -2.67661600 | -5.09970700 |
| H | 3.87324500  | -3.02640100 | -4.65633800 |
| H | 2.94318800  | -5.52444200 | -1.92733100 |
| H | 4.32159500  | -4.76976200 | -2.71412300 |

|      |              |             |             |
|------|--------------|-------------|-------------|
| C    | 6.73825500   | -1.86819300 | 2.63363700  |
| H    | 6.68482300   | -3.57340100 | 1.31511000  |
| H    | 8.07132500   | -2.53363100 | 1.04237600  |
| H    | 5.08275000   | -2.90061300 | 3.60671100  |
| H    | 4.96381500   | -1.15005000 | 3.66692700  |
| H    | 0.68907600   | 6.83583200  | 1.04326900  |
| H    | -0.56789000  | 6.38643200  | -0.12051700 |
| H    | -1.02303500  | 6.94807800  | 1.49656800  |
| H    | -2.37593100  | 4.83219300  | 1.95755900  |
| H    | -1.62967200  | 3.22887200  | 1.75924700  |
| H    | -2.01485600  | 4.22201300  | 0.34036400  |
| H    | 1.37010400   | -4.20848500 | -3.33548800 |
| H    | 2.50440300   | -5.07451300 | -4.36932600 |
| H    | 7.36526100   | -2.32373600 | 3.40781700  |
| H    | 7.03285500   | -0.81101600 | 2.58673100  |
| C    | -4.91762100  | -0.78490100 | 0.68111900  |
| H    | -5.03202300  | -0.53969600 | 1.74072700  |
| H    | -4.33531100  | 0.03220700  | 0.23557800  |
| C    | -6.30322100  | -0.84197700 | 0.02224300  |
| H    | -6.20322200  | -1.05910800 | -1.04978800 |
| H    | -6.89518600  | -1.66232300 | 0.45055500  |
| C    | -7.08927300  | 0.46291600  | 0.16699900  |
| H    | -7.28810600  | 0.67240900  | 1.22834500  |
| H    | -6.49817800  | 1.30478400  | -0.22392100 |
| O    | -8.29802200  | 0.38221600  | -0.57182400 |
| C    | -9.48586700  | 0.50051200  | 0.19989800  |
| H    | -9.55267500  | -0.31308700 | 0.94069200  |
| H    | -9.46620300  | 1.44800100  | 0.76598800  |
| C    | -10.69187300 | 0.46902600  | -0.71033600 |
| C    | -11.88591200 | -0.11661700 | -0.27535000 |
| C    | -10.64858600 | 1.06481900  | -1.97688200 |
| C    | -13.02330500 | -0.09875900 | -1.08489300 |
| H    | -11.92811200 | -0.59154000 | 0.70279400  |
| C    | -11.78167400 | 1.07476700  | -2.79064900 |
| H    | -9.71955100  | 1.50659800  | -2.32278100 |
| C    | -12.97342700 | 0.49691800  | -2.34621500 |
| H    | -13.94371000 | -0.55726200 | -0.73344300 |
| H    | -11.73500300 | 1.53582900  | -3.77382500 |
| H    | -13.85560800 | 0.50733000  | -2.98050500 |
| 3d-3 |              |             |             |
| C    | -2.08162200  | -2.09829800 | 2.27411600  |
| C    | -2.57897100  | -1.86139400 | 0.82017200  |
| C    | -1.59403400  | -0.94312200 | 0.07730100  |
| C    | -1.56813700  | -2.44845000 | -0.18523300 |

|    |             |             |             |
|----|-------------|-------------|-------------|
| C  | -0.45967300 | -0.57930300 | 1.01047300  |
| C  | -0.66888700 | -1.42336400 | 2.29895600  |
| C  | -3.06811400 | -1.80044200 | 3.44441700  |
| C  | -2.61641400 | -2.50556200 | 4.73664000  |
| C  | -3.41747300 | -0.32562600 | 3.74125600  |
| C  | -1.95290500 | -3.06961500 | -1.47612000 |
| C  | -1.43677500 | -4.22317200 | -1.91399000 |
| C  | -1.99265600 | 0.06805100  | -0.94843200 |
| C  | -1.67819900 | 0.03433000  | -2.24550500 |
| O  | -0.49601200 | -0.41464900 | 3.38248100  |
| C  | -0.63708900 | 0.76727100  | 2.87246300  |
| C  | -0.58593400 | 1.97440600  | 3.73340700  |
| O  | -0.77145700 | 0.83531200  | 1.61407400  |
| H  | -1.89138800 | -3.17597800 | 2.36540400  |
| H  | -0.72812100 | -2.97753400 | 0.26913400  |
| H  | 0.13220000  | -2.13239800 | 2.48905500  |
| H  | -3.99684000 | -2.29298800 | 3.13164200  |
| H  | -3.36483600 | -2.37194100 | 5.52556800  |
| H  | -2.48723500 | -3.58291900 | 4.58260000  |
| H  | -1.66908400 | -2.09992100 | 5.11116700  |
| H  | -4.41454000 | -0.26292600 | 4.18992300  |
| H  | -3.43087700 | 0.30151700  | 2.84380700  |
| H  | -2.72596500 | 0.11154000  | 4.46795100  |
| H  | -2.68997700 | -2.55892200 | -2.08831200 |
| H  | -1.74746600 | -4.66060000 | -2.85790500 |
| H  | -0.69642900 | -4.77822700 | -1.34119300 |
| H  | -2.55866600 | 0.91696000  | -0.56632400 |
| H  | -1.99532200 | 0.82554000  | -2.91934400 |
| H  | -1.10316800 | -0.77735500 | -2.68122400 |
| H  | -1.51180400 | 2.54626800  | 3.61674300  |
| H  | 0.23953500  | 2.60731100  | 3.38967900  |
| H  | -0.44624000 | 1.69534700  | 4.77782700  |
| Au | 1.50714800  | -0.50436800 | 0.24457400  |
| H  | 0.98953600  | 6.85639500  | 0.91709900  |
| C  | -0.01575500 | 6.48858900  | 0.68656200  |
| C  | -0.19711400 | 5.02833000  | 1.15211800  |
| H  | -0.16286100 | 6.57150900  | -0.39671300 |
| H  | -0.74185200 | 7.14638100  | 1.17826400  |
| C  | 0.86706700  | 4.13348900  | 0.52735300  |
| C  | -1.63692100 | 4.55380800  | 0.89139600  |
| H  | -0.03237600 | 5.01417800  | 2.23988700  |
| C  | 0.73904600  | 3.59646300  | -0.75204300 |
| C  | 2.07117900  | 3.89902200  | 1.18460900  |
| H  | -2.34670000 | 5.15978300  | 1.46577200  |

|   |             |             |             |
|---|-------------|-------------|-------------|
| H | -1.77467700 | 3.50202800  | 1.16806300  |
| H | -1.91000400 | 4.65443700  | -0.16509800 |
| C | 1.75999100  | 2.87428100  | -1.38553600 |
| H | -0.17336600 | 3.77837800  | -1.31355800 |
| C | 3.13393400  | 3.16710200  | 0.62568800  |
| H | 2.22090300  | 4.34582700  | 2.16712600  |
| C | 1.44458000  | 2.56079300  | -2.86231700 |
| C | 2.97510600  | 2.61907600  | -0.67852600 |
| C | 4.35779000  | 3.10872100  | 1.56734600  |
| H | 0.34811700  | 2.54097800  | -2.89818000 |
| C | 1.87854400  | 3.72069100  | -3.78636400 |
| C | 1.88781700  | 1.21373400  | -3.44426600 |
| C | 4.13739900  | 2.00569400  | -1.43198900 |
| C | 5.76501100  | 2.88975400  | 0.99070800  |
| C | 4.07662100  | 2.14239200  | 2.74092800  |
| H | 4.39744900  | 4.11133200  | 2.01424300  |
| H | 1.48351100  | 3.56246600  | -4.79692200 |
| H | 1.50382100  | 4.68342100  | -3.42273600 |
| H | 2.96808900  | 3.78629400  | -3.86376400 |
| H | 1.35251700  | 1.03831000  | -4.38544400 |
| H | 1.64353200  | 0.39239100  | -2.76450300 |
| H | 2.95597300  | 1.17724700  | -3.66746900 |
| C | 4.88648900  | 2.93552600  | -2.17856400 |
| C | 4.52724800  | 0.63926100  | -1.49851900 |
| H | 6.49411900  | 3.02311300  | 1.79850800  |
| H | 6.00046800  | 3.61810500  | 0.21049200  |
| H | 5.92014700  | 1.89423000  | 0.56888000  |
| H | 3.20731600  | 2.46997200  | 3.32178000  |
| H | 3.86434300  | 1.12943500  | 2.38651600  |
| H | 4.93434200  | 2.09723100  | 3.42237100  |
| C | 5.96518900  | 2.57126100  | -2.97904800 |
| H | 4.60135600  | 3.98114700  | -2.11701000 |
| C | 5.61746800  | 0.28911500  | -2.32177800 |
| P | 3.75243300  | -0.75445200 | -0.54667900 |
| C | 6.33168400  | 1.23048100  | -3.05749800 |
| H | 6.50860300  | 3.32850300  | -3.53681100 |
| H | 5.91695000  | -0.74887800 | -2.40708300 |
| C | 3.83979400  | -2.28054000 | -1.65028400 |
| C | 4.95995800  | -1.03371200 | 0.88364400  |
| H | 7.16248800  | 0.91440200  | -3.68131200 |
| C | 3.17124900  | -2.07052300 | -3.02538400 |
| C | 3.22488600  | -3.51809100 | -0.95359700 |
| H | 4.90532900  | -2.49127400 | -1.81205100 |
| C | 6.35457700  | -1.64100700 | 0.51741000  |

|   |              |             |             |
|---|--------------|-------------|-------------|
| C | 4.31660900   | -1.76374000 | 2.08963600  |
| H | 5.13577500   | -0.00464400 | 1.20935000  |
| C | 3.29973100   | -3.32584100 | -3.90594200 |
| H | 2.10716900   | -1.84521400 | -2.87285100 |
| H | 3.60622700   | -1.20965600 | -3.54139600 |
| C | 3.34799600   | -4.77360500 | -1.83586900 |
| H | 3.70814800   | -3.70718500 | 0.00930600  |
| H | 2.16434600   | -3.32078100 | -0.74336500 |
| C | 6.56898900   | -3.04047300 | 1.11415000  |
| H | 6.51960600   | -1.67162000 | -0.56281800 |
| H | 7.12980300   | -0.96980800 | 0.90767100  |
| C | 5.38243600   | -2.04554800 | 3.16054000  |
| H | 3.84611800   | -2.70512400 | 1.78520400  |
| H | 3.51260500   | -1.14298800 | 2.50213200  |
| C | 2.71441500   | -4.56540700 | -3.21694400 |
| H | 2.79953300   | -3.14706000 | -4.86533200 |
| H | 4.36085400   | -3.50111700 | -4.13595700 |
| H | 2.88158200   | -5.62335700 | -1.32211400 |
| H | 4.41110900   | -5.02869600 | -1.95430400 |
| C | 6.46350300   | -3.03328400 | 2.65341100  |
| H | 5.83074500   | -3.73456800 | 0.69273700  |
| H | 7.54891700   | -3.42215700 | 0.80544900  |
| H | 4.90587900   | -2.43376400 | 4.06789500  |
| H | 5.84748600   | -1.09215400 | 3.44556400  |
| H | 1.62799800   | -4.43721700 | -3.10276100 |
| H | 2.86267100   | -5.45476100 | -3.84076400 |
| H | 6.24165700   | -4.04858600 | 3.00241500  |
| H | 7.43304000   | -2.76502000 | 3.08931100  |
| H | -10.49917700 | -1.63661200 | -0.71147900 |
| C | -11.16741800 | -0.84954600 | -1.04548400 |
| C | -12.35442300 | -1.16346000 | -1.70863800 |
| C | -10.81570500 | 0.48630000  | -0.81880400 |
| C | -13.20754400 | -0.14739500 | -2.14519900 |
| H | -12.61421900 | -2.20415200 | -1.88424800 |
| C | -11.67051700 | 1.49987700  | -1.26654400 |
| C | -9.55724300  | 0.84008100  | -0.06004200 |
| H | -14.13218800 | -0.39346600 | -2.66012000 |
| C | -12.86287000 | 1.18678400  | -1.92127500 |
| H | -11.40186600 | 2.54199900  | -1.10514900 |
| O | -8.55171800  | -0.13026500 | -0.30247400 |
| H | -9.20355100  | 1.84147100  | -0.35853000 |
| H | -9.76602700  | 0.88858400  | 1.02447500  |
| H | -13.51644300 | 1.98447200  | -2.26404700 |
| C | -7.36257400  | 0.10672300  | 0.41971900  |

|                     |             |             |             |
|---------------------|-------------|-------------|-------------|
| C                   | -6.37570700 | -1.01000100 | 0.09601300  |
| H                   | -6.93510400 | 1.08830200  | 0.14522200  |
| H                   | -7.56883900 | 0.13889200  | 1.50498700  |
| C                   | -5.01456300 | -0.82230300 | 0.78107000  |
| H                   | -6.82100100 | -1.96779600 | 0.39536400  |
| H                   | -6.24668100 | -1.05159700 | -0.99317400 |
| C                   | -4.05977700 | -1.98805800 | 0.46008500  |
| H                   | -5.16983300 | -0.72816900 | 1.86042600  |
| H                   | -4.56765400 | 0.12295400  | 0.44499900  |
| H                   | -4.12962600 | -2.16509600 | -0.61663600 |
| H                   | -4.44533200 | -2.90887800 | 0.92107800  |
| Ts <sub>3d</sub> -3 |             |             |             |
| C                   | -2.04091700 | -2.49014300 | 2.03396900  |
| C                   | -2.55729100 | -2.13884700 | 0.60670400  |
| C                   | -1.56047900 | -1.17816900 | -0.06140300 |
| C                   | -1.58230600 | -2.70222700 | -0.42560000 |
| C                   | -0.40465900 | -0.97623600 | 0.82330900  |
| C                   | -0.60800800 | -1.84919300 | 2.07567600  |
| C                   | -3.00570800 | -2.28874800 | 3.23900700  |
| C                   | -2.54376000 | -3.12547300 | 4.44701000  |
| C                   | -3.32174300 | -0.84799700 | 3.68927900  |
| C                   | -1.95034100 | -3.17809600 | -1.77812000 |
| C                   | -1.38795200 | -4.25364100 | -2.34146100 |
| C                   | -1.92119000 | -0.10817600 | -1.03984600 |
| C                   | -1.59676600 | -0.07354800 | -2.33373000 |
| O                   | -0.32206200 | -1.00922600 | 3.24380600  |
| C                   | -0.51087400 | 0.27155100  | 2.98800100  |
| C                   | -0.27716600 | 1.21473500  | 4.12442500  |
| O                   | -0.83586000 | 0.62455000  | 1.84515200  |
| H                   | -1.86993400 | -3.57454200 | 2.02862300  |
| H                   | -0.76212700 | -3.28988300 | -0.01225700 |
| H                   | 0.16700800  | -2.61301300 | 2.13829200  |
| H                   | -3.94759600 | -2.73391200 | 2.89451600  |
| H                   | -3.27224800 | -3.05227500 | 5.26202100  |
| H                   | -2.44160400 | -4.18582300 | 4.18897800  |
| H                   | -1.57979100 | -2.77440600 | 4.83344500  |
| H                   | -4.30497500 | -0.81703100 | 4.17081100  |
| H                   | -3.33853400 | -0.12944900 | 2.86540500  |
| H                   | -2.60346600 | -0.50399500 | 4.43924400  |
| H                   | -2.71537500 | -2.63530200 | -2.32348500 |
| H                   | -1.69236900 | -4.60145800 | -3.32381100 |
| H                   | -0.61603500 | -4.83220700 | -1.83805500 |
| H                   | -2.46727100 | 0.72852800  | -0.60621400 |
| H                   | -1.88882500 | 0.76553600  | -2.95887900 |



|    |             |             |             |
|----|-------------|-------------|-------------|
| H  | -1.03741800 | -0.86979100 | -2.81558500 |
| H  | -0.33194400 | 2.24221400  | 3.76616100  |
| H  | 0.70835100  | 1.01833000  | 4.55843800  |
| H  | -1.02329100 | 1.05103300  | 4.90792200  |
| Au | 1.51517200  | -0.56119200 | 0.15439300  |
| H  | 0.28720700  | 6.68025700  | 1.24140500  |
| C  | -0.66772000 | 6.18928300  | 1.02571100  |
| C  | -0.64910700 | 4.70961000  | 1.46321900  |
| H  | -0.85229400 | 6.27421400  | -0.05186700 |
| H  | -1.45998600 | 6.73822600  | 1.54789400  |
| C  | 0.50565400  | 3.97089900  | 0.79788100  |
| C  | -2.01942500 | 4.05339300  | 1.22165300  |
| H  | -0.45920300 | 4.69434200  | 2.54669500  |
| C  | 0.44647400  | 3.52391400  | -0.52116000 |
| C  | 1.71619400  | 3.79998400  | 1.46037200  |
| H  | -2.79385400 | 4.56952800  | 1.80040600  |
| H  | -2.01428400 | 2.99744700  | 1.51173400  |
| H  | -2.31267900 | 4.11094100  | 0.16691400  |
| C  | 1.53737100  | 2.94521700  | -1.18344700 |
| H  | -0.47019100 | 3.66903800  | -1.08674400 |
| C  | 2.84946500  | 3.21023000  | 0.87367300  |
| H  | 1.80667600  | 4.17950800  | 2.47725500  |
| C  | 1.28003200  | 2.72306100  | -2.68818600 |
| C  | 2.76010400  | 2.74772200  | -0.46965600 |
| C  | 4.06116700  | 3.20219700  | 1.83405100  |
| H  | 0.18856100  | 2.63640200  | -2.75795300 |
| C  | 1.65665500  | 3.97275300  | -3.51523900 |
| C  | 1.82456200  | 1.45333800  | -3.35299000 |
| C  | 3.98332900  | 2.29381900  | -1.23837700 |
| C  | 5.49099900  | 3.12967000  | 1.27598200  |
| C  | 3.84652100  | 2.15849900  | 2.95430900  |
| H  | 4.01038100  | 4.18015800  | 2.33164200  |
| H  | 1.28683800  | 3.86785800  | -4.54227000 |
| H  | 1.21783900  | 4.88071000  | -3.08810200 |
| H  | 2.74099800  | 4.10966100  | -3.56731700 |
| H  | 1.32997500  | 1.31747300  | -4.32259900 |
| H  | 1.61339600  | 0.56819500  | -2.74524000 |
| H  | 2.89891700  | 1.49944600  | -3.54136000 |
| C  | 4.66964200  | 3.33441100  | -1.89320800 |
| C  | 4.48211700  | 0.97176800  | -1.39924700 |
| H  | 6.19328900  | 3.26923400  | 2.10621000  |
| H  | 5.68195200  | 3.92100400  | 0.54668600  |
| H  | 5.73264500  | 2.17740800  | 0.79793000  |
| H  | 2.93715200  | 2.37559700  | 3.52480200  |

|   |            |             |             |
|---|------------|-------------|-------------|
| H | 3.74016700 | 1.14732100  | 2.55033200  |
| H | 4.68968400 | 2.16175400  | 3.65514200  |
| C | 5.78962700 | 3.11847300  | -2.69072600 |
| H | 4.30049100 | 4.34643800  | -1.75946600 |
| C | 5.61255300 | 0.77162300  | -2.21850900 |
| P | 3.80029200 | -0.54302600 | -0.57224600 |
| C | 6.26381000 | 1.82054400  | -2.86123900 |
| H | 6.28182400 | 3.95674500  | -3.17534600 |
| H | 5.99445700 | -0.23035700 | -2.37519500 |
| C | 4.05520900 | -1.97470000 | -1.77239900 |
| C | 4.97161800 | -0.81444000 | 0.88737100  |
| H | 7.12918500 | 1.61996600  | -3.48583300 |
| C | 3.42159700 | -1.71503800 | -3.15625900 |
| C | 3.51437700 | -3.30543000 | -1.19672600 |
| H | 5.14025500 | -2.08728600 | -1.90193800 |
| C | 6.43107000 | -1.24882600 | 0.54013900  |
| C | 4.35890400 | -1.69850500 | 2.00399400  |
| H | 5.02941200 | 0.19889600  | 1.29400300  |
| C | 3.68546000 | -2.88446900 | -4.12054400 |
| H | 2.33763500 | -1.58929100 | -3.03013500 |
| H | 3.79882700 | -0.78445400 | -3.58986600 |
| C | 3.77288800 | -4.47706600 | -2.16118900 |
| H | 3.97073600 | -3.53027700 | -0.22875400 |
| H | 2.43384500 | -3.20507700 | -1.02156000 |
| C | 6.73876300 | -2.69289100 | 0.96271800  |
| H | 6.65592500 | -1.11129900 | -0.52085300 |
| H | 7.11787300 | -0.57497600 | 1.06776600  |
| C | 5.42525700 | -2.01881300 | 3.06331800  |
| H | 3.95513400 | -2.63432500 | 1.60143700  |
| H | 3.51002200 | -1.17254600 | 2.45690300  |
| C | 3.17873200 | -4.21567200 | -3.55096000 |
| H | 3.20822900 | -2.67249000 | -5.08485200 |
| H | 4.76507500 | -2.95697500 | -4.31719600 |
| H | 3.35839300 | -5.39736400 | -1.73134600 |
| H | 4.85714200 | -4.63768400 | -2.25023500 |
| C | 6.56239500 | -2.89570000 | 2.48406800  |
| H | 6.08238600 | -3.38100800 | 0.41536700  |
| H | 7.76061300 | -2.95192800 | 0.66309800  |
| H | 4.96150200 | -2.51500400 | 3.92346000  |
| H | 5.83515000 | -1.07258000 | 3.44163600  |
| H | 2.08152900 | -4.18391600 | -3.47725100 |
| H | 3.42397400 | -5.04040700 | -4.23042100 |
| H | 6.36006100 | -3.95443700 | 2.68453100  |
| H | 7.49952100 | -2.65994900 | 3.00174500  |

|      |              |             |             |
|------|--------------|-------------|-------------|
| H    | -10.47776300 | -1.50590800 | -0.77333100 |
| C    | -11.10792500 | -0.66914800 | -1.05726800 |
| C    | -12.29647400 | -0.88485000 | -1.75519700 |
| C    | -10.70418600 | 0.63137700  | -0.73130400 |
| C    | -13.10008400 | 0.19518400  | -2.12837700 |
| H    | -12.59672400 | -1.89847000 | -2.00779300 |
| C    | -11.50943700 | 1.70924700  | -1.11563600 |
| C    | -9.44175200  | 0.87232000  | 0.06376000  |
| H    | -14.02632000 | 0.02556600  | -2.67057900 |
| C    | -12.70396800 | 1.49413100  | -1.80552400 |
| H    | -11.20021500 | 2.72490700  | -0.87709000 |
| O    | -8.45589600  | -0.08452600 | -0.29114000 |
| H    | -9.06772300  | 1.89404700  | -0.11692300 |
| H    | -9.65104200  | 0.79782800  | 1.14656200  |
| H    | -13.31877000 | 2.34110100  | -2.09807600 |
| C    | -7.26578900  | 0.03193800  | 0.45845200  |
| C    | -6.31010400  | -1.06441800 | -0.00044900 |
| H    | -6.81063400  | 1.02774700  | 0.30803400  |
| H    | -7.47662100  | -0.06484300 | 1.53885800  |
| C    | -4.95041200  | -1.01678000 | 0.71005400  |
| H    | -6.79092200  | -2.03695800 | 0.16850700  |
| H    | -6.17154500  | -0.96885800 | -1.08513900 |
| C    | -4.04304600  | -2.17329200 | 0.24963200  |
| H    | -5.11039800  | -1.05425100 | 1.79204000  |
| H    | -4.46174100  | -0.05605600 | 0.49958600  |
| H    | -4.12353400  | -2.22567900 | -0.83991700 |
| H    | -4.45719700  | -3.12580800 | 0.60991100  |
| 4d-3 |              |             |             |
| C    | -2.08162200  | -2.09829800 | 2.27411600  |
| C    | -2.57897100  | -1.86139400 | 0.82017200  |
| C    | -1.59403400  | -0.94312200 | 0.07730100  |
| C    | -1.56813700  | -2.44845000 | -0.18523300 |
| C    | -0.45967300  | -0.57930300 | 1.01047300  |
| C    | -0.66888700  | -1.42336400 | 2.29895600  |
| C    | -3.06811400  | -1.80044200 | 3.44441700  |
| C    | -2.61641400  | -2.50556200 | 4.73664000  |
| C    | -3.41747300  | -0.32562600 | 3.74125600  |
| C    | -1.95290500  | -3.06961500 | -1.47612000 |
| C    | -1.43677500  | -4.22317200 | -1.91399000 |
| C    | -1.99265600  | 0.06805100  | -0.94843200 |
| C    | -1.67819900  | 0.03433000  | -2.24550500 |
| O    | -0.49601200  | -0.41464900 | 3.38248100  |
| C    | -0.63708900  | 0.76727100  | 2.87246300  |
| C    | -0.58593400  | 1.97440600  | 3.73340700  |

|    |             |             |             |
|----|-------------|-------------|-------------|
| O  | -0.77145700 | 0.83531200  | 1.61407400  |
| H  | -1.89138800 | -3.17597800 | 2.36540400  |
| H  | -0.72812100 | -2.97753400 | 0.26913400  |
| H  | 0.13220000  | -2.13239800 | 2.48905500  |
| H  | -3.99684000 | -2.29298800 | 3.13164200  |
| H  | -3.36483600 | -2.37194100 | 5.52556800  |
| H  | -2.48723500 | -3.58291900 | 4.58260000  |
| H  | -1.66908400 | -2.09992100 | 5.11116700  |
| H  | -4.41454000 | -0.26292600 | 4.18992300  |
| H  | -3.43087700 | 0.30151700  | 2.84380700  |
| H  | -2.72596500 | 0.11154000  | 4.46795100  |
| H  | -2.68997700 | -2.55892200 | -2.08831200 |
| H  | -1.74746600 | -4.66060000 | -2.85790500 |
| H  | -0.69642900 | -4.77822700 | -1.34119300 |
| H  | -2.55866600 | 0.91696000  | -0.56632400 |
| H  | -1.99532200 | 0.82554000  | -2.91934400 |
| H  | -1.10316800 | -0.77735500 | -2.68122400 |
| H  | -1.51180400 | 2.54626800  | 3.61674300  |
| H  | 0.23953500  | 2.60731100  | 3.38967900  |
| H  | -0.44624000 | 1.69534700  | 4.77782700  |
| Au | 1.50714800  | -0.50436800 | 0.24457400  |
| H  | 0.98953600  | 6.85639500  | 0.91709900  |
| C  | -0.01575500 | 6.48858900  | 0.68656200  |
| C  | -0.19711400 | 5.02833000  | 1.15211800  |
| H  | -0.16286100 | 6.57150900  | -0.39671300 |
| H  | -0.74185200 | 7.14638100  | 1.17826400  |
| C  | 0.86706700  | 4.13348900  | 0.52735300  |
| C  | -1.63692100 | 4.55380800  | 0.89139600  |
| H  | -0.03237600 | 5.01417800  | 2.23988700  |
| C  | 0.73904600  | 3.59646300  | -0.75204300 |
| C  | 2.07117900  | 3.89902200  | 1.18460900  |
| H  | -2.34670000 | 5.15978300  | 1.46577200  |
| H  | -1.77467700 | 3.50202800  | 1.16806300  |
| H  | -1.91000400 | 4.65443700  | -0.16509800 |
| C  | 1.75999100  | 2.87428100  | -1.38553600 |
| H  | -0.17336600 | 3.77837800  | -1.31355800 |
| C  | 3.13393400  | 3.16710200  | 0.62568800  |
| H  | 2.22090300  | 4.34582700  | 2.16712600  |
| C  | 1.44458000  | 2.56079300  | -2.86231700 |
| C  | 2.97510600  | 2.61907600  | -0.67852600 |
| C  | 4.35779000  | 3.10872100  | 1.56734600  |
| H  | 0.34811700  | 2.54097800  | -2.89818000 |
| C  | 1.87854400  | 3.72069100  | -3.78636400 |
| C  | 1.88781700  | 1.21373400  | -3.44426600 |

|   |            |             |             |
|---|------------|-------------|-------------|
| C | 4.13739900 | 2.00569400  | -1.43198900 |
| C | 5.76501100 | 2.88975400  | 0.99070800  |
| C | 4.07662100 | 2.14239200  | 2.74092800  |
| H | 4.39744900 | 4.11133200  | 2.01424300  |
| H | 1.48351100 | 3.56246600  | -4.79692200 |
| H | 1.50382100 | 4.68342100  | -3.42273600 |
| H | 2.96808900 | 3.78629400  | -3.86376400 |
| H | 1.35251700 | 1.03831000  | -4.38544400 |
| H | 1.64353200 | 0.39239100  | -2.76450300 |
| H | 2.95597300 | 1.17724700  | -3.66746900 |
| C | 4.88648900 | 2.93552600  | -2.17856400 |
| C | 4.52724800 | 0.63926100  | -1.49851900 |
| H | 6.49411900 | 3.02311300  | 1.79850800  |
| H | 6.00046800 | 3.61810500  | 0.21049200  |
| H | 5.92014700 | 1.89423000  | 0.56888000  |
| H | 3.20731600 | 2.46997200  | 3.32178000  |
| H | 3.86434300 | 1.12943500  | 2.38651600  |
| H | 4.93434200 | 2.09723100  | 3.42237100  |
| C | 5.96518900 | 2.57126100  | -2.97904800 |
| H | 4.60135600 | 3.98114700  | -2.11701000 |
| C | 5.61746800 | 0.28911500  | -2.32177800 |
| P | 3.75243300 | -0.75445200 | -0.54667900 |
| C | 6.33168400 | 1.23048100  | -3.05749800 |
| H | 6.50860300 | 3.32850300  | -3.53681100 |
| H | 5.91695000 | -0.74887800 | -2.40708300 |
| C | 3.83979400 | -2.28054000 | -1.65028400 |
| C | 4.95995800 | -1.03371200 | 0.88364400  |
| H | 7.16248800 | 0.91440200  | -3.68131200 |
| C | 3.17124900 | -2.07052300 | -3.02538400 |
| C | 3.22488600 | -3.51809100 | -0.95359700 |
| H | 4.90532900 | -2.49127400 | -1.81205100 |
| C | 6.35457700 | -1.64100700 | 0.51741000  |
| C | 4.31660900 | -1.76374000 | 2.08963600  |
| H | 5.13577500 | -0.00464400 | 1.20935000  |
| C | 3.29973100 | -3.32584100 | -3.90594200 |
| H | 2.10716900 | -1.84521400 | -2.87285100 |
| H | 3.60622700 | -1.20965600 | -3.54139600 |
| C | 3.34799600 | -4.77360500 | -1.83586900 |
| H | 3.70814800 | -3.70718500 | 0.00930600  |
| H | 2.16434600 | -3.32078100 | -0.74336500 |
| C | 6.56898900 | -3.04047300 | 1.11415000  |
| H | 6.51960600 | -1.67162000 | -0.56281800 |
| H | 7.12980300 | -0.96980800 | 0.90767100  |
| C | 5.38243600 | -2.04554800 | 3.16054000  |

|   |              |             |             |
|---|--------------|-------------|-------------|
| H | 3.84611800   | -2.70512400 | 1.78520400  |
| H | 3.51260500   | -1.14298800 | 2.50213200  |
| C | 2.71441500   | -4.56540700 | -3.21694400 |
| H | 2.79953300   | -3.14706000 | -4.86533200 |
| H | 4.36085400   | -3.50111700 | -4.13595700 |
| H | 2.88158200   | -5.62335700 | -1.32211400 |
| H | 4.41110900   | -5.02869600 | -1.95430400 |
| C | 6.46350300   | -3.03328400 | 2.65341100  |
| H | 5.83074500   | -3.73456800 | 0.69273700  |
| H | 7.54891700   | -3.42215700 | 0.80544900  |
| H | 4.90587900   | -2.43376400 | 4.06789500  |
| H | 5.84748600   | -1.09215400 | 3.44556400  |
| H | 1.62799800   | -4.43721700 | -3.10276100 |
| H | 2.86267100   | -5.45476100 | -3.84076400 |
| H | 6.24165700   | -4.04858600 | 3.00241500  |
| H | 7.43304000   | -2.76502000 | 3.08931100  |
| H | -10.49917700 | -1.63661200 | -0.71147900 |
| C | -11.16741800 | -0.84954600 | -1.04548400 |
| C | -12.35442300 | -1.16346000 | -1.70863800 |
| C | -10.81570500 | 0.48630000  | -0.81880400 |
| C | -13.20754400 | -0.14739500 | -2.14519900 |
| H | -12.61421900 | -2.20415200 | -1.88424800 |
| C | -11.67051700 | 1.49987700  | -1.26654400 |
| C | -9.55724300  | 0.84008100  | -0.06004200 |
| H | -14.13218800 | -0.39346600 | -2.66012000 |
| C | -12.86287000 | 1.18678400  | -1.92127500 |
| H | -11.40186600 | 2.54199900  | -1.10514900 |
| O | -8.55171800  | -0.13026500 | -0.30247400 |
| H | -9.20355100  | 1.84147100  | -0.35853000 |
| H | -9.76602700  | 0.88858400  | 1.02447500  |
| H | -13.51644300 | 1.98447200  | -2.26404700 |
| C | -7.36257400  | 0.10672300  | 0.41971900  |
| C | -6.37570700  | -1.01000100 | 0.09601300  |
| H | -6.93510400  | 1.08830200  | 0.14522200  |
| H | -7.56883900  | 0.13889200  | 1.50498700  |
| C | -5.01456300  | -0.82230300 | 0.78107000  |
| H | -6.82100100  | -1.96779600 | 0.39536400  |
| H | -6.24668100  | -1.05159700 | -0.99317400 |
| C | -4.05977700  | -1.98805800 | 0.46008500  |
| H | -5.16983300  | -0.72816900 | 1.86042600  |
| H | -4.56765400  | 0.12295400  | 0.44499900  |
| H | -4.12962600  | -2.16509600 | -0.61663600 |
| H | -4.44533200  | -2.90887800 | 0.92107800  |

|    |             |             |             |
|----|-------------|-------------|-------------|
| C  | -2.10238000 | -0.37947100 | 1.88614700  |
| C  | -2.63266800 | 0.36485800  | 0.62014700  |
| C  | -1.48127600 | 1.25393100  | 0.10692600  |
| C  | -1.87051500 | -0.00763100 | -0.65690300 |
| C  | -0.28826300 | 1.05058500  | 1.07491400  |
| C  | -0.81985100 | 0.33292600  | 2.22078700  |
| C  | -3.05880700 | -0.70708800 | 3.08208100  |
| C  | -2.46085900 | -1.83239700 | 3.94590000  |
| C  | -3.49151700 | 0.46293600  | 3.98149100  |
| C  | -2.49165400 | 0.01985400  | -2.00434300 |
| C  | -2.23332700 | -0.88482400 | -2.95450400 |
| C  | -1.69862100 | 2.62462600  | -0.44518800 |
| C  | -1.40067100 | 3.01300600  | -1.68735400 |
| O  | -1.14643900 | 2.00054800  | 3.21384300  |
| C  | -0.35226700 | 2.74738500  | 2.62249600  |
| C  | -0.04125200 | 4.14354900  | 3.05608300  |
| O  | 0.27274300  | 2.32266200  | 1.53467800  |
| H  | -1.75995000 | -1.37762900 | 1.56202200  |
| H  | -1.16479400 | -0.83268200 | -0.54339900 |
| H  | -0.18993800 | -0.00712200 | 3.03638100  |
| H  | -3.95888000 | -1.11242800 | 2.60741300  |
| H  | -3.16059200 | -2.11413900 | 4.73965000  |
| H  | -2.24625300 | -2.73176900 | 3.35636900  |
| H  | -1.53065000 | -1.51667100 | 4.43582900  |
| H  | -4.33274700 | 0.14045500  | 4.60496300  |
| H  | -3.81263600 | 1.34260300  | 3.41843700  |
| H  | -2.68592400 | 0.77808400  | 4.64991000  |
| H  | -3.18877700 | 0.82538400  | -2.21908700 |
| H  | -2.70809600 | -0.83560100 | -3.92971000 |
| H  | -1.54315600 | -1.71031800 | -2.79147200 |
| H  | -2.12805700 | 3.35513700  | 0.24316500  |
| H  | -1.57974800 | 4.03250500  | -2.01764400 |
| H  | -0.98185000 | 2.32577700  | -2.41707900 |
| H  | -0.65183600 | 4.83951600  | 2.46898200  |
| H  | 1.00824400  | 4.37137000  | 2.85621200  |
| H  | -0.27616400 | 4.27087400  | 4.11326400  |
| Au | 1.37033900  | -0.17941200 | 0.39658500  |
| H  | 4.74229000  | 6.31471800  | -0.09884600 |
| C  | 3.72087000  | 6.52433000  | -0.43336400 |
| C  | 2.72220200  | 5.48536700  | 0.12050400  |
| H  | 3.71866700  | 6.51479800  | -1.52977300 |
| H  | 3.45389100  | 7.53479500  | -0.10259300 |
| C  | 3.14570000  | 4.07675900  | -0.27854000 |
| C  | 1.28686700  | 5.84840800  | -0.29120500 |

|   |            |             |             |
|---|------------|-------------|-------------|
| H | 2.77899800 | 5.53646500  | 1.21830900  |
| C | 2.68151500 | 3.43887000  | -1.42641300 |
| C | 4.10472900 | 3.39939600  | 0.46774100  |
| H | 0.99496000 | 6.80369700  | 0.15943800  |
| H | 0.56921300 | 5.08050400  | 0.01784400  |
| H | 1.19736600 | 5.96680800  | -1.37727800 |
| C | 3.15240700 | 2.18733100  | -1.85053300 |
| H | 1.94784000 | 3.94028000  | -2.05058300 |
| C | 4.61255800 | 2.13688000  | 0.12193400  |
| H | 4.50844400 | 3.88679900  | 1.35408200  |
| C | 2.62273900 | 1.78370300  | -3.24182800 |
| C | 4.11593700 | 1.49880500  | -1.05091600 |
| C | 5.68921000 | 1.65240700  | 1.11963200  |
| H | 1.70463000 | 2.37407700  | -3.35551900 |
| C | 3.56251700 | 2.25482300  | -4.37400400 |
| C | 2.19385100 | 0.32889300  | -3.46634700 |
| C | 4.76878800 | 0.24875100  | -1.60355900 |
| C | 6.75369400 | 0.63688900  | 0.67666500  |
| C | 5.02325700 | 1.22490900  | 2.44755100  |
| H | 6.25895700 | 2.56119800  | 1.35581300  |
| H | 3.06408700 | 2.14263000  | -5.34426400 |
| H | 3.83414100 | 3.30886500  | -4.25295400 |
| H | 4.48373500 | 1.66579500  | -4.40568400 |
| H | 1.60816000 | 0.26467100  | -4.39126200 |
| H | 1.55925300 | -0.02722800 | -2.64765500 |
| H | 3.04260900 | -0.34949000 | -3.57128300 |
| C | 5.84426300 | 0.50201500  | -2.47680900 |
| C | 4.42512200 | -1.11000400 | -1.36283700 |
| H | 7.49299500 | 0.53804700  | 1.48017400  |
| H | 7.28377100 | 0.97014600  | -0.21923900 |
| H | 6.35681300 | -0.36017200 | 0.47186400  |
| H | 4.46156900 | 2.05352700  | 2.89117500  |
| H | 4.31607600 | 0.40384000  | 2.29708100  |
| H | 5.77757100 | 0.90227000  | 3.17508400  |
| C | 6.56237200 | -0.50881900 | -3.10888700 |
| H | 6.12037900 | 1.53717800  | -2.65142500 |
| C | 5.15937600 | -2.12088800 | -2.01780000 |
| P | 3.10417200 | -1.70141500 | -0.20440900 |
| C | 6.21387700 | -1.83730800 | -2.88045200 |
| H | 7.38383400 | -0.25762500 | -3.77361800 |
| H | 4.89884100 | -3.16170100 | -1.86484200 |
| C | 2.35656500 | -3.25068800 | -0.97901700 |
| C | 4.05383800 | -2.26258000 | 1.33303500  |
| H | 6.75099500 | -2.64705600 | -3.36519500 |



|   |              |             |             |
|---|--------------|-------------|-------------|
| C | 1.89475800   | -3.05241200 | -2.43825700 |
| C | 1.18311600   | -3.80607400 | -0.13720500 |
| H | 3.15325000   | -4.00703000 | -0.97083600 |
| C | 4.90503900   | -3.56584600 | 1.19205300  |
| C | 3.17108100   | -2.29034600 | 2.60698600  |
| H | 4.75628900   | -1.43402200 | 1.45850100  |
| C | 1.36906400   | -4.36994200 | -3.03463500 |
| H | 1.09685200   | -2.29826000 | -2.46196500 |
| H | 2.70989600   | -2.66738500 | -3.05701500 |
| C | 0.65090300   | -5.12353300 | -0.72962700 |
| H | 1.48410100   | -3.97230300 | 0.90109900  |
| H | 0.37593300   | -3.06010800 | -0.11650000 |
| C | 4.33660000   | -4.73832300 | 2.00557900  |
| H | 5.03150900   | -3.86181400 | 0.14727400  |
| H | 5.91771900   | -3.34604100 | 1.55262200  |
| C | 3.94915100   | -2.91865700 | 3.77359900  |
| H | 2.24512600   | -2.85235900 | 2.43931300  |
| H | 2.86449700   | -1.26747100 | 2.85571900  |
| C | 0.22903900   | -4.96253500 | -2.19562500 |
| H | 1.03645000   | -4.19436800 | -4.06466000 |
| H | 2.19475300   | -5.09396800 | -3.09387500 |
| H | -0.19114900  | -5.47957100 | -0.12352000 |
| H | 1.43363900   | -5.89224400 | -0.65581700 |
| C | 4.26808400   | -4.41145300 | 3.51322600  |
| H | 3.33593500   | -4.99072400 | 1.63246500  |
| H | 4.95183700   | -5.63001000 | 1.84023500  |
| H | 3.38208800   | -2.80649200 | 4.70463300  |
| H | 4.88005000   | -2.35311100 | 3.91464700  |
| H | -0.64677400  | -4.29889700 | -2.25131200 |
| H | -0.08623800  | -5.92818600 | -2.60789300 |
| H | 3.50896700   | -5.04681300 | 3.98442500  |
| H | 5.22051400   | -4.66645900 | 3.99232700  |
| H | -9.77662800  | -2.13377100 | -0.12824400 |
| C | -9.79074400  | -1.29408500 | -0.84727000 |
| C | -11.14723100 | -0.62736000 | -0.84298800 |
| O | -8.78559800  | -0.35715000 | -0.49632500 |
| H | -9.58315600  | -1.72592300 | -1.84074500 |
| C | -11.43901300 | 0.40283700  | 0.05885300  |
| C | -12.14669400 | -1.06840000 | -1.71764100 |
| C | -7.49731900  | -0.92833900 | -0.40898900 |
| C | -12.70914900 | 0.98012500  | 0.08339500  |
| H | -10.66100600 | 0.75580200  | 0.72801600  |
| C | -13.42053500 | -0.49833500 | -1.68737700 |
| H | -11.92763700 | -1.86139400 | -2.42986700 |

|   |              |             |             |
|---|--------------|-------------|-------------|
| C | -6.51434300  | 0.16854300  | -0.01325000 |
| H | -7.48609200  | -1.74402300 | 0.33656400  |
| H | -7.20632800  | -1.37400800 | -1.37690700 |
| C | -13.70481900 | 0.52937700  | -0.78638300 |
| H | -12.92239900 | 1.78356200  | 0.78374600  |
| H | -14.18635100 | -0.85056300 | -2.37323800 |
| C | -5.07163100  | -0.33818500 | 0.10601500  |
| H | -6.57186400  | 0.97147600  | -0.75978100 |
| H | -6.84474900  | 0.60329100  | 0.93934800  |
| H | -14.69383800 | 0.97893300  | -0.76512300 |
| C | -4.09428000  | 0.78482800  | 0.50534900  |
| H | -4.74915200  | -0.77342300 | -0.84790000 |
| H | -5.03263300  | -1.15454800 | 0.83988900  |
| H | -4.42722000  | 1.23691000  | 1.44615900  |
| H | -4.16589200  | 1.58612800  | -0.24074300 |

5d-3

|   |              |             |             |
|---|--------------|-------------|-------------|
| C | 2.59374800   | 1.34464600  | -0.63665200 |
| C | 1.94368000   | -0.02681600 | -0.24354300 |
| C | 2.38646400   | -1.21584700 | -1.10819500 |
| C | 4.32084900   | -0.12672500 | 0.01615900  |
| C | 4.08327800   | 1.06951300  | -0.53216400 |
| C | 3.08270600   | -0.93143400 | 0.23699100  |
| C | 1.56405200   | -2.43332000 | -1.27592300 |
| C | 1.50596300   | -3.14873400 | -2.40472000 |
| C | 3.03659100   | -1.91135000 | 1.36329300  |
| C | 2.67157600   | -1.61687300 | 2.61272800  |
| O | 6.88700900   | 1.00788700  | 0.00756200  |
| C | 6.71525300   | -0.14591800 | 0.31674600  |
| C | 7.78850600   | -1.11190900 | 0.75702200  |
| O | 5.50251800   | -0.77957800 | 0.31961300  |
| H | 2.98232800   | -0.96901800 | -1.98577000 |
| H | 4.83840000   | 1.76320300  | -0.86459500 |
| H | 0.99915400   | -2.77578900 | -0.41014500 |
| H | 0.90307500   | -4.04929000 | -2.47759800 |
| H | 2.05848200   | -2.85848000 | -3.29589400 |
| H | 3.35859300   | -2.92627300 | 1.12868500  |
| H | 2.68669700   | -2.36582400 | 3.40035600  |
| H | 2.34868200   | -0.61772800 | 2.89580600  |
| H | 7.57523700   | -1.47674900 | 1.76719300  |
| H | 8.75575200   | -0.60887900 | 0.73990800  |
| H | 7.80868300   | -1.98250000 | 0.09321700  |
| H | -10.05533700 | 0.81809000  | -0.41332500 |
| C | -9.13256900  | 0.41151300  | -0.00743000 |
| C | -9.12698600  | -0.19671800 | 1.24916000  |

|                    |              |             |             |
|--------------------|--------------|-------------|-------------|
| C                  | -7.94983900  | 0.50978100  | -0.74117500 |
| H                  | -10.04558900 | -0.26888100 | 1.82554300  |
| C                  | -7.93263100  | -0.70523400 | 1.76296000  |
| C                  | -6.75089600  | -0.00592100 | -0.23576500 |
| H                  | -7.95846900  | 0.99510000  | -1.71531900 |
| C                  | -6.75211700  | -0.61429600 | 1.02432700  |
| H                  | -7.91888600  | -1.17481700 | 2.74336200  |
| C                  | -5.49066100  | 0.05599500  | -1.06963800 |
| H                  | -5.82019700  | -1.00097600 | 1.42293500  |
| O                  | -4.35036900  | 0.05937600  | -0.23330900 |
| H                  | -5.44881400  | -0.81331300 | -1.75198500 |
| H                  | -5.50441800  | 0.95495000  | -1.70983600 |
| C                  | -3.13062400  | 0.01457700  | -0.95447200 |
| C                  | -1.97665700  | 0.01446800  | 0.03984800  |
| H                  | -3.09620300  | -0.88961000 | -1.58760000 |
| H                  | -3.05712500  | 0.88438100  | -1.63077500 |
| C                  | -0.60360100  | -0.03690700 | -0.64166800 |
| H                  | -2.05792300  | 0.91218100  | 0.66728100  |
| H                  | -2.09645900  | -0.84634000 | 0.71138500  |
| C                  | 0.55193400   | -0.08697100 | 0.37582400  |
| H                  | -0.48795300  | 0.83095800  | -1.30349700 |
| H                  | -0.54541900  | -0.91811800 | -1.29215600 |
| H                  | 0.45754800   | -1.00666600 | 0.96394000  |
| H                  | 0.43860200   | 0.72655700  | 1.10274500  |
| C                  | 2.17709400   | 2.58139800  | 0.23295600  |
| H                  | 2.07198400   | 2.23293500  | 1.27091600  |
| C                  | 3.25554500   | 3.68133900  | 0.23519700  |
| H                  | 2.90543900   | 4.54792600  | 0.80784900  |
| H                  | 4.19372700   | 3.34178800  | 0.68211800  |
| H                  | 3.47280900   | 4.02789900  | -0.78394500 |
| C                  | 0.84669500   | 3.20950400  | -0.21608700 |
| H                  | 0.60426600   | 4.07910700  | 0.40621100  |
| H                  | 0.91948200   | 3.55977500  | -1.25430400 |
| H                  | 0.00124400   | 2.52164800  | -0.15758600 |
| H                  | 2.33521400   | 1.58469300  | -1.68072400 |
| T <sub>Sd</sub> -3 |              |             |             |
| C                  | 2.49407100   | 1.25820300  | -0.69077800 |
| C                  | 4.00238100   | 1.12283500  | -0.63367800 |
| C                  | 2.02222400   | 2.49025900  | 0.16465500  |
| C                  | 3.03910200   | 3.64849600  | 0.12901900  |
| C                  | 0.65559300   | 3.04658300  | -0.27093300 |
| C                  | 1.98575000   | -0.17987700 | -0.23558300 |
| C                  | 3.20568100   | -0.81429400 | 0.43168200  |
| C                  | 4.35343900   | 0.01920900  | 0.04055600  |

|   |              |             |             |
|---|--------------|-------------|-------------|
| O | 5.60375300   | -0.47698800 | 0.36909300  |
| C | 6.74507300   | 0.27258200  | 0.27800100  |
| C | 7.92144800   | -0.54281000 | 0.75763300  |
| O | 6.79157000   | 1.40845200  | -0.12622600 |
| C | 2.29037400   | -1.22134900 | -1.29789600 |
| C | 1.93411200   | -2.57308300 | -1.36873100 |
| C | 1.20010400   | -3.31658100 | -0.45720600 |
| C | 2.37038400   | -2.86391600 | 1.60380300  |
| C | 3.35567900   | -1.98767000 | 1.19078600  |
| H | 2.16778300   | 1.43811700  | -1.72555800 |
| H | 4.68365300   | 1.84541300  | -1.05106600 |
| H | 1.95676400   | 2.15962700  | 1.21108400  |
| H | 2.65468300   | 4.49819500  | 0.70484000  |
| H | 4.00652700   | 3.36667000  | 0.55283300  |
| H | 3.20949900   | 3.99872300  | -0.89775100 |
| H | 0.39090500   | 3.92251800  | 0.33305700  |
| H | -0.15985900  | 2.32807300  | -0.17485000 |
| H | 0.69151600   | 3.37131600  | -1.31931500 |
| H | 7.76922900   | -0.84992600 | 1.79756800  |
| H | 8.83062300   | 0.05344200  | 0.67568500  |
| H | 8.01780100   | -1.45416000 | 0.15836200  |
| H | 2.96889100   | -0.87285500 | -2.07159200 |
| H | 2.49052100   | -3.13757700 | -2.11821900 |
| H | 0.38219700   | -2.89049600 | 0.10398400  |
| H | 1.15299800   | -4.39547900 | -0.57763600 |
| H | 1.38458600   | -2.53275200 | 1.89194800  |
| H | 2.67059300   | -3.81166200 | 2.04314100  |
| H | 4.38595900   | -2.33059400 | 1.27149300  |
| H | -7.86822700  | 1.30485100  | 2.65169500  |
| C | -7.88849600  | 0.80354700  | 1.68725100  |
| C | -9.09642800  | 0.33095700  | 1.17152800  |
| C | -6.70207200  | 0.63622100  | 0.97126700  |
| H | -10.01924000 | 0.46255700  | 1.73039500  |
| C | -9.11071000  | -0.31780700 | -0.06478500 |
| C | -6.70962400  | -0.01384300 | -0.26748900 |
| H | -5.76015800  | 0.99573300  | 1.37151000  |
| C | -7.92307700  | -0.49232100 | -0.77552300 |
| H | -10.04464000 | -0.69634600 | -0.47226100 |
| C | -5.44234200  | -0.16576700 | -1.07909000 |
| H | -7.93915100  | -1.00874200 | -1.73352200 |
| O | -4.31022600  | -0.13253400 | -0.23278100 |
| H | -5.47098900  | -1.11032600 | -1.64949800 |
| H | -5.37361700  | 0.64773700  | -1.82510900 |
| C | -3.08485900  | -0.20637900 | -0.94106500 |

|      |             |             |             |
|------|-------------|-------------|-------------|
| C    | -1.93786700 | -0.14445000 | 0.05974200  |
| H    | -3.03835800 | -1.14365000 | -1.52270800 |
| H    | -3.01225000 | 0.62550100  | -1.66394600 |
| C    | -0.56174800 | -0.23837700 | -0.61104000 |
| H    | -2.02363300 | 0.78996700  | 0.63058900  |
| H    | -2.06294600 | -0.96218200 | 0.78219900  |
| C    | 0.59097400  | -0.21473600 | 0.40886500  |
| H    | -0.44642100 | 0.58136700  | -1.33194700 |
| H    | -0.50012900 | -1.16104200 | -1.19949900 |
| H    | 0.48755200  | -1.08292800 | 1.06075700  |
| H    | 0.48158200  | 0.64568100  | 1.07668500  |
| 6d-3 |             |             |             |
| C    | -3.04858800 | -0.84514600 | 1.33424400  |
| C    | -3.08931500 | 0.66879400  | 1.31680900  |
| C    | -2.26335800 | -1.47588300 | 2.51684900  |
| C    | -2.72133600 | -0.88562900 | 3.86339000  |
| C    | -2.41153400 | -3.00685600 | 2.57055700  |
| C    | -2.62194600 | -1.22229000 | -0.14984800 |
| C    | -3.02856200 | 0.03522900  | -0.93753300 |
| C    | -3.10188100 | 1.11721200  | 0.05186100  |
| O    | -3.22934500 | 2.40129000  | -0.45268400 |
| C    | -3.35610200 | 3.50751600  | 0.33951800  |
| C    | -3.49858300 | 4.73472600  | -0.52890700 |
| O    | -3.35047200 | 3.49636800  | 1.54645300  |
| C    | -3.34684700 | -2.47449200 | -0.62740000 |
| C    | -3.45297100 | -2.90266000 | -1.89016400 |
| C    | -2.90031900 | -2.20665300 | -3.11356100 |
| C    | -3.47527900 | -0.79996500 | -3.34522000 |
| C    | -3.34184800 | 0.20570500  | -2.23318000 |
| H    | -4.08988000 | -1.19441600 | 1.45722200  |
| H    | -3.18754000 | 1.28602300  | 2.19486100  |
| H    | -1.19750800 | -1.24037700 | 2.40361900  |
| H    | -2.21431600 | -1.39208800 | 4.69296800  |
| H    | -2.50063300 | 0.18248500  | 3.94850800  |
| H    | -3.80188900 | -1.01906000 | 4.00620100  |
| H    | -1.84910700 | -3.41479500 | 3.41863000  |
| H    | -2.04926100 | -3.50257700 | 1.66530600  |
| H    | -3.46343300 | -3.29130800 | 2.70708200  |
| H    | -2.63275100 | 4.83172200  | -1.19201500 |
| H    | -3.58214200 | 5.61760500  | 0.10546000  |
| H    | -4.38731400 | 4.64689600  | -1.16271000 |
| H    | -3.81253000 | -3.07854500 | 0.14849500  |
| H    | -3.99907100 | -3.82937800 | -2.06336200 |
| H    | -1.80616200 | -2.13545100 | -3.05385100 |

|                     |             |             |             |
|---------------------|-------------|-------------|-------------|
| H                   | -3.11088200 | -2.81251000 | -4.00239000 |
| H                   | -3.01787700 | -0.37970400 | -4.25338400 |
| H                   | -4.54791500 | -0.89048900 | -3.58336700 |
| H                   | -3.61333000 | 1.21996500  | -2.52470500 |
| H                   | 9.15495900  | 1.45038400  | -0.86545500 |
| C                   | 8.33858200  | 0.82546500  | -0.51250400 |
| C                   | 8.59066300  | -0.47448600 | -0.07088600 |
| C                   | 7.03461900  | 1.32241400  | -0.51295600 |
| H                   | 9.60446100  | -0.86624000 | -0.07506700 |
| C                   | 7.53123300  | -1.27019500 | 0.36973300  |
| C                   | 5.96948200  | 0.53355300  | -0.06392700 |
| H                   | 6.84282400  | 2.33286200  | -0.86892000 |
| C                   | 6.22905100  | -0.76900400 | 0.37700300  |
| H                   | 7.71880100  | -2.28575500 | 0.70932700  |
| C                   | 4.57126700  | 1.10715700  | -0.01316700 |
| H                   | 5.40148200  | -1.38641000 | 0.71023300  |
| O                   | 3.61413500  | 0.07734400  | -0.16764800 |
| H                   | 4.41106400  | 1.62127900  | 0.95279100  |
| H                   | 4.44753200  | 1.87261700  | -0.79861200 |
| C                   | 2.27951800  | 0.53367500  | -0.02257600 |
| C                   | 1.33535800  | -0.64798300 | -0.20439000 |
| H                   | 2.14096500  | 0.99106900  | 0.97310500  |
| H                   | 2.06262300  | 1.31721500  | -0.76974500 |
| C                   | -0.14027100 | -0.25270800 | -0.05101900 |
| H                   | 1.51135700  | -1.08522400 | -1.19610000 |
| H                   | 1.60004300  | -1.42101100 | 0.52936200  |
| C                   | -1.07361100 | -1.45235100 | -0.27976100 |
| H                   | -0.38325900 | 0.53858700  | -0.77189800 |
| H                   | -0.29873600 | 0.18248800  | 0.94284800  |
| H                   | -0.78749400 | -2.26522100 | 0.39741300  |
| H                   | -0.88215900 | -1.83152800 | -1.28860600 |
| Ts <sub>ic</sub> -3 |             |             |             |
| C                   | -0.79070600 | 4.53986600  | -0.76820200 |
| C                   | 0.06888300  | 4.56005500  | 0.51082100  |
| C                   | -0.57526000 | 4.89187500  | 1.70353300  |
| C                   | -0.95387700 | 2.86006800  | 0.73426800  |
| C                   | -1.81890300 | 3.46258700  | -0.32822700 |
| C                   | -1.21706200 | 5.88834100  | -1.40765100 |
| C                   | -2.01298500 | 5.61852400  | -2.69732200 |
| C                   | -1.94544200 | 6.88679000  | -0.49555800 |
| C                   | -0.49281000 | 1.74902100  | 1.23887500  |
| C                   | 0.03887300  | 5.14105400  | 2.99241800  |
| C                   | -0.67173900 | 5.64864400  | 4.01694300  |
| C                   | 0.53775700  | 1.48718900  | 2.24376300  |

|    |             |             |             |
|----|-------------|-------------|-------------|
| C  | 0.49058800  | 1.89353000  | 3.52118500  |
| O  | -3.03829800 | 3.99065500  | 0.23893900  |
| C  | -4.22212500 | 3.60202800  | -0.32613200 |
| C  | -5.38764800 | 4.20243600  | 0.41641500  |
| O  | -4.29396900 | 2.87893500  | -1.29366100 |
| H  | -0.19709000 | 4.02944100  | -1.53216100 |
| H  | -1.64124000 | 5.09460800  | 1.66188000  |
| H  | -2.09620300 | 2.75129200  | -1.10784900 |
| H  | -0.27154200 | 6.36547600  | -1.70629100 |
| H  | -2.22856400 | 6.55833300  | -3.21625500 |
| H  | -1.45099900 | 4.97935200  | -3.38864400 |
| H  | -2.96953000 | 5.12491400  | -2.49237300 |
| H  | -2.13793100 | 7.81132600  | -1.05079400 |
| H  | -1.34786900 | 7.15804800  | 0.38154400  |
| H  | -2.90848200 | 6.50154400  | -0.14793400 |
| H  | 1.10486600  | 4.97426600  | 3.11007000  |
| H  | -0.20361900 | 5.90146100  | 4.96306100  |
| H  | -1.73966200 | 5.83663400  | 3.93450800  |
| H  | 1.33943700  | 0.82438400  | 1.92137500  |
| H  | 1.26558200  | 1.59721100  | 4.22234200  |
| H  | -0.32718800 | 2.49127300  | 3.90909100  |
| H  | -5.36962200 | 3.88603600  | 1.46451100  |
| H  | -6.31857300 | 3.88310600  | -0.05256600 |
| H  | -5.32329600 | 5.29561200  | 0.40259200  |
| H  | -5.53010900 | -2.02928000 | 3.45447800  |
| C  | -4.69523600 | -2.60434100 | 3.03645700  |
| C  | -4.14381000 | -1.84196100 | 1.80423200  |
| C  | -5.16404600 | -4.03726900 | 2.68841700  |
| H  | -3.92793500 | -2.64790600 | 3.81815800  |
| C  | -3.46596300 | -2.82435800 | 0.82381300  |
| H  | -4.96143400 | -1.31988600 | 1.29570500  |
| H  | -3.44101100 | -1.06577000 | 2.12876200  |
| C  | -5.65225000 | -4.11099800 | 1.23777700  |
| H  | -5.95409200 | -4.35329700 | 3.37836100  |
| H  | -4.33815900 | -4.74866400 | 2.82490100  |
| P  | -2.33500200 | -1.99998600 | -0.44680300 |
| C  | -4.50300600 | -3.82319200 | 0.23753200  |
| H  | -2.74710100 | -3.40617200 | 1.40991000  |
| H  | -6.45993300 | -3.38123800 | 1.09363700  |
| H  | -6.08410000 | -5.09371800 | 1.01778800  |
| Au | -1.33132100 | -0.02829900 | 0.41454700  |
| C  | -1.19257000 | -3.35861900 | -0.99356900 |
| C  | -3.39226200 | -1.54866800 | -1.93559100 |
| H  | -4.94017000 | -3.44695900 | -0.69367800 |

|   |             |             |             |
|---|-------------|-------------|-------------|
| H | -3.98971800 | -4.75820400 | -0.01216800 |
| C | 0.16606200  | -3.53662800 | -0.60641300 |
| C | -1.78397500 | -4.31474500 | -1.84628900 |
| C | -2.55488200 | -0.98504400 | -3.10160200 |
| C | -4.51297100 | -0.55992900 | -1.54294000 |
| H | -3.86979800 | -2.47403100 | -2.28152700 |
| C | 1.04771700  | -2.66980500 | 0.27516500  |
| C | 0.83199200  | -4.67922800 | -1.09367900 |
| C | -1.09330700 | -5.42631400 | -2.31905300 |
| H | -2.81581100 | -4.19449500 | -2.15517500 |
| C | -3.44295200 | -0.63177300 | -4.30668400 |
| H | -2.03202000 | -0.08047100 | -2.76073700 |
| H | -1.78699600 | -1.70338500 | -3.40365700 |
| C | -5.38944400 | -0.19555800 | -2.75487300 |
| H | -5.14571300 | -0.98695000 | -0.75846900 |
| H | -4.06855000 | 0.35584800  | -1.13379700 |
| C | 2.00279300  | -1.79943900 | -0.33662900 |
| C | 1.15638800  | -2.92042200 | 1.67313800  |
| C | 0.23109200  | -5.61215200 | -1.93332300 |
| H | 1.86061400  | -4.83300600 | -0.78340100 |
| H | -1.58957400 | -6.13492800 | -2.97545400 |
| C | -4.55637900 | 0.35068800  | -3.92126300 |
| H | -2.81811500 | -0.21405400 | -5.10569300 |
| H | -3.88832200 | -1.55295400 | -4.71004600 |
| H | -6.13601400 | 0.54353600  | -2.44259600 |
| H | -5.94291900 | -1.08738300 | -3.08411500 |
| C | 2.98947800  | -1.19136900 | 0.45585700  |
| C | 2.18298100  | -1.51397000 | -1.84110700 |
| C | 2.18123200  | -2.28879400 | 2.39656200  |
| C | 0.29191500  | -3.83461800 | 2.56671000  |
| H | 0.79409800  | -6.47475700 | -2.27809300 |
| H | -4.11507400 | 1.31166600  | -3.62415200 |
| H | -5.20124100 | 0.55152000  | -4.78526000 |
| C | 3.12085200  | -1.43707200 | 1.82364800  |
| H | 3.71415300  | -0.54607000 | -0.03618100 |
| H | 2.70186700  | -0.54670300 | -1.86591000 |
| C | 3.14971400  | -2.52079700 | -2.50366900 |
| C | 0.92942900  | -1.32431200 | -2.70176200 |
| H | 2.26757900  | -2.51195000 | 3.45855000  |
| C | -0.36813600 | -5.08865500 | 1.97147800  |
| C | -0.71468500 | -2.98107200 | 3.37020900  |
| H | 0.99962100  | -4.22815600 | 3.30802400  |
| C | 4.28981700  | -0.91176500 | 2.64829600  |
| H | 3.40355400  | -2.18542900 | -3.51691400 |



|   |             |             |             |
|---|-------------|-------------|-------------|
| H | 4.07922900  | -2.61352900 | -1.93175500 |
| H | 2.70032100  | -3.51461200 | -2.58918700 |
| H | 1.21340500  | -0.87294600 | -3.66042900 |
| H | 0.21309900  | -0.65444100 | -2.21553000 |
| H | 0.42544600  | -2.26713900 | -2.92357400 |
| H | -0.79190400 | -5.67935300 | 2.79226700  |
| H | 0.35968700  | -5.71908200 | 1.45284400  |
| H | -1.17625000 | -4.87458000 | 1.26914300  |
| H | -0.19439000 | -2.24585600 | 3.99299500  |
| H | -1.38629400 | -2.42174400 | 2.71236500  |
| H | -1.32216500 | -3.61349800 | 4.02894200  |
| C | 5.55830600  | -1.74589500 | 2.36805000  |
| C | 4.57682500  | 0.58552500  | 2.44545700  |
| H | 4.02573400  | -1.06032000 | 3.70463300  |
| H | 5.38098400  | -2.81090900 | 2.55333300  |
| H | 5.88238400  | -1.63141500 | 1.32725600  |
| H | 6.38238900  | -1.41982900 | 3.01309300  |
| H | 5.36706900  | 0.91108700  | 3.13176000  |
| H | 3.68862600  | 1.19741700  | 2.64717600  |
| H | 4.92067300  | 0.80159300  | 1.42810800  |
| H | 8.55778300  | -2.87386900 | -1.47996800 |
| C | 8.42351000  | -1.82191500 | -1.24321900 |
| C | 9.30458300  | -1.18150000 | -0.37133600 |
| C | 7.36341600  | -1.11087500 | -1.81218500 |
| H | 10.12926200 | -1.73209300 | 0.07273700  |
| C | 9.12284400  | 0.17214600  | -0.07221700 |
| C | 7.17890500  | 0.24540600  | -1.52343400 |
| H | 6.67815500  | -1.61416600 | -2.49089000 |
| C | 8.06918500  | 0.88126300  | -0.64680300 |
| H | 9.80690500  | 0.67560200  | 0.60563700  |
| C | 6.05261100  | 1.02366000  | -2.15745600 |
| H | 7.92529000  | 1.93211900  | -0.41163000 |
| O | 5.30502200  | 1.68523700  | -1.13938100 |
| H | 6.44497000  | 1.77639400  | -2.86239300 |
| H | 5.39955300  | 0.34944000  | -2.73453400 |
| C | 4.20693800  | 2.42647700  | -1.63987700 |
| C | 3.60640100  | 3.22274100  | -0.48250300 |
| H | 4.53002800  | 3.09696100  | -2.45380300 |
| H | 3.45392300  | 1.74055800  | -2.06795000 |
| C | 2.15335000  | 3.64110000  | -0.73665500 |
| H | 3.64183200  | 2.58778300  | 0.41020100  |
| H | 4.23434500  | 4.09766200  | -0.27145000 |
| C | 1.58068400  | 4.45162600  | 0.43915200  |
| H | 1.55368000  | 2.73273100  | -0.88013400 |

|      |             |             |             |
|------|-------------|-------------|-------------|
| H    | 2.08167400  | 4.21871800  | -1.66789500 |
| H    | 1.99275200  | 5.47202700  | 0.41477400  |
| H    | 1.93892400  | 4.00745900  | 1.37442100  |
| 2c-3 |             |             |             |
| C    | -2.19303100 | 2.43073600  | 0.39193400  |
| C    | -3.03179800 | 2.24953700  | -0.81041500 |
| C    | -2.19192700 | 1.87596200  | -1.97007200 |
| C    | -0.79653700 | 1.57979300  | -1.37304500 |
| C    | -0.73676000 | 2.44142500  | -0.13375700 |
| C    | -2.67865800 | 3.34564100  | 1.54646500  |
| C    | -1.80921500 | 3.15012600  | 2.79890800  |
| C    | -2.78903500 | 4.83284900  | 1.16410800  |
| C    | 0.16647900  | 0.74275400  | -1.80280100 |
| C    | -2.84838400 | 0.99960400  | -3.00456300 |
| C    | -3.48122800 | 1.45176800  | -4.08858700 |
| C    | 0.12697200  | 0.02419500  | -3.08657800 |
| C    | 0.09484000  | 0.59887100  | -4.29897200 |
| O    | -0.38573100 | 3.79478000  | -0.55345800 |
| C    | 0.65406100  | 4.40718600  | 0.07627600  |
| C    | 1.01467400  | 5.69901300  | -0.61224000 |
| O    | 1.20666800  | 3.95135600  | 1.05466300  |
| H    | -2.28719600 | 1.37926100  | 0.76854800  |
| H    | -2.09478600 | 2.91393700  | -2.38787800 |
| H    | -0.01272900 | 2.11035400  | 0.60636400  |
| H    | -3.69125600 | 2.99669900  | 1.79435300  |
| H    | -2.21309500 | 3.73909200  | 3.62879000  |
| H    | -1.78834700 | 2.10017700  | 3.11537900  |
| H    | -0.77779700 | 3.47289100  | 2.62593200  |
| H    | -3.29632700 | 5.37701100  | 1.96751300  |
| H    | -3.36531800 | 4.98856300  | 0.24429300  |
| H    | -1.80760800 | 5.29017900  | 1.02369700  |
| H    | -2.80888900 | -0.06630500 | -2.79518700 |
| H    | -3.96172500 | 0.77134900  | -4.78499900 |
| H    | -3.51780400 | 2.50932800  | -4.34297700 |
| H    | 0.24648900  | -1.05826500 | -3.02211000 |
| H    | 0.14925800  | 0.00644900  | -5.20793400 |
| H    | 0.04570000  | 1.67817300  | -4.41986300 |
| H    | 1.54966900  | 5.47361500  | -1.54225000 |
| H    | 1.66039000  | 6.29116700  | 0.03713400  |
| H    | 0.11835200  | 6.26621100  | -0.87856400 |
| H    | 6.06937100  | 0.13762600  | -4.23855600 |
| C    | 6.28151900  | -0.23657500 | -3.23067300 |
| C    | 5.10902200  | 0.09055000  | -2.29308400 |
| C    | 7.61483000  | 0.35189800  | -2.70617200 |

|    |             |             |             |
|----|-------------|-------------|-------------|
| H  | 6.36170100  | -1.32833700 | -3.32190000 |
| C  | 5.31178600  | -0.61611900 | -0.92781800 |
| H  | 5.03176200  | 1.17735400  | -2.17699700 |
| H  | 4.15867000  | -0.23284600 | -2.73272100 |
| C  | 7.60698400  | 0.53512200  | -1.17267600 |
| H  | 7.81299000  | 1.31955600  | -3.18234300 |
| H  | 8.44172200  | -0.30714700 | -2.99655100 |
| P  | 4.00412700  | -0.12865900 | 0.34904400  |
| C  | 6.80554100  | -0.57217800 | -0.47176500 |
| H  | 5.05929000  | -1.66799200 | -1.08671900 |
| H  | 7.17981500  | 1.51255300  | -0.91504900 |
| H  | 8.63343500  | 0.54496400  | -0.78816300 |
| Au | 1.90350300  | 0.31650000  | -0.72425200 |
| C  | 4.06258300  | -1.52452300 | 1.57967900  |
| C  | 4.65878300  | 1.39180500  | 1.24975200  |
| H  | 6.90303700  | -0.47496100 | 0.61303200  |
| H  | 7.26119300  | -1.54060900 | -0.71472200 |
| C  | 3.14763500  | -2.61205900 | 1.64461100  |
| C  | 5.13082900  | -1.49251700 | 2.49952500  |
| C  | 3.91197800  | 1.69786500  | 2.56598000  |
| C  | 4.63202000  | 2.64299200  | 0.34081600  |
| H  | 5.70972500  | 1.18102500  | 1.49136800  |
| C  | 1.91511800  | -2.85273500 | 0.79799800  |
| C  | 3.37418000  | -3.60251000 | 2.61964300  |
| C  | 5.32618900  | -2.48347200 | 3.45755400  |
| H  | 5.82927600  | -0.66412300 | 2.48321800  |
| C  | 4.54386500  | 2.90196800  | 3.28702800  |
| H  | 2.86357500  | 1.92811500  | 2.33803700  |
| H  | 3.91540400  | 0.82732900  | 3.22847800  |
| C  | 5.25452000  | 3.85683000  | 1.05593400  |
| H  | 5.16852400  | 2.46121700  | -0.59481600 |
| H  | 3.59058700  | 2.86516900  | 0.07591700  |
| C  | 0.63827700  | -2.46057500 | 1.30818000  |
| C  | 1.96460800  | -3.65872700 | -0.37299900 |
| C  | 4.43783900  | -3.55353300 | 3.51606800  |
| H  | 2.68644800  | -4.44174000 | 2.65844700  |
| H  | 6.16279200  | -2.41404700 | 4.14657900  |
| C  | 4.56288100  | 4.14981400  | 2.39424700  |
| H  | 3.98940800  | 3.10252400  | 4.21208500  |
| H  | 5.57088100  | 2.64686900  | 3.58833500  |
| H  | 5.19996100  | 4.73188300  | 0.39596600  |
| H  | 6.32412000  | 3.66456100  | 1.22710700  |
| C  | -0.51714100 | -2.82181500 | 0.60409600  |
| C  | 0.33932800  | -1.76974500 | 2.65445100  |

|   |              |             |             |
|---|--------------|-------------|-------------|
| C | 0.75733200   | -4.00221300 | -1.00823300 |
| C | 3.18711900   | -4.27944800 | -1.08712600 |
| H | 4.56793400   | -4.34403100 | 4.24968200  |
| H | 3.53044500   | 4.46971600  | 2.20295000  |
| H | 5.06801200   | 4.97718300  | 2.90787500  |
| C | -0.49206600  | -3.60257500 | -0.55209300 |
| H | -1.47812100  | -2.52109900 | 1.01670300  |
| H | -0.66874000  | -1.35391000 | 2.52033200  |
| C | 0.21526000   | -2.79399700 | 3.80459700  |
| C | 1.21193400   | -0.58298900 | 3.08338400  |
| H | 0.80615900   | -4.64376900 | -1.88606000 |
| C | 4.50190400   | -4.49793600 | -0.32357700 |
| C | 3.43697500   | -3.55878800 | -2.43246500 |
| H | 2.85079900   | -5.29111600 | -1.35293900 |
| C | -1.76658800  | -4.06300900 | -1.24730200 |
| H | -0.18431200  | -2.30483100 | 4.70132100  |
| H | -0.45813500  | -3.61516400 | 3.53649000  |
| H | 1.18691000   | -3.22177300 | 4.06768500  |
| H | 0.71392000   | -0.04758000 | 3.90145400  |
| H | 1.35929200   | 0.12247400  | 2.25931100  |
| H | 2.19259100   | -0.89217400 | 3.44933900  |
| H | 5.18431000   | -5.06469300 | -0.96780700 |
| H | 4.35081000   | -5.07959000 | 0.58930100  |
| H | 5.00793900   | -3.57116400 | -0.04407800 |
| H | 2.56067500   | -3.62023400 | -3.08577700 |
| H | 3.65333400   | -2.49646400 | -2.28838800 |
| H | 4.28276000   | -4.01351900 | -2.96160600 |
| C | -2.61390400  | -4.97268300 | -0.33655200 |
| C | -2.60257900  | -2.88341400 | -1.77755800 |
| H | -1.46115200  | -4.66070400 | -2.11646200 |
| H | -2.03400500  | -5.83515800 | 0.00811900  |
| H | -2.96733900  | -4.43266100 | 0.55013200  |
| H | -3.49345400  | -5.34633900 | -0.87371800 |
| H | -3.49246500  | -3.24724400 | -2.30471900 |
| H | -2.01797000  | -2.27093800 | -2.47348800 |
| H | -2.94013000  | -2.23834800 | -0.95568100 |
| H | -13.12217400 | 1.38910800  | 1.32121200  |
| C | -12.72518400 | 0.42585300  | 1.01203700  |
| C | -13.59418300 | -0.58941500 | 0.60283300  |
| C | -11.34840100 | 0.20641500  | 1.02843900  |
| H | -14.66704000 | -0.41822100 | 0.59353800  |
| C | -13.07760700 | -1.82223300 | 0.20255900  |
| C | -10.82266700 | -1.02861500 | 0.62692400  |
| H | -10.67188900 | 0.99669700  | 1.34018800  |

|                     |              |             |             |
|---------------------|--------------|-------------|-------------|
| C                   | -11.69759600 | -2.03677900 | 0.20951100  |
| H                   | -13.74581500 | -2.61473500 | -0.12296000 |
| C                   | -9.33626800  | -1.28386400 | 0.68517800  |
| H                   | -11.29924900 | -2.99628200 | -0.11324500 |
| O                   | -8.63363500  | -0.15875200 | 0.16377100  |
| H                   | -9.01401700  | -1.45827800 | 1.72709600  |
| H                   | -9.08007800  | -2.18996100 | 0.11301000  |
| C                   | -7.23534700  | -0.28393900 | 0.26170600  |
| C                   | -6.62105200  | 0.99029000  | -0.31846300 |
| H                   | -6.92524700  | -0.41692100 | 1.31403400  |
| H                   | -6.87924000  | -1.16959800 | -0.29426100 |
| C                   | -5.08989400  | 0.97197000  | -0.25676300 |
| H                   | -6.95740200  | 1.09935800  | -1.35615300 |
| H                   | -7.01274100  | 1.85032200  | 0.23812900  |
| C                   | -4.49805600  | 2.31212700  | -0.83372900 |
| H                   | -4.69549500  | 0.12726700  | -0.83311900 |
| H                   | -4.75062400  | 0.85022400  | 0.77906100  |
| H                   | -4.86707900  | 3.13712800  | -0.21654200 |
| H                   | -4.85623900  | 2.41967500  | -1.86187100 |
| Ts <sub>2c</sub> -3 |              |             |             |
| C                   | -2.35397500  | 2.52921600  | 0.30686800  |
| C                   | -3.11260700  | 2.17730100  | -0.95335800 |
| C                   | -2.29391300  | 1.65347300  | -1.93540100 |
| C                   | -0.79623200  | 1.55755300  | -1.30503600 |
| C                   | -0.86016000  | 2.44296200  | -0.07313300 |
| C                   | -2.87849700  | 3.72386200  | 1.14929400  |
| C                   | -2.11748800  | 3.84507700  | 2.47972900  |
| C                   | -2.94763100  | 5.06772300  | 0.40339600  |
| C                   | 0.25864400   | 0.84337100  | -1.79023000 |
| C                   | -2.73988400  | 0.90085200  | -3.13534700 |
| C                   | -3.43538100  | 1.43459000  | -4.14256600 |
| C                   | 0.34769300   | 0.37644400  | -3.17384200 |
| C                   | 0.25348000   | 1.16686700  | -4.25728800 |
| O                   | -0.34977400  | 3.74242000  | -0.48765200 |
| C                   | 0.76287400   | 4.22261800  | 0.13480200  |
| C                   | 1.23414600   | 5.49791900  | -0.51581600 |
| O                   | 1.29032300   | 3.67393600  | 1.07798300  |
| H                   | -2.51768300  | 1.63424100  | 0.93740300  |
| H                   | -1.36109400  | 2.40648700  | -2.20655400 |
| H                   | -0.23377200  | 2.07453100  | 0.73615300  |
| H                   | -3.91234300  | 3.45078200  | 1.40358600  |
| H                   | -2.57237100  | 4.62146200  | 3.10387400  |
| H                   | -2.14846300  | 2.90587900  | 3.04528800  |
| H                   | -1.06554600  | 4.11050200  | 2.33311900  |

|    |             |             |             |
|----|-------------|-------------|-------------|
| H  | -3.50811700 | 5.79216600  | 1.00401700  |
| H  | -3.45711000 | 4.97682100  | -0.56315100 |
| H  | -1.95608600 | 5.48458600  | 0.21624300  |
| H  | -2.49132800 | -0.15734800 | -3.14402200 |
| H  | -3.77788700 | 0.82279000  | -4.97174700 |
| H  | -3.68133100 | 2.49298300  | -4.18329200 |
| H  | 0.63173700  | -0.66733100 | -3.30669900 |
| H  | 0.41194700  | 0.77444800  | -5.25717600 |
| H  | 0.06842600  | 2.23575900  | -4.17896400 |
| H  | 1.94795100  | 5.99864200  | 0.13917000  |
| H  | 0.39417200  | 6.16091000  | -0.74061500 |
| H  | 1.72702900  | 5.25692600  | -1.46516800 |
| H  | 6.17980000  | 0.36852800  | -4.07799900 |
| C  | 6.36689700  | -0.05891700 | -3.08641200 |
| C  | 5.16597300  | 0.20863100  | -2.16591900 |
| C  | 7.68083100  | 0.50716900  | -2.49462600 |
| H  | 6.45723000  | -1.14359500 | -3.23463600 |
| C  | 5.33641400  | -0.56912200 | -0.83527200 |
| H  | 5.07276200  | 1.28664300  | -1.99316500 |
| H  | 4.23253800  | -0.10090300 | -2.65015700 |
| C  | 7.63846200  | 0.58960100  | -0.95272300 |
| H  | 7.87762800  | 1.50588100  | -2.90211300 |
| H  | 8.52085000  | -0.12291600 | -2.81006200 |
| P  | 4.01214400  | -0.13982800 | 0.44231100  |
| C  | 6.81879200  | -0.55716200 | -0.34204500 |
| H  | 5.08146100  | -1.60976000 | -1.05203000 |
| H  | 7.20848700  | 1.54974800  | -0.64186400 |
| H  | 8.65568900  | 0.57008100  | -0.54511500 |
| Au | 1.93515100  | 0.35130700  | -0.65037400 |
| C  | 4.04045600  | -1.58848200 | 1.60633300  |
| C  | 4.63950500  | 1.33668000  | 1.42676000  |
| H  | 6.88919100  | -0.52875700 | 0.74907800  |
| H  | 7.27795800  | -1.51009800 | -0.63424200 |
| C  | 3.13422200  | -2.68446700 | 1.58426300  |
| C  | 5.07405900  | -1.59081500 | 2.56589000  |
| C  | 3.83746800  | 1.58494300  | 2.72310900  |
| C  | 4.66419400  | 2.62848800  | 0.57656900  |
| H  | 5.67755200  | 1.10293800  | 1.69999200  |
| C  | 1.94778900  | -2.89944600 | 0.66857400  |
| C  | 3.32715500  | -3.71387600 | 2.52529300  |
| C  | 5.23845500  | -2.62263500 | 3.48576600  |
| H  | 5.76886700  | -0.76056000 | 2.61343600  |
| C  | 4.44175200  | 2.75019900  | 3.52661700  |
| H  | 2.80144100  | 1.82991500  | 2.45942300  |

|   |             |             |             |
|---|-------------|-------------|-------------|
| H | 3.81009600  | 0.68430100  | 3.34335100  |
| C | 5.26246400  | 3.80035600  | 1.37777000  |
| H | 5.24450900  | 2.48612600  | -0.33956300 |
| H | 3.63878000  | 2.87666600  | 0.27756900  |
| C | 0.64296500  | -2.53098700 | 1.12487200  |
| C | 2.06486200  | -3.66975000 | -0.52199500 |
| C | 4.35393400  | -3.69726600 | 3.46489100  |
| H | 2.64425300  | -4.55744400 | 2.49972900  |
| H | 6.04790700  | -2.58013400 | 4.20848300  |
| C | 4.50904200  | 4.03689500  | 2.69375600  |
| H | 3.84560800  | 2.91209900  | 4.43291800  |
| H | 5.45236000  | 2.47453800  | 3.86315500  |
| H | 5.24725200  | 4.70594500  | 0.75817900  |
| H | 6.32083500  | 3.58905600  | 1.59081900  |
| C | -0.47219700 | -2.88203600 | 0.35285300  |
| C | 0.26931600  | -1.89222000 | 2.47926000  |
| C | 0.89368000  | -4.00946300 | -1.22300100 |
| C | 3.32632400  | -4.25869400 | -1.19590200 |
| H | 4.45969200  | -4.51706300 | 4.16961100  |
| H | 3.48813000  | 4.37074000  | 2.46817300  |
| H | 4.99236200  | 4.83689300  | 3.26776300  |
| C | -0.38107600 | -3.63593400 | -0.81811400 |
| H | -1.45564400 | -2.59981400 | 0.72247100  |
| H | -0.73837100 | -1.48864400 | 2.31263500  |
| C | 0.11108300  | -2.96099100 | 3.58410900  |
| C | 1.09861900  | -0.70833100 | 2.99260900  |
| H | 0.99171600  | -4.62915800 | -2.11231100 |
| C | 4.61719300  | -4.46608000 | -0.38935100 |
| C | 3.61373500  | -3.51482700 | -2.52167700 |
| H | 3.01883200  | -5.27201700 | -1.48863900 |
| C | -1.61337500 | -4.09033000 | -1.58938800 |
| H | -0.34739100 | -2.51445800 | 4.47463600  |
| H | -0.52735300 | -3.78612600 | 3.25094200  |
| H | 1.07766100  | -3.37632000 | 3.88372000  |
| H | 0.56233700  | -0.22543200 | 3.81887500  |
| H | 1.25181400  | 0.04286000  | 2.21044800  |
| H | 2.07550600  | -1.01084000 | 3.37377700  |
| H | 5.33229900  | -5.00836000 | -1.01893100 |
| H | 4.44582100  | -5.06708300 | 0.50692600  |
| H | 5.09661200  | -3.53573400 | -0.07608900 |
| H | 2.76705400  | -3.58923700 | -3.21166100 |
| H | 3.79940600  | -2.44927400 | -2.35667600 |
| H | 4.49106400  | -3.94244300 | -3.02098300 |
| C | -2.54671800 | -4.95708900 | -0.72263700 |

|   |              |             |             |
|---|--------------|-------------|-------------|
| C | -2.37796800  | -2.90444600 | -2.20580300 |
| H | -1.25965700  | -4.71648300 | -2.41932400 |
| H | -2.01274300  | -5.81758600 | -0.30626200 |
| H | -2.96297500  | -4.38423100 | 0.11454300  |
| H | -3.38616900  | -5.33308500 | -1.31873400 |
| H | -3.24177700  | -3.25618400 | -2.78180200 |
| H | -1.72928500  | -2.33133200 | -2.87899500 |
| H | -2.74752900  | -2.22497000 | -1.42732500 |
| H | -13.35733000 | 1.30804900  | 0.60635500  |
| C | -12.89864800 | 0.32339800  | 0.64229600  |
| C | -13.69032400 | -0.82110300 | 0.51609900  |
| C | -11.51966700 | 0.20809000  | 0.81630000  |
| H | -14.76477600 | -0.72977100 | 0.38272300  |
| C | -13.09345800 | -2.08187800 | 0.55735500  |
| C | -10.91384700 | -1.05413900 | 0.85728400  |
| H | -10.90203200 | 1.09640700  | 0.90636600  |
| C | -11.71137600 | -2.19540300 | 0.72146500  |
| H | -13.70033500 | -2.97717300 | 0.45294500  |
| C | -9.42719000  | -1.18696700 | 1.08789500  |
| H | -11.25009500 | -3.18057700 | 0.74156600  |
| O | -8.73500800  | -0.17429100 | 0.36927300  |
| H | -9.19376100  | -1.09368800 | 2.16393100  |
| H | -9.08010700  | -2.18456800 | 0.77186300  |
| C | -7.34105900  | -0.19686000 | 0.57795000  |
| C | -6.72795100  | 0.93792600  | -0.23838800 |
| H | -7.10449000  | -0.07478400 | 1.65045600  |
| H | -6.91714600  | -1.16763400 | 0.26339400  |
| C | -5.19937000  | 0.98614300  | -0.13309200 |
| H | -7.02819500  | 0.81014300  | -1.28581800 |
| H | -7.16146400  | 1.88739200  | 0.10070000  |
| C | -4.60712800  | 2.14056100  | -0.98736900 |
| H | -4.77146900  | 0.03457700  | -0.47607100 |
| H | -4.89991700  | 1.10799100  | 0.91624600  |
| H | -5.00212300  | 3.09160200  | -0.60936000 |
| H | -4.95488600  | 2.02634600  | -2.01645000 |

3e-3

|   |             |            |             |
|---|-------------|------------|-------------|
| C | -2.14490300 | 2.93215800 | -0.81528600 |
| C | -2.52676900 | 1.45806400 | -0.88069500 |
| C | -1.66430000 | 0.73010800 | -1.63030900 |
| C | -0.52994300 | 1.62780100 | -2.18591600 |
| C | -0.66572200 | 2.88085200 | -1.27893600 |
| C | -3.13108200 | 3.87777700 | -1.57628600 |
| C | -2.93977500 | 5.35829300 | -1.20345900 |
| C | -3.16346800 | 3.67253900 | -3.09879800 |



|   |             |             |             |
|---|-------------|-------------|-------------|
| C | 0.79828800  | 0.95687100  | -2.08826200 |
| C | -1.67110600 | -0.70282700 | -1.94512800 |
| C | -2.74195800 | -1.48624900 | -2.14054900 |
| C | 1.46152900  | 0.49575800  | -3.28789600 |
| C | 1.28149900  | 1.01182900  | -4.52624500 |
| O | -0.26144000 | 4.09788000  | -1.93357600 |
| C | 1.04145500  | 4.22483500  | -2.25916100 |
| C | 1.34713300  | 5.58468200  | -2.82932400 |
| O | 1.85418300  | 3.33036800  | -2.10013800 |
| H | -2.16798600 | 3.26493700  | 0.23222300  |
| H | -0.77540100 | 1.89752500  | -3.22233700 |
| H | -0.01649300 | 2.73935400  | -0.40973900 |
| H | -4.12123900 | 3.59878300  | -1.19601400 |
| H | -3.74957400 | 5.95975000  | -1.63185400 |
| H | -2.96512800 | 5.49895900  | -0.11592500 |
| H | -1.99253900 | 5.75661600  | -1.57473800 |
| H | -3.98588800 | 4.24759500  | -3.53847800 |
| H | -3.31906700 | 2.62041600  | -3.36357000 |
| H | -2.23641600 | 4.01559600  | -3.57024800 |
| H | -0.68807300 | -1.16556300 | -2.03856300 |
| H | -2.62258200 | -2.54542700 | -2.34972100 |
| H | -3.75888200 | -1.10940200 | -2.12579200 |
| H | 2.22017100  | -0.27282000 | -3.15846400 |
| H | 1.87407300  | 0.65841100  | -5.36585600 |
| H | 0.59416700  | 1.82569300  | -4.73457700 |
| H | 0.66038400  | 5.81856500  | -3.64875100 |
| H | 2.37838700  | 5.61179400  | -3.18227100 |
| H | 1.20384800  | 6.34808000  | -2.05666200 |
| H | 5.72756000  | 3.97320900  | 0.41949100  |
| C | 5.72233000  | 3.11123600  | 1.09592700  |
| C | 4.39606400  | 2.34744600  | 0.95763400  |
| C | 5.97326700  | 3.56690900  | 2.55515200  |
| H | 6.53772700  | 2.45635700  | 0.76026300  |
| C | 4.46813700  | 1.02031700  | 1.75566800  |
| H | 3.57375500  | 2.98241800  | 1.30566500  |
| H | 4.18192500  | 2.13260800  | -0.09525400 |
| C | 5.23880600  | 2.67467500  | 3.57907000  |
| H | 5.64862300  | 4.60577300  | 2.68733100  |
| H | 7.05044400  | 3.55494800  | 2.75897900  |
| P | 2.81853700  | 0.09394800  | 1.77865100  |
| C | 5.19210500  | 1.20690100  | 3.12753100  |
| H | 5.08014500  | 0.33652700  | 1.16068600  |
| H | 4.21599300  | 3.04308000  | 3.72985400  |
| H | 5.72829300  | 2.74064400  | 4.55744000  |

|    |             |             |             |
|----|-------------|-------------|-------------|
| Au | 1.66941400  | 0.47108800  | -0.29945000 |
| C  | 3.28392200  | -1.65866800 | 2.17108600  |
| C  | 1.83234000  | 0.74072900  | 3.24826100  |
| H  | 4.75068200  | 0.58855700  | 3.91383100  |
| H  | 6.22057000  | 0.84007300  | 3.01940200  |
| C  | 3.37404000  | -2.72110700 | 1.22949100  |
| C  | 3.60383200  | -1.92080400 | 3.51926700  |
| C  | 0.63477500  | -0.15998700 | 3.61813400  |
| C  | 1.34100200  | 2.18784700  | 3.00722700  |
| H  | 2.52475100  | 0.76283900  | 4.10058900  |
| C  | 3.04074600  | -2.70499500 | -0.24883000 |
| C  | 3.80763300  | -3.97486200 | 1.70208000  |
| C  | 4.01913000  | -3.17472200 | 3.95780500  |
| H  | 3.51609700  | -1.13075500 | 4.25629200  |
| C  | -0.11416100 | 0.38310800  | 4.84767200  |
| H  | -0.05709900 | -0.20127800 | 2.76634200  |
| H  | 0.96341500  | -1.18562400 | 3.80819900  |
| C  | 0.58311600  | 2.73260500  | 4.23217800  |
| H  | 2.17678300  | 2.85364600  | 2.77438900  |
| H  | 0.67677400  | 2.19557600  | 2.13114300  |
| C  | 1.76634800  | -3.19499400 | -0.67482700 |
| C  | 4.04033700  | -2.45817600 | -1.23301500 |
| C  | 4.12846700  | -4.21208600 | 3.03558000  |
| H  | 3.89682600  | -4.78346600 | 0.98342600  |
| H  | 4.25305700  | -3.33296300 | 5.00633900  |
| C  | -0.58787500 | 1.82585800  | 4.63082900  |
| H  | -0.96515300 | -0.27136500 | 5.07111600  |
| H  | 0.54823100  | 0.34282200  | 5.72454800  |
| H  | 0.22873800  | 3.74794800  | 4.01578700  |
| H  | 1.28129600  | 2.82103800  | 5.07695300  |
| C  | 1.52112700  | -3.36102500 | -2.04634900 |
| C  | 0.61211500  | -3.71202400 | 0.20837400  |
| C  | 3.72079300  | -2.66379800 | -2.58705500 |
| C  | 5.50721500  | -2.00760700 | -1.04707200 |
| H  | 4.45713600  | -5.19909900 | 3.34792900  |
| H  | -1.34804300 | 1.84236700  | 3.83571800  |
| H  | -1.07354700 | 2.20917200  | 5.53588700  |
| C  | 2.48106900  | -3.11788700 | -3.02819200 |
| H  | 0.55063900  | -3.75063500 | -2.34242600 |
| H  | -0.26765600 | -3.65683900 | -0.44548700 |
| C  | 0.78623900  | -5.20872900 | 0.55103300  |
| C  | 0.22844200  | -2.91304400 | 1.45869300  |
| H  | 4.50314600  | -2.49852600 | -3.32626100 |
| C  | 6.23459100  | -2.27540200 | 0.27965200  |

|   |              |             |             |
|---|--------------|-------------|-------------|
| C | 5.67383200   | -0.53606500 | -1.48953600 |
| H | 6.06004900   | -2.60136000 | -1.78749900 |
| C | 2.25281900   | -3.42989800 | -4.50278500 |
| H | -0.13373200  | -5.59676900 | 1.00399500  |
| H | 0.99904400   | -5.80161700 | -0.34488400 |
| H | 1.59897300   | -5.36648500 | 1.26598600  |
| H | -0.74466800  | -3.26416400 | 1.82243200  |
| H | 0.13143800   | -1.84661000 | 1.23208800  |
| H | 0.94379000   | -3.03356600 | 2.27422000  |
| H | 7.29087400   | -2.01139400 | 0.15232300  |
| H | 6.19023400   | -3.33059000 | 0.56174900  |
| H | 5.84955100   | -1.69355100 | 1.12022300  |
| H | 5.37011000   | -0.39851800 | -2.53249600 |
| H | 5.06255900   | 0.14106800  | -0.88591600 |
| H | 6.72076500   | -0.22293100 | -1.40102900 |
| C | 2.59824400   | -4.90610200 | -4.79459000 |
| C | 0.83577300   | -3.10058100 | -5.00090600 |
| H | 2.95943400   | -2.81152500 | -5.07463600 |
| H | 3.62539600   | -5.14083000 | -4.49624100 |
| H | 1.92745600   | -5.57814100 | -4.24621600 |
| H | 2.49472300   | -5.12330200 | -5.86394000 |
| H | 0.77362300   | -3.24935800 | -6.08451200 |
| H | 0.55594600   | -2.06329200 | -4.78414700 |
| H | 0.08308100   | -3.75336000 | -4.54386900 |
| H | -13.55941000 | -2.90712900 | 0.72007600  |
| C | -12.70208300 | -2.36335900 | 1.10764800  |
| C | -12.47936000 | -2.29373600 | 2.48379600  |
| C | -11.81657000 | -1.74309900 | 0.22422800  |
| H | -13.16413600 | -2.78018800 | 3.17311600  |
| C | -11.36869900 | -1.59936900 | 2.96953900  |
| C | -10.70720100 | -1.03852900 | 0.70437300  |
| H | -11.98941300 | -1.80975500 | -0.84796800 |
| C | -10.48995900 | -0.97199500 | 2.08607500  |
| H | -11.18719400 | -1.54513000 | 4.03986000  |
| C | -9.78942300  | -0.32091500 | -0.25790500 |
| H | -9.62200900  | -0.43822700 | 2.46005500  |
| O | -8.45359400  | -0.36416100 | 0.21973900  |
| H | -9.85391700  | -0.77925400 | -1.25891000 |
| H | -10.10358100 | 0.73280700  | -0.37064800 |
| C | -7.55174600  | 0.36291400  | -0.58717900 |
| C | -6.16183000  | 0.25261200  | 0.03153400  |
| H | -7.54666200  | -0.03675400 | -1.61717000 |
| H | -7.86075400  | 1.42155700  | -0.65549500 |
| C | -5.09280700  | 1.00084800  | -0.77437900 |

|                     |             |             |             |
|---------------------|-------------|-------------|-------------|
| H                   | -6.20446700 | 0.64451100  | 1.05612300  |
| H                   | -5.90010900 | -0.81036900 | 0.11359200  |
| C                   | -3.69983700 | 0.90773000  | -0.10607800 |
| H                   | -5.38987800 | 2.05073500  | -0.88183600 |
| H                   | -5.04216400 | 0.59544100  | -1.79359800 |
| H                   | -3.49935100 | -0.14884300 | 0.11176700  |
| H                   | -3.75131700 | 1.42709800  | 0.86161700  |
| Ts <sub>3c</sub> -3 |             |             |             |
| C                   | 2.92713800  | -1.73571700 | 0.44417900  |
| C                   | 3.62576400  | -0.41345700 | 0.16213800  |
| C                   | 2.79465100  | 0.52218500  | -0.38183300 |
| C                   | 1.42837700  | -0.05623000 | -0.52543500 |
| C                   | 1.51955100  | -1.55900100 | -0.18017100 |
| C                   | 3.74363700  | -3.02810100 | 0.15492500  |
| C                   | 3.07682900  | -4.27109900 | 0.76799800  |
| C                   | 4.13804800  | -3.25939200 | -1.31528500 |
| C                   | 0.16695700  | 0.59410300  | -0.68865000 |
| C                   | 3.10100600  | 1.94790900  | -0.57882700 |
| C                   | 4.18686600  | 2.43995300  | -1.18679700 |
| C                   | 0.05758300  | 1.94789100  | -1.24637100 |
| C                   | 0.50729300  | 2.35692300  | -2.44223100 |
| O                   | 1.35300900  | -2.24661200 | -1.44326800 |
| C                   | 0.44451100  | -3.26274500 | -1.52434700 |
| C                   | 0.36984300  | -3.79437700 | -2.93309200 |
| O                   | -0.19261100 | -3.66850100 | -0.57940300 |
| H                   | 2.76874700  | -1.74904300 | 1.53589300  |
| H                   | 0.97091300  | -0.08442600 | -1.67201500 |
| H                   | 0.71849600  | -1.87976600 | 0.48550200  |
| H                   | 4.67768800  | -2.87729600 | 0.71302900  |
| H                   | 3.71602300  | -5.14973700 | 0.62811800  |
| H                   | 2.91854100  | -4.14616100 | 1.84591400  |
| H                   | 2.10517400  | -4.49181400 | 0.31488800  |
| H                   | 4.96211200  | -3.97986800 | -1.36611300 |
| H                   | 4.46990100  | -2.33797900 | -1.80498500 |
| H                   | 3.31199300  | -3.66329800 | -1.90400600 |
| H                   | 2.37240100  | 2.64711200  | -0.17558200 |
| H                   | 4.35433500  | 3.51104800  | -1.24904200 |
| H                   | 4.93039600  | 1.80316400  | -1.65659200 |
| H                   | -0.57877000 | 2.61207300  | -0.66187800 |
| H                   | 0.29004300  | 3.35634700  | -2.80437900 |
| H                   | 1.06731300  | 1.70829400  | -3.11252100 |
| H                   | 0.10742600  | -2.99165500 | -3.62985500 |
| H                   | -0.37479500 | -4.58929000 | -2.98074700 |
| H                   | 1.34501000  | -4.18622900 | -3.24116700 |

|    |             |             |             |
|----|-------------|-------------|-------------|
| H  | -3.60504500 | -3.39320500 | -4.08168400 |
| C  | -4.33888000 | -3.08249000 | -3.32910700 |
| C  | -3.63037300 | -2.35661100 | -2.17431300 |
| C  | -5.14817900 | -4.30358900 | -2.82927300 |
| H  | -5.00508400 | -2.36897700 | -3.83249300 |
| C  | -4.67860400 | -1.73141500 | -1.21738800 |
| H  | -2.97295000 | -3.05670500 | -1.64661300 |
| H  | -2.98118200 | -1.56338200 | -2.56397300 |
| C  | -5.60393900 | -4.13611300 | -1.36349300 |
| H  | -4.54693900 | -5.21623700 | -2.91682800 |
| H  | -6.02101200 | -4.44815500 | -3.47668200 |
| P  | -3.88709400 | -1.02230900 | 0.35276100  |
| C  | -5.91378100 | -2.66942800 | -1.02820300 |
| H  | -5.03911200 | -0.81859200 | -1.70112100 |
| H  | -4.82604900 | -4.50888600 | -0.68587100 |
| H  | -6.49071600 | -4.75052100 | -1.17076400 |
| Au | -1.70138500 | -0.20232100 | -0.20160500 |
| C  | -5.13372000 | 0.20992200  | 0.97545700  |
| C  | -3.83604200 | -2.41272900 | 1.62709200  |
| H  | -6.33605200 | -2.59757900 | -0.02304000 |
| H  | -6.70802700 | -2.31592200 | -1.69784900 |
| C  | -5.07163900 | 1.62764500  | 0.86525900  |
| C  | -6.26811300 | -0.36661700 | 1.58664600  |
| C  | -3.62023600 | -1.91895000 | 3.07325000  |
| C  | -2.76596300 | -3.46781100 | 1.27094200  |
| H  | -4.81806200 | -2.90282400 | 1.57558700  |
| C  | -3.98109500 | 2.51911600  | 0.29886600  |
| C  | -6.17002000 | 2.36474000  | 1.35320900  |
| C  | -7.33343600 | 0.39009000  | 2.06385200  |
| H  | -6.32227900 | -1.44111800 | 1.71068700  |
| C  | -3.65103400 | -3.09273200 | 4.06808800  |
| H  | -2.64641300 | -1.41617400 | 3.14038900  |
| H  | -4.37810600 | -1.18178900 | 3.35189900  |
| C  | -2.78689900 | -4.64052000 | 2.26733900  |
| H  | -2.90878300 | -3.85433300 | 0.25907700  |
| H  | -1.77515300 | -2.99949900 | 1.27824300  |
| C  | -3.07932300 | 3.16621900  | 1.19995100  |
| C  | -4.03295100 | 2.97044200  | -1.05159100 |
| C  | -7.28578900 | 1.77513500  | 1.93887200  |
| H  | -6.13377000 | 3.44534300  | 1.25719300  |
| H  | -8.18368200 | -0.10170400 | 2.52683500  |
| C  | -2.61168600 | -4.16427500 | 3.71465200  |
| H  | -3.48203700 | -2.71120400 | 5.08230400  |
| H  | -4.65521300 | -3.54143500 | 4.06747700  |

|   |             |             |             |
|---|-------------|-------------|-------------|
| H | -1.99733600 | -5.35111200 | 1.99593200  |
| H | -3.74043700 | -5.18081200 | 2.17323500  |
| C | -2.26390500 | 4.20490100  | 0.72520300  |
| C | -2.94595200 | 2.94419200  | 2.72000500  |
| C | -3.18914600 | 4.02147000  | -1.44892500 |
| C | -4.92002800 | 2.46420100  | -2.20902000 |
| H | -8.10342800 | 2.39454200  | 2.29599900  |
| H | -1.60254500 | -3.74477000 | 3.83937600  |
| H | -2.68644700 | -5.01128600 | 4.40690700  |
| C | -2.30997300 | 4.67228000  | -0.58856500 |
| H | -1.60451100 | 4.69477600  | 1.43722300  |
| H | -1.95466200 | 3.34935500  | 2.96026300  |
| C | -3.94905000 | 3.79751800  | 3.52778600  |
| C | -2.92812300 | 1.49987700  | 3.23100000  |
| H | -3.25623300 | 4.36804500  | -2.47876000 |
| C | -6.32005100 | 1.90277600  | -1.91413000 |
| C | -4.10697500 | 1.51596800  | -3.11745600 |
| H | -5.10649900 | 3.36145800  | -2.81321600 |
| C | -1.52321700 | 5.89106000  | -1.05654900 |
| H | -3.68628600 | 3.77221300  | 4.59199100  |
| H | -3.93578000 | 4.84307400  | 3.20172700  |
| H | -4.97133700 | 3.42130600  | 3.42979700  |
| H | -2.56433800 | 1.48455300  | 4.26536400  |
| H | -2.25664700 | 0.87442700  | 2.63153000  |
| H | -3.91936100 | 1.04412600  | 3.22777900  |
| H | -6.84303400 | 1.75979200  | -2.86711700 |
| H | -6.91503300 | 2.59509600  | -1.31199200 |
| H | -6.31101600 | 0.94078200  | -1.39703600 |
| H | -3.20579900 | 2.01098500  | -3.49453400 |
| H | -3.77934400 | 0.62331800  | -2.57609200 |
| H | -4.70543400 | 1.19590700  | -3.97885600 |
| C | -2.26181300 | 7.18767600  | -0.66176200 |
| C | -0.06911800 | 5.92523900  | -0.55543800 |
| H | -1.49522100 | 5.85259900  | -2.15464700 |
| H | -3.28221300 | 7.20007500  | -1.05899700 |
| H | -2.32456100 | 7.28455300  | 0.42865200  |
| H | -1.73363000 | 8.06641600  | -1.04919400 |
| H | 0.46012600  | 6.77875600  | -0.99317000 |
| H | 0.47775500  | 5.01496800  | -0.82728100 |
| H | -0.01646000 | 6.03671700  | 0.53372900  |
| H | 15.36807100 | 1.64863500  | -0.45250600 |
| C | 14.52230900 | 1.24221600  | 0.09557700  |
| C | 14.57312100 | 1.13662500  | 1.48635900  |
| C | 13.37856400 | 0.83611000  | -0.59470400 |

|   |             |             |             |
|---|-------------|-------------|-------------|
| H | 15.45986200 | 1.45728100  | 2.02630900  |
| C | 13.47568000 | 0.62149700  | 2.18080600  |
| C | 12.27964700 | 0.31082500  | 0.09366700  |
| H | 13.34053200 | 0.93091700  | -1.67796600 |
| C | 12.33746600 | 0.20707200  | 1.48900900  |
| H | 13.50706500 | 0.54131600  | 3.26430000  |
| C | 11.07011000 | -0.18034500 | -0.66684000 |
| H | 11.48048600 | -0.18630700 | 2.02669500  |
| O | 9.88825800  | 0.10006500  | 0.06865800  |
| H | 11.02519300 | 0.29621900  | -1.66027000 |
| H | 11.14314100 | -1.26949600 | -0.83980000 |
| C | 8.72014500  | -0.40442500 | -0.54122000 |
| C | 7.53018300  | -0.03719700 | 0.34022500  |
| H | 8.59583800  | 0.02390800  | -1.55215000 |
| H | 8.78819900  | -1.50053200 | -0.66322600 |
| C | 6.19292600  | -0.51590200 | -0.23816500 |
| H | 7.68785600  | -0.46976700 | 1.33671500  |
| H | 7.51760300  | 1.05248400  | 0.46969900  |
| C | 5.00960200  | -0.13853900 | 0.68760500  |
| H | 6.22452900  | -1.60062000 | -0.38911800 |
| H | 6.03789200  | -0.07238100 | -1.23032800 |
| H | 5.08659600  | 0.93119500  | 0.91087700  |
| H | 5.13358500  | -0.67674900 | 1.63769200  |

4c-3

|   |            |             |             |
|---|------------|-------------|-------------|
| C | 2.45530800 | -1.02496200 | -0.40888300 |
| C | 1.62098000 | 0.23384700  | -0.62865800 |
| C | 2.38404700 | 1.36318800  | -0.53829200 |
| C | 3.79699300 | 1.00469500  | -0.32157800 |
| C | 3.88369100 | -0.46647400 | -0.67728500 |
| C | 2.19772700 | -1.72274400 | 0.96594000  |
| C | 2.79139300 | -3.14070400 | 1.02790700  |
| C | 2.61496400 | -0.88904900 | 2.18623300  |
| C | 4.85351900 | 1.74668100  | 0.07967100  |
| C | 1.95034600 | 2.74634300  | -0.78569600 |
| C | 0.82331200 | 3.33009200  | -0.35766300 |
| C | 4.86291700 | 3.13725900  | 0.49864200  |
| C | 5.97948400 | 3.80077100  | 0.84337600  |
| O | 4.95516900 | -1.12964500 | 0.01915500  |
| C | 5.81394800 | -1.88750500 | -0.71645600 |
| C | 6.88122600 | -2.48387900 | 0.17056300  |
| O | 5.71870200 | -2.06455600 | -1.90964400 |
| H | 2.20126000 | -1.76682000 | -1.17922400 |
| H | 5.81395300 | 1.23556900  | 0.13840700  |
| H | 4.08694900 | -0.56901200 | -1.74791000 |

|   |              |             |             |
|---|--------------|-------------|-------------|
| H | 1.10810400   | -1.85060100 | 1.01630100  |
| H | 2.41891500   | -3.66710900 | 1.91494400  |
| H | 2.51115200   | -3.73233500 | 0.14777500  |
| H | 3.88252200   | -3.12050000 | 1.09080300  |
| H | 2.30518200   | -1.39328000 | 3.10964400  |
| H | 2.15240700   | 0.10320800  | 2.17532100  |
| H | 3.69990800   | -0.75407200 | 2.22431200  |
| H | 2.63940900   | 3.33813200  | -1.38897700 |
| H | 0.58609600   | 4.35499500  | -0.62906000 |
| H | 0.11638400   | 2.82376400  | 0.29251100  |
| H | 3.90827800   | 3.65466900  | 0.55381000  |
| H | 5.95043700   | 4.83666800  | 1.16737600  |
| H | 6.95808900   | 3.32631500  | 0.81127900  |
| H | 7.30761700   | -1.72229700 | 0.82970900  |
| H | 7.65952700   | -2.93007600 | -0.44957500 |
| H | 6.43984800   | -3.25919800 | 0.80735300  |
| H | -10.29424300 | 0.45929200  | 1.08323000  |
| C | -9.41493900  | 0.17457800  | 0.51115800  |
| C | -9.54111100  | -0.20710700 | -0.82590800 |
| C | -8.15693700  | 0.20302400  | 1.11349500  |
| H | -10.51919200 | -0.22405100 | -1.29945800 |
| C | -8.40229300  | -0.56045100 | -1.55173800 |
| C | -7.01217900  | -0.15836500 | 0.39365800  |
| H | -8.06387100  | 0.51241200  | 2.15285000  |
| C | -7.14526100  | -0.54045000 | -0.94560300 |
| H | -8.49154700  | -0.85328700 | -2.59485000 |
| C | -5.66535200  | -0.17549000 | 1.08140800  |
| H | -6.25696500  | -0.80764000 | -1.50801200 |
| O | -4.62826000  | -0.00892400 | 0.13386000  |
| H | -5.62147800  | 0.61946400  | 1.84574000  |
| H | -5.52868000  | -1.13306400 | 1.61740300  |
| C | -3.33478400  | -0.09391700 | 0.70481600  |
| C | -2.30250600  | 0.08282600  | -0.40194600 |
| H | -3.20853000  | 0.68405100  | 1.47834300  |
| H | -3.20196500  | -1.06970300 | 1.20494500  |
| C | -0.86061000  | 0.01454400  | 0.11651000  |
| H | -2.46734400  | -0.69413400 | -1.16005200 |
| H | -2.48076100  | 1.04625500  | -0.89685600 |
| C | 0.17082000   | 0.16628100  | -1.02636800 |
| H | -0.70665700  | -0.93780300 | 0.63864500  |
| H | -0.69676500  | 0.80172700  | 0.86447700  |
| H | -0.07916900  | 1.07610900  | -1.58630600 |
| H | 0.03801900   | -0.68083600 | -1.71567900 |
